# Supplementary material for: Ancient antagonism between CELF and RBFOX families tunes mRNA splicing outcomes
Source: HighWire-hosted journal article supplement (doi:10.1101/gr.220517.117), 2017-05-16
Supplement: Supplemental_Methods.docx [file Supplemental_Methods.docx]

**Supplemental Methods – Gazzara et al.**

*Cell culture*

The JSL1 clonal population of Jurkat T cells (Lynch and Weiss 2000) was cultured in RPMI supplemented with 5% heat-inactivated fetal bovine serum (FBS) at 37°C in 5% CO2. For stimulation, the same growth medium was supplemented with the phorbol ester PMA (Sigma-Aldrich) for 48 hours (at a concentration of 20 ng/mL). HEK293 cells were cultured in DMEM with 10% heat-inactivated FBS at 37°C in 5% CO2. Depletion was achieved via stable lentiviral integration of a doxycycline-inducible shRNAs that targets CELF2 and/or RBFOX2. Targeted sequences are GCAGAGTAAAGGTTGTTGTTT  (CELF2) and CCTTTAAATTTCTGCCTTTAAT (RBFOX2). Induction of the shRNA was achieved by treatment with 1 mg/ml doxycycline for 48 hrs. Expression of Flag-tagged versions of CELF2 or RBFOX2 was done through stable integration of doxycycline-inducible cDNA expression constructs into JSL1 or HEK293 cells with neomycin as a selectable marker, as described previously (Rothrock et al. 2003). Treatment with doxycycline was done the same as above.

*Western blots*

Western blots were carried out as described previously, loading 10 μg of total protein lysates into 10% 37.5:1 bis-acrylamide SDS-PAGE gels (Melton et al. 2007). Antibodies used for Western blots were as follows: CELF2 (University of Florida Hybridoma Lab HL1889), RBFOX2, (Bethyl Labs A300-864A), hnRNP L (Abcam ab6106), and FLAG (Cell Signaling #2368).

*RT-PCR splicing validation*

Total RNA was isolated using RNABee (Tel-Test, Inc.) by following the manufacturer's protocol. Low cycle RT-PCR was performed as described in detail previously (Rothrock et al. 2003) using 32P-labeled, sequence-specific primers to flanking constitutive exons. All primers used and expected product sizes are detailed in Supplementary Table S4. Gels were quantified by densitometry through the use of a Typhoon Phosphorimager (Amersham Biosciences).

*Library preparation and sequencing*

We performed RNA-Seq on Jurkat T cell line (JSL1) that were unstimulated or stimulated as well as cells in both of these conditions that were depleted for CELF2 through stable lentiviral transfection of shRNAs. All samples were sequenced in duplicate. The efficacy of knockdown was confirmed by Western blot. Total RNA was isolated as above and further purified by DNAse treatment and RNeasy Kit (Qiagen). Purity was confirmed by bioanalyzer (RIN >8). PolyA-selection, generation of stranded Illumina RNA-Seq libraries and sequencing (151 nt paired-end) were done by the Genomics Division of the Iowa Institute of Human Genetics (<https://www.medicine.uiowa.edu/humangenetics/dna/)>.

*Mapping* *of RNA-Seq reads*

For all datasets we mapped reads using STAR (Dobin et al. 2013) with genomes generated using a custom splicing junction database for each organism. We mapped reads to the following genome assemblies: human to hg19, mouse to mm10, chicken to galGal4, *Drosophila* to dm6, and *C. elegans* to ce10. For junction spanning reads we required at least 8 positions to map across the splice junction on both sides by using the option --alignSJoverhangMin 8. Only uniquely mapped reads were utilized for downstream analysis. All accession numbers and description of samples utilized in this study are summarized in Supplementary Table S5.

*Differential splicing and gene expression analysis*

To quantify significant changes in gene expression from RNA-Seq data, we utilized DESeq (Anders et al 2010) with the default parameters. Genes with an FDR < 0.01 and absolute log2 fold-change > 1 were considered to be differentially expressed.

To quantify splicing changes in all datasets we utilized MAJIQ and VOILA to detect local splice variations (LSVs), as we have described previously (Vaquero-Garcia et al. 2016). Significant splicing changes in this study were defined as those with at least one junction that has a change in expected inclusion (E(ΔΨ)) of greater than 20% in either direction. High-confidence changes were those LSVs that had at least one junction with a probability of |ΔΨ| > 20% > 95% (Vaquero-Garcia et al. 2016). We classified cassette exons by combining evidence from single source and single target LSVs. For further detail on this and other computational analyses see Supplemental Methods.

*Motif and splicing code analysis*

For motif enrichment we first defined splicing relevant regions for all responsive and unresponsive cassette exons. There regions were defined as: the upstream constitutive exon (C1); the alternative exon (A); the downstream constitutive exon (C2); and all intron sequence between C1 and A or A and C2 and within 300 nt of an exon (Barash et al. 2010b; Barash et al. 2013). Counts for all 1024 possible pentamers were obtained for each of these regions and a hypergeometric test was applied to obtain significant differences in the presence or absence of a pentamer in a specific region in a regulated versus unresponsive set of exons. For the splicing code analysis we used AVISPA (Barash et al. 2013) as we have done previously to identify known and novel regulators of alternative splicing (Gazzara et al. 2014; Sotillo et al. 2015). For conservation analysis, we used conservation scores extracted by AVISPA that uses the phastCons46way, placental mammal track (human) or phastCons60way (mouse). The conservation of RBFOX motifs was calculated as the average conservation score of the core GCAUG motif. Highly conserved RBFOX motifs were defined as those with scores of 1.0 for all nucleotides of the core motif as defined by the phastCons tracks described above.

*CLIP-Seq analysis*

For eCLIP and iCLIP data we downloaded all hg19 bed narrowPeak files from the ENCODE Portal (www.encodeproject.org) that were available as of October 2016 (Sundararaman et al. 2016). We processed additional publically available CLIP-Seq datasets in human and mouse (summarized with accession numbers in Supplemental Table S6) using the same pipeline described for eCLIP data processing (Van Nostrand et al. 2016) that is used by ENCODE. Peaks called on replicate experiments were merged for downstream analysis. We defined high confidence RBFOX2 peaks as those that contained the [U]GCAUG consensus motif within the boundary of the peak coordinates in any of the four cell types.

To determine enriched CLIP features, a two-tailed Fisher’s exact test was used to call significant differences between peak occurrence in regulated versus unresponsive sets of exons. For RNA maps, the fraction of events in each set of regulated or unresponsive exons with a CLIP peak was plotted for each position within 300 nucleotides of the cassette exons and the first and last 50 nucleotides of the cassette exon itself.

*Identification of ancient co-regulated orthologs*

To identify genes display ancient conservation putative CELF/RBFOX co-regulated events we first defined cassette exons regulated by CELF family members in chicken, fly, and worm with |E(ΔΨ)| > 10%. Exons were considered to be putatively co-regulated if they contained a RBFOX [U]GCAUG motif within the alternative exon or 300 nt upstream or downstream. We retrieved all mammalian orthologs for genes containing event(s) that met these criteria using DIPOT (Hu et al. 2011).

We next defined mammalian genes containing co-regulated events. These were found by taking all cassette exons that changed upon over expression of CELF1 or CELF2 in mouse muscle or heart or upon knockdown of CELF2 in human JSL1 cells (|E(ΔΨ)| > 20%) that also contained a GCAUG motif within 300 nt of the exon. Additionally we took LSVs that were significantly changing in both a mouse CELF OE experiment and upon Rbfox2 depletion in myoblasts or myotubes. These gene sets were then intersected to obtain genes with putative co-regulation by the CELF and RBFOX families in mammals and lower organisms.

*Differential splicing analysis with MAJIQ*

To quantify splicing changes in all datasets we utilized MAJIQ and VOILA (Vaquero-Garcia et al. 2016). These tools define, quantify, and visualize splicing events in terms of Local Splicing Variations (LSVs), which are defined as two or more splice junctions that emanate out of a reference exon (source LSV) or converge into a reference exon (target LSV). Thus LSVs capture both classical alternative splicing events, as well as more complex splicing patterns with more than two splice junctions. MAJIQ quantifies the Percent Selected Index (PSI) for each junction in each LSV within conditions and changes in PSI between conditions (delta PSI or dPSI). Significant splicing changes in this study were defined as those with at least one junction that has a change in expected inclusion (E(dPSI)) of greater than 20% in either direction. High-confidence changes were those LSVs that had at least one junction with a probability of |dPSI| > 20% > 95% (Vaquero-Garcia et al. 2016). This information was parsed from the VOILA dPSI tab separated file output that was generated by using the options “--show-all” to display all LSVs that were reliable and quantifiable in the two conditions compared, and “--threshold 0.2” to calculate the probability |dPSI| > 20% for every junction.

*Definition of cassette exons*

The LSV formulation does not directly classify cassette exon type splicing events, but instead considers evidence from both sides of a putative cassette exon and quantifies them separately. This means a cassette exon would correspond to a single source LSV (consisting of an inclusion junction (between the 5’ss of source reference exon and the 3’ss of the alternative exon) and an exclusion junction) and a matched single target LSV (consisting of the same exclusion junction and a different inclusion junction (between the 5’ss of the same alternative exon and the 3’ss of the target reference exon). Therefore, we classified cassette exons by combining evidence from single source and single target LSVs.

For a cassette exon to be considered regulated we first required at least one “side” of the event (either source or target LSV) to have an inclusion and exclusion junction changing with |E(dPSI)| > 20%. Next we required a matched LSV (shared exclusion junction and inclusion junction that points to the same alternative exon) to be detected in the RNA-seq data and be quantified by MAJIQ with appreciable inclusion levels for both junctions (PSI > 5%) in at least one of the two conditions being compared. For complex LSVs (i.e. more than two junctions), only the top two most changing junctions were considered in defining cassette exons. High-confidence cassette exons were those that contained at least one junction with a probability of |dPSI| > 20% > 95%. Cassette exons were considered to be repressed by a splicing factor if dPSI for the inclusive junction was positive upon knockdown or knockout (i.e. inclusion increased upon depletion) or negative upon overexpression. Cassette exons were considered to be enhanced by a splicing factor if the inclusive junction had a negative dPSI upon depletion or a positive dPSI upon overexpression.

MAJIQ uses a prior that is biased towards dPSI values centered around zero to reduce false positives due to fluctuations in small read counts (Vaquero-Garcia et al. 2016), meaning small dPSI values are pushed towards zero. Therefore, to define unresponsive cassette exons with high confidence we first removed the dPSI prior and recalculated dPSIs for all binary LSVs. Unresponsive LSVs were thus defined as those with |dPSI| < 3% with a probability of greater than 95%. Unresponsive cassette exons were defined as those that met the this criteria for both the source and matched target LSVs.

*Comparison of splicing changes*

To compare splicing changes across different experiments that were measured by RNA-seq (e.g. CELF2 knockdown in unstimulated versus stimulated JSL1 cells; Celf2 overexpression in heart versus Rbfox2 knockdown in myotubes) we ran MAJIQ builder (Vaquero-Garcia et al. 2016) on all experiments in a single run. This ensured all LSV IDs and junctions, including de novo junctions detected in the data, would be identical in any given dPSI comparison. LSVs were considered co-regulated in two conditions if they both contained at least one junction with |E(dPSI)| > 20%. Correlation plots were made by taking all co-regulated LSVs and comparing E(dPSI) values for every junction in comparison one compared to comparison two. LSVs were considered regulated in the same direction if the junction that showed the highest absolute change in E(dPSI) was changing in the same direction in both comparisons.

Mice with a conditional heart knockout of Rbfox2 have yet to be described using RNA-seq. To make a direct comparison of exons co-regulated by Rbfox2 versus the CELF family or other splicing factors in the heart, we utilized available data from Rbfox2 knockout mice generated from a targeted sequencing approach, RASL-seq, that uses junction-spanning oligos to query around 5000 binary splicing changes (Li et al. 2012). We defined Rbfox2 regulated events as those that had an average |dPSI| > 10% with p-value < 0.05 (Student’s t-test) between three replicate wildtype versus knockout mice for at least two of the three timepoints tested (Wei et al. 2015). For all Rbfox2 regulated events we next matched the inclusion and exclusion junctions queried by RASL-seq to LSVs defined by MAJIQ from RNA-seq data upon CELF overexpression or splice factor knockout in heart. Events were considered co-regulated if both the matched inclusion and exclusion junction in the LSV changed with E(dPSI) > 10% in opposite directions. Events were considered regulated in the same direction if the inclusive junction changed in the same direction according to RASL-seq and RNA-seq.

*Motif and splicing code analysis*

For motif enrichment we first defined splicing relevant regions for all responsive and unresponsive cassette exons. There regions were defined as: the upstream constitutive exon (C1); within 300 nt downstream of the 5’ss of C1; the alternative exon (A); within 300 nt upstream of the 3’ss of A; within 300 nt downstream of the 5’ss of A; the downstream constitutive exon (C2); and within 300 nt upstream of the 3’ss of C2 (Barash et al. 2010a; Barash et al. 2013). Counts for all 1024 possible pentamers were obtained for each of these regions and a hypergeometric test was applied to obtain significant differences in the presence or absence of a pentamer in a specific region in a regulated versus unresponsive set of exons.

For the splicing code analysis we used AVISPA (Barash et al. 2013) which has been used previously to predict known and novel regulators of alternative splicing (Gazzara et al. 2014; Sotillo et al. 2015). Given the coordinates of a cassette exon triplet (C1, A, and C2, defined above), AVISPA extracts a feature set of >1400 features (e.g. motifs, conservation, secondary structure, etc.) form the splicing relevant regions described above and uses an ensemble of splicing code models to predict if an exon is alternative, if it exhibits tissue-specific splicing, and score which motifs were most important in determining splicing outcome (Barash et al. 2013). We ran AVISPA on all cassette exons that were CELF2 repressed, CELF2 enhanced, or unresponsive to CELF2 depletion in JSL1 cells. From this output we extracted the normalized feature effect (NFE) for the Alternative vs. Constitutive splicing prediction stage for all exons that contained RBFOX family [U]GCAUG motif downstream and plotted these values as a CDF. Briefly, this NFE score is calculated by AVISPA through *in silico* removal of each of the most informative features individually and measuring the change in splicing prediction outcome upon removal, compared to the wild type sequence (the feature effect, FE). The NFE is computed by normalizing each feature effect by the total feature effects for all motifs evaluated. Therefore, higher NFE scores are associated with motifs that are more highly weighted by the splicing code models and are thus more likely to affect splicing outcomes.

For conservation analysis, we used conservation scores extracted by AVISPA that uses the phastCons46way, placental mammal track (human) or phastCons60way (mouse). The conservation of RBFOX motifs was calculated as the average conservation score of the core GCAUG motif. Perfectly conserved RBFOX motifs were defined as those with scores of 1.0 for all nucleotides.

*CLIP-seq analysis*

For eCLIP and iCLIP data we downloaded all hg19 bed narrowPeak files from the ENCODE Portal (www.encodeproject.org) that were available as of October 2016 (Sundararaman et al. 2016). This amounted to peaks from 89 RBPs from K562 cells and 70 RBPs from HepG2 cells with two replicates for each RBP. In addition to data in HepG2 and K562 cells, we downloaded RBFOX2 eCLIP peaks from HEK293 cells (Van Nostrand et al. 2016) and H1ES cells (Conway et al. 2016) from GEO (under accessions GSE77629 and GSE78507) that were called using the same processing pipeline. Peaks called on replicate experiments were merged for downstream analysis. We defined high confidence RBFOX2 peaks as those that contained the [U]GCAUG consensus motif within the boundary of the peak coordinates in any of the four cell types.

We processed additional publically available CLIP-seq datasets in human and mouse (summarized with accession numbers in Supplemental Table S3) using the same pipeline described for eCLIP data processing (Van Nostrand et al. 2016) that is used by ENCODE. Briefly, FastQC was run and adaptor and overrepresented sequences were removed using Cutadapt. We removed reads that mapped to repetitive elements by mapping with STAR to custom human or mouse versions of RepBase. The remaining reads were then mapped to hg19 (human) or mm10 (mouse) using STAR to obtain uniquely mapped reads. Reads that shared identical start and end coordinates were collapsed to remove PCR duplicates and peaks were called using the CLIPper algorithm (Lovci et al. 2013).

To determine enriched CLIP features, first all CLIP peak coordinates (hg19 or mm10) were matched to splicing-relevant regions around regulated and non-regulated cassette exon sets (defined above). Occurrences of CLIP peaks were counted in each of these regions and a two-tailed Fisher’s exact test was used to call significant differences between peak occurrence in regulated versus unresponsive sets of exons. For RNA maps, each position in each event in the given set of regulated or unresponsive exons was checked for the occurrence of a CLIP peak. The fraction of events in each set with a CLIP peak was plotted for each position within 300 nucleotides of the cassette exons and the first and last 50 nucleotides of the cassette exon itself.

**References**

Barash Y, Blencowe BJ, Frey BJ. 2010a. Model-based detection of alternative splicing signals. *Bioinformatics* **26**: i325-333.

Barash Y, Calarco JA, Gao W, Pan Q, Wang X, Shai O, Blencowe BJ, Frey BJ. 2010b. Deciphering the splicing code. *Nature* **465**: 53-59.

Barash Y, Vaquero-Garcia J, Gonzalez-Vallinas J, Xiong HY, Gao W, Lee LJ, Frey BJ. 2013. AVISPA: a web tool for the prediction and analysis of alternative splicing. *Genome Biol* **14**: R114.

Conway AE, Van Nostrand EL, Pratt GA, Aigner S, Wilbert ML, Sundararaman B, Freese P, Lambert NJ, Sathe S, Liang TY et al. 2016. Enhanced CLIP Uncovers IMP Protein-RNA Targets in Human Pluripotent Stem Cells Important for Cell Adhesion and Survival. *Cell Rep* **15**: 666-679.

Dobin A, Davis CA, Schlesinger F, Drenkow J, Zleski C, Jha S, Batut P, Chaisson M, Gingeras TR. 2013. STAR: ultrafast universla RNA-seq aligner. *Bioinformatics* **29**(1):15-21.

Gazzara MR, Vaquero-Garcia J, Lynch KW, Barash Y. 2014. In silico to in vivo splicing analysis using splicing code models. *Methods* **67**: 3-12.

Hu Y, Flockhart I, Vinayagam A, Bergwitz C, Berger B, Perrimon N, Mohr SE. 2011. An integrative approach to ortholog prediction for disease-focused and other functional studies. *BMC Bioinformatics* **12**: 357.

Li H, Qiu J, Fu XD. 2012. RASL-seq for massively parallel and quantitative analysis of gene expression. *Curr Protoc Mol Biol* **Chapter 4**: Unit 4 13 11-19.

Lovci MT, Ghanem D, Marr H, Arnold J, Gee S, Parra M, Liang TY, Stark TJ, Gehman LT, Hoon S et al. 2013. Rbfox proteins regulate alternative mRNA splicing through evolutionarily conserved RNA bridges. *Nat Struct Mol Biol* **20**: 1434-1442.

Lynch KW, Weiss A. 2000. A model system for the activation-induced alternative-splicing of CD45 implicates protein kinase C and Ras. *Mol Cell Biol* **20**: 70-80.

Melton AA, Jackson J, Wang J, Lynch KW. 2007. Combinatorial control of signal-induced exon repression by hnRNP L and PSF. *Mol Cell Biol* **27**: 6972-6984.

Rothrock C, Cannon B, Hahm B, Lynch KW. 2003. A conserved signal-responsive sequence mediates activation-induced alternative splicing of CD45. *Mol Cell* **12**: 1317-1324.

Sotillo E, Barrett DM, Black KL, Bagashev A, Oldridge D, Wu G, Sussman R, Lanauze C, Ruella M, Gazzara MR et al. 2015. Convergence of Acquired Mutations and Alternative Splicing of CD19 Enables Resistance to CART-19 Immunotherapy. *Cancer Discov* **5**: 1282-1295.

Sundararaman B, Zhan L, Blue SM, Stanton R, Elkins K, Olson S, Wei X, Van Nostrand EL, Pratt GA, Huelga SC et al. 2016. Resources for the Comprehensive Discovery of Functional RNA Elements. *Mol Cell* **61**: 903-913.

Van Nostrand EL, Pratt GA, Shishkin AA, Gelboin-Burkhart C, Fang MY, Sundararaman B, Blue SM, Nguyen TB, Surka C, Elkins K et al. 2016. Robust transcriptome-wide discovery of RNA-binding protein binding sites with enhanced CLIP (eCLIP). *Nat Methods* **13**: 508-514.

Vaquero-Garcia J, Barrera A, Gazzara MR, Gonzalez-Vallinas J, Lahens NF, Hogenesch JB, Lynch KW, Barash Y. 2016. A new view of transcriptome complexity and regulation through the lens of local splicing variations. *Elife* **5**: e11752.
