# Supplementary material for: Ancient antagonism between CELF and RBFOX families tunes mRNA splicing outcomes
Source: HighWire-hosted journal article supplement (doi:10.1101/gr.220517.117), 2017-05-16
Supplement: Supplemental_Table_S1.xlsx [file Supplemental_Table_S1.xlsx]

## Sheet: LEGEND
Supplemental Table S1: Coordinates for high confidence cassette exons that were CELF2-repressed, CELF2-enhanced, or unresponsive to depletion.

## Sheet: CELF2 repressed
#GeneName	EnsemblID	chromsome	strand	C1start	C1end	Astart	Aend	C2start	C2end	LSV1	LSV2
TRA2A	ENSG00000164548	chr7	-	23571407	23571660	23570799	23570889	23561739	23562051	ENSG00000164548:23561740-23562051:source	ENSG00000164548:23571408-23571660:target
FAM221A	ENSG00000188732	chr7	+	23731008	23731215	23737810	23737918	23740404	23740487	ENSG00000188732:23740405-23740487:target	ENSG00000188732:23731009-23731215:source
NOD1	ENSG00000106100	chr7	-	30485756	30485840	30477188	30477272	30475613	30475697	ENSG00000106100:30485757-30485840:target	ENSG00000106100:30475614-30475697:source
GGCT	ENSG00000006625	chr7	-	30544184	30544460	30540151	30540297	30538418	30538554	ENSG00000006625:30544185-30544460:target	ENSG00000006625:30538419-30538554:source
ZNF138	ENSG00000197008	chr7	+	64254765	64254949	64275295	64275422	64291828	64293828	ENSG00000197008:64291829-64294054:target	ENSG00000197008:64254766-64254949:source
PMS2P5	ENSG00000123965	chr7	+	74312262	74312349	74312515	74312628	74313767	74313871	ENSG00000123965:74312263-74312349:source	ENSG00000123965:74313768-74313871:target
DMTF1	ENSG00000135164	chr7	+	86781676	86781871	86783705	86783844	86792810	86792933	ENSG00000135164:86792811-86792933:target	ENSG00000135164:86781677-86781871:source
DYNC1I1	ENSG00000158560	chr7	+	95442507	95442649	95457368	95457428	95499194	95499310	ENSG00000158560:95499195-95499310:target	ENSG00000158560:95442508-95442649:source
AGAP3	ENSG00000133612	chr7	+	150817073	150817232	150817606	150817832	150819811	150819965	ENSG00000133612:150819812-150819965:target	ENSG00000133612:150817074-150817232:source
GPCPD1	ENSG00000125772	chr20	-	5573972	5574057	5566839	5566915	5564926	5564968	ENSG00000125772:5573973-5574057:target	ENSG00000125772:5564927-5566683:source
EPB41L1	ENSG00000088367	chr20	+	34785780	34785963	34797409	34797820	34800193	34800298	ENSG00000088367:34800194-34800298:target	ENSG00000088367:34785781-34785963:source
NCOA5	ENSG00000124160	chr20	-	44718455	44718591	44708025	44708092	44698848	44699175	ENSG00000124160:44698849-44699175:source	ENSG00000124160:44718456-44718591:target
ZMYND8	ENSG00000101040	chr20	-	45848908	45848975	45841286	45841370	45837858	45839542	ENSG00000101040:45837859-45839542:source	ENSG00000101040:45848909-45848975:target
LSM14B	ENSG00000149657	chr20	+	60701281	60701495	60702640	60702757	60704840	60705008	ENSG00000149657:60701282-60701495:source	ENSG00000149657:60704841-60705008:target
TEP1	ENSG00000129566	chr14	-	20841169	20841306	20840891	20841016	20839647	20839791	ENSG00000129566:20839648-20839791:source	ENSG00000129566:20841170-20841306:target
PPP1R3E	ENSG00000235194	chr14	-	23769966	23770149	23769315	23769348	23768609	23768750	ENSG00000235194:23769967-23770149:target	ENSG00000235194:23768610-23768750:source
RALGAPA1	ENSG00000174373	chr14	-	36159041	36159209	36157664	36157746	36155747	36155872	ENSG00000174373:36155748-36155872:source	ENSG00000174373:36158740-36159209:target
POLE2	ENSG00000100479	chr14	-	50121722	50121812	50121501	50121556	50120872	50120932	ENSG00000100479:50120873-50121181:source	ENSG00000100479:50121723-50121812:target
POLE2	ENSG00000100479	chr14	-	50146442	50146518	50141067	50141145	50140840	50140934	ENSG00000100479:50140841-50140934:source	ENSG00000100479:50146192-50146518:target
NIN	ENSG00000100503	chr14	-	51226574	51227077	51223209	51225348	51221459	51221585	ENSG00000100503:51226575-51227077:target	ENSG00000100503:51221460-51221585:source
TMEM260	ENSG00000070269	chr14	+	57082168	57082745	57083900	57084015	57085311	57085481	ENSG00000070269:57085312-57085481:target	ENSG00000070269:57082169-57082982:source
TMEM260	ENSG00000070269	chr14	+	57085311	57085481	57088248	57088420	57092099	57092248	ENSG00000070269:57085312-57085481:source	ENSG00000070269:57092100-57092248:target
C14orf39	ENSG00000179008	chr14	-	60951598	60951655	60950624	60950732	60950408	60950535	ENSG00000179008:60951599-60951655:target	ENSG00000179008:60950409-60950535:source
MNAT1	ENSG00000020426	chr14	+	61346431	61346553	61434946	61435115	61435276	61436671	ENSG00000020426:61435277-61436671:target	ENSG00000020426:61346432-61346759:source
RP11-488C13.5	ENSG00000258301	chr14	-	77252427	77253067	77250035	77250194	77248082	77249119	ENSG00000258301:77248083-77249119:source	ENSG00000258301:77252428-77253067:target
TTC8	ENSG00000165533	chr14	+	89307380	89307540	89307768	89307858	89310149	89310194	ENSG00000165533:89310150-89310194:target	ENSG00000165533:89307381-89307540:source
TTC8	ENSG00000165533	chr14	+	89338673	89338796	89341369	89341453	89343637	89344335	ENSG00000165533:89338674-89338796:source	ENSG00000165533:89343638-89344335:target
TRAF3	ENSG00000131323	chr14	+	103352525	103352606	103355896	103355971	103357661	103357754	ENSG00000131323:103357662-103357754:target	ENSG00000131323:103352526-103352606:source
MARK3	ENSG00000075413	chr14	+	103957875	103958371	103964838	103964865	103966492	103966537	ENSG00000075413:103965202-103966537:target	ENSG00000075413:103957876-103958371:source
INF2	ENSG00000203485	chr14	+	105180539	105181193	105181620	105181677	105185131	105185942	ENSG00000203485:105185132-105185942:target	ENSG00000203485:105180540-105181193:source
BRF1	ENSG00000185024	chr14	-	105718843	105718916	105707601	105707751	105695156	105695250	ENSG00000185024:105718844-105718916:target	ENSG00000185024:105695157-105695250:source
C14orf80	ENSG00000185347	chr14	+	105960171	105960270	105962216	105962423	105963693	105963994	ENSG00000185347:105960172-105960270:source	ENSG00000185347:105963694-105963994:target
MICAL3	ENSG00000243156	chr22	-	18291609	18291703	18286576	18286627	18273967	18274067	ENSG00000243156:18291610-18291703:target	ENSG00000243156:18273968-18274433:source
MICAL3	ENSG00000243156	chr22	-	18314619	18314873	18309219	18309282	18305712	18305826	ENSG00000243156:18314620-18314873:target	ENSG00000243156:18305713-18305826:source
NF2	ENSG00000186575	chr22	+	30077427	30077590	30079008	30079053	30090740	30092740	ENSG00000186575:30090741-30094587:target	ENSG00000186575:30077428-30077590:source
USP9Y	ENSG00000114374	chrY	+	14821320	14821476	14826571	14826722	14832521	14833136	ENSG00000114374:14832522-14833136:target	ENSG00000114374:14821321-14821476:source
ZDHHC2	ENSG00000104219	chr8	+	17063163	17063284	17065468	17065601	17067440	17067694	ENSG00000104219:17067441-17067694:target	ENSG00000104219:17063164-17063284:source
PTK2B	ENSG00000120899	chr8	+	27301722	27301788	27303310	27303436	27308265	27308412	ENSG00000120899:27308266-27308412:target	ENSG00000120899:27301723-27301788:source
HMBOX1	ENSG00000147421	chr8	+	28902877	28902960	28903708	28903933	28904874	28904970	ENSG00000147421:28904875-28904970:target	ENSG00000147421:28902878-28902960:source
HGSNAT	ENSG00000165102	chr8	+	43027452	43027529	43028855	43028886	43033216	43033377	ENSG00000165102:43033217-43033377:target	ENSG00000165102:43027453-43027529:source
PCMTD1	ENSG00000168300	chr8	-	52758220	52758323	52752006	52752198	52746077	52746249	ENSG00000168300:52746078-52746249:source	ENSG00000168300:52757369-52758323:target
TCEA1	ENSG00000187735	chr8	-	54934622	54934825	54922989	54923052	54912184	54912610	ENSG00000187735:54912185-54912610:source	ENSG00000187735:54934623-54934825:target
CSPP1	ENSG00000104218	chr8	+	68049690	68049838	68062017	68062170	68066258	68066371	ENSG00000104218:68066259-68066371:target	ENSG00000104218:68049691-68049838:source
TBC1D31	ENSG00000156787	chr8	+	124138747	124138927	124140520	124140753	124141309	124141458	ENSG00000156787:124138748-124138927:source	ENSG00000156787:124141306-124141458:target
KDM4B	ENSG00000127663	chr19	+	5110632	5110829	5119128	5119230	5119663	5119863	ENSG00000127663:5110633-5110829:source	ENSG00000127663:5119664-5119863:target
MAP2K7	ENSG00000076984	chr19	+	7968727	7968953	7970692	7970740	7974639	7974781	ENSG00000076984:7968728-7968953:source	ENSG00000076984:7974640-7974781:target
DNM2	ENSG00000079805	chr19	+	10906047	10906115	10906736	10906875	10908055	10908194	ENSG00000079805:10908056-10908194:target	ENSG00000079805:10906048-10906422:source
MYO9B	ENSG00000099331	chr19	+	17320394	17320518	17321141	17321189	17321523	17321661	ENSG00000099331:17321252-17321661:target	ENSG00000099331:17320395-17320518:source
DPY19L3	ENSG00000178904	chr19	+	32955633	32955690	32959636	32959719	32968427	32968560	ENSG00000178904:32955634-32955690:source	ENSG00000178904:32968389-32968560:target
U2AF1L4	ENSG00000161265	chr19	-	36235526	36235561	36235391	36235441	36235223	36235322	ENSG00000161265:36235527-36235561:target	ENSG00000161265:36235224-36235322:source
GEMIN7	ENSG00000142252	chr19	+	45582452	45582635	45583164	45583287	45593364	45594782	ENSG00000142252:45582453-45582635:source	ENSG00000142252:45593365-45594782:target
BCAT2	ENSG00000105552	chr19	-	49314240	49314286	49311012	49311493	49310256	49310331	ENSG00000105552:49310257-49310331:source	ENSG00000105552:49314241-49314286:target
PLEKHA4	ENSG00000105559	chr19	-	49362458	49362639	49362116	49362396	49360678	49360753	ENSG00000105559:49360679-49360753:source	ENSG00000105559:49362459-49362639:target
ZNF584	ENSG00000171574	chr19	+	58919991	58920532	58921372	58921458	58926890	58926919	ENSG00000171574:58919992-58920573:source	ENSG00000171574:58926891-58926919:target
ATAD3B	ENSG00000160072	chr1	+	1424583	1424654	1425071	1425191	1425636	1425804	ENSG00000160072:1425637-1425804:target	ENSG00000160072:1424584-1424654:source
C1orf86	ENSG00000162585	chr1	-	2125077	2125349	2124283	2124414	2120982	2121220	ENSG00000162585:2125078-2125349:target	ENSG00000162585:2120983-2121220:source
CLSTN1	ENSG00000171603	chr1	-	9801151	9801314	9797555	9797612	9795942	9796100	ENSG00000171603:9795943-9796100:source	ENSG00000171603:9801152-9801314:target
CLSTN1	ENSG00000171603	chr1	-	9833329	9833452	9816538	9816568	9815171	9815367	ENSG00000171603:9833330-9833452:target	ENSG00000171603:9815172-9815367:source
PLEKHM2	ENSG00000116786	chr1	+	16046228	16046415	16047823	16047883	16051811	16052040	ENSG00000116786:16051812-16052040:target	ENSG00000116786:16046229-16046415:source
EYA3	ENSG00000158161	chr1	-	28415034	28415207	28406842	28406962	28384504	28384605	ENSG00000158161:28384505-28384605:source	ENSG00000158161:28415035-28415207:target
EPB41	ENSG00000159023	chr1	+	29379615	29379824	29386933	29386996	29391493	29391733	ENSG00000159023:29391469-29391733:target	ENSG00000159023:29379616-29379824:source
PHC2	ENSG00000134686	chr1	-	33815197	33815486	33800766	33800960	33799690	33799893	ENSG00000134686:33799691-33799893:source	ENSG00000134686:33815198-33815486:target
MACF1	ENSG00000127603	chr1	+	39838150	39838268	39844132	39844195	39844874	39845116	ENSG00000127603:39844875-39845116:target	ENSG00000127603:39838151-39839145:source
HIVEP3	ENSG00000127124	chr1	-	42041214	42041360	41990405	41990581	41984072	41984159	ENSG00000127124:41984073-41984159:source	ENSG00000127124:42041215-42041360:target
MAST2	ENSG00000086015	chr1	+	46463395	46463471	46466630	46466651	46468476	46468555	ENSG00000086015:46463396-46463471:source	ENSG00000086015:46468477-46468555:target
STIL	ENSG00000123473	chr1	-	47779707	47779819	47778619	47778986	47775947	47776034	ENSG00000123473:47775948-47776034:source	ENSG00000123473:47779708-47779819:target
LRP8	ENSG00000157193	chr1	-	53741302	53741425	53738275	53738314	53736898	53737018	ENSG00000157193:53741303-53741425:target	ENSG00000157193:53736899-53737018:source
DOCK7	ENSG00000116641	chr1	-	63018402	63018572	63010617	63010710	63009326	63009416	ENSG00000116641:63018403-63018572:target	ENSG00000116641:63009327-63009416:source
CRYZ	ENSG00000116791	chr1	-	75175781	75175931	75172786	75172888	75172582	75172678	ENSG00000116791:75175782-75175931:target	ENSG00000116791:75172583-75172678:source
CCBL2	ENSG00000137944	chr1	-	89458267	89458459	89453934	89454034	89435091	89435150	ENSG00000137944:89435092-89435150:source	ENSG00000137944:89458268-89458459:target
ZNF326	ENSG00000162664	chr1	+	90470691	90470803	90472903	90473309	90475646	90475845	ENSG00000162664:90470692-90472008:source	ENSG00000162664:90475647-90475845:target
RP4-665J23.1	ENSG00000233593	chr1	-	91317039	91317207	91303106	91303322	91295753	91297753	ENSG00000233593:91295104-91297753:source	ENSG00000233593:91317040-91317207:target
PTBP2	ENSG00000117569	chr1	+	97270340	97270495	97271974	97272008	97272421	97272514	ENSG00000117569:97272367-97272514:target	ENSG00000117569:97270341-97270495:source
ATXN7L2	ENSG00000162650	chr1	+	110026100	110026702	110027388	110027453	110028678	110028744	ENSG00000162650:110026101-110026702:source	ENSG00000162650:110028168-110028744:target
RPRD2	ENSG00000163125	chr1	+	150413398	150413499	150414356	150414434	150415706	150415759	ENSG00000163125:150415707-150415759:target	ENSG00000163125:150413399-150414099:source
UAP1	ENSG00000117143	chr1	+	162560112	162560301	162562521	162562572	162567581	162567648	ENSG00000117143:162567031-162567648:target	ENSG00000117143:162560113-162560305:source
MPZL1	ENSG00000197965	chr1	+	167742472	167742605	167745300	167745403	167757056	167759056	ENSG00000197965:167757057-167761156:target	ENSG00000197965:167742473-167743146:source
FLVCR1	ENSG00000162769	chr1	+	213031596	213032532	213037066	213037211	213046019	213046160	ENSG00000162769:213031597-213032532:source	ENSG00000162769:213046020-213046160:target
ZNF678	ENSG00000181450	chr1	+	227751243	227751425	227770214	227770307	227834244	227834371	ENSG00000181450:227751244-227751425:source	ENSG00000181450:227834245-227834371:target
ZNF678	ENSG00000181450	chr1	+	227834244	227834371	227838656	227838777	227842036	227844036	ENSG00000181450:227834245-227834371:source	ENSG00000181450:227842037-227850162:target
PCNXL2	ENSG00000135749	chr1	-	233372590	233372726	233362971	233363117	233353776	233353930	ENSG00000135749:233372591-233372726:target	ENSG00000135749:233353777-233353930:source
SDCCAG8	ENSG00000054282	chr1	+	243449573	243449699	243456392	243456521	243468014	243468079	ENSG00000054282:243449574-243449699:source	ENSG00000054282:243468015-243468079:target
SDCCAG8	ENSG00000054282	chr1	+	243456392	243456521	243456700	243456796	243468014	243468079	ENSG00000054282:243456393-243456521:source	ENSG00000054282:243468015-243468079:target
ZNF195	ENSG00000005801	chr11	-	3392204	3392377	3382972	3383119	3379795	3381795	ENSG00000005801:3379157-3381795:source	ENSG00000005801:3392173-3392377:target
HPS5	ENSG00000110756	chr11	-	18343492	18343635	18339297	18339454	18333063	18333571	ENSG00000110756:18333064-18333571:source	ENSG00000110756:18343493-18343635:target
LIN7C	ENSG00000148943	chr11	-	27528262	27528320	27527863	27528002	27523348	27523467	ENSG00000148943:27523349-27523467:source	ENSG00000148943:27528263-27528320:target
CELF1	ENSG00000149187	chr11	-	47574543	47574669	47522412	47522484	47521004	47521156	ENSG00000149187:47521005-47521315:source	ENSG00000149187:47574544-47574669:target
GANAB	ENSG00000089597	chr11	-	62402292	62402472	62401781	62401847	62400912	62400986	ENSG00000089597:62400913-62401402:source	ENSG00000089597:62402043-62402472:target
C11orf80	ENSG00000173715	chr11	+	66555630	66555740	66563751	66563835	66568111	66568167	ENSG00000173715:66555631-66555744:source	ENSG00000173715:66568112-66568167:target
CTTN	ENSG00000085733	chr11	+	70266491	70266616	70267575	70267686	70269045	70269101	ENSG00000085733:70266492-70266616:source	ENSG00000085733:70269046-70269101:target
NADSYN1	ENSG00000172890	chr11	+	71169473	71169590	71171086	71171259	71171767	71171993	ENSG00000172890:71171768-71171993:target	ENSG00000172890:71169474-71170102:source
NUMA1	ENSG00000137497	chr11	-	71723940	71725082	71723446	71723488	71721831	71721900	ENSG00000137497:71721832-71721900:source	ENSG00000137497:71723941-71725082:target
TMEM126A	ENSG00000171202	chr11	+	85359010	85359133	85361292	85361385	85365106	85365300	ENSG00000171202:85365085-85365300:target	ENSG00000171202:85359011-85359133:source
PICALM	ENSG00000073921	chr11	-	85692171	85692271	85689112	85689136	85687665	85687725	ENSG00000073921:85687666-85688048:source	ENSG00000073921:85692172-85692271:target
ALKBH8	ENSG00000137760	chr11	-	107422533	107422638	107420478	107420549	107403025	107403132	ENSG00000137760:107422534-107422638:target	ENSG00000137760:107403026-107403132:source
C11orf1	ENSG00000137720	chr11	+	111753091	111753322	111753859	111753926	111754494	111756494	ENSG00000137720:111753092-111753322:source	ENSG00000137720:111754495-111756699:target
PTS	ENSG00000150787	chr11	+	112099316	112099396	112100930	112100953	112101348	112101405	ENSG00000150787:112099317-112100227:source	ENSG00000150787:112100989-112101405:target
NCAM1	ENSG00000149294	chr11	+	113085090	113085233	113092017	113092047	113102366	113102517	ENSG00000149294:113102102-113102517:target	ENSG00000149294:113085091-113085233:source
SIK3	ENSG00000160584	chr11	-	116741046	116741117	116738661	116738805	116734383	116734534	ENSG00000160584:116741047-116741117:target	ENSG00000160584:116734384-116735784:source
RPP40	ENSG00000124787	chr6	-	5000042	5000138	4998949	4999075	4996455	4996654	ENSG00000124787:4996456-4996654:source	ENSG00000124787:5000043-5000138:target
ZKSCAN3	ENSG00000189298	chr6	+	28317690	28317844	28318048	28318165	28327301	28327778	ENSG00000189298:28327302-28327778:target	ENSG00000189298:28317691-28317844:source
TRIM26	ENSG00000234127	chr6	-	30181081	30181204	30168811	30168915	30166442	30166930	ENSG00000234127:30181082-30181204:target	ENSG00000234127:30166443-30167041:source
EHMT2	ENSG00000204371	chr6	-	31864039	31864293	31861138	31861439	31860602	31860687	ENSG00000204371:31863178-31864293:target	ENSG00000204371:31860603-31860963:source
CNPY3	ENSG00000137161	chr6	+	42897584	42897649	42898355	42898499	42902212	42902336	ENSG00000137161:42897585-42897649:source	ENSG00000137161:42902116-42902336:target
DST	ENSG00000151914	chr6	-	56334680	56334755	56333779	56333797	56330875	56330993	ENSG00000151914:56334663-56334755:target	ENSG00000151914:56330876-56330993:source
FBXL4	ENSG00000112234	chr6	-	99395681	99395849	99382637	99382755	99375580	99375698	ENSG00000112234:99375581-99375698:source	ENSG00000112234:99395682-99395849:target
COQ3	ENSG00000132423	chr6	-	99831573	99831700	99830883	99831006	99828064	99828217	ENSG00000132423:99828065-99828217:source	ENSG00000132423:99831574-99831700:target
C6orf203	ENSG00000130349	chr6	+	107349406	107349475	107351228	107351311	107360952	107361434	ENSG00000130349:107360953-107361434:target	ENSG00000130349:107349407-107350128:source
FYN	ENSG00000010810	chr6	-	112024087	112024189	112021306	112021471	112020717	112020873	ENSG00000010810:112023619-112024189:target	ENSG00000010810:112020718-112020873:source
RNF146	ENSG00000118518	chr6	+	127601375	127601485	127603431	127603540	127607194	127607496	ENSG00000118518:127607195-127607496:target	ENSG00000118518:127601376-127601485:source
MAP7	ENSG00000135525	chr6	-	136709530	136709648	136704808	136704919	136698892	136699006	ENSG00000135525:136698893-136699006:source	ENSG00000135525:136709531-136709648:target
SYNE1	ENSG00000131018	chr6	-	152453256	152453349	152451854	152451913	152442818	152443811	ENSG00000131018:152442819-152443811:source	ENSG00000131018:152453257-152453349:target
SYNE1	ENSG00000131018	chr6	-	152469179	152469513	152466621	152466690	152464757	152464900	ENSG00000131018:152464758-152464900:source	ENSG00000131018:152469019-152469513:target
ARID1B	ENSG00000049618	chr6	+	157495141	157495251	157495980	157496139	157502102	157502332	ENSG00000049618:157495142-157495251:source	ENSG00000049618:157502103-157502332:target
CTNS	ENSG00000040531	chr17	+	3550737	3550816	3552140	3552225	3558291	3558395	ENSG00000040531:3558292-3558395:target	ENSG00000040531:3550738-3550898:source
NDEL1	ENSG00000166579	chr17	+	8363326	8363478	8366637	8366672	8370247	8371480	ENSG00000166579:8363327-8363478:source	ENSG00000166579:8367554-8371480:target
ARHGAP44	ENSG00000006740	chr17	+	12887805	12888225	12890417	12890469	12893348	12894960	ENSG00000006740:12887806-12888350:source	ENSG00000006740:12893349-12894960:target
MPRIP	ENSG00000133030	chr17	+	17083316	17083402	17083920	17083983	17088136	17088874	ENSG00000133030:17088137-17088874:target	ENSG00000133030:17083317-17083464:source
RAI1	ENSG00000108557	chr17	+	17627341	17627473	17657542	17657693	17696246	17698246	ENSG00000108557:17627342-17627473:source	ENSG00000108557:17696247-17701056:target
TOM1L2	ENSG00000175662	chr17	-	17764789	17764865	17754206	17754266	17752136	17752173	ENSG00000175662:17752137-17752263:source	ENSG00000175662:17764790-17764865:target
MYO18A	ENSG00000196535	chr17	-	27413455	27413819	27412621	27412666	27409333	27409456	ENSG00000196535:27409334-27409456:source	ENSG00000196535:27413456-27413819:target
SSH2	ENSG00000141298	chr17	-	28256955	28257170	28175866	28175947	28120633	28120955	ENSG00000141298:28120634-28120955:source	ENSG00000141298:28256956-28257170:target
RP11-848P1.9	ENSG00000266865	chr17	+	29348927	29349060	29350623	29350778	29351394	29351444	ENSG00000266865:29348928-29349359:source	ENSG00000266865:29351359-29351444:target
NF1	ENSG00000196712	chr17	+	29576001	29576137	29579955	29580018	29585361	29585520	ENSG00000196712:29585362-29585520:target	ENSG00000196712:29576002-29576137:source
ENSG00000006114	ENSG00000006114	chr17	-	35944755	35944867	35937477	35937711	35936438	35936516	ENSG00000006114:35944430-35944867:target	ENSG00000006114:35936439-35936578:source
CRHR1-IT1	ENSG00000204650	chr17	+	43716282	43716886	43717754	43717821	43723266	43725266	ENSG00000204650:43716283-43716886:source	ENSG00000204650:43723037-43725582:target
MAPT	ENSG00000186868	chr17	+	44039686	44039836	44049224	44049311	44055740	44057740	ENSG00000186868:44052858-44057872:target	ENSG00000186868:44039687-44039836:source
MAPT	ENSG00000186868	chr17	+	44064405	44064461	44067243	44067441	44068825	44068952	ENSG00000186868:44068826-44068952:target	ENSG00000186868:44064406-44064461:source
BCAS3	ENSG00000141376	chr17	+	59445687	59445855	59457866	59457932	59469337	59470199	ENSG00000141376:59445688-59445855:source	ENSG00000141376:59469338-59470199:target
CEP95	ENSG00000258890	chr17	+	62510346	62510476	62512840	62512946	62515438	62515554	ENSG00000258890:62515439-62515554:target	ENSG00000258890:62510347-62510925:source
USP25	ENSG00000155313	chr21	+	17214716	17214859	17222095	17222191	17236586	17236765	ENSG00000155313:17236587-17236765:target	ENSG00000155313:17214717-17214859:source
APP	ENSG00000142192	chr21	-	27284052	27284274	27277335	27277389	27269884	27269985	ENSG00000142192:27269885-27270295:source	ENSG00000142192:27284053-27284274:target
RAB11FIP3	ENSG00000090565	chr16	+	538850	539000	541133	541268	546823	547158	ENSG00000090565:538851-539101:source	ENSG00000090565:546824-547158:target
CAPN15	ENSG00000103326	chr16	+	583945	583998	586028	586142	596816	597392	ENSG00000103326:583946-583998:source	ENSG00000103326:596817-597392:target
C16orf13	ENSG00000130731	chr16	-	686093	686358	685611	685774	685280	685340	ENSG00000130731:686094-686358:target	ENSG00000130731:685281-685340:source
PKD1	ENSG00000008710	chr16	-	2143544	2143739	2142954	2143094	2142480	2142593	ENSG00000008710:2142481-2142912:source	ENSG00000008710:2143356-2143739:target
TBC1D24	ENSG00000162065	chr16	+	2546034	2547114	2547710	2547728	2548238	2548397	ENSG00000162065:2548239-2548397:target	ENSG00000162065:2546035-2547114:source
LYRM1	ENSG00000102897	chr16	+	20911450	20911857	20913807	20914039	20926877	20927036	ENSG00000102897:20926878-20927036:target	ENSG00000102897:20911451-20911857:source
SMG1P3	ENSG00000180747	chr16	-	21531148	21531765	21498898	21498937	21495692	21495856	ENSG00000180747:21531149-21531765:target	ENSG00000180747:21495693-21495856:source
ARHGAP17	ENSG00000140750	chr16	-	24953307	24953464	24950684	24950918	24946790	24946960	ENSG00000140750:24946791-24948148:source	ENSG00000140750:24953017-24953464:target
RPGRIP1L	ENSG00000103494	chr16	-	53674944	53675028	53672221	53672323	53671606	53671766	ENSG00000103494:53671607-53671766:source	ENSG00000103494:53674945-53675028:target
NFAT5	ENSG00000102908	chr16	+	69660305	69660431	69680419	69680481	69680930	69681489	ENSG00000102908:69660306-69660431:source	ENSG00000102908:69680931-69681489:target
NUDT7	ENSG00000140876	chr16	+	77769724	77769883	77770546	77770640	77775478	77776157	ENSG00000140876:77769725-77770146:source	ENSG00000140876:77775479-77776157:target
PIEZO1	ENSG00000103335	chr16	-	88791823	88791927	88791416	88791488	88790354	88790379	ENSG00000103335:88791824-88791927:target	ENSG00000103335:88790355-88790379:source
ANKRD20A5P	ENSG00000186481	chr18	+	14179095	14179596	14183650	14183765	14183927	14185400	ENSG00000186481:14183928-14185400:target	ENSG00000186481:14179096-14179596:source
KIAA1328	ENSG00000150477	chr18	+	34415196	34415339	34424170	34424265	34465519	34466367	ENSG00000150477:34465520-34466367:target	ENSG00000150477:34415197-34415339:source
MALT1	ENSG00000172175	chr18	+	56377207	56377304	56378152	56378185	56381314	56381341	ENSG00000172175:56377208-56377304:source	ENSG00000172175:56381315-56381341:target
KIAA1468	ENSG00000134444	chr18	+	59942606	59942706	59947006	59947089	59947878	59947942	ENSG00000134444:59947879-59947942:target	ENSG00000134444:59942607-59942805:source
PQLC1	ENSG00000122490	chr18	-	77703328	77703462	77693968	77694022	77679183	77679400	ENSG00000122490:77679184-77679400:source	ENSG00000122490:77703329-77703462:target
CAPN7	ENSG00000131375	chr3	+	15282260	15282360	15282959	15283095	15283684	15283760	ENSG00000131375:15283685-15283760:target	ENSG00000131375:15282261-15282360:source
CAPN7	ENSG00000131375	chr3	+	15283684	15283760	15287032	15287178	15288238	15288301	ENSG00000131375:15287394-15288301:target	ENSG00000131375:15283685-15283760:source
SLMAP	ENSG00000163681	chr3	+	57908615	57908750	57911571	57911661	57913022	57914895	ENSG00000163681:57913023-57914895:target	ENSG00000163681:57908616-57908750:source
FLNB	ENSG00000136068	chr3	+	58124008	58124256	58127584	58127656	58128376	58128479	ENSG00000136068:58128377-58128479:target	ENSG00000136068:58124009-58124256:source
MAGI1	ENSG00000151276	chr3	-	65438932	65439015	65433696	65433732	65428466	65428524	ENSG00000151276:65438257-65439015:target	ENSG00000151276:65428467-65428524:source
NPHP3	ENSG00000113971	chr3	-	132416103	132416206	132415574	132415657	132413670	132413809	ENSG00000113971:132416104-132416206:target	ENSG00000113971:132413671-132414000:source
NPHP3	ENSG00000113971	chr3	-	132418761	132418905	132418196	132418294	132416103	132416206	ENSG00000113971:132416104-132416206:source	ENSG00000113971:132418762-132418905:target
PLSCR1	ENSG00000188313	chr3	-	146251256	146251337	146246400	146246618	146243315	146243434	ENSG00000188313:146243316-146243434:source	ENSG00000188313:146251257-146251337:target
ECT2	ENSG00000114346	chr3	+	172473084	172473164	172473272	172473365	172474772	172474955	ENSG00000114346:172473085-172473164:source	ENSG00000114346:172474773-172474955:target
DNAJC19	ENSG00000205981	chr3	-	180705810	180705884	180704730	180704810	180703197	180703784	ENSG00000205981:180704968-180705884:target	ENSG00000205981:180703198-180703784:source
IL1RAP	ENSG00000196083	chr3	+	190231839	190232008	190273918	190274005	190282077	190282457	ENSG00000196083:190231840-190232084:source	ENSG00000196083:190282072-190282457:target
SENP5	ENSG00000119231	chr3	+	196630403	196630481	196650284	196650422	196656503	196656554	ENSG00000119231:196630404-196630481:source	ENSG00000119231:196656057-196656554:target
ARHGAP11B	ENSG00000187951	chr15	+	30927282	30927391	30927511	30927610	30927689	30927836	ENSG00000187951:30927690-30927836:target	ENSG00000187951:30927283-30927446:source
MTMR10	ENSG00000166912	chr15	-	31266516	31266659	31260122	31260213	31253083	31253276	ENSG00000166912:31266517-31266659:target	ENSG00000166912:31253084-31253276:source
RP11-632K20.7	ENSG00000223509	chr15	-	32819013	32819179	32816671	32816801	32814893	32815414	ENSG00000223509:32814894-32815414:source	ENSG00000223509:32818851-32819179:target
MYEF2	ENSG00000104177	chr15	-	48444430	48444481	48444243	48444312	48444070	48444139	ENSG00000104177:48444314-48444481:target	ENSG00000104177:48444071-48444139:source
SECISBP2L	ENSG00000138593	chr15	-	49319561	49319677	49311614	49311749	49309744	49309825	ENSG00000138593:49309745-49309990:source	ENSG00000138593:49319562-49319677:target
VPS13C	ENSG00000129003	chr15	-	62211487	62211648	62210916	62210983	62210334	62210456	ENSG00000129003:62211488-62211648:target	ENSG00000129003:62210335-62210456:source
MYO9A	ENSG00000066933	chr15	-	72186019	72186119	72185305	72185518	72180344	72180457	ENSG00000066933:72185803-72186119:target	ENSG00000066933:72180345-72180948:source
LYRM5	ENSG00000205707	chr12	+	25348149	25348271	25356658	25356766	25356853	25356941	ENSG00000205707:25356854-25356941:target	ENSG00000205707:25348150-25348275:source
PPFIBP1	ENSG00000110841	chr12	+	27829360	27829532	27829996	27830029	27832421	27832572	ENSG00000110841:27832422-27832572:target	ENSG00000110841:27829361-27829532:source
FMNL3	ENSG00000161791	chr12	-	50040668	50040792	50040421	50040536	50038715	50039686	ENSG00000161791:50038716-50039686:source	ENSG00000161791:50040669-50040792:target
MYL6	ENSG00000092841	chr12	+	56554026	56554104	56554409	56554454	56555170	56555371	ENSG00000092841:56554027-56554127:source	ENSG00000092841:56555171-56555371:target
B4GALNT1	ENSG00000135454	chr12	-	58026554	58027138	58026323	58026364	58025697	58025916	ENSG00000135454:58025698-58025916:source	ENSG00000135454:58026555-58027138:target
GRIP1	ENSG00000155974	chr12	-	66770953	66771065	66770796	66770841	66765473	66765707	ENSG00000155974:66765474-66766121:source	ENSG00000155974:66770954-66771065:target
MDM1	ENSG00000111554	chr12	-	68720436	68721290	68719220	68719355	68716852	68717020	ENSG00000111554:68720437-68721290:target	ENSG00000111554:68716853-68717178:source
PPP1R12A	ENSG00000058272	chr12	-	80199945	80200113	80199371	80199548	80192273	80192364	ENSG00000058272:80199946-80200113:target	ENSG00000058272:80192274-80192364:source
NEDD1	ENSG00000139350	chr12	+	97301479	97301634	97311398	97311515	97313762	97313903	ENSG00000139350:97313763-97313903:target	ENSG00000139350:97301480-97301634:source
RMST	ENSG00000255794	chr12	+	97888472	97888659	97889708	97889834	97924432	97924637	ENSG00000255794:97924142-97924637:target	ENSG00000255794:97888473-97888659:source
PARPBP	ENSG00000185480	chr12	+	102569260	102569444	102572369	102572548	102576326	102576405	ENSG00000185480:102569261-102569444:source	ENSG00000185480:102576327-102576405:target
GIT2	ENSG00000139436	chr12	-	110385060	110385309	110383064	110383154	110376969	110377052	ENSG00000139436:110376970-110377490:source	ENSG00000139436:110385061-110385309:target
PITPNM2	ENSG00000090975	chr12	-	123475091	123475256	123474333	123474495	123473270	123473419	ENSG00000090975:123475092-123475256:target	ENSG00000090975:123473271-123473674:source
PITPNM2	ENSG00000090975	chr12	-	123477045	123477216	123476301	123476445	123475091	123475256	ENSG00000090975:123475092-123475256:source	ENSG00000090975:123477046-123477216:target
CCDC92	ENSG00000119242	chr12	-	124457075	124457378	124428818	124428911	124427893	124428040	ENSG00000119242:124427894-124428042:source	ENSG00000119242:124457076-124457378:target
TBL1X	ENSG00000101849	chrX	+	9608312	9608400	9621584	9621729	9622254	9622362	ENSG00000101849:9608313-9608400:source	ENSG00000101849:9622255-9622362:target
PHKA2	ENSG00000044446	chrX	-	18918787	18918817	18917290	18917344	18915280	18915451	ENSG00000044446:18915281-18916287:source	ENSG00000044446:18918788-18918817:target
NUP62CL	ENSG00000198088	chrX	-	106410878	106411014	106397325	106397476	106396683	106396733	ENSG00000198088:106410879-106411014:target	ENSG00000198088:106396684-106396733:source
ATP11C	ENSG00000101974	chrX	-	138820074	138820228	138813809	138813914	138809121	138811121	ENSG00000101974:138820075-138820228:target	ENSG00000101974:138808505-138811121:source
GRK4	ENSG00000125388	chr4	+	3009462	3009555	3011374	3011438	3015414	3015555	ENSG00000125388:3009463-3009555:source	ENSG00000125388:3015415-3015555:target
RGS12	ENSG00000159788	chr4	+	3429815	3429896	3430284	3430438	3432133	3433977	ENSG00000159788:3432134-3433977:target	ENSG00000159788:3429816-3430202:source
D4S234E	ENSG00000168824	chr4	+	4387583	4388370	4388845	4388900	4389330	4389485	ENSG00000168824:4389331-4389485:target	ENSG00000168824:4387584-4388370:source
DCAF16	ENSG00000163257	chr4	-	17812069	17812381	17811159	17811315	17806729	17806848	ENSG00000163257:17812070-17812381:target	ENSG00000163257:17806730-17806848:source
PACRGL	ENSG00000163138	chr4	+	20709424	20709493	20711305	20711396	20714410	20714545	ENSG00000163138:20709425-20709493:source	ENSG00000163138:20714322-20714545:target
APBB2	ENSG00000163697	chr4	-	40946881	40947090	40937093	40937156	40936630	40936716	ENSG00000163697:40936631-40936716:source	ENSG00000163697:40946882-40947090:target
PKD2	ENSG00000118762	chr4	+	88977217	88977419	88979134	88979255	88983057	88983156	ENSG00000118762:88977218-88977419:source	ENSG00000118762:88983058-88983156:target
PPA2	ENSG00000138777	chr4	-	106395050	106395238	106377837	106377902	106374754	106374799	ENSG00000138777:106395051-106395238:target	ENSG00000138777:106374755-106374799:source
ZGRF1	ENSG00000138658	chr4	-	113474990	113475138	113469408	113469536	113468440	113468564	ENSG00000138658:113474991-113475138:target	ENSG00000138658:113468441-113468564:source
KIAA1109	ENSG00000138688	chr4	+	123246384	123246475	123247009	123247072	123249258	123249512	ENSG00000138688:123246385-123246475:source	ENSG00000138688:123249027-123249512:target
MFSD8	ENSG00000164073	chr4	-	128863199	128863313	128861007	128861152	128859937	128859993	ENSG00000164073:128863199-128863313:target	ENSG00000164073:128859938-128859993:source
SLC10A7	ENSG00000120519	chr4	-	147179843	147179989	147177977	147178088	147175672	147177672	ENSG00000120519:147179844-147179989:target	ENSG00000120519:147175127-147177672:source
SH3YL1	ENSG00000035115	chr2	-	247537	247602	242797	242871	234159	234272	ENSG00000035115:234160-234272:source	ENSG00000035115:247538-247602:target
PXDN	ENSG00000130508	chr2	-	1695699	1695771	1691403	1691475	1687851	1687923	ENSG00000130508:1687852-1687923:source	ENSG00000130508:1695700-1695771:target
TRAPPC12	ENSG00000171853	chr2	+	3469367	3469466	3481465	3481566	3482616	3482704	ENSG00000171853:3482485-3482704:target	ENSG00000171853:3469368-3469578:source
AHSA2	ENSG00000173209	chr2	+	61408472	61408540	61410681	61410797	61411846	61412059	ENSG00000173209:61408473-61408815:source	ENSG00000173209:61411847-61412059:target
XPO1	ENSG00000082898	chr2	-	61753554	61753658	61752404	61752468	61749745	61749818	ENSG00000082898:61749746-61749818:source	ENSG00000082898:61753202-61753658:target
GGCX	ENSG00000115486	chr2	-	85780061	85780193	85779538	85779690	85778934	85779104	ENSG00000115486:85778935-85779104:source	ENSG00000115486:85780046-85780193:target
AC027612.6	ENSG00000143429	chr2	-	91843393	91843529	91842945	91843023	91831024	91831379	ENSG00000143429:91831025-91831379:source	ENSG00000143429:91843394-91843529:target
PTPN4	ENSG00000088179	chr2	+	120677644	120677817	120684173	120684242	120689999	120690125	ENSG00000088179:120689856-120690125:target	ENSG00000088179:120677645-120677817:source
EPB41L5	ENSG00000115109	chr2	+	120858274	120858390	120859164	120859267	120861635	120862691	ENSG00000115109:120861636-120862691:target	ENSG00000115109:120858275-120858390:source
CLASP1	ENSG00000074054	chr2	-	122204912	122205083	122203024	122203072	122187648	122187753	ENSG00000074054:122187649-122187753:source	ENSG00000074054:122204913-122205083:target
BIN1	ENSG00000136717	chr2	-	127816586	127816731	127815048	127815177	127808729	127808819	ENSG00000136717:127808730-127808819:source	ENSG00000136717:127816587-127816731:target
UGGT1	ENSG00000136731	chr2	+	128913062	128913161	128913965	128913989	128914825	128914920	ENSG00000136731:128914826-128914920:target	ENSG00000136731:128913063-128913161:source
SMPD4	ENSG00000136699	chr2	-	130921946	130922018	130918758	130918845	130914933	130914969	ENSG00000136699:130921947-130922018:target	ENSG00000136699:130914934-130915526:source
AC093838.4	ENSG00000152117	chr2	+	132266109	132266181	132269287	132269374	132273174	132273321	ENSG00000152117:132266110-132266181:source	ENSG00000152117:132273175-132273321:target
GTDC1	ENSG00000121964	chr2	-	144993242	144993307	144987807	144987889	144969081	144969146	ENSG00000121964:144969082-144969164:source	ENSG00000121964:144993243-144993307:target
MBD5	ENSG00000204406	chr2	+	149216198	149216440	149217791	149217873	149220150	149220253	ENSG00000204406:149220151-149220253:target	ENSG00000204406:149216199-149216440:source
UBR3	ENSG00000144357	chr2	+	170732300	170732459	170734003	170734147	170735034	170735084	ENSG00000144357:170732301-170732459:source	ENSG00000144357:170735035-170735084:target
ATF2	ENSG00000115966	chr2	-	175994865	175994935	175986171	175986268	175982978	175983097	ENSG00000115966:175982979-175983097:source	ENSG00000115966:175994866-175994935:target
FKBP7	ENSG00000079150	chr2	-	179343005	179343327	179341788	179341940	179328658	179330658	ENSG00000079150:179343006-179343327:target	ENSG00000079150:179328391-179330658:source
NABP1	ENSG00000173559	chr2	+	192546671	192546743	192547217	192547321	192548454	192548530	ENSG00000173559:192546672-192547213:source	ENSG00000173559:192548016-192548530:target
SPATS2L	ENSG00000196141	chr2	+	201283972	201284219	201303844	201304051	201305371	201305507	ENSG00000196141:201305372-201305507:target	ENSG00000196141:201283973-201284219:source
ALS2	ENSG00000003393	chr2	-	202587765	202587843	202584708	202584851	202582799	202582933	ENSG00000003393:202582800-202582933:source	ENSG00000003393:202586713-202587843:target
ATG9A	ENSG00000198925	chr2	-	220094256	220094439	220093731	220093896	220093145	220093207	ENSG00000198925:220094257-220094439:target	ENSG00000198925:220093146-220093415:source
MFF	ENSG00000168958	chr2	+	228205007	228205096	228211941	228212100	228220392	228220477	ENSG00000168958:228205008-228205277:source	ENSG00000168958:228220014-228220477:target
EIF4E2	ENSG00000135930	chr2	+	233431787	233431924	233438972	233439051	233445613	233447613	ENSG00000135930:233445614-233448354:target	ENSG00000135930:233431788-233432730:source
VLDLR	ENSG00000147852	chr9	+	2650369	2650516	2651414	2651498	2651873	2651954	ENSG00000147852:2650370-2650516:source	ENSG00000147852:2651874-2651954:target
PLGRKT	ENSG00000107020	chr9	-	5436568	5436694	5431896	5431983	5361757	5361888	ENSG00000107020:5361758-5361888:source	ENSG00000107020:5436569-5436694:target
KIF27	ENSG00000165115	chr9	-	86468543	86468750	86468151	86468229	86465013	86465212	ENSG00000165115:86468544-86468750:target	ENSG00000165115:86465014-86465212:source
WNK2	ENSG00000165238	chr9	+	96060134	96060349	96069058	96069103	96070609	96070870	ENSG00000165238:96070610-96070870:target	ENSG00000165238:96060135-96060349:source
ZNF618	ENSG00000157657	chr9	+	116750600	116750860	116760538	116760634	116764275	116764353	ENSG00000157657:116750601-116750860:source	ENSG00000157657:116764276-116764353:target
DENND1A	ENSG00000119522	chr9	-	126165680	126165852	126150008	126150137	126145933	126146192	ENSG00000119522:126145934-126146192:source	ENSG00000119522:126165681-126165852:target
ZBTB43	ENSG00000169155	chr9	+	129567284	129567411	129571071	129571194	129594765	129595375	ENSG00000169155:129567285-129567411:source	ENSG00000169155:129593688-129595375:target
FNBP1	ENSG00000187239	chr9	-	132687238	132687436	132686122	132686305	132671168	132671278	ENSG00000187239:132671169-132671285:source	ENSG00000187239:132687239-132687436:target
SDCCAG3	ENSG00000165689	chr9	-	139304779	139305061	139304541	139304691	139302277	139302390	ENSG00000165689:139304780-139305061:target	ENSG00000165689:139302278-139302418:source
SEC16A	ENSG00000148396	chr9	-	139340096	139340171	139339503	139339563	139338274	139338352	ENSG00000148396:139338275-139338534:source	ENSG00000148396:139340097-139340171:target
USPL1	ENSG00000132952	chr13	+	31191829	31192193	31195209	31195376	31195900	31196029	ENSG00000132952:31191830-31192193:source	ENSG00000132952:31195901-31196029:target
SETDB2	ENSG00000136169	chr13	+	50018428	50018993	50025688	50026045	50034242	50034368	ENSG00000136169:50034243-50034368:target	ENSG00000136169:50018429-50018993:source
BORA	ENSG00000136122	chr13	+	73303063	73303231	73305418	73305525	73312099	73312181	ENSG00000136122:73303064-73303231:source	ENSG00000136122:73312100-73312181:target
PIBF1	ENSG00000083535	chr13	+	73428194	73428293	73467921	73468087	73482668	73482819	ENSG00000083535:73482669-73482819:target	ENSG00000083535:73428195-73428293:source
TMTC4	ENSG00000125247	chr13	-	101315217	101315434	101308634	101308722	101294464	101294565	ENSG00000125247:101294465-101294565:source	ENSG00000125247:101315218-101315434:target
TEX30	ENSG00000151287	chr13	-	103426031	103426161	103422361	103422436	103421660	103421891	ENSG00000151287:103421661-103421891:source	ENSG00000151287:103426032-103426161:target
IDI1	ENSG00000067064	chr10	-	1094803	1095110	1089938	1090111	1089240	1089333	ENSG00000067064:1094804-1095110:target	ENSG00000067064:1089241-1089333:source
CELF2	ENSG00000048740	chr10	+	11299700	11299835	11308560	11308640	11312628	11312787	ENSG00000048740:11299701-11299835:source	ENSG00000048740:11312629-11312787:target
FAM188A	ENSG00000148481	chr10	-	15883424	15883598	15880226	15880278	15879202	15879317	ENSG00000148481:15879203-15879317:source	ENSG00000148481:15883425-15883598:target
ABI1	ENSG00000136754	chr10	-	27047990	27048167	27044583	27044670	27040526	27040712	ENSG00000136754:27047991-27048167:target	ENSG00000136754:27040527-27040712:source
ARHGAP12	ENSG00000165322	chr10	-	32150322	32150586	32142993	32143134	32141444	32141525	ENSG00000165322:32150323-32150586:target	ENSG00000165322:32141445-32141525:source
ZNF248	ENSG00000198105	chr10	-	38121952	38122044	38120159	38120240	38092760	38092871	ENSG00000198105:38092761-38092871:source	ENSG00000198105:38120463-38122044:target
JMJD1C	ENSG00000171988	chr10	-	65024410	65024524	64979637	64979743	64976966	64977091	ENSG00000171988:65024411-65024524:target	ENSG00000171988:64976967-64977091:source
ANXA11	ENSG00000122359	chr10	-	81965098	81965328	81940696	81941211	81935862	81935911	ENSG00000122359:81935863-81935911:source	ENSG00000122359:81965095-81965328:target
PTPRE	ENSG00000132334	chr10	+	129847793	129847930	129854386	129854477	129859202	129859279	ENSG00000132334:129859203-129859279:target	ENSG00000132334:129847794-129847930:source
MKI67	ENSG00000148773	chr10	-	129914754	129914800	129913191	129914271	129911690	129911866	ENSG00000148773:129914755-129914800:target	ENSG00000148773:129911691-129911866:source
SDHAP3	ENSG00000185986	chr5	-	1585098	1585248	1579391	1579599	1576293	1576424	ENSG00000185986:1585099-1585248:target	ENSG00000185986:1576294-1576424:source
RP11-43F13.1	ENSG00000188002	chr5	-	1632758	1632866	1630523	1630681	1628869	1629745	ENSG00000188002:1632759-1632866:target	ENSG00000188002:1628870-1629745:source
MTRR	ENSG00000124275	chr5	+	7870882	7871036	7873485	7873639	7875370	7875488	ENSG00000124275:7870883-7871036:source	ENSG00000124275:7875275-7875488:target
RAD1	ENSG00000113456	chr5	-	34914799	34915066	34913574	34913683	34911658	34911917	ENSG00000113456:34914582-34915066:target	ENSG00000113456:34911659-34911917:source
PARP8	ENSG00000151883	chr5	+	50055476	50055566	50056125	50056196	50057654	50057736	ENSG00000151883:50055477-50055566:source	ENSG00000151883:50057655-50057736:target
SLC38A9	ENSG00000177058	chr5	-	55007279	55007327	55000149	55000262	54993786	54993820	ENSG00000177058:55007180-55007327:target	ENSG00000177058:54993787-54993822:source
SREK1	ENSG00000153914	chr5	+	65449395	65449424	65454636	65454760	65455046	65455162	ENSG00000153914:65454934-65455162:target	ENSG00000153914:65449396-65449618:source
CCDC125	ENSG00000183323	chr5	-	68590619	68590727	68588014	68588189	68581163	68581294	ENSG00000183323:68581164-68581294:source	ENSG00000183323:68590620-68590727:target
MCTP1	ENSG00000175471	chr5	-	94275787	94275899	94267657	94267696	94248510	94248681	ENSG00000175471:94275788-94275899:target	ENSG00000175471:94248511-94248681:source
FNIP1	ENSG00000217128	chr5	-	131052257	131052349	131046270	131046354	131044893	131044965	ENSG00000217128:131044894-131044965:source	ENSG00000217128:131052258-131052349:target
SAR1B	ENSG00000152700	chr5	-	133968417	133968678	133967766	133967885	133959651	133959727	ENSG00000152700:133959652-133959727:source	ENSG00000152700:133968418-133968678:target
H2AFY	ENSG00000113648	chr5	-	134696186	134698186	134686512	134686603	134681379	134681747	ENSG00000113648:134681380-134683296:source	ENSG00000113648:134696106-134698591:target
FAM13B	ENSG00000031003	chr5	-	137356719	137356886	137354643	137354835	137353990	137354203	ENSG00000031003:137353991-137354203:source	ENSG00000031003:137356452-137356886:target
DIAPH1	ENSG00000131504	chr5	-	140998364	140998622	140967790	140967817	140966608	140966764	ENSG00000131504:140998365-140998622:target	ENSG00000131504:140966609-140966764:source
KIAA0141	ENSG00000081791	chr5	+	141314058	141314151	141316762	141316922	141318085	141318325	ENSG00000081791:141318086-141318325:target	ENSG00000081791:141314059-141314561:source

## Sheet: CELF2 enhanced
#GeneName	EnsemblID	chromsome	strand	C1start	C1end	Astart	Aend	C2start	C2end	LSV1	LSV2
C7orf26	ENSG00000146576	chr7	+	6641731	6641771	6647167	6647228	6647590	6648357	ENSG00000146576:6641732-6641890:source	ENSG00000146576:6647591-6648357:target
KLHL7	ENSG00000122550	chr7	+	23164598	23164791	23165379	23165418	23180387	23180563	ENSG00000122550:23164599-23165255:source	ENSG00000122550:23180388-23180563:target
FKBP14	ENSG00000106080	chr7	-	30062280	30062432	30059828	30059920	30058611	30058739	ENSG00000106080:30058612-30058739:source	ENSG00000106080:30061834-30062432:target
NOD1	ENSG00000106100	chr7	-	30518221	30518400	30503224	30503314	30499516	30499657	ENSG00000106100:30499517-30499657:source	ENSG00000106100:30518222-30518400:target
AC005154.6	ENSG00000196295	chr7	-	30618846	30618930	30618621	30618744	30617519	30617707	ENSG00000196295:30617520-30617707:source	ENSG00000196295:30618847-30618930:target
AVL9	ENSG00000105778	chr7	+	32615566	32615684	32619830	32619884	32620413	32620502	ENSG00000105778:32620375-32620502:target	ENSG00000105778:32615567-32615684:source
POLM	ENSG00000122678	chr7	-	44113996	44114129	44113729	44113832	44113381	44113624	ENSG00000122678:44113997-44114129:target	ENSG00000122678:44113382-44113717:source
ZMIZ2	ENSG00000122515	chr7	+	44798879	44799059	44799749	44799827	44800023	44800192	ENSG00000122515:44800024-44800192:target	ENSG00000122515:44798880-44799059:source
ZMIZ2	ENSG00000122515	chr7	+	44804933	44805178	44805565	44805655	44805762	44805932	ENSG00000122515:44805763-44805932:target	ENSG00000122515:44804934-44805324:source
VKORC1L1	ENSG00000196715	chr7	+	65338253	65338552	65413657	65413767	65419060	65421060	ENSG00000196715:65338254-65338552:source	ENSG00000196715:65419061-65424550:target
ASL	ENSG00000126522	chr7	+	65551571	65551649	65551730	65551808	65552320	65552373	ENSG00000126522:65552321-65552373:target	ENSG00000126522:65551572-65551649:source
TMEM120A	ENSG00000189077	chr7	-	75617035	75617128	75616855	75616920	75616677	75616746	ENSG00000189077:75617036-75617128:target	ENSG00000189077:75616678-75616853:source
ZNF789	ENSG00000198556	chr7	+	99073862	99074103	99075896	99075979	99077283	99078924	ENSG00000198556:99077263-99078924:target	ENSG00000198556:99073863-99074519:source
ZNF3	ENSG00000166526	chr7	-	99679257	99679385	99677158	99677279	99672934	99673253	ENSG00000166526:99679258-99679385:target	ENSG00000166526:99672935-99673253:source
LRCH4	ENSG00000077454	chr7	-	100175119	100175204	100174895	100175012	100174708	100174777	ENSG00000077454:100174709-100174777:source	ENSG00000077454:100175120-100175204:target
PRKRIP1	ENSG00000128563	chr7	+	102016658	102016769	102036423	102036984	102038066	102038145	ENSG00000128563:102038067-102038145:target	ENSG00000128563:102016659-102016769:source
SRPK2	ENSG00000135250	chr7	-	105029094	105029149	104909252	104909316	104844140	104844232	ENSG00000135250:104844141-104844232:source	ENSG00000135250:105029095-105029149:target
ZNF767P	ENSG00000133624	chr7	-	149318350	149318650	149318136	149318263	149316839	149317128	ENSG00000133624:149318351-149318650:target	ENSG00000133624:149316840-149317128:source
CDC25B	ENSG00000101224	chr20	+	3781108	3781145	3781389	3781512	3781617	3781740	ENSG00000101224:3781618-3781740:target	ENSG00000101224:3781109-3781145:source
RBM39	ENSG00000131051	chr20	-	34328745	34328809	34328446	34328519	34326885	34326939	ENSG00000131051:34328746-34328809:target	ENSG00000131051:34326886-34327205:source
SRSF6	ENSG00000124193	chr20	+	42087000	42087149	42087792	42088060	42088410	42088535	ENSG00000124193:42088411-42088535:target	ENSG00000124193:42087001-42087153:source
PKIG	ENSG00000168734	chr20	+	43160425	43160619	43211225	43211372	43218437	43218507	ENSG00000168734:43218438-43218507:target	ENSG00000168734:43160426-43161041:source
PABPC1L	ENSG00000101104	chr20	+	43565277	43565371	43565534	43565617	43566701	43566832	ENSG00000101104:43566467-43566832:target	ENSG00000101104:43565278-43565371:source
SLC9A8	ENSG00000197818	chr20	+	48466115	48466217	48467346	48467381	48471974	48472118	ENSG00000197818:48466116-48466217:source	ENSG00000197818:48471975-48472118:target
AURKA	ENSG00000087586	chr20	-	54965611	54965721	54963742	54963840	54963211	54963258	ENSG00000087586:54965612-54965721:target	ENSG00000087586:54963212-54963258:source
DNAJC5	ENSG00000101152	chr20	+	62562203	62562375	62562461	62562535	62562817	62564817	ENSG00000101152:62562204-62562375:source	ENSG00000101152:62562818-62567384:target
ACIN1	ENSG00000100813	chr14	-	23559730	23559842	23559190	23559310	23550956	23551045	ENSG00000100813:23550957-23551045:source	ENSG00000100813:23559731-23559842:target
SLC22A17	ENSG00000092096	chr14	-	23817369	23817515	23817099	23817205	23816668	23816940	ENSG00000092096:23816669-23816940:source	ENSG00000092096:23817370-23817515:target
AP1G2	ENSG00000213983	chr14	-	24036319	24036559	24035770	24035895	24035486	24035628	ENSG00000213983:24035487-24035628:source	ENSG00000213983:24036018-24036559:target
PRPF39	ENSG00000185246	chr14	+	45565305	45565431	45565798	45565961	45566089	45566208	ENSG00000185246:45566090-45566208:target	ENSG00000185246:45565306-45565431:source
FNTB	ENSG00000257365	chr14	+	65494415	65494499	65499076	65499221	65499327	65499414	ENSG00000257365:65494416-65494499:source	ENSG00000257365:65499328-65499414:target
ABCD4	ENSG00000119688	chr14	-	74761850	74761901	74759856	74759951	74759533	74759572	ENSG00000119688:74759534-74759572:source	ENSG00000119688:74760757-74761901:target
ABCD4	ENSG00000119688	chr14	-	74766250	74766378	74764632	74764772	74763035	74763152	ENSG00000119688:74765764-74766378:target	ENSG00000119688:74763036-74763152:source
ABCD4	ENSG00000119688	chr14	-	74769577	74769759	74766852	74766971	74765763	74766378	ENSG00000119688:74769578-74769759:target	ENSG00000119688:74765764-74766378:source
YLPM1	ENSG00000119596	chr14	+	75248036	75249028	75264282	75266400	75269258	75269379	ENSG00000119596:75248037-75249028:source	ENSG00000119596:75269259-75269379:target
DLST	ENSG00000119689	chr14	+	75355977	75356052	75356599	75356655	75357758	75358761	ENSG00000119689:75357759-75358761:target	ENSG00000119689:75355978-75356436:source
SMEK1	ENSG00000100796	chr14	-	91937180	91937339	91932604	91932760	91931593	91931763	ENSG00000100796:91931594-91931763:source	ENSG00000100796:91937181-91937339:target
SLC25A29	ENSG00000197119	chr14	-	100765178	100765222	100761962	100761993	100759630	100759714	ENSG00000197119:100759631-100759714:source	ENSG00000197119:100764935-100765222:target
WDR20	ENSG00000140153	chr14	+	102661274	102661457	102664091	102664184	102674939	102675189	ENSG00000140153:102661275-102661457:source	ENSG00000140153:102674940-102675189:target
TANGO2	ENSG00000183597	chr22	+	20043465	20043536	20049052	20049206	20050860	20050965	ENSG00000183597:20050861-20050965:target	ENSG00000183597:20043466-20043764:source
CRYBB2P1	ENSG00000100058	chr22	+	25844071	25844251	25849282	25849401	25851678	25851807	ENSG00000100058:25851679-25851807:target	ENSG00000100058:25844072-25844251:source
EMID1	ENSG00000186998	chr22	+	29627006	29627129	29627446	29627497	29627581	29627671	ENSG00000186998:29627007-29627129:source	ENSG00000186998:29627582-29627671:target
OSBP2	ENSG00000184792	chr22	+	31285163	31285221	31285476	31285623	31286714	31286960	ENSG00000184792:31286715-31286960:target	ENSG00000184792:31285164-31285221:source
FOXRED2	ENSG00000100350	chr22	-	36900561	36900813	36900144	36900414	36897287	36897454	ENSG00000100350:36897288-36897454:source	ENSG00000100350:36900562-36900813:target
SH3BP1	ENSG00000100092	chr22	+	38035056	38035853	38037132	38037175	38037380	38037485	ENSG00000100092:38037381-38037485:target	ENSG00000100092:38035057-38035853:source
PLA2G6	ENSG00000184381	chr22	-	38525460	38525513	38524275	38524437	38522377	38522456	ENSG00000184381:38522378-38522762:source	ENSG00000184381:38525461-38525513:target
HDAC10	ENSG00000100429	chr22	-	50689199	50689401	50688855	50688952	50688491	50688589	ENSG00000100429:50688492-50688684:source	ENSG00000100429:50689200-50689401:target
MAPK12	ENSG00000188130	chr22	-	50699595	50699737	50699257	50699385	50696671	50696730	ENSG00000188130:50696672-50696730:source	ENSG00000188130:50699596-50699737:target
CPT1B	ENSG00000205560	chr22	-	51012763	51012848	51012236	51012350	51011948	51012144	ENSG00000205560:51011949-51012144:source	ENSG00000205560:51012764-51012848:target
NEIL2	ENSG00000154328	chr8	+	11627147	11627300	11627682	11627844	11628954	11629099	ENSG00000154328:11627148-11627300:source	ENSG00000154328:11628955-11629099:target
PPP3CC	ENSG00000120910	chr8	+	22390433	22390531	22396981	22397011	22398127	22398652	ENSG00000120910:22390434-22390531:source	ENSG00000120910:22398128-22398652:target
BIN3	ENSG00000147439	chr8	-	22494434	22494475	22494037	22494099	22487954	22488091	ENSG00000147439:22494103-22494475:target	ENSG00000147439:22487955-22488091:source
FUT10	ENSG00000172728	chr8	-	33310733	33311028	33246480	33247316	33229781	33230322	ENSG00000172728:33309246-33311028:target	ENSG00000172728:33229782-33230322:source
BAG4	ENSG00000156735	chr8	+	38034116	38034657	38050205	38050313	38065029	38065284	ENSG00000156735:38034117-38034657:source	ENSG00000156735:38065030-38065284:target
FGFR1	ENSG00000077782	chr8	-	38287199	38288338	38286764	38286908	38285863	38285953	ENSG00000077782:38287039-38288338:target	ENSG00000077782:38285864-38285962:source
SLC20A2	ENSG00000168575	chr8	-	42396057	42396351	42391497	42391614	42390314	42390478	ENSG00000168575:42390315-42390478:source	ENSG00000168575:42396058-42396351:target
NDUFAF6	ENSG00000156170	chr8	+	96047681	96047804	96048598	96048722	96053797	96053854	ENSG00000156170:96053798-96053854:target	ENSG00000156170:96047682-96047804:source
OXR1	ENSG00000164830	chr8	+	107726050	107726213	107749747	107749828	107751685	107751811	ENSG00000164830:107726051-107726213:source	ENSG00000164830:107751686-107751811:target
EFR3A	ENSG00000132294	chr8	+	133008636	133008744	133013015	133013245	133014005	133014054	ENSG00000132294:133008637-133008744:source	ENSG00000132294:133014006-133014054:target
PLEC	ENSG00000178209	chr8	-	145000951	145001050	144996671	145000052	144994563	144996563	ENSG00000178209:145000952-145001050:target	ENSG00000178209:144989321-144996563:source
OPLAH	ENSG00000178814	chr8	-	145112758	145112826	145112350	145112616	145112110	145112223	ENSG00000178814:145112111-145112223:source	ENSG00000178814:145112758-145112826:target
PIP5K1C	ENSG00000186111	chr19	-	3638881	3639014	3633434	3633518	3631167	3633167	ENSG00000186111:3630181-3633167:source	ENSG00000186111:3638882-3639014:target
CERS4	ENSG00000090661	chr19	+	8321774	8321961	8322762	8322869	8326571	8326728	ENSG00000090661:8326511-8326728:target	ENSG00000090661:8321775-8322045:source
ZNF266	ENSG00000174652	chr19	-	9529892	9529975	9529437	9529571	9529180	9529307	ENSG00000174652:9529181-9529307:source	ENSG00000174652:9529727-9529975:target
YIPF2	ENSG00000130733	chr19	-	11038474	11038635	11038305	11038392	11036361	11036449	ENSG00000130733:11038475-11038635:target	ENSG00000130733:11036362-11036449:source
CTD-2006C1.2	ENSG00000219665	chr19	+	12098431	12098638	12112588	12112637	12146368	12146587	ENSG00000219665:12146369-12146587:target	ENSG00000219665:12098432-12098638:source
MRI1	ENSG00000037757	chr19	+	13875684	13875923	13876767	13876943	13879172	13879371	ENSG00000037757:13875685-13875923:source	ENSG00000037757:13879173-13879371:target
SIN3B	ENSG00000127511	chr19	+	16973162	16973370	16973694	16973790	16974490	16974607	ENSG00000127511:16974491-16974607:target	ENSG00000127511:16973163-16973370:source
SLC27A1	ENSG00000130304	chr19	+	17598268	17598338	17599656	17599748	17599816	17599926	ENSG00000130304:17598269-17598338:source	ENSG00000130304:17599817-17599926:target
MAST3	ENSG00000099308	chr19	+	18232659	18232732	18232916	18232937	18233482	18233561	ENSG00000099308:18232660-18232732:source	ENSG00000099308:18233483-18233561:target
CTC-459F4.3	ENSG00000267575	chr19	+	28284370	28284558	28288661	28289084	28296512	28297690	ENSG00000267575:28296513-28297690:target	ENSG00000267575:28284371-28284558:source
HNRNPL	ENSG00000104824	chr19	-	39334481	39334554	39332252	39332322	39331127	39331199	ENSG00000104824:39334011-39334554:target	ENSG00000104824:39331128-39331199:source
GMFG	ENSG00000130755	chr19	-	39826613	39826825	39826074	39826171	39823543	39823766	ENSG00000130755:39826614-39826825:target	ENSG00000130755:39823544-39823831:source
MAP3K10	ENSG00000130758	chr19	+	40711027	40711203	40711311	40711506	40711817	40712309	ENSG00000130758:40711818-40712309:target	ENSG00000130758:40711028-40711221:source
PLD3	ENSG00000105223	chr19	+	40854362	40854675	40871624	40871837	40872325	40872417	ENSG00000105223:40872200-40872417:target	ENSG00000105223:40854363-40854675:source
RAB4B	ENSG00000167578	chr19	+	41286289	41286404	41289682	41289745	41289825	41289980	ENSG00000167578:41286290-41286404:source	ENSG00000167578:41289826-41289980:target
ZC3H4	ENSG00000130749	chr19	-	47575034	47575378	47572348	47572600	47569126	47571126	ENSG00000130749:47567444-47571126:source	ENSG00000130749:47575035-47575378:target
HSD17B14	ENSG00000087076	chr19	-	49316919	49316987	49316712	49316809	49316273	49316605	ENSG00000087076:49316920-49316987:target	ENSG00000087076:49316274-49316605:source
LIN7B	ENSG00000104863	chr19	+	49617722	49618224	49618516	49618588	49619519	49619729	ENSG00000104863:49617723-49618224:source	ENSG00000104863:49619375-49619729:target
EMC10	ENSG00000161671	chr19	+	50984140	50984234	50985117	50985204	50985405	50985512	ENSG00000161671:50985406-50985512:target	ENSG00000161671:50984141-50984234:source
ZNF160	ENSG00000170949	chr19	-	53594889	53594973	53594665	53594782	53589384	53589574	ENSG00000170949:53594890-53594973:target	ENSG00000170949:53589385-53589574:source
ZNF586	ENSG00000083828	chr19	+	58281022	58281246	58287910	58288037	58301641	58301768	ENSG00000083828:58301642-58301768:target	ENSG00000083828:58281023-58281246:source
GPR157	ENSG00000180758	chr1	-	9171334	9171548	9165544	9165739	9162693	9164693	ENSG00000180758:9160364-9164693:source	ENSG00000180758:9171228-9171548:target
CLCN6	ENSG00000011021	chr1	+	11888162	11888276	11888514	11888681	11889252	11889379	ENSG00000011021:11888163-11888276:source	ENSG00000011021:11889253-11889379:target
RSG1	ENSG00000132881	chr1	-	16560106	16560259	16559387	16559512	16558991	16559141	ENSG00000132881:16560107-16560259:target	ENSG00000132881:16558992-16559141:source
CROCCP2	ENSG00000215908	chr1	-	16971140	16971178	16969522	16969640	16961521	16961663	ENSG00000215908:16971141-16971178:target	ENSG00000215908:16961522-16961663:source
CROCCP2	ENSG00000215908	chr1	-	16969522	16969640	16969261	16969345	16961521	16961663	ENSG00000215908:16969523-16969640:target	ENSG00000215908:16961522-16961663:source
CROCC	ENSG00000058453	chr1	+	17275293	17275421	17277447	17277617	17279796	17279976	ENSG00000058453:17275294-17275421:source	ENSG00000058453:17279797-17279976:target
SRSF10	ENSG00000188529	chr1	-	24298339	24298502	24298062	24298116	24292213	24294213	ENSG00000188529:24291294-24294446:source	ENSG00000188529:24298340-24298502:target
SYTL1	ENSG00000142765	chr1	+	27676142	27676256	27676462	27676623	27676879	27676976	ENSG00000142765:27676880-27676976:target	ENSG00000142765:27676143-27676256:source
AHDC1	ENSG00000126705	chr1	-	27885216	27885394	27884815	27885041	27879584	27879696	ENSG00000126705:27879585-27879815:source	ENSG00000126705:27885217-27885394:target
AK2	ENSG00000004455	chr1	-	33487193	33487304	33486967	33487062	33479965	33480195	ENSG00000004455:33487194-33487304:target	ENSG00000004455:33479966-33480195:source
RP11-69E11.4	ENSG00000182109	chr1	-	39994726	39994836	39989478	39989568	39989233	39989369	ENSG00000182109:39989234-39989369:source	ENSG00000182109:39994688-39994836:target
PPIEL	ENSG00000243970	chr1	-	40020020	40020064	40018789	40018816	40014533	40014623	ENSG00000243970:40020016-40020064:target	ENSG00000243970:40014534-40014623:source
RLF	ENSG00000117000	chr1	+	40688245	40688382	40688967	40689007	40697188	40697330	ENSG00000117000:40688246-40688382:source	ENSG00000117000:40697189-40697330:target
ZNF684	ENSG00000117010	chr1	+	40997232	40997459	40997697	40997818	40998814	40998853	ENSG00000117010:40997233-40997459:source	ENSG00000117010:40998815-40998853:target
SCMH1	ENSG00000010803	chr1	-	41626546	41626570	41617285	41617356	41608545	41608784	ENSG00000010803:41608546-41608784:source	ENSG00000010803:41626547-41626570:target
ENSG00000236624	ENSG00000236624	chr1	-	45962227	45962295	45961089	45961217	45959537	45960838	ENSG00000236624:45961883-45962295:target	ENSG00000236624:45959538-45960838:source
AKR1A1	ENSG00000117448	chr1	+	46016637	46016827	46018107	46018235	46027460	46027550	ENSG00000117448:46016638-46016827:source	ENSG00000117448:46027461-46027550:target
ATPAF1	ENSG00000123472	chr1	-	47123798	47123861	47119488	47119539	47118092	47118300	ENSG00000123472:47123799-47123861:target	ENSG00000123472:47118093-47118300:source
CYB5RL	ENSG00000215883	chr1	-	54653324	54653555	54651853	54651959	54649833	54649938	ENSG00000215883:54653325-54653555:target	ENSG00000215883:54649834-54649938:source
C1orf52	ENSG00000162642	chr1	-	85725040	85725355	85724617	85724744	85724206	85724405	ENSG00000162642:85725041-85725355:target	ENSG00000162642:85724207-85724405:source
LRIF1	ENSG00000121931	chr1	-	111506242	111506701	111493909	111495437	111492472	111492745	ENSG00000121931:111492473-111492745:source	ENSG00000121931:111506243-111506701:target
PRKAB2	ENSG00000131791	chr1	-	146643567	146643746	146639345	146639512	146638424	146638518	ENSG00000131791:146638425-146638518:source	ENSG00000131791:146643568-146643746:target
PRPF3	ENSG00000117360	chr1	+	150298208	150298339	150300015	150300111	150300778	150300925	ENSG00000117360:150298209-150298339:source	ENSG00000117360:150300234-150300925:target
INTS3	ENSG00000143624	chr1	+	153733302	153733394	153733495	153733585	153734045	153734152	ENSG00000143624:153733303-153733394:source	ENSG00000143624:153734046-153734152:target
ADAM15	ENSG00000143537	chr1	+	155033238	155033308	155033893	155033965	155034720	155034845	ENSG00000143537:155033239-155033308:source	ENSG00000143537:155034637-155034845:target
TRIM46	ENSG00000163462	chr1	+	155150967	155151089	155151284	155151322	155152107	155152410	ENSG00000163462:155150968-155151089:source	ENSG00000163462:155152108-155152410:target
THBS3	ENSG00000169231	chr1	-	155170687	155170795	155170241	155170401	155169785	155169904	ENSG00000169231:155170408-155170795:target	ENSG00000169231:155169786-155169904:source
PAQR6	ENSG00000160781	chr1	-	156215325	156215452	156214932	156215029	156214480	156214702	ENSG00000160781:156215326-156215452:target	ENSG00000160781:156214481-156214702:source
ASPM	ENSG00000066279	chr1	-	197086918	197087113	197069560	197074315	197065127	197065294	ENSG00000066279:197086919-197087113:target	ENSG00000066279:197065128-197065294:source
PPFIA4	ENSG00000143847	chr1	+	203025502	203025636	203025911	203026078	203028305	203028399	ENSG00000143847:203025503-203025636:source	ENSG00000143847:203028306-203028399:target
SLC45A3	ENSG00000158715	chr1	-	205631960	205632746	205631435	205631776	205630988	205631254	ENSG00000158715:205630989-205631254:source	ENSG00000158715:205631961-205632746:target
HHAT	ENSG00000054392	chr1	+	210560811	210560925	210573811	210574006	210577807	210578023	ENSG00000054392:210560812-210560925:source	ENSG00000054392:210577808-210578023:target
CDC42BPA	ENSG00000143776	chr1	-	227307504	227307638	227300371	227300614	227299684	227300123	ENSG00000143776:227299685-227300123:source	ENSG00000143776:227307505-227307638:target
PCNXL2	ENSG00000135749	chr1	-	233270758	233270936	233248544	233248712	233231151	233231609	ENSG00000135749:233231152-233231609:source	ENSG00000135749:233270530-233270936:target
SIGIRR	ENSG00000185187	chr11	-	407061	407195	406842	406993	406141	406538	ENSG00000185187:407062-407195:target	ENSG00000185187:406142-406538:source
IRF7	ENSG00000185507	chr11	-	614475	614534	614173	614399	613950	614037	ENSG00000185507:613951-614037:source	ENSG00000185507:614476-614534:target
TRIM5	ENSG00000132256	chr11	-	5688918	5688941	5687210	5687311	5686649	5686912	ENSG00000132256:5688919-5688941:target	ENSG00000132256:5686650-5686912:source
AMBRA1	ENSG00000110497	chr11	-	46563494	46564531	46534276	46534363	46529740	46529920	ENSG00000110497:46563495-46564531:target	ENSG00000110497:46529741-46529920:source
PPP1R32	ENSG00000162148	chr11	+	61253270	61253383	61253995	61254082	61254419	61254533	ENSG00000162148:61254420-61254533:target	ENSG00000162148:61253271-61253383:source
PPP1R32	ENSG00000162148	chr11	+	61254419	61254533	61254617	61254712	61257972	61258056	ENSG00000162148:61254420-61254533:source	ENSG00000162148:61257973-61258056:target
MACROD1	ENSG00000133315	chr11	-	63766426	63766694	63766309	63766344	63766029	63766159	ENSG00000133315:63766427-63766694:target	ENSG00000133315:63766030-63766159:source
DNAJC4	ENSG00000110011	chr11	+	63997903	63998412	63998503	63998619	63999342	63999436	ENSG00000110011:63999088-63999436:target	ENSG00000110011:63997904-63998412:source
SLC25A45	ENSG00000162241	chr11	-	65147337	65147409	65146846	65147032	65144288	65144547	ENSG00000162241:65147247-65147409:target	ENSG00000162241:65144289-65144547:source
SCYL1	ENSG00000142186	chr11	+	65305437	65305653	65305740	65305795	65305912	65306175	ENSG00000142186:65305438-65305653:source	ENSG00000142186:65305913-65306175:target
LTBP3	ENSG00000168056	chr11	-	65307715	65307923	65307483	65307624	65307190	65307352	ENSG00000168056:65307716-65307923:target	ENSG00000168056:65307191-65307352:source
PC	ENSG00000173599	chr11	-	66725792	66725847	66725210	66725467	66719766	66719939	ENSG00000173599:66725793-66725847:target	ENSG00000173599:66719767-66719939:source
PPFIA1	ENSG00000131626	chr11	+	70196028	70196145	70197099	70197129	70200406	70200558	ENSG00000131626:70196029-70196145:source	ENSG00000131626:70200309-70200558:target
NADSYN1	ENSG00000172890	chr11	+	71184614	71184732	71184892	71185004	71185440	71186668	ENSG00000172890:71185441-71186668:target	ENSG00000172890:71184615-71184732:source
XRRA1	ENSG00000166435	chr11	-	74641344	74641417	74638435	74638533	74632258	74632392	ENSG00000166435:74641345-74641417:target	ENSG00000166435:74632259-74632392:source
GDPD5	ENSG00000158555	chr11	-	75201281	75201365	75190288	75190533	75188663	75188840	ENSG00000158555:75188664-75188896:source	ENSG00000158555:75201282-75201365:target
C11orf30	ENSG00000158636	chr11	+	76239311	76239510	76246938	76247103	76248838	76249446	ENSG00000158636:76239312-76239510:source	ENSG00000158636:76248839-76249446:target
FAM76B	ENSG00000077458	chr11	-	95512770	95512851	95512241	95512299	95511985	95512121	ENSG00000077458:95512653-95512851:target	ENSG00000077458:95511986-95512121:source
CHEK1	ENSG00000149554	chr11	+	125496642	125496728	125497501	125497725	125499126	125499191	ENSG00000149554:125496643-125496728:source	ENSG00000149554:125499127-125499191:target
APLP2	ENSG00000084234	chr11	+	130005457	130005610	130007150	130007186	130010292	130010378	ENSG00000084234:130010291-130010378:target	ENSG00000084234:130005458-130005610:source
NQO2	ENSG00000124588	chr6	+	3000109	3000319	3004728	3004885	3006701	3006793	ENSG00000124588:3006702-3006793:target	ENSG00000124588:3000110-3000319:source
BPHL	ENSG00000137274	chr6	+	3140619	3140743	3150256	3150379	3152721	3152767	ENSG00000137274:3152722-3152767:target	ENSG00000137274:3140620-3140743:source
BTN3A2	ENSG00000186470	chr6	+	26370652	26370831	26373124	26373325	26373503	26373524	ENSG00000186470:26370653-26370831:source	ENSG00000186470:26373504-26373524:target
PRSS16	ENSG00000112812	chr6	+	27220586	27220728	27222471	27222651	27222764	27222910	ENSG00000112812:27222765-27222910:target	ENSG00000112812:27220587-27220728:source
TAPBP	ENSG00000231925	chr6	-	33271904	33271994	33271731	33271766	33267548	33269548	ENSG00000231925:33267471-33269548:source	ENSG00000231925:33271905-33271994:target
MOCS1	ENSG00000124615	chr6	-	39877578	39877699	39876815	39876878	39872893	39874893	ENSG00000124615:39872835-39874893:source	ENSG00000124615:39877579-39877699:target
MOCS1	ENSG00000124615	chr6	-	39902033	39902290	39895067	39895194	39893421	39893589	ENSG00000124615:39893422-39893589:source	ENSG00000124615:39902034-39902290:target
MRPS10	ENSG00000048544	chr6	-	42182017	42182082	42181857	42181930	42179518	42179655	ENSG00000048544:42182018-42182082:target	ENSG00000048544:42179519-42179655:source
CUL9	ENSG00000112659	chr6	+	43173744	43173973	43174058	43174248	43180886	43181032	ENSG00000112659:43173745-43173973:source	ENSG00000112659:43180507-43181032:target
WASF1	ENSG00000112290	chr6	-	110500641	110500905	110481837	110481935	110448671	110448832	ENSG00000112290:110448672-110448832:source	ENSG00000112290:110500642-110500905:target
FYN	ENSG00000010810	chr6	-	112021306	112021471	112020717	112020873	112017479	112017659	ENSG00000010810:112017480-112018018:source	ENSG00000010810:112021138-112021471:target
MTRF1L	ENSG00000112031	chr6	-	153313991	153314109	153312319	153312551	153309230	153311230	ENSG00000112031:153313992-153314109:target	ENSG00000112031:153308497-153311230:source
MAP3K4	ENSG00000085511	chr6	+	161517728	161518208	161519309	161519459	161522923	161523024	ENSG00000085511:161517729-161518208:source	ENSG00000085511:161522065-161523024:target
GEMIN4	ENSG00000179409	chr17	-	655372	655501	653053	653149	650680	651272	ENSG00000179409:650681-652591:source	ENSG00000179409:655373-655501:target
ITGAE	ENSG00000083457	chr17	-	3626981	3627148	3626581	3626677	3623600	3623696	ENSG00000083457:3626982-3627148:target	ENSG00000083457:3623601-3623913:source
ANKFY1	ENSG00000185722	chr17	-	4085475	4085647	4085003	4085127	4084320	4084667	ENSG00000185722:4084321-4084667:source	ENSG00000185722:4085476-4085647:target
KIAA0753	ENSG00000198920	chr17	-	6531436	6531807	6528074	6528181	6526828	6526891	ENSG00000198920:6531437-6531807:target	ENSG00000198920:6526829-6526891:source
NEURL4	ENSG00000215041	chr17	-	7230758	7231203	7230483	7230549	7230029	7230328	ENSG00000215041:7230759-7231203:target	ENSG00000215041:7230030-7230328:source
CHD3	ENSG00000170004	chr17	+	7810670	7810806	7810918	7811020	7811211	7811337	ENSG00000170004:7810671-7810806:source	ENSG00000170004:7811209-7811337:target
HES7	ENSG00000179111	chr17	-	8026348	8026444	8026154	8026203	8025660	8025748	ENSG00000179111:8026349-8026444:target	ENSG00000179111:8025661-8025748:source
TRIM16	ENSG00000221926	chr17	-	15586349	15586690	15586167	15586265	15584178	15584267	ENSG00000221926:15584179-15584267:source	ENSG00000221926:15586350-15586690:target
NT5M	ENSG00000205309	chr17	+	17206648	17207131	17207677	17207791	17209856	17209957	ENSG00000205309:17206649-17207215:source	ENSG00000205309:17209857-17209957:target
NT5M	ENSG00000205309	chr17	+	17248107	17248240	17248569	17248626	17250118	17250977	ENSG00000205309:17250119-17250977:target	ENSG00000205309:17248108-17248240:source
TRIM16L	ENSG00000108448	chr17	+	18602466	18602588	18602672	18602770	18604669	18604758	ENSG00000108448:18602467-18602588:source	ENSG00000108448:18604670-18604758:target
WSB1	ENSG00000109046	chr17	+	25633807	25633908	25634769	25634945	25636125	25636298	ENSG00000109046:25636126-25636298:target	ENSG00000109046:25633808-25633908:source
PHF12	ENSG00000109118	chr17	-	27234607	27234690	27233873	27234012	27232267	27233535	ENSG00000109118:27232268-27233535:source	ENSG00000109118:27234608-27234690:target
MYO18A	ENSG00000196535	chr17	-	27445062	27445207	27444707	27444923	27442681	27442858	ENSG00000196535:27445049-27445207:target	ENSG00000196535:27442682-27442870:source
RFFL	ENSG00000092871	chr17	-	33343388	33343599	33341758	33341782	33337168	33339168	ENSG00000092871:33343389-33343599:target	ENSG00000092871:33336131-33339168:source
ENSG00000141140	ENSG00000141140	chr17	-	34858936	34859040	34857691	34857801	34856908	34857075	ENSG00000141140:34856909-34857608:source	ENSG00000141140:34858655-34859040:target
ENSG00000225485	ENSG00000225485	chr17	+	36654026	36654068	36654655	36654752	36656838	36657366	ENSG00000225485:36656575-36657366:target	ENSG00000225485:36654027-36654068:source
C17orf53	ENSG00000125319	chr17	+	42219273	42219513	42220045	42220140	42222570	42222621	ENSG00000125319:42222571-42222621:target	ENSG00000125319:42219274-42219513:source
RUNDC3A-AS1	ENSG00000267750	chr17	-	42384659	42384868	42382348	42382411	42379575	42381575	ENSG00000267750:42376942-42381575:source	ENSG00000267750:42384660-42384868:target
DCAKD	ENSG00000172992	chr17	-	43111554	43111758	43111302	43111410	43107459	43107547	ENSG00000172992:43107460-43107547:source	ENSG00000172992:43111555-43111758:target
ACBD4	ENSG00000181513	chr17	+	43213074	43213320	43213474	43213599	43213866	43213987	ENSG00000181513:43213075-43213320:source	ENSG00000181513:43213867-43213987:target
ARHGAP27	ENSG00000159314	chr17	-	43481810	43481894	43481634	43481700	43481394	43481462	ENSG00000159314:43481395-43481552:source	ENSG00000159314:43481811-43481894:target
SPAG9	ENSG00000008294	chr17	-	49156944	49157065	49145292	49145373	49133772	49133843	ENSG00000008294:49156945-49157065:target	ENSG00000008294:49133773-49133843:source
MKS1	ENSG00000011143	chr17	-	56293448	56293604	56292101	56292199	56291619	56291748	ENSG00000011143:56291620-56291748:source	ENSG00000011143:56292967-56293604:target
DHX40	ENSG00000108406	chr17	+	57656832	57656919	57657057	57657240	57663513	57663594	ENSG00000108406:57656833-57656919:source	ENSG00000108406:57663514-57663594:target
STRADA	ENSG00000266173	chr17	-	61787850	61787974	61784606	61784778	61783994	61784099	ENSG00000266173:61787722-61787974:target	ENSG00000266173:61783995-61784099:source
BPTF	ENSG00000171634	chr17	+	65955656	65955991	65959448	65959622	65960327	65960520	ENSG00000171634:65960328-65960520:target	ENSG00000171634:65955657-65956493:source
KIAA0195	ENSG00000177728	chr17	+	73487771	73487981	73488319	73488418	73488554	73489001	ENSG00000177728:73488555-73489001:target	ENSG00000177728:73487772-73487981:source
LLGL2	ENSG00000073350	chr17	+	73570191	73570341	73570533	73570576	73570690	73570749	ENSG00000073350:73570192-73570341:source	ENSG00000073350:73570691-73570749:target
MYO15B	ENSG00000266714	chr17	+	73588318	73588382	73588508	73588622	73588759	73589112	ENSG00000266714:73588760-73589112:target	ENSG00000266714:73588319-73588382:source
TRIM65	ENSG00000141569	chr17	-	73888091	73888266	73887893	73887959	73885428	73887428	ENSG00000141569:73888092-73888266:target	ENSG00000141569:73885041-73887807:source
AFMID	ENSG00000183077	chr17	+	76198783	76198832	76202026	76202131	76202991	76203782	ENSG00000183077:76202992-76203782:target	ENSG00000183077:76198784-76200120:source
ENDOV	ENSG00000173818	chr17	+	78389449	78389621	78395627	78395762	78396005	78396045	ENSG00000173818:78395940-78396045:target	ENSG00000173818:78389450-78390053:source
STRA13	ENSG00000169689	chr17	-	79977733	79977785	79977516	79977570	79977168	79977257	ENSG00000169689:79977169-79977257:source	ENSG00000169689:79977734-79977785:target
PSMG1	ENSG00000183527	chr21	-	40552210	40552362	40551849	40551912	40550371	40550573	ENSG00000183527:40552211-40552362:target	ENSG00000183527:40550372-40550746:source
TMPRSS3	ENSG00000160183	chr21	-	43804078	43804122	43803141	43803307	43801984	43802343	ENSG00000160183:43804079-43804122:target	ENSG00000160183:43801985-43802343:source
UBASH3A	ENSG00000160185	chr21	+	43833132	43833331	43833518	43833632	43836550	43836720	ENSG00000160185:43833133-43833331:source	ENSG00000160185:43836551-43836720:target
SLC37A1	ENSG00000160190	chr21	+	43934633	43934827	43934979	43935045	43938386	43938620	ENSG00000160190:43934634-43934827:source	ENSG00000160190:43938387-43938620:target
POFUT2	ENSG00000186866	chr21	-	46687504	46687628	46685936	46686142	46683842	46685550	ENSG00000186866:46687441-46687628:target	ENSG00000186866:46683843-46685568:source
POFUT2	ENSG00000186866	chr21	-	46698017	46698084	46697147	46697688	46696931	46697057	ENSG00000186866:46698018-46698084:target	ENSG00000186866:46696932-46697057:source
POFUT2	ENSG00000186866	chr21	-	46702263	46702374	46698212	46698299	46698017	46698084	ENSG00000186866:46698018-46698084:source	ENSG00000186866:46702264-46702374:target
LUC7L	ENSG00000007392	chr16	-	279277	279462	278331	278401	277240	277335	ENSG00000007392:279278-279462:target	ENSG00000007392:277241-277685:source
RAB11FIP3	ENSG00000090565	chr16	+	552749	553097	553263	553350	555523	555627	ENSG00000090565:552750-553097:source	ENSG00000090565:555524-555627:target
WDR90	ENSG00000161996	chr16	+	716654	716792	716904	716989	717431	717833	ENSG00000161996:716655-716792:source	ENSG00000161996:717432-717833:target
CRAMP1L	ENSG00000007545	chr16	+	1715057	1715139	1716073	1716178	1716422	1716601	ENSG00000007545:1716423-1716601:target	ENSG00000007545:1715058-1715139:source
ZNF263	ENSG00000006194	chr16	+	3332470	3334205	3336022	3336149	3338453	3338570	ENSG00000006194:3338454-3338570:target	ENSG00000006194:3332471-3334205:source
DNASE1	ENSG00000213918	chr16	+	3705373	3705521	3705849	3705938	3706102	3706186	ENSG00000213918:3705374-3705521:source	ENSG00000213918:3706071-3706186:target
METTL22	ENSG00000067365	chr16	+	8722756	8722967	8728895	8728936	8729024	8729169	ENSG00000067365:8729025-8729169:target	ENSG00000067365:8722757-8722967:source
UBFD1	ENSG00000103353	chr16	+	23570348	23570997	23571099	23571189	23573526	23573592	ENSG00000103353:23570349-23570997:source	ENSG00000103353:23573154-23573592:target
NFATC2IP	ENSG00000176953	chr16	+	28965885	28966003	28967298	28967379	28967471	28968033	ENSG00000176953:28967472-28968033:target	ENSG00000176953:28965886-28966003:source
CDIPT-AS1	ENSG00000214725	chr16	+	29876480	29876558	29876676	29876763	29879184	29879371	ENSG00000214725:29879185-29879371:target	ENSG00000214725:29876481-29876558:source
SEZ6L2	ENSG00000174938	chr16	-	29884560	29884752	29884025	29884064	29883729	29883847	ENSG00000174938:29883730-29883847:source	ENSG00000174938:29884561-29884752:target
LONP2	ENSG00000102910	chr16	+	48286041	48286276	48290520	48290652	48292528	48292651	ENSG00000102910:48292529-48292651:target	ENSG00000102910:48286042-48286276:source
CNEP1R1	ENSG00000205423	chr16	+	50058320	50059251	50059561	50059612	50060306	50060378	ENSG00000205423:50058321-50059256:source	ENSG00000205423:50060071-50060378:target
FHOD1	ENSG00000135723	chr16	-	67270459	67270636	67270313	67270337	67268259	67268375	ENSG00000135723:67270460-67270636:target	ENSG00000135723:67268260-67268657:source
SLC7A6	ENSG00000103064	chr16	+	68309029	68309152	68321225	68321289	68321648	68321774	ENSG00000103064:68309030-68309152:source	ENSG00000103064:68321649-68321774:target
PDXDC2P	ENSG00000196696	chr16	-	70016252	70016397	70012124	70012185	70011949	70012015	ENSG00000196696:70016253-70016397:target	ENSG00000196696:70011950-70012015:source
FANCA	ENSG00000187741	chr16	-	89865573	89865640	89865358	89865487	89862313	89862426	ENSG00000187741:89862314-89862426:source	ENSG00000187741:89865574-89865640:target
ENOSF1	ENSG00000132199	chr18	-	678695	678737	677742	677872	677344	677444	ENSG00000132199:678309-678737:target	ENSG00000132199:677345-677444:source
MTCL1	ENSG00000168502	chr18	+	8806890	8807058	8809445	8809559	8812976	8813231	ENSG00000168502:8812843-8813231:target	ENSG00000168502:8806891-8807058:source
SEH1L	ENSG00000085415	chr18	+	12963158	12963370	12963460	12963556	12971151	12971251	ENSG00000085415:12971152-12971251:target	ENSG00000085415:12963159-12963370:source
TMEM241	ENSG00000134490	chr18	-	20957609	20957635	20956790	20956905	20953675	20953727	ENSG00000134490:20953676-20953727:source	ENSG00000134490:20957610-20957635:target
C18orf21	ENSG00000141428	chr18	+	33552045	33552803	33552847	33552870	33554858	33555058	ENSG00000141428:33554859-33555058:target	ENSG00000141428:33552046-33552803:source
SETD5	ENSG00000168137	chr3	+	9475960	9476169	9476273	9476314	9476507	9476566	ENSG00000168137:9476508-9476566:target	ENSG00000168137:9475961-9476169:source
TTLL3	ENSG00000214021	chr3	+	9870846	9871079	9874787	9874929	9876364	9876591	ENSG00000214021:9876365-9876591:target	ENSG00000214021:9870847-9871079:source
SLC6A6	ENSG00000131389	chr3	+	14509360	14509464	14509595	14509720	14513712	14513825	ENSG00000131389:14513713-14513825:target	ENSG00000131389:14509361-14509464:source
METTL6	ENSG00000206562	chr3	-	15457278	15457449	15457004	15457090	15455527	15455669	ENSG00000206562:15457279-15457449:target	ENSG00000206562:15455528-15455669:source
NGLY1	ENSG00000151092	chr3	-	25770623	25772041	25761504	25761682	25760434	25761126	ENSG00000151092:25770624-25772041:target	ENSG00000151092:25760435-25761126:source
VILL	ENSG00000136059	chr3	+	38045554	38045890	38045990	38046119	38047282	38047465	ENSG00000136059:38045555-38045890:source	ENSG00000136059:38047283-38047465:target
NME6	ENSG00000172113	chr3	-	48338216	48338319	48337608	48337648	48336564	48336725	ENSG00000172113:48338217-48338319:target	ENSG00000172113:48336565-48336725:source
DALRD3	ENSG00000178149	chr3	-	49054206	49054283	49054044	49054106	49053861	49053944	ENSG00000178149:49053862-49053946:source	ENSG00000178149:49054170-49054283:target
MON1A	ENSG00000164077	chr3	-	49950652	49950792	49948958	49949444	49947551	49948317	ENSG00000164077:49947552-49948317:source	ENSG00000164077:49949830-49950792:target
PARP3	ENSG00000041880	chr3	+	51976360	51976724	51976945	51977062	51977364	51977554	ENSG00000041880:51976361-51976724:source	ENSG00000041880:51977315-51977554:target
ATXN7	ENSG00000163635	chr3	+	63981985	63982159	63983296	63983363	63985125	63987125	ENSG00000163635:63985126-63989138:target	ENSG00000163635:63981986-63982312:source
ATP2C1	ENSG00000017260	chr3	+	130612811	130613181	130613433	130613619	130649259	130649370	ENSG00000017260:130649260-130649370:target	ENSG00000017260:130612812-130613181:source
CEP70	ENSG00000114107	chr3	-	138218951	138219066	138216872	138216952	138213185	138213918	ENSG00000114107:138218726-138219066:target	ENSG00000114107:138213186-138213918:source
MYNN	ENSG00000085274	chr3	+	169490618	169491250	169491818	169491885	169492052	169492349	ENSG00000085274:169490619-169491250:source	ENSG00000085274:169492053-169492349:target
TBL1XR1	ENSG00000177565	chr3	-	176914908	176915261	176849150	176849237	176816253	176816329	ENSG00000177565:176816254-176816329:source	ENSG00000177565:176914909-176915261:target
DNAJC19	ENSG00000205981	chr3	-	180707387	180707562	180705965	180706017	180704967	180705884	ENSG00000205981:180707388-180707562:target	ENSG00000205981:180704968-180705884:source
PARL	ENSG00000175193	chr3	-	183558357	183558428	183551511	183551613	183551279	183551377	ENSG00000175193:183558358-183558428:target	ENSG00000175193:183551280-183551377:source
IGF2BP2	ENSG00000073792	chr3	-	185393083	185393219	185390328	185390457	185376128	185376197	ENSG00000073792:185392804-185393219:target	ENSG00000073792:185376129-185376197:source
TNK2	ENSG00000061938	chr3	-	195594231	195595168	195594039	195594135	195593759	195593887	ENSG00000061938:195594232-195595168:target	ENSG00000061938:195593760-195593887:source
SDHAP1	ENSG00000185485	chr3	-	195690170	195690292	195689386	195689498	195686618	195686957	ENSG00000185485:195689975-195690292:target	ENSG00000185485:195686619-195686957:source
SENP5	ENSG00000119231	chr3	+	196594726	196594944	196612021	196613565	196626536	196626642	ENSG00000119231:196626537-196626642:target	ENSG00000119231:196594727-196594944:source
AC024560.3	ENSG00000214135	chr3	-	197350090	197350253	197349057	197349201	197348574	197348739	ENSG00000214135:197348575-197348739:source	ENSG00000214135:197350091-197350253:target
SNHG14	ENSG00000224078	chr15	+	25304603	25304865	25306452	25306560	25307096	25307235	ENSG00000224078:25304604-25304865:source	ENSG00000224078:25307097-25307235:target
CASC4	ENSG00000166734	chr15	+	44673003	44673174	44695084	44695252	44705533	44705741	ENSG00000166734:44673004-44673174:source	ENSG00000166734:44705534-44705741:target
SHF	ENSG00000138606	chr15	-	45467416	45467524	45464080	45464200	45459411	45460331	ENSG00000138606:45459412-45460331:source	ENSG00000138606:45467417-45467524:target
USP8	ENSG00000138592	chr15	+	50716792	50716851	50724534	50724696	50731205	50731374	ENSG00000138592:50716793-50716851:source	ENSG00000138592:50731206-50731374:target
MYO5A	ENSG00000197535	chr15	-	52632392	52632591	52630006	52630081	52628659	52628753	ENSG00000197535:52628660-52628753:source	ENSG00000197535:52632393-52632591:target
FAM96A	ENSG00000166797	chr15	-	64380885	64381050	64373300	64373350	64366516	64367736	ENSG00000166797:64366517-64367736:source	ENSG00000166797:64380886-64381050:target
KIF23	ENSG00000137807	chr15	+	69732646	69732826	69733106	69733418	69737128	69737380	ENSG00000137807:69735944-69737380:target	ENSG00000137807:69732647-69732826:source
FAM219B	ENSG00000178761	chr15	-	75197494	75197572	75197322	75197400	75197004	75197053	ENSG00000178761:75197495-75197572:target	ENSG00000178761:75197005-75197053:source
ENSG00000259387	ENSG00000259387	chr15	+	82921003	82921171	82921322	82921411	82923924	82924290	ENSG00000259387:82921004-82921171:source	ENSG00000259387:82923925-82924290:target
WDR73	ENSG00000177082	chr15	-	85189414	85189579	85189203	85189316	85188185	85189067	ENSG00000177082:85188186-85189067:source	ENSG00000177082:85189415-85189579:target
HAPLN3	ENSG00000140511	chr15	-	89424587	89424956	89422648	89423841	89422197	89422500	ENSG00000140511:89422198-89422500:source	ENSG00000140511:89424376-89424956:target
MFGE8	ENSG00000140545	chr15	-	89444781	89445462	89442886	89443042	89442528	89442763	ENSG00000140545:89442529-89442763:source	ENSG00000140545:89444543-89445462:target
RAD52	ENSG00000002016	chr12	-	1036310	1036429	1035961	1036112	1034615	1034691	ENSG00000002016:1034616-1034691:source	ENSG00000002016:1036311-1036429:target
ZNF384	ENSG00000126746	chr12	-	6788111	6788349	6787828	6787876	6787597	6787626	ENSG00000126746:6787598-6787708:source	ENSG00000126746:6787976-6788349:target
CDCA3	ENSG00000111665	chr12	-	6958728	6959022	6958486	6958593	6958238	6958362	ENSG00000111665:6958239-6958362:source	ENSG00000111665:6958715-6959022:target
C1RL-AS1	ENSG00000205885	chr12	+	7267725	7267815	7267981	7271273	7271494	7271763	ENSG00000205885:7267726-7267815:source	ENSG00000205885:7271495-7271763:target
PEX5	ENSG00000139197	chr12	+	7354330	7354437	7354836	7354947	7355207	7355300	ENSG00000139197:7355208-7355300:target	ENSG00000139197:7354331-7354822:source
DDX12P	ENSG00000214826	chr12	-	9590606	9590855	9590270	9590487	9589998	9590085	ENSG00000214826:9590607-9590855:target	ENSG00000214826:9589999-9590085:source
GOLT1B	ENSG00000111711	chr12	+	21659818	21659910	21660050	21660085	21661316	21661495	ENSG00000111711:21659819-21659910:source	ENSG00000111711:21661091-21661495:target
KLHL42	ENSG00000087448	chr12	+	27944640	27944834	27950179	27950282	27950647	27952647	ENSG00000087448:27950648-27955973:target	ENSG00000087448:27944641-27945076:source
DNM1L	ENSG00000087470	chr12	+	32890038	32890095	32891197	32891230	32892997	32893174	ENSG00000087470:32890039-32890240:source	ENSG00000087470:32892779-32893174:target
HDAC7	ENSG00000061273	chr12	-	48189989	48190081	48189688	48189799	48189449	48189550	ENSG00000061273:48189990-48190081:target	ENSG00000061273:48189450-48189633:source
CSAD	ENSG00000139631	chr12	-	53555056	53555173	53554910	53554975	53554546	53554628	ENSG00000139631:53554547-53554628:source	ENSG00000139631:53555057-53555173:target
CSAD	ENSG00000139631	chr12	-	53563855	53564160	53558499	53558539	53555056	53555173	ENSG00000139631:53563855-53564160:target	ENSG00000139631:53555057-53555173:source
AAAS	ENSG00000094914	chr12	-	53708877	53709027	53708534	53708633	53708081	53708225	ENSG00000094914:53708878-53709027:target	ENSG00000094914:53708082-53708225:source
HNRNPA1	ENSG00000135486	chr12	+	54673976	54674606	54675169	54675286	54675578	54675725	ENSG00000135486:54675579-54675725:target	ENSG00000135486:54673977-54674606:source
CDK2	ENSG00000123374	chr12	+	56362561	56362732	56363258	56363360	56364827	56364883	ENSG00000123374:56364828-56364883:target	ENSG00000123374:56362562-56362732:source
STAT2	ENSG00000170581	chr12	-	56748249	56748291	56745075	56745234	56744881	56744974	ENSG00000170581:56748203-56748291:target	ENSG00000170581:56744882-56744974:source
R3HDM2	ENSG00000179912	chr12	-	57691872	57691951	57691110	57691170	57690193	57690334	ENSG00000179912:57691787-57691951:target	ENSG00000179912:57690194-57690816:source
PPP1R12A	ENSG00000058272	chr12	-	80201005	80201110	80199945	80200113	80199371	80199548	ENSG00000058272:80200596-80201110:target	ENSG00000058272:80199372-80199596:source
CEP83	ENSG00000173588	chr12	-	94805472	94805623	94804396	94804455	94796326	94797038	ENSG00000173588:94805473-94805623:target	ENSG00000173588:94796327-94797038:source
GOLGA2P5	ENSG00000238105	chr12	-	100561113	100561221	100560847	100560919	100560108	100560411	ENSG00000238105:100561114-100561221:target	ENSG00000238105:100560109-100560441:source
PARPBP	ENSG00000185480	chr12	+	102547646	102547754	102558215	102558386	102559506	102559661	ENSG00000185480:102559507-102559661:target	ENSG00000185480:102547647-102547767:source
TMEM116	ENSG00000198270	chr12	-	112374963	112375047	112374495	112374634	112371689	112371834	ENSG00000198270:112374964-112375047:target	ENSG00000198270:112371690-112371834:source
ABCB9	ENSG00000150967	chr12	-	123428937	123429066	123425353	123425542	123423995	123424831	ENSG00000150967:123428938-123429066:target	ENSG00000150967:123423996-123424831:source
SCML2	ENSG00000102098	chrX	-	18264696	18264972	18260558	18260710	18259132	18259499	ENSG00000102098:18264697-18264972:target	ENSG00000102098:18259133-18259499:source
PORCN	ENSG00000102312	chrX	+	48367349	48367491	48367811	48368095	48368171	48368344	ENSG00000102312:48367350-48367491:source	ENSG00000102312:48368166-48368344:target
RRAGB	ENSG00000083750	chrX	+	55777533	55777629	55778678	55778786	55779824	55779947	ENSG00000083750:55779825-55779947:target	ENSG00000083750:55777534-55778056:source
LAS1L	ENSG00000001497	chrX	-	64744844	64744930	64744443	64744494	64743935	64744142	ENSG00000001497:64744845-64744930:target	ENSG00000001497:64743936-64744142:source
MED12	ENSG00000184634	chrX	+	70345200	70345345	70345512	70345563	70345885	70346004	ENSG00000184634:70345886-70346004:target	ENSG00000184634:70345201-70345345:source
JPX	ENSG00000225470	chrX	+	73218602	73218679	73218788	73220331	73224104	73224386	ENSG00000225470:73224105-73224386:target	ENSG00000225470:73218603-73218679:source
RBM41	ENSG00000089682	chrX	-	106356626	106356698	106331964	106332069	106312539	106312632	ENSG00000089682:106356627-106356698:target	ENSG00000089682:106312540-106312632:source
2017-09-06	ENSG00000125354	chrX	-	118763280	118763471	118759297	118759342	118753271	118754014	ENSG00000125354:118753272-118754014:source	ENSG00000125354:118762779-118763471:target
OCRL	ENSG00000122126	chrX	+	128710293	128710529	128718320	128718344	128720978	128721095	ENSG00000122126:128710294-128710529:source	ENSG00000122126:128720979-128721095:target
BCORL1	ENSG00000085185	chrX	+	129139163	129139293	129144483	129144639	129146553	129146644	ENSG00000085185:129146554-129146644:target	ENSG00000085185:129139164-129139293:source
IGSF1	ENSG00000147255	chrX	-	130420578	130420715	130420410	130420437	130419740	130420022	ENSG00000147255:130420579-130420715:target	ENSG00000147255:130419741-130420022:source
AFF2	ENSG00000155966	chrX	+	147891399	147891444	147919170	147919257	147924489	147924526	ENSG00000155966:147891400-147891444:source	ENSG00000155966:147924490-147924526:target
MTMR1	ENSG00000063601	chrX	+	149867667	149867773	149880813	149880837	149887096	149887172	ENSG00000063601:149887097-149887172:target	ENSG00000063601:149867668-149867773:source
ARHGAP4	ENSG00000089820	chrX	-	153184285	153184507	153179231	153179333	153178977	153179054	ENSG00000089820:153184286-153184507:target	ENSG00000089820:153178978-153179054:source
UVSSA	ENSG00000163945	chr4	+	1373834	1374018	1374439	1374535	1374667	1374776	ENSG00000163945:1373835-1374018:source	ENSG00000163945:1374668-1374776:target
SGCB	ENSG00000163069	chr4	-	52899596	52899806	52898040	52898127	52895843	52896029	ENSG00000163069:52899597-52899806:target	ENSG00000163069:52895844-52896029:source
HNRNPDL	ENSG00000152795	chr4	-	83347189	83347282	83346715	83346820	83344036	83346036	ENSG00000152795:83343717-83346036:source	ENSG00000152795:83347190-83347282:target
SEC31A	ENSG00000138674	chr4	-	83765538	83765662	83763292	83763634	83749917	83750211	ENSG00000138674:83749918-83750566:source	ENSG00000138674:83764838-83765662:target
CENPE	ENSG00000138778	chr4	-	104061412	104061571	104060945	104061236	104059507	104059606	ENSG00000138778:104059508-104059609:source	ENSG00000138778:104061413-104061571:target
ZGRF1	ENSG00000138658	chr4	-	113527163	113527247	113524679	113524853	113510785	113511030	ENSG00000138658:113526716-113527247:target	ENSG00000138658:113510786-113511030:source
EXOSC9	ENSG00000123737	chr4	+	122734909	122735202	122737298	122737349	122737523	122737602	ENSG00000123737:122737524-122737602:target	ENSG00000123737:122734910-122735782:source
SCLT1	ENSG00000151466	chr4	-	129867161	129867307	129864150	129864343	129857809	129858006	ENSG00000151466:129857810-129858006:source	ENSG00000151466:129867162-129867307:target
HHIP-AS1	ENSG00000248890	chr4	-	145566858	145567139	145566439	145566619	145564073	145564886	ENSG00000248890:145564074-145564886:source	ENSG00000248890:145566859-145567139:target
NEK1	ENSG00000137601	chr4	-	170477082	170477246	170476870	170477002	170458959	170459062	ENSG00000137601:170477083-170477246:target	ENSG00000137601:170458960-170459062:source
CEP44	ENSG00000164118	chr4	+	175237316	175237441	175237680	175237718	175238485	175239816	ENSG00000164118:175238486-175239816:target	ENSG00000164118:175237317-175237441:source
NCOA1	ENSG00000084676	chr2	+	24985555	24985645	24990947	24991004	24991089	24993089	ENSG00000084676:24985556-24985645:source	ENSG00000084676:24991090-24993571:target
SLC30A6	ENSG00000152683	chr2	+	32418957	32419052	32422412	32422461	32422775	32422895	ENSG00000152683:32422776-32422895:target	ENSG00000152683:32418958-32419052:source
NDUFAF7	ENSG00000003509	chr2	+	37468720	37468780	37469777	37469836	37471005	37471116	ENSG00000003509:37471006-37471116:target	ENSG00000003509:37468721-37469567:source
THADA	ENSG00000115970	chr2	-	43793836	43793960	43787372	43787524	43779206	43779478	ENSG00000115970:43789357-43793960:target	ENSG00000115970:43779207-43779478:source
PCBP1-AS1	ENSG00000179818	chr2	-	70312678	70312756	70310669	70310819	70286774	70286812	ENSG00000179818:70286775-70287238:source	ENSG00000179818:70312679-70312756:target
TEX261	ENSG00000144043	chr2	-	71220825	71220905	71218959	71219113	71216878	71216946	ENSG00000144043:71216879-71216946:source	ENSG00000144043:71220826-71220905:target
FBXO41	ENSG00000163013	chr2	-	73493584	73493932	73493020	73493094	73492409	73492768	ENSG00000163013:73492410-73492768:source	ENSG00000163013:73493585-73493932:target
TTC31	ENSG00000115282	chr2	+	74710448	74710537	74717151	74717254	74717370	74717600	ENSG00000115282:74710449-74710832:source	ENSG00000115282:74717371-74717600:target
TTC31	ENSG00000115282	chr2	+	74717370	74717600	74717782	74717866	74718254	74718311	ENSG00000115282:74718255-74718311:target	ENSG00000115282:74717371-74717600:source
ARID5A	ENSG00000196843	chr2	+	97213126	97213254	97215057	97215196	97215489	97215542	ENSG00000196843:97213127-97213254:source	ENSG00000196843:97215490-97215542:target
FAHD2B	ENSG00000144199	chr2	-	97760437	97760619	97757599	97757725	97757198	97757449	ENSG00000144199:97757199-97757449:source	ENSG00000144199:97760438-97760619:target
TMEM131	ENSG00000075568	chr2	-	98412680	98412867	98411392	98411578	98409752	98410016	ENSG00000075568:98412681-98412867:target	ENSG00000075568:98409753-98410016:source
REV1	ENSG00000135945	chr2	-	100046301	100046410	100041234	100041361	100040613	100040742	ENSG00000135945:100040614-100041096:source	ENSG00000135945:100046302-100046410:target
SLC20A1	ENSG00000144136	chr2	+	113409846	113410375	113410465	113410524	113414698	113414818	ENSG00000144136:113409847-113410375:source	ENSG00000144136:113414699-113414818:target
CBWD2	ENSG00000136682	chr2	+	114222705	114222750	114224059	114224143	114228609	114228666	ENSG00000136682:114222706-114222750:source	ENSG00000136682:114226162-114228666:target
RABL2A	ENSG00000144134	chr2	+	114391729	114391809	114392627	114392707	114398929	114399057	ENSG00000144134:114391730-114392197:source	ENSG00000144134:114398930-114399057:target
DPP10	ENSG00000175497	chr2	+	116510749	116510873	116520147	116520186	116525872	116525980	ENSG00000175497:116510750-116510873:source	ENSG00000175497:116525873-116525980:target
AC093838.4	ENSG00000152117	chr2	+	132277107	132277239	132277386	132277515	132277669	132279146	ENSG00000152117:132277108-132277239:source	ENSG00000152117:132277670-132279146:target
PKP4	ENSG00000144283	chr2	+	159530394	159530512	159533250	159533379	159535092	159535166	ENSG00000144283:159535093-159535166:target	ENSG00000144283:159530395-159530512:source
SCN3A	ENSG00000153253	chr2	-	166043060	166043257	166036061	166036201	166032640	166032954	ENSG00000153253:166043061-166043257:target	ENSG00000153253:166032641-166032954:source
TTN-AS1	ENSG00000237298	chr2	+	179388018	179388363	179396040	179396305	179400458	179400555	ENSG00000237298:179388019-179388363:source	ENSG00000237298:179400459-179400555:target
TFPI	ENSG00000003436	chr2	-	188418926	188419219	188394090	188394212	188368374	188368497	ENSG00000003436:188418927-188419219:target	ENSG00000003436:188368375-188368497:source
FAM126B	ENSG00000155744	chr2	-	201887553	201888068	201886781	201886837	201881713	201881893	ENSG00000155744:201881714-201881893:source	ENSG00000155744:201887204-201888068:target
CASP10	ENSG00000003400	chr2	+	202060564	202060671	202068452	202068489	202072797	202072906	ENSG00000003400:202060565-202060738:source	ENSG00000003400:202072798-202072906:target
TMBIM1	ENSG00000135926	chr2	-	219157188	219157309	219150485	219150661	219146662	219146904	ENSG00000135926:219146663-219146931:source	ENSG00000135926:219157189-219157309:target
STK36	ENSG00000163482	chr2	+	219540751	219541001	219543890	219543984	219544282	219544452	ENSG00000163482:219544283-219544452:target	ENSG00000163482:219540752-219541001:source
TTLL4	ENSG00000135912	chr2	+	219575716	219575760	219591991	219592070	219602301	219603886	ENSG00000135912:219575717-219575760:source	ENSG00000135912:219602297-219603886:target
SPEG	ENSG00000072195	chr2	+	220315391	220316001	220316346	220316529	220326603	220326779	ENSG00000072195:220315392-220316001:source	ENSG00000072195:220326604-220326779:target
MTERF4	ENSG00000122085	chr2	-	242036657	242036842	242035807	242035853	242033820	242033847	ENSG00000122085:242036341-242036842:target	ENSG00000122085:242033821-242033847:source
2017-09-02	ENSG00000168385	chr2	+	242263568	242263656	242263823	242264077	242265407	242265528	ENSG00000168385:242265382-242265528:target	ENSG00000168385:242263569-242263656:source
IL11RA	ENSG00000137070	chr9	+	34660500	34660597	34660850	34660933	34661478	34661889	ENSG00000137070:34660501-34660597:source	ENSG00000137070:34661205-34661889:target
TPM2	ENSG00000198467	chr9	-	35685060	35685136	35684728	35684804	35684484	35684547	ENSG00000198467:35685061-35685136:target	ENSG00000198467:35684485-35684547:source
PTAR1	ENSG00000188647	chr9	-	72356707	72356774	72355636	72355692	72349065	72349170	ENSG00000188647:72349066-72349174:source	ENSG00000188647:72356432-72356774:target
SEMA4D	ENSG00000187764	chr9	-	92070802	92070868	92033277	92033352	92032970	92033033	ENSG00000187764:92032971-92033148:source	ENSG00000187764:92070803-92070868:target
AUH	ENSG00000148090	chr9	-	94123909	94124195	94122652	94122722	94118369	94118437	ENSG00000148090:94123910-94124195:target	ENSG00000148090:94118370-94118437:source
FKTN	ENSG00000106692	chr9	+	108335935	108336027	108336478	108336559	108337225	108337299	ENSG00000106692:108337198-108337299:target	ENSG00000106692:108335936-108336027:source
PHF19	ENSG00000119403	chr9	-	123639368	123639606	123638158	123638280	123636833	123637034	ENSG00000119403:123636834-123637034:source	ENSG00000119403:123639369-123639606:target
TOR2A	ENSG00000160404	chr9	-	130495663	130495839	130494842	130494970	130493802	130494557	ENSG00000160404:130493803-130494557:source	ENSG00000160404:130495664-130495839:target
PTGES2	ENSG00000148334	chr9	-	130887522	130887615	130887057	130887150	130886609	130886829	ENSG00000148334:130887523-130887615:target	ENSG00000148334:130886610-130886829:source
GOLGA2	ENSG00000167110	chr9	-	131029736	131029796	131029472	131029553	131028565	131028604	ENSG00000167110:131028566-131028604:source	ENSG00000167110:131029737-131029796:target
ODF2	ENSG00000136811	chr9	+	131218335	131218534	131219476	131219716	131221845	131221936	ENSG00000136811:131218336-131218534:source	ENSG00000136811:131221846-131221936:target
SPTAN1	ENSG00000197694	chr9	+	131371400	131371563	131371929	131371944	131373992	131374124	ENSG00000197694:131373993-131374124:target	ENSG00000197694:131371401-131371568:source
NTMT1	ENSG00000148335	chr9	+	132388451	132388574	132394928	132395144	132396332	132396585	ENSG00000148335:132388452-132388600:source	ENSG00000148335:132396333-132396585:target
RALGDS	ENSG00000160271	chr9	-	135981318	135981403	135979834	135980031	135979649	135979718	ENSG00000160271:135979650-135979718:source	ENSG00000160271:135981319-135981403:target
DPH7	ENSG00000148399	chr9	-	140459536	140459945	140459344	140459410	140458885	140459058	ENSG00000148399:140459537-140459945:target	ENSG00000148399:140458886-140459058:source
DPH7	ENSG00000148399	chr9	-	140471921	140472055	140470760	140470854	140470531	140470619	ENSG00000148399:140470532-140470619:source	ENSG00000148399:140471922-140472055:target
XPO4	ENSG00000132953	chr13	-	21442734	21442840	21437107	21437262	21436855	21436997	ENSG00000132953:21442552-21442840:target	ENSG00000132953:21436856-21436997:source
CENPJ	ENSG00000151849	chr13	-	25463453	25463538	25460406	25460523	25459743	25459808	ENSG00000151849:25459744-25460217:source	ENSG00000151849:25463308-25463538:target
NAA16	ENSG00000172766	chr13	+	41936166	41936295	41936866	41937009	41941574	41941788	ENSG00000172766:41936167-41936295:source	ENSG00000172766:41941575-41941788:target
TPT1-AS1	ENSG00000170919	chr13	+	45956959	45957370	45957894	45957973	45963869	45963955	ENSG00000170919:45956960-45957370:source	ENSG00000170919:45961720-45963955:target
TPT1-AS1	ENSG00000170919	chr13	+	45961955	45963955	45964848	45965037	45965166	45965872	ENSG00000170919:45961720-45963955:source	ENSG00000170919:45965167-45965872:target
CDADC1	ENSG00000102543	chr13	+	49829974	49830049	49833481	49833659	49841625	49842195	ENSG00000102543:49829975-49830051:source	ENSG00000102543:49841626-49842195:target
PIBF1	ENSG00000083535	chr13	+	73539411	73539542	73547728	73547813	73572959	73573133	ENSG00000083535:73539412-73539542:source	ENSG00000083535:73572960-73573133:target
CARKD	ENSG00000213995	chr13	+	111276580	111276626	111277536	111277625	111279785	111279894	ENSG00000213995:111276581-111276626:source	ENSG00000213995:111279786-111279894:target
MLLT10	ENSG00000078403	chr10	+	21970260	21970305	21971153	21971186	22002700	22002879	ENSG00000078403:22002701-22002879:target	ENSG00000078403:21970261-21970305:source
ACBD5	ENSG00000107897	chr10	-	27512266	27512381	27512135	27512168	27508651	27508786	ENSG00000107897:27512267-27512381:target	ENSG00000107897:27508652-27508786:source
FAM21A	ENSG00000099290	chr10	+	51885816	51885939	51886919	51886982	51887342	51887555	ENSG00000099290:51887343-51887555:target	ENSG00000099290:51885817-51886268:source
PPP3CB	ENSG00000107758	chr10	-	75204482	75204580	75199629	75199659	75196185	75198178	ENSG00000107758:75203538-75204580:target	ENSG00000107758:75196186-75198178:source
MMS19	ENSG00000155229	chr10	-	99229402	99229480	99229274	99229305	99228008	99228163	ENSG00000155229:99229403-99229480:target	ENSG00000155229:99228009-99228163:source
SEC31B	ENSG00000075826	chr10	-	102250462	102250640	102249764	102250079	102249459	102249518	ENSG00000075826:102250463-102250640:target	ENSG00000075826:102249460-102249518:source
SEC31B	ENSG00000075826	chr10	-	102262010	102262241	102259866	102259916	102259173	102259355	ENSG00000075826:102262011-102262241:target	ENSG00000075826:102259174-102259355:source
TMEM180	ENSG00000138111	chr10	+	104229749	104229832	104230421	104230874	104231029	104231153	ENSG00000138111:104231030-104231153:target	ENSG00000138111:104229750-104229832:source
SFXN2	ENSG00000156398	chr10	+	104486743	104486914	104487431	104487548	104488187	104488333	ENSG00000156398:104488188-104488333:target	ENSG00000156398:104486744-104486914:source
SFXN2	ENSG00000156398	chr10	+	104488187	104488286	104489075	104489151	104489479	104489565	ENSG00000156398:104488188-104488333:source	ENSG00000156398:104489480-104489565:target
NT5C2	ENSG00000076685	chr10	-	104860801	104860859	104860508	104860700	104859682	104859776	ENSG00000076685:104859683-104859776:source	ENSG00000076685:104860802-104860859:target
SLK	ENSG00000065613	chr10	+	105761201	105761330	105761929	105763285	105765318	105765449	ENSG00000065613:105761202-105761330:source	ENSG00000065613:105765319-105765449:target
ADD3	ENSG00000148700	chr10	+	111890120	111890244	111892062	111892158	111893083	111895083	ENSG00000148700:111893084-111895323:target	ENSG00000148700:111890121-111890244:source
ATP6AP1L	ENSG00000205464	chr5	+	81599592	81599651	81599846	81599924	81600433	81600669	ENSG00000205464:81600434-81600669:target	ENSG00000205464:81599593-81599651:source
DDX46	ENSG00000145833	chr5	+	134124202	134124281	134125795	134125912	134126159	134126242	ENSG00000145833:134126160-134126242:target	ENSG00000145833:134124203-134124281:source
FAM13B	ENSG00000031003	chr5	-	137284643	137284873	137281916	137282000	137281590	137281686	ENSG00000031003:137281591-137281686:source	ENSG00000031003:137284644-137284873:target
MATR3	ENSG00000015479	chr5	+	138614739	138614818	138615623	138615747	138618427	138618933	ENSG00000015479:138618428-138618933:target	ENSG00000015479:138614740-138615077:source
CYFIP2	ENSG00000055163	chr5	+	156787289	156787380	156787562	156787630	156788475	156788606	ENSG00000055163:156787290-156787380:source	ENSG00000055163:156788413-156788606:target
FAM193B	ENSG00000146067	chr5	-	176959443	176959642	176958282	176958522	176951774	176952206	ENSG00000146067:176951775-176952488:source	ENSG00000146067:176959444-176959642:target
FAM193B	ENSG00000146067	chr5	-	176959443	176959642	176959156	176959201	176958282	176958522	ENSG00000146067:176959444-176959642:target	ENSG00000146067:176958283-176958835:source
FAM193B	ENSG00000146067	chr5	-	176959443	176959642	176958953	176959132	176958282	176958522	ENSG00000146067:176958283-176958835:source	ENSG00000146067:176959444-176959642:target
PHYKPL	ENSG00000175309	chr5	-	177641796	177641886	177639973	177640104	177637968	177638971	ENSG00000175309:177637969-177638971:source	ENSG00000175309:177641797-177641886:target
PHYKPL	ENSG00000175309	chr5	-	177652355	177653080	177651642	177651730	177651512	177651565	ENSG00000175309:177651513-177651565:source	ENSG00000175309:177652356-177653080:target

## Sheet: CELF2 unresponsive
#GeneName	EnsemblID	chromsome	strand	C1start	C1end	Astart	Aend	C2start	C2end	LSV1	LSV2
SUN1	ENSG00000164828	chr7	+	908111	909153	912106	912199	912851	914557	ENSG00000164828:908111-909153:source	ENSG00000164828:912852-914557:target
BRAT1	ENSG00000106009	chr7	-	2582837	2582957	2582612	2582638	2581754	2581845	ENSG00000106009:2581754-2581845:source	ENSG00000106009:2582838-2582957:target
IQCE	ENSG00000106012	chr7	+	2611826	2611960	2612347	2612455	2613051	2613122	ENSG00000106012:2611826-2611960:source	ENSG00000106012:2613052-2613122:target
TTYH3	ENSG00000136295	chr7	+	2698574	2698649	2699573	2699674	2701301	2703301	ENSG00000136295:2698574-2698649:source	ENSG00000136295:2701302-2704436:target
WIPI2	ENSG00000157954	chr7	+	5256194	5256290	5256379	5256494	5256720	5256818	ENSG00000157954:5256194-5256290:source	ENSG00000157954:5256721-5256818:target
SLC29A4	ENSG00000164638	chr7	+	5334491	5334565	5335964	5335997	5336566	5336829	ENSG00000164638:5334491-5334565:source	ENSG00000164638:5336567-5336829:target
RNF216	ENSG00000011275	chr7	-	5778906	5779256	5772600	5772793	5770346	5770448	ENSG00000011275:5770346-5770448:source	ENSG00000011275:5778907-5779256:target
CYTH3	ENSG00000008256	chr7	-	6230079	6230162	6228335	6228520	6227288	6227352	ENSG00000008256:6227288-6227352:source	ENSG00000008256:6230080-6230162:target
RAC1	ENSG00000136238	chr7	+	6414154	6414401	6415489	6415547	6426842	6426914	ENSG00000136238:6414154-6414401:source	ENSG00000136238:6426843-6426914:target
BZW2	ENSG00000136261	chr7	+	16705062	16705126	16714036	16714213	16720925	16721029	ENSG00000136261:16705062-16705126:source	ENSG00000136261:16720926-16721029:target
SNX13	ENSG00000071189	chr7	-	17915291	17915413	17915102	17915204	17913151	17913239	ENSG00000071189:17913151-17913239:source	ENSG00000071189:17915292-17915413:target
HDAC9	ENSG00000048052	chr7	+	18688089	18688306	18694385	18694492	18705835	18707835	ENSG00000048052:18688089-18688306:source	ENSG00000048052:18705836-18708466:target
FAM221A	ENSG00000188732	chr7	+	23740405	23740487	23741198	23741306	23741714	23742269	ENSG00000188732:23740405-23740487:source	ENSG00000188732:23741715-23742269:target
OSBPL3	ENSG00000070882	chr7	-	24880308	24880402	24876114	24876225	24873706	24874355	ENSG00000070882:24873706-24874355:source	ENSG00000070882:24880309-24880402:target
NOD1	ENSG00000106100	chr7	-	30468989	30469073	30468119	30468225	30464143	30465326	ENSG00000106100:30464143-30465326:source	ENSG00000106100:30468990-30469073:target
GARS	ENSG00000106105	chr7	+	30634297	30634759	30635439	30635549	30638411	30638513	ENSG00000106105:30634297-30634759:source	ENSG00000106105:30638412-30638513:target
AVL9	ENSG00000105778	chr7	+	32582753	32582873	32584305	32584391	32588458	32588530	ENSG00000105778:32582753-32582873:source	ENSG00000105778:32588459-32588530:target
BBS9	ENSG00000122507	chr7	+	33384193	33384246	33385838	33385982	33388679	33388782	ENSG00000122507:33384193-33384246:source	ENSG00000122507:33388680-33388782:target
DPY19L1	ENSG00000173852	chr7	-	34978887	34978987	34977605	34977731	34969341	34971341	ENSG00000173852:34968488-34971341:source	ENSG00000173852:34978888-34978987:target
ELMO1	ENSG00000155849	chr7	-	37298785	37298955	37283960	37283996	37272700	37272799	ENSG00000155849:37272700-37272799:source	ENSG00000155849:37298786-37298955:target
VPS41	ENSG00000006715	chr7	-	38902144	38902222	38869853	38869928	38860803	38860865	ENSG00000006715:38860803-38860865:source	ENSG00000006715:38902145-38902222:target
CDK13	ENSG00000065883	chr7	+	40102425	40102526	40102621	40102699	40117603	40117720	ENSG00000065883:40102425-40102526:source	ENSG00000065883:40117604-40117720:target
PSMA2	ENSG00000256646	chr7	-	42966981	42967058	42966134	42966267	42964274	42964396	ENSG00000256646:42964274-42964396:source	ENSG00000256646:42966982-42967058:target
ASL	ENSG00000126522	chr7	+	65554599	65554682	65556712	65556796	65556992	65557073	ENSG00000126522:65554599-65554682:source	ENSG00000126522:65556993-65557073:target
EIF4H	ENSG00000106682	chr7	+	73588575	73588772	73601940	73602128	73604002	73604067	ENSG00000106682:73588575-73588772:source	ENSG00000106682:73604003-73604067:target
GTF2IRD1	ENSG00000006704	chr7	+	73960074	73960139	73961432	73961616	73969503	73969553	ENSG00000006704:73960074-73960139:source	ENSG00000006704:73969504-73969553:target
ENSG00000135213	ENSG00000135213	chr7	-	75066792	75066964	75055643	75055735	75054815	75054991	ENSG00000135213:75054815-75054991:source	ENSG00000135213:75066793-75066964:target
PHTF2	ENSG00000006576	chr7	+	77522925	77522981	77523298	77523310	77530027	77530097	ENSG00000006576:77522925-77522981:source	ENSG00000006576:77530028-77530097:target
PHTF2	ENSG00000006576	chr7	+	77572017	77572103	77578994	77579150	77580933	77581029	ENSG00000006576:77572017-77572103:source	ENSG00000006576:77580934-77581029:target
KRIT1	ENSG00000001631	chr7	-	91864121	91864237	91863762	91863906	91855840	91855996	ENSG00000001631:91855840-91855996:source	ENSG00000001631:91864122-91864237:target
PEX1	ENSG00000127980	chr7	-	92129017	92129152	92127237	92127352	92126027	92126091	ENSG00000127980:92126027-92126091:source	ENSG00000127980:92129018-92129152:target
TRRAP	ENSG00000196367	chr7	+	98524790	98524989	98526415	98526539	98527611	98527829	ENSG00000196367:98524790-98524989:source	ENSG00000196367:98527612-98527829:target
TRRAP	ENSG00000196367	chr7	+	98554022	98554156	98555603	98555714	98556966	98557113	ENSG00000196367:98554022-98554156:source	ENSG00000196367:98556967-98557113:target
TRRAP	ENSG00000196367	chr7	+	98559925	98560050	98560391	98560463	98562251	98562398	ENSG00000196367:98559925-98560050:source	ENSG00000196367:98562252-98562398:target
SMURF1	ENSG00000198742	chr7	-	98648979	98649064	98648537	98648615	98647186	98647332	ENSG00000198742:98647186-98647332:source	ENSG00000198742:98648980-98649064:target
GATS	ENSG00000239521	chr7	-	99821504	99821698	99821192	99821321	99820097	99820343	ENSG00000239521:99820097-99820343:source	ENSG00000239521:99821505-99821698:target
FIS1	ENSG00000214253	chr7	-	100884110	100884187	100883422	100883528	100882739	100883184	ENSG00000214253:100882739-100883184:source	ENSG00000214253:100884111-100884187:target
PSMC2	ENSG00000161057	chr7	+	103004590	103004754	103006522	103006610	103007859	103008062	ENSG00000161057:103004590-103004754:source	ENSG00000161057:103007860-103008062:target
KMT2E	ENSG00000005483	chr7	+	104722135	104722244	104729672	104729808	104730455	104730720	ENSG00000005483:104722135-104722244:source	ENSG00000005483:104730456-104730720:target
PUS7	ENSG00000091127	chr7	-	105108783	105108910	105105759	105105861	105103068	105103197	ENSG00000091127:105103068-105103197:source	ENSG00000091127:105108784-105108910:target
PRKAR2B	ENSG00000005249	chr7	+	106797429	106797494	106797630	106797769	106799893	106801893	ENSG00000005249:106797429-106797494:source	ENSG00000005249:106799894-106802256:target
ST7	ENSG00000004866	chr7	+	116829375	116829447	116830186	116830322	116830887	116830990	ENSG00000004866:116829375-116829447:source	ENSG00000004866:116830888-116830990:target
AASS	ENSG00000008311	chr7	-	121719650	121719766	121719202	121719381	121718916	121719004	ENSG00000008311:121718916-121719004:source	ENSG00000008311:121719651-121719766:target
SND1	ENSG00000197157	chr7	+	127544679	127544872	127568112	127568239	127569240	127569382	ENSG00000197157:127544679-127544872:source	ENSG00000197157:127569241-127569382:target
RBM28	ENSG00000106344	chr7	-	127970871	127970981	127965870	127965944	127964612	127964747	ENSG00000106344:127964612-127964747:source	ENSG00000106344:127970872-127970981:target
METTL2B	ENSG00000165055	chr7	+	128133858	128133997	128138089	128138196	128140956	128141022	ENSG00000165055:128133858-128133997:source	ENSG00000165055:128140957-128141022:target
CALU	ENSG00000128595	chr7	+	128399846	128399906	128407509	128407709	128409116	128411116	ENSG00000128595:128399846-128399906:source	ENSG00000128595:128409117-128411531:target
ATP6V1F	ENSG00000128524	chr7	+	128502880	128503116	128505173	128505257	128505430	128505898	ENSG00000128524:128502880-128503116:source	ENSG00000128524:128505431-128505898:target
TNPO3	ENSG00000064419	chr7	-	128630014	128630256	128626782	128626974	128624222	128624313	ENSG00000064419:128624222-128624313:source	ENSG00000064419:128630015-128630256:target
TNPO3	ENSG00000064419	chr7	-	128655032	128655189	128645069	128645213	128641113	128641288	ENSG00000064419:128641113-128641288:source	ENSG00000064419:128655033-128655189:target
NRF1	ENSG00000106459	chr7	+	129297183	129297414	129311268	129311383	129317471	129317598	ENSG00000106459:129297183-129297414:source	ENSG00000106459:129317472-129317598:target
CHCHD3	ENSG00000106554	chr7	-	132709305	132709387	132707165	132707255	132659914	132660046	ENSG00000106554:132659914-132660046:source	ENSG00000106554:132709306-132709387:target
SLC35B4	ENSG00000205060	chr7	-	133991423	133991526	133989556	133989606	133986781	133986862	ENSG00000205060:133986781-133986862:source	ENSG00000205060:133991424-133991526:target
NUP205	ENSG00000155561	chr7	+	135282488	135282955	135283544	135283644	135285617	135285717	ENSG00000155561:135282488-135282955:source	ENSG00000155561:135285618-135285717:target
CREB3L2	ENSG00000182158	chr7	-	137612895	137613112	137607335	137607513	137600583	137600758	ENSG00000182158:137600583-137600758:source	ENSG00000182158:137612896-137613112:target
TTC26	ENSG00000105948	chr7	+	138865838	138865944	138872151	138872285	138874066	138876066	ENSG00000105948:138865838-138865944:source	ENSG00000105948:138874067-138876732:target
KDM7A	ENSG00000006459	chr7	-	139813290	139813382	139810894	139810984	139801751	139801960	ENSG00000006459:139801751-139801960:source	ENSG00000006459:139813291-139813382:target
ADCK2	ENSG00000133597	chr7	+	140374284	140374557	140378954	140379083	140380841	140380937	ENSG00000133597:140374284-140374557:source	ENSG00000133597:140380842-140380937:target
BRAF	ENSG00000157764	chr7	-	140449086	140449218	140447165	140447247	140439612	140439746	ENSG00000157764:140439612-140439746:source	ENSG00000157764:140449087-140449218:target
AGK	ENSG00000006530	chr7	+	141336760	141336817	141341047	141341198	141341610	141341708	ENSG00000006530:141336760-141336817:source	ENSG00000006530:141341611-141341708:target
CUL1	ENSG00000055130	chr7	+	148454075	148454242	148456395	148456446	148456639	148456730	ENSG00000055130:148454075-148454242:source	ENSG00000055130:148456640-148456730:target
EZH2	ENSG00000106462	chr7	-	148508716	148509160	148507842	148507981	148507292	148507506	ENSG00000106462:148507292-148507506:source	ENSG00000106462:148508717-148509160:target
ESYT2	ENSG00000117868	chr7	-	158528193	158528299	158527356	158527474	158527113	158527162	ENSG00000117868:158527113-158527162:source	ENSG00000117868:158528194-158528299:target
WDR60	ENSG00000126870	chr7	+	158719093	158719154	158719682	158719734	158723145	158723206	ENSG00000126870:158719093-158719154:source	ENSG00000126870:158723146-158723206:target
NSFL1C	ENSG00000088833	chr20	-	1435611	1435781	1434857	1434950	1433676	1433785	ENSG00000088833:1433676-1433785:source	ENSG00000088833:1435612-1435781:target
SNRPB	ENSG00000125835	chr20	-	2448252	2448404	2447837	2447961	2446354	2446465	ENSG00000125835:2446354-2446465:source	ENSG00000125835:2448253-2448404:target
ZNF343	ENSG00000088876	chr20	-	2481301	2481388	2476060	2476170	2474424	2474690	ENSG00000088876:2474424-2474690:source	ENSG00000088876:2481302-2481388:target
PTPRA	ENSG00000132670	chr20	+	2968984	2969120	2979976	2980071	2985701	2985792	ENSG00000132670:2968984-2969120:source	ENSG00000132670:2985702-2985792:target
PTPRA	ENSG00000132670	chr20	+	2987990	2988066	2988691	2988991	2996494	2996531	ENSG00000132670:2987990-2988066:source	ENSG00000132670:2996495-2996531:target
UBOX5	ENSG00000185019	chr20	-	3140411	3140842	3137329	3137436	3103958	3104052	ENSG00000185019:3103958-3104052:source	ENSG00000185019:3140412-3140842:target
ITPA	ENSG00000125877	chr20	+	3195858	3195958	3198043	3198082	3199162	3199737	ENSG00000125877:3195858-3195958:source	ENSG00000125877:3199163-3199737:target
TRMT6	ENSG00000089195	chr20	-	5927051	5927179	5925450	5925560	5924808	5924899	ENSG00000089195:5924808-5924899:source	ENSG00000089195:5927052-5927179:target
KIF16B	ENSG00000089177	chr20	-	16336974	16337097	16316570	16316660	16292980	16293063	ENSG00000089177:16292980-16293063:source	ENSG00000089177:16336975-16337097:target
SNRPB2	ENSG00000125870	chr20	+	16717906	16718046	16719496	16719547	16720969	16721058	ENSG00000125870:16717906-16718046:source	ENSG00000125870:16720970-16721058:target
RRBP1	ENSG00000125844	chr20	-	17599240	17599324	17597376	17597484	17596571	17596654	ENSG00000125844:17596571-17596654:source	ENSG00000125844:17599241-17599324:target
RBBP9	ENSG00000089050	chr20	-	18474601	18474707	18471038	18471124	18468634	18470634	ENSG00000089050:18467184-18470634:source	ENSG00000089050:18474602-18474707:target
SEC23B	ENSG00000101310	chr20	+	18491621	18491700	18492868	18492926	18496293	18496628	ENSG00000101310:18491621-18491700:source	ENSG00000101310:18496294-18496628:target
SEC23B	ENSG00000101310	chr20	+	18529253	18529414	18531732	18531819	18534878	18535034	ENSG00000101310:18529253-18529414:source	ENSG00000101310:18534879-18535034:target
XRN2	ENSG00000088930	chr20	+	21346211	21346342	21347274	21347428	21349100	21349228	ENSG00000088930:21346211-21346342:source	ENSG00000088930:21349101-21349228:target
PYGB	ENSG00000100994	chr20	+	25255228	25255359	25256835	25256930	25257281	25257393	ENSG00000100994:25255228-25255359:source	ENSG00000100994:25257282-25257393:target
ZNF337	ENSG00000130684	chr20	-	25666631	25666885	25666202	25666298	25655673	25657673	ENSG00000130684:25654851-25657673:source	ENSG00000130684:25666632-25666885:target
TPX2	ENSG00000088325	chr20	+	30366616	30366787	30368741	30368849	30370051	30370193	ENSG00000088325:30366616-30366787:source	ENSG00000088325:30370052-30370193:target
TM9SF4	ENSG00000101337	chr20	+	30742855	30742989	30745596	30745772	30746253	30746317	ENSG00000101337:30742855-30742989:source	ENSG00000101337:30746254-30746317:target
NOL4L	ENSG00000197183	chr20	-	31043920	31044198	31041817	31041887	31041379	31041564	ENSG00000197183:31041379-31041564:source	ENSG00000197183:31043921-31044198:target
PIGU	ENSG00000101464	chr20	-	33162907	33163050	33150239	33150369	33148346	33148783	ENSG00000101464:33148346-33148783:source	ENSG00000101464:33162908-33163050:target
PIGU	ENSG00000101464	chr20	-	33244983	33245048	33233078	33233138	33231371	33232030	ENSG00000101464:33231371-33232030:source	ENSG00000101464:33244984-33245048:target
GGT7	ENSG00000131067	chr20	-	33447245	33447485	33446373	33446532	33444426	33444696	ENSG00000131067:33444426-33444696:source	ENSG00000131067:33447246-33447485:target
EDEM2	ENSG00000088298	chr20	-	33714053	33714178	33711692	33711837	33705828	33706522	ENSG00000088298:33705828-33706522:source	ENSG00000088298:33714054-33714178:target
CEP250	ENSG00000126001	chr20	+	34067801	34067970	34078462	34078630	34079037	34079172	ENSG00000126001:34067801-34067970:source	ENSG00000126001:34079038-34079172:target
PHF20	ENSG00000025293	chr20	+	34430495	34430666	34433306	34433430	34435271	34435356	ENSG00000025293:34430495-34430666:source	ENSG00000025293:34435272-34435356:target
NDRG3	ENSG00000101079	chr20	-	35284762	35284814	35283203	35283242	35280169	35282104	ENSG00000101079:35280169-35282104:source	ENSG00000101079:35284763-35284814:target
NDRG3	ENSG00000101079	chr20	-	35293448	35293500	35288739	35288787	35284900	35284935	ENSG00000101079:35284900-35284935:source	ENSG00000101079:35293449-35293500:target
NDRG3	ENSG00000101079	chr20	-	35310920	35310981	35309218	35309305	35299744	35299800	ENSG00000101079:35299744-35299800:source	ENSG00000101079:35310921-35310981:target
CTNNBL1	ENSG00000132792	chr20	+	36431269	36431450	36460649	36460747	36468503	36468601	ENSG00000132792:36431269-36431450:source	ENSG00000132792:36468504-36468601:target
TTI1	ENSG00000101407	chr20	-	36627589	36627730	36625150	36625355	36624777	36624864	ENSG00000101407:36624777-36624864:source	ENSG00000101407:36627590-36627730:target
RPRD1B	ENSG00000101413	chr20	+	36661948	36662500	36668836	36668966	36676749	36677020	ENSG00000101413:36661948-36662500:source	ENSG00000101413:36676750-36677020:target
MYBL2	ENSG00000101057	chr20	+	42328397	42328684	42331129	42331543	42333858	42333998	ENSG00000101057:42328397-42328684:source	ENSG00000101057:42333859-42333998:target
STK4	ENSG00000101109	chr20	+	43610470	43610584	43615772	43615937	43623730	43623898	ENSG00000101109:43610470-43610584:source	ENSG00000101109:43623731-43623898:target
SYS1-DBNDD2	ENSG00000254806	chr20	+	43994259	43994326	44028329	44028391	44037099	44037246	ENSG00000254806:43994259-43994326:source	ENSG00000254806:44037100-44037246:target
DNTTIP1	ENSG00000101457	chr20	+	44422560	44422656	44423983	44424082	44429712	44429781	ENSG00000101457:44422560-44422656:source	ENSG00000101457:44429713-44429781:target
PCIF1	ENSG00000100982	chr20	+	44567854	44567978	44569113	44569251	44569447	44569578	ENSG00000100982:44567854-44567978:source	ENSG00000100982:44569448-44569578:target
ZMYND8	ENSG00000101040	chr20	-	45865069	45865260	45858471	45858552	45855946	45856024	ENSG00000101040:45855946-45856024:source	ENSG00000101040:45865070-45865260:target
ZMYND8	ENSG00000101040	chr20	-	45927472	45927691	45923409	45923523	45920540	45920632	ENSG00000101040:45920540-45920632:source	ENSG00000101040:45927473-45927691:target
ARFGEF2	ENSG00000124198	chr20	+	47645067	47645205	47648585	47648703	47649559	47651559	ENSG00000124198:47645067-47645205:source	ENSG00000124198:47649560-47653230:target
ZNFX1	ENSG00000124201	chr20	-	47881252	47881401	47879870	47880020	47877000	47877114	ENSG00000124201:47877000-47877114:source	ENSG00000124201:47881253-47881401:target
PTPN1	ENSG00000196396	chr20	+	49126891	49127127	49177899	49177990	49181505	49181606	ENSG00000196396:49126891-49127127:source	ENSG00000196396:49181506-49181606:target
RAB22A	ENSG00000124209	chr20	+	56928488	56928594	56929211	56929321	56934661	56936661	ENSG00000124209:56928488-56928594:source	ENSG00000124209:56934662-56942563:target
VAPB	ENSG00000124164	chr20	+	56964178	56964573	56965183	56965396	56993266	56993419	ENSG00000124164:56964178-56964573:source	ENSG00000124164:56993267-56993419:target
SYCP2	ENSG00000196074	chr20	-	58457149	58457220	58456999	58457057	58456492	58456547	ENSG00000196074:58456492-58456547:source	ENSG00000196074:58457150-58457220:target
SS18L1	ENSG00000184402	chr20	+	60747738	60747857	60749572	60749700	60754237	60754412	ENSG00000184402:60747738-60747857:source	ENSG00000184402:60754238-60754412:target
OSBPL2	ENSG00000130703	chr20	+	60838672	60838747	60839684	60839774	60847180	60847315	ENSG00000130703:60838672-60838747:source	ENSG00000130703:60847181-60847315:target
CABLES2	ENSG00000149679	chr20	-	60969992	60970070	60969212	60969321	60968496	60968661	ENSG00000149679:60968496-60968661:source	ENSG00000149679:60969993-60970070:target
DIDO1	ENSG00000101191	chr20	-	61541050	61541372	61540402	61540510	61538499	61538711	ENSG00000101191:61538499-61538711:source	ENSG00000101191:61541051-61541372:target
ARFGAP1	ENSG00000101199	chr20	+	61910251	61910347	61910571	61910658	61912642	61912699	ENSG00000101199:61910251-61910347:source	ENSG00000101199:61912643-61912699:target
RTEL1	ENSG00000258366	chr20	+	62290586	62290857	62292028	62292149	62292650	62292849	ENSG00000258366:62290586-62290857:source	ENSG00000258366:62292651-62292849:target
IPO4	ENSG00000196497	chr14	-	24650916	24651049	24650718	24650823	24649889	24649964	ENSG00000196497:24649889-24649964:source	ENSG00000196497:24650917-24651049:target
SCFD1	ENSG00000092108	chr14	+	31112522	31112611	31113085	31113224	31118733	31118789	ENSG00000092108:31112522-31112611:source	ENSG00000092108:31118734-31118789:target
BAZ1A	ENSG00000198604	chr14	-	35295218	35295362	35285920	35286062	35280141	35280242	ENSG00000198604:35280141-35280242:source	ENSG00000198604:35295219-35295362:target
PSMA6	ENSG00000100902	chr14	+	35777981	35778201	35779422	35779505	35779945	35780033	ENSG00000100902:35777981-35778201:source	ENSG00000100902:35779946-35780033:target
SEC23A	ENSG00000100934	chr14	-	39508234	39508300	39505264	39505355	39501123	39502532	ENSG00000100934:39501123-39502532:source	ENSG00000100934:39508235-39508300:target
GEMIN2	ENSG00000092208	chr14	+	39587744	39587803	39591110	39591228	39591633	39591905	ENSG00000092208:39587744-39587803:source	ENSG00000092208:39591634-39591905:target
FANCM	ENSG00000187790	chr14	+	45628299	45628483	45633561	45633768	45636152	45636626	ENSG00000187790:45628299-45628483:source	ENSG00000187790:45636153-45636626:target
MIS18BP1	ENSG00000129534	chr14	-	45687484	45687657	45686221	45686382	45679314	45679731	ENSG00000129534:45679314-45679731:source	ENSG00000129534:45687485-45687657:target
MAP4K5	ENSG00000012983	chr14	-	50892624	50892695	50889838	50889894	50885219	50886824	ENSG00000012983:50885219-50886824:source	ENSG00000012983:50892625-50892695:target
SAV1	ENSG00000151748	chr14	-	51134591	51135049	51134099	51134218	51132319	51132337	ENSG00000151748:51132319-51132337:source	ENSG00000151748:51134592-51135049:target
NIN	ENSG00000100503	chr14	-	51202233	51202335	51197640	51197701	51196241	51196441	ENSG00000100503:51196241-51196441:source	ENSG00000100503:51202234-51202335:target
PYGL	ENSG00000100504	chr14	-	51410878	51411454	51404453	51404555	51401825	51401903	ENSG00000100504:51401825-51401903:source	ENSG00000100504:51410879-51411454:target
STYX	ENSG00000198252	chr14	+	53217401	53217498	53223268	53223329	53224036	53224073	ENSG00000198252:53217401-53217498:source	ENSG00000198252:53224037-53224073:target
GCH1	ENSG00000131979	chr14	-	55313816	55313848	55312485	55312570	55310719	55310861	ENSG00000131979:55310719-55310861:source	ENSG00000131979:55313817-55313848:target
WDHD1	ENSG00000198554	chr14	-	55457930	55458118	55455745	55455930	55453864	55454105	ENSG00000198554:55453864-55454105:source	ENSG00000198554:55457931-55458118:target
ATG14	ENSG00000126775	chr14	-	55857628	55858020	55852576	55852814	55848680	55848909	ENSG00000126775:55848680-55848909:source	ENSG00000126775:55857629-55858020:target
KTN1	ENSG00000126777	chr14	+	56094630	56094746	56096674	56096815	56099952	56100059	ENSG00000126777:56094630-56094746:source	ENSG00000126777:56099953-56100059:target
NAA30	ENSG00000139977	chr14	+	57863470	57863593	57866545	57866601	57876096	57878096	ENSG00000139977:57863470-57863593:source	ENSG00000139977:57876097-57882635:target
DAAM1	ENSG00000100592	chr14	+	59798531	59798638	59805102	59805132	59806791	59806898	ENSG00000100592:59798531-59798638:source	ENSG00000100592:59806792-59806898:target
SYNE2	ENSG00000054654	chr14	+	64644076	64644201	64653141	64653297	64655267	64655426	ENSG00000054654:64644076-64644201:source	ENSG00000054654:64655268-64655426:target
CHURC1-FNTB	ENSG00000125954	chr14	+	65470967	65471031	65479034	65479107	65482342	65482434	ENSG00000125954:65470967-65471031:source	ENSG00000125954:65482343-65482434:target
GPHN	ENSG00000171723	chr14	+	67609718	67610166	67626131	67626205	67631878	67631947	ENSG00000171723:67609718-67610166:source	ENSG00000171723:67631879-67631947:target
RBM25	ENSG00000119707	chr14	+	73578860	73578958	73580993	73581041	73586420	73588122	ENSG00000119707:73578860-73578958:source	ENSG00000119707:73586421-73588122:target
ELMSAN1	ENSG00000156030	chr14	-	74203700	74204000	74196772	74196882	74196343	74196688	ENSG00000156030:74196343-74196688:source	ENSG00000156030:74203701-74204000:target
ALDH6A1	ENSG00000119711	chr14	-	74541657	74541720	74539239	74539314	74538906	74539067	ENSG00000119711:74538906-74539067:source	ENSG00000119711:74541658-74541720:target
NPC2	ENSG00000119655	chr14	-	74959895	74960215	74953031	74953139	74951114	74951290	ENSG00000119655:74951114-74951290:source	ENSG00000119655:74959896-74960215:target
AREL1	ENSG00000119682	chr14	-	75139533	75139655	75138671	75138723	75138111	75138186	ENSG00000119682:75138111-75138186:source	ENSG00000119682:75139534-75139655:target
YLPM1	ENSG00000119596	chr14	+	75230069	75231065	75238394	75238449	75245149	75245386	ENSG00000119596:75230069-75231065:source	ENSG00000119596:75245150-75245386:target
VIPAS39	ENSG00000151445	chr14	-	77895348	77895438	77894712	77894817	77893018	77893979	ENSG00000151445:77893018-77893979:source	ENSG00000151445:77895349-77895438:target
VIPAS39	ENSG00000151445	chr14	-	77917529	77917676	77916056	77916095	77915636	77915700	ENSG00000151445:77915636-77915700:source	ENSG00000151445:77917530-77917676:target
ZC3H14	ENSG00000100722	chr14	+	89076023	89076147	89077177	89077284	89078088	89079853	ENSG00000100722:89076023-89076147:source	ENSG00000100722:89078089-89079853:target
TDP1	ENSG00000042088	chr14	+	90451476	90451554	90453329	90453386	90455248	90455434	ENSG00000042088:90451476-90451554:source	ENSG00000042088:90455249-90455434:target
TRIP11	ENSG00000100815	chr14	-	92454627	92454727	92443469	92443592	92442452	92442533	ENSG00000100815:92442452-92442533:source	ENSG00000100815:92454628-92454727:target
CLMN	ENSG00000165959	chr14	-	95690096	95690192	95688739	95688936	95688028	95688111	ENSG00000165959:95688028-95688111:source	ENSG00000165959:95690097-95690192:target
CCDC85C	ENSG00000205476	chr14	-	99988469	99988577	99983424	99983520	99982525	99982623	ENSG00000205476:99982525-99982623:source	ENSG00000205476:99988470-99988577:target
DYNC1H1	ENSG00000197102	chr14	+	102492911	102493044	102493510	102493625	102493719	102493881	ENSG00000197102:102492911-102493044:source	ENSG00000197102:102493720-102493881:target
MICAL3	ENSG00000243156	chr22	-	18383607	18383763	18382213	18382314	18379490	18379747	ENSG00000243156:18379490-18379747:source	ENSG00000243156:18383608-18383763:target
MICAL3	ENSG00000243156	chr22	-	18385396	18385513	18384643	18384745	18383608	18383763	ENSG00000243156:18383608-18383763:source	ENSG00000243156:18385397-18385513:target
DGCR2	ENSG00000070413	chr22	-	19109640	19109967	19076880	19077003	19055611	19055738	ENSG00000070413:19055611-19055738:source	ENSG00000070413:19109641-19109967:target
HIRA	ENSG00000100084	chr22	-	19343752	19343811	19343282	19343388	19341519	19341641	ENSG00000100084:19341519-19341641:source	ENSG00000100084:19343753-19343811:target
TXNRD2	ENSG00000184470	chr22	-	19870847	19872027	19868144	19868240	19867702	19867794	ENSG00000184470:19867702-19867794:source	ENSG00000184470:19870848-19872027:target
TXNRD2	ENSG00000184470	chr22	-	19918552	19918621	19907065	19907122	19906383	19906527	ENSG00000184470:19906383-19906527:source	ENSG00000184470:19918553-19918621:target
ARVCF	ENSG00000099889	chr22	-	19960259	19960350	19959880	19959934	19959409	19959494	ENSG00000099889:19959409-19959494:source	ENSG00000099889:19960260-19960350:target
PI4KA	ENSG00000241973	chr22	-	21083600	21083794	21083280	21083398	21081857	21082152	ENSG00000241973:21081857-21082152:source	ENSG00000241973:21083601-21083794:target
SNAP29	ENSG00000099940	chr22	+	21235337	21235422	21237758	21237857	21241966	21243966	ENSG00000099940:21235337-21235422:source	ENSG00000099940:21241967-21245506:target
UBE2L3	ENSG00000185651	chr22	+	21965146	21965332	21968845	21968954	21975803	21977803	ENSG00000185651:21965146-21965332:source	ENSG00000185651:21975804-21978323:target
YPEL1	ENSG00000100027	chr22	-	22057658	22057767	22056088	22056304	22053507	22055507	ENSG00000100027:22051833-22055507:source	ENSG00000100027:22057659-22057767:target
PPM1F	ENSG00000100034	chr22	-	22287762	22287951	22287291	22287406	22285638	22285663	ENSG00000100034:22285638-22285663:source	ENSG00000100034:22287763-22287951:target
ADRBK2	ENSG00000100077	chr22	+	26063706	26063767	26068262	26068314	26070403	26070495	ENSG00000100077:26063706-26063767:source	ENSG00000100077:26070404-26070495:target
ADRBK2	ENSG00000100077	chr22	+	26099477	26099543	26100075	26100176	26105864	26105931	ENSG00000100077:26099477-26099543:source	ENSG00000100077:26105865-26105931:target
CCDC117	ENSG00000159873	chr22	+	29168662	29169022	29169712	29169766	29176935	29177160	ENSG00000159873:29168662-29169022:source	ENSG00000159873:29176936-29177160:target
AP1B1	ENSG00000100280	chr22	-	29726366	29726521	29725700	29725709	29723669	29724884	ENSG00000100280:29723669-29724884:source	ENSG00000100280:29726367-29726521:target
AP1B1	ENSG00000100280	chr22	-	29736644	29736846	29735742	29735763	29734979	29735122	ENSG00000100280:29734979-29735122:source	ENSG00000100280:29736645-29736846:target
NIPSNAP1	ENSG00000184117	chr22	-	29954858	29954942	29952226	29952510	29950797	29951988	ENSG00000184117:29950797-29951988:source	ENSG00000184117:29954859-29954942:target
NIPSNAP1	ENSG00000184117	chr22	-	29965181	29965276	29960226	29960360	29957781	29957851	ENSG00000184117:29957781-29957851:source	ENSG00000184117:29965182-29965276:target
DRG1	ENSG00000185721	chr22	+	31795509	31795711	31796605	31796729	31799014	31799190	ENSG00000185721:31795509-31795711:source	ENSG00000185721:31799015-31799190:target
DRG1	ENSG00000185721	chr22	+	31796606	31796729	31799014	31799190	31806997	31807067	ENSG00000185721:31796606-31796729:source	ENSG00000185721:31806998-31807067:target
EIF4ENIF1	ENSG00000184708	chr22	-	31843411	31843554	31842923	31842994	31840424	31840676	ENSG00000184708:31840424-31840676:source	ENSG00000184708:31843412-31843554:target
SFI1	ENSG00000198089	chr22	+	32011034	32011265	32011913	32012013	32012730	32012863	ENSG00000198089:32011034-32011265:source	ENSG00000198089:32012731-32012863:target
PISD	ENSG00000241878	chr22	-	32058129	32058418	32046684	32046764	32044087	32044262	ENSG00000241878:32044087-32044262:source	ENSG00000241878:32058130-32058418:target
PRR14L	ENSG00000183530	chr22	-	32097641	32097748	32084141	32084213	32079789	32081789	ENSG00000183530:32079615-32081789:source	ENSG00000183530:32097642-32097748:target
PRR14L	ENSG00000183530	chr22	-	32099535	32099707	32097641	32097748	32084142	32084213	ENSG00000183530:32084142-32084213:source	ENSG00000183530:32099536-32099707:target
DEPDC5	ENSG00000100150	chr22	+	32253431	32253539	32257353	32257419	32266575	32266730	ENSG00000100150:32253431-32253539:source	ENSG00000100150:32266576-32266730:target
DEPDC5	ENSG00000100150	chr22	+	32293468	32293639	32297727	32297788	32301969	32302052	ENSG00000100150:32293468-32293639:source	ENSG00000100150:32301970-32302052:target
FBXO7	ENSG00000100225	chr22	+	32889092	32889268	32891479	32891517	32894130	32894818	ENSG00000100225:32889092-32889268:source	ENSG00000100225:32894131-32894818:target
TOM1	ENSG00000100284	chr22	+	35726340	35726473	35727288	35727488	35728973	35729007	ENSG00000100284:35726340-35726473:source	ENSG00000100284:35728974-35729007:target
APOL6	ENSG00000221963	chr22	+	36044442	36044670	36049650	36049767	36052425	36052522	ENSG00000221963:36044442-36044670:source	ENSG00000221963:36052426-36052522:target
MYH9	ENSG00000100345	chr22	-	36701975	36702097	36701304	36701799	36701079	36701148	ENSG00000100345:36701079-36701148:source	ENSG00000100345:36701976-36702097:target
TAB1	ENSG00000100324	chr22	+	39817740	39817976	39820470	39820592	39822707	39822930	ENSG00000100324:39817740-39817976:source	ENSG00000100324:39822708-39822930:target
TNRC6B	ENSG00000100354	chr22	+	40675999	40676147	40677122	40677293	40681648	40681774	ENSG00000100354:40675999-40676147:source	ENSG00000100354:40681649-40681774:target
MKL1	ENSG00000196588	chr22	-	40820209	40820385	40819539	40819689	40816851	40817104	ENSG00000196588:40816851-40817104:source	ENSG00000196588:40820210-40820385:target
XPNPEP3	ENSG00000196236	chr22	+	41310243	41310328	41318336	41318517	41320365	41320486	ENSG00000196236:41310243-41310328:source	ENSG00000196236:41320366-41320486:target
EP300	ENSG00000100393	chr22	+	41554416	41554504	41555703	41555821	41556645	41556726	ENSG00000100393:41554416-41554504:source	ENSG00000100393:41556646-41556726:target
RANGAP1	ENSG00000100401	chr22	-	41653951	41654110	41652714	41652828	41652195	41652294	ENSG00000100401:41652195-41652294:source	ENSG00000100401:41653952-41654110:target
CYB5R3	ENSG00000100243	chr22	-	43023309	43023395	43021388	43021487	43019795	43019894	ENSG00000100243:43019795-43019894:source	ENSG00000100243:43023310-43023395:target
TTLL1	ENSG00000100271	chr22	-	43455389	43455533	43447806	43447893	43442416	43442579	ENSG00000100271:43442416-43442579:source	ENSG00000100271:43455390-43455533:target
TTLL12	ENSG00000100304	chr22	-	43575624	43575758	43575133	43575241	43572326	43572402	ENSG00000100304:43572326-43572402:source	ENSG00000100304:43575625-43575758:target
ATXN10	ENSG00000130638	chr22	+	46067678	46068059	46085591	46085783	46088875	46088958	ENSG00000130638:46067678-46068059:source	ENSG00000130638:46088876-46088958:target
GTSE1	ENSG00000075218	chr22	+	46704216	46704840	46708037	46708202	46709786	46709951	ENSG00000075218:46704216-46704840:source	ENSG00000075218:46709787-46709951:target
CERK	ENSG00000100422	chr22	-	47108064	47108190	47106982	47107046	47103740	47103885	ENSG00000100422:47103740-47103885:source	ENSG00000100422:47108065-47108190:target
TBC1D22A	ENSG00000054611	chr22	+	47193341	47193517	47274548	47274619	47287161	47287290	ENSG00000054611:47193341-47193517:source	ENSG00000054611:47287162-47287290:target
TUBGCP6	ENSG00000128159	chr22	-	50666335	50666457	50665427	50665506	50665162	50665271	ENSG00000128159:50665162-50665271:source	ENSG00000128159:50666336-50666457:target
PLXNB2	ENSG00000196576	chr22	-	50724228	50724330	50723273	50723342	50723002	50723094	ENSG00000196576:50723002-50723094:source	ENSG00000196576:50724229-50724330:target
RPS4Y1	ENSG00000129824	chrY	+	2712118	2712298	2713197	2713337	2713686	2713784	ENSG00000129824:2712118-2712298:source	ENSG00000129824:2713687-2713784:target
KDM5D	ENSG00000012817	chrY	-	21905047	21905279	21903620	21903743	21903204	21903374	ENSG00000012817:21903204-21903374:source	ENSG00000012817:21905048-21905279:target
MCPH1	ENSG00000147316	chr8	+	6293569	6293683	6296473	6296617	6299587	6299677	ENSG00000147316:6293569-6293683:source	ENSG00000147316:6299588-6299677:target
ERI1	ENSG00000104626	chr8	+	8860191	8860681	8861583	8861806	8865479	8865658	ENSG00000104626:8860191-8860681:source	ENSG00000104626:8865480-8865658:target
TNKS	ENSG00000173273	chr8	+	9577884	9578055	9579907	9580010	9584150	9584230	ENSG00000173273:9577884-9578055:source	ENSG00000173273:9584151-9584230:target
PCM1	ENSG00000078674	chr8	+	17804695	17804872	17808123	17808233	17810478	17810695	ENSG00000078674:17804695-17804872:source	ENSG00000078674:17810479-17810695:target
ATP6V1B2	ENSG00000147416	chr8	+	20054878	20055053	20061469	20061594	20061994	20062050	ENSG00000147416:20054878-20055053:source	ENSG00000147416:20061995-20062050:target
EPHX2	ENSG00000120915	chr8	+	27382879	27382990	27394300	27394372	27396175	27396772	ENSG00000120915:27382879-27382990:source	ENSG00000120915:27396176-27396772:target
ELP3	ENSG00000134014	chr8	+	28019514	28019595	28040710	28040781	28047165	28048673	ENSG00000134014:28019514-28019595:source	ENSG00000134014:28047166-28048673:target
EXTL3	ENSG00000012232	chr8	+	28588740	28588867	28590430	28590551	28595035	28595180	ENSG00000012232:28588740-28588867:source	ENSG00000012232:28595036-28595180:target
KIF13B	ENSG00000197892	chr8	-	28974347	28974524	28972059	28972184	28970980	28971072	ENSG00000197892:28970980-28971072:source	ENSG00000197892:28974348-28974524:target
KIF13B	ENSG00000197892	chr8	-	29120496	29120641	29107501	29107601	29102863	29102956	ENSG00000197892:29102863-29102956:source	ENSG00000197892:29120497-29120641:target
WRN	ENSG00000165392	chr8	+	30946406	30946481	30947980	30948048	30948349	30948458	ENSG00000165392:30946406-30946481:source	ENSG00000165392:30948350-30948458:target
MAK16	ENSG00000198042	chr8	+	33354143	33354259	33354749	33354815	33355949	33357949	ENSG00000198042:33354143-33354259:source	ENSG00000198042:33355950-33358778:target
RNF122	ENSG00000133874	chr8	-	33416132	33416289	33413582	33413690	33408862	33408907	ENSG00000133874:33408862-33408907:source	ENSG00000133874:33416133-33416289:target
ASH2L	ENSG00000129691	chr8	+	37963311	37963657	37963895	37963962	37964538	37964684	ENSG00000129691:37963311-37963657:source	ENSG00000129691:37964539-37964684:target
ASH2L	ENSG00000129691	chr8	+	37963896	37963962	37964538	37964684	37967896	37967985	ENSG00000129691:37963896-37963962:source	ENSG00000129691:37967897-37967985:target
ADAM9	ENSG00000168615	chr8	+	38884196	38884329	38899464	38899636	38911999	38912092	ENSG00000168615:38884196-38884329:source	ENSG00000168615:38912000-38912092:target
AP3M2	ENSG00000070718	chr8	+	42025283	42025328	42025714	42025767	42026478	42026803	ENSG00000070718:42025283-42025328:source	ENSG00000070718:42026479-42026803:target
SLC20A2	ENSG00000168575	chr8	-	42286275	42286360	42277112	42277188	42273993	42275485	ENSG00000168575:42273993-42275485:source	ENSG00000168575:42286276-42286360:target
PRKDC	ENSG00000253729	chr8	-	48690246	48690435	48689404	48689544	48685669	48686938	ENSG00000253729:48685669-48686938:source	ENSG00000253729:48690247-48690435:target
PRKDC	ENSG00000253729	chr8	-	48801078	48801211	48800107	48800266	48798505	48798708	ENSG00000253729:48798505-48798708:source	ENSG00000253729:48801079-48801211:target
MRPL15	ENSG00000137547	chr8	+	55049171	55049225	55049827	55049993	55055222	55055387	ENSG00000137547:55049171-55049225:source	ENSG00000137547:55055223-55055387:target
ARMC1	ENSG00000104442	chr8	-	66539450	66539668	66534497	66534589	66525479	66525668	ENSG00000104442:66525479-66525668:source	ENSG00000104442:66539451-66539668:target
ARFGEF1	ENSG00000066777	chr8	-	68200189	68200300	68189516	68189692	68188211	68188344	ENSG00000066777:68188211-68188344:source	ENSG00000066777:68200190-68200300:target
TRAM1	ENSG00000067167	chr8	-	71499340	71499411	71499129	71499234	71495885	71496028	ENSG00000067167:71495885-71496028:source	ENSG00000067167:71499341-71499411:target
LRRCC1	ENSG00000133739	chr8	+	86038924	86039072	86041409	86041614	86042153	86042293	ENSG00000133739:86038924-86039072:source	ENSG00000133739:86042154-86042293:target
OSGIN2	ENSG00000164823	chr8	+	90921795	90921949	90926304	90926441	90926782	90926974	ENSG00000164823:90921795-90921949:source	ENSG00000164823:90926783-90926974:target
C8orf88	ENSG00000253250	chr8	-	91990806	91990880	91983293	91983369	91972970	91973076	ENSG00000253250:91972970-91973076:source	ENSG00000253250:91990807-91990880:target
DPY19L4	ENSG00000156162	chr8	+	95773928	95774062	95777410	95777542	95777938	95778037	ENSG00000156162:95773928-95774062:source	ENSG00000156162:95777939-95778037:target
DPY19L4	ENSG00000156162	chr8	+	95777411	95777542	95777938	95778037	95778839	95778913	ENSG00000156162:95777411-95777542:source	ENSG00000156162:95778840-95778913:target
DPY19L4	ENSG00000156162	chr8	+	95792587	95792643	95793311	95793394	95795897	95796030	ENSG00000156162:95792587-95792643:source	ENSG00000156162:95795898-95796030:target
INTS8	ENSG00000164941	chr8	+	95861690	95861760	95862143	95862319	95863780	95863914	ENSG00000164941:95861690-95861760:source	ENSG00000164941:95863781-95863914:target
PTDSS1	ENSG00000156471	chr8	+	97307326	97307484	97311921	97312073	97316267	97316409	ENSG00000156471:97307326-97307484:source	ENSG00000156471:97316268-97316409:target
ERICH5	ENSG00000177459	chr8	+	99076539	99076955	99101303	99102257	99105448	99105838	ENSG00000177459:99076539-99076955:source	ENSG00000177459:99105449-99105838:target
UBR5	ENSG00000104517	chr8	-	103274142	103274298	103273803	103273902	103273374	103273487	ENSG00000104517:103273374-103273487:source	ENSG00000104517:103274143-103274298:target
EMC2	ENSG00000104412	chr8	+	109455830	109455927	109458390	109458530	109462051	109462165	ENSG00000104412:109455830-109455927:source	ENSG00000104412:109462052-109462165:target
NUDCD1	ENSG00000120526	chr8	-	110334537	110334692	110326025	110326117	110308613	110308798	ENSG00000120526:110308613-110308798:source	ENSG00000120526:110334538-110334692:target
EXT1	ENSG00000182197	chr8	-	118847682	118847790	118843837	118843892	118842469	118842588	ENSG00000182197:118842469-118842588:source	ENSG00000182197:118847683-118847790:target
TAF2	ENSG00000064313	chr8	-	120809901	120810086	120809229	120809343	120807772	120807871	ENSG00000064313:120807772-120807871:source	ENSG00000064313:120809902-120810086:target
MRPL13	ENSG00000172172	chr8	-	121455424	121455548	121444269	121444363	121437546	121437606	ENSG00000172172:121437546-121437606:source	ENSG00000172172:121455425-121455548:target
SNTB1	ENSG00000172164	chr8	-	121705931	121706148	121667118	121667273	121644684	121644891	ENSG00000172164:121644684-121644891:source	ENSG00000172164:121705932-121706148:target
WDYHV1	ENSG00000156795	chr8	+	124449450	124449574	124450373	124450478	124453545	124454480	ENSG00000156795:124449450-124449574:source	ENSG00000156795:124453546-124454480:target
PHF20L1	ENSG00000129292	chr8	+	133806656	133806827	133806978	133807063	133811017	133811106	ENSG00000129292:133806656-133806827:source	ENSG00000129292:133811018-133811106:target
PTK2	ENSG00000169398	chr8	-	141774332	141774622	141772466	141772487	141771264	141771361	ENSG00000169398:141771264-141771361:source	ENSG00000169398:141774333-141774622:target
PLEC	ENSG00000178209	chr8	-	145012798	145012860	145012568	145012583	145012319	145012408	ENSG00000178209:145012319-145012408:source	ENSG00000178209:145012799-145012860:target
DGAT1	ENSG00000185000	chr8	-	145544983	145545071	145542690	145542731	145542498	145542583	ENSG00000185000:145542498-145542583:source	ENSG00000185000:145544984-145545071:target
TONSL	ENSG00000160949	chr8	-	145655786	145655920	145654941	145655041	145654165	145654719	ENSG00000160949:145654165-145654719:source	ENSG00000160949:145655787-145655920:target
TONSL	ENSG00000160949	chr8	-	145657667	145658321	145656460	145656534	145655787	145655920	ENSG00000160949:145655787-145655920:source	ENSG00000160949:145657668-145658321:target
MIER2	ENSG00000105556	chr19	-	308576	308665	308150	308290	307117	307536	ENSG00000105556:307117-307536:source	ENSG00000105556:308577-308665:target
CDC34	ENSG00000099804	chr19	+	531714	532108	535836	535923	536242	536715	ENSG00000099804:531714-532108:source	ENSG00000099804:536243-536715:target
ABCA7	ENSG00000064687	chr19	+	1051448	1051585	1051940	1052125	1052212	1052285	ENSG00000064687:1051448-1051585:source	ENSG00000064687:1052213-1052285:target
DAZAP1	ENSG00000071626	chr19	+	1417499	1417539	1418202	1418369	1418664	1418730	ENSG00000071626:1417499-1417539:source	ENSG00000071626:1418665-1418730:target
MBD3	ENSG00000071655	chr19	-	1584538	1584953	1583251	1583379	1582324	1582711	ENSG00000071655:1582324-1582711:source	ENSG00000071655:1584539-1584953:target
TCF3	ENSG00000071564	chr19	-	1650175	1650744	1646681	1646817	1646354	1646426	ENSG00000071564:1646354-1646426:source	ENSG00000071564:1650176-1650744:target
DOT1L	ENSG00000104885	chr19	+	2185854	2185928	2188195	2188288	2189730	2189794	ENSG00000104885:2185854-2185928:source	ENSG00000104885:2189731-2189794:target
GNG7	ENSG00000176533	chr19	-	2520605	2520723	2516939	2517080	2513145	2515145	ENSG00000176533:2511217-2515145:source	ENSG00000176533:2520606-2520723:target
ZNF554	ENSG00000172006	chr19	+	2830556	2832492	2833160	2833267	2833678	2835678	ENSG00000172006:2830556-2832492:source	ENSG00000172006:2833679-2835771:target
FZR1	ENSG00000105325	chr19	+	3522954	3523056	3524407	3524670	3525865	3525991	ENSG00000105325:3522954-3523056:source	ENSG00000105325:3525866-3525991:target
CHAF1A	ENSG00000167670	chr19	+	4418017	4418073	4422562	4422792	4423331	4423392	ENSG00000167670:4418017-4418073:source	ENSG00000167670:4423332-4423392:target
ENSG00000034063	ENSG00000034063	chr19	+	4944355	4944462	4945872	4945977	4947116	4947223	ENSG00000034063:4944355-4944462:source	ENSG00000034063:4947117-4947223:target
PTPRS	ENSG00000105426	chr19	-	5229501	5229695	5229326	5229353	5225738	5225855	ENSG00000105426:5225738-5225855:source	ENSG00000105426:5229502-5229695:target
PTPRS	ENSG00000105426	chr19	-	5258027	5258165	5256118	5256130	5245787	5246056	ENSG00000105426:5245787-5246056:source	ENSG00000105426:5258028-5258165:target
MLLT1	ENSG00000130382	chr19	-	6270589	6270770	6262238	6262321	6230581	6230724	ENSG00000130382:6230581-6230724:source	ENSG00000130382:6270590-6270770:target
TNFSF9	ENSG00000125657	chr19	+	6531010	6531314	6532796	6532827	6534610	6535931	ENSG00000125657:6531010-6531314:source	ENSG00000125657:6534611-6535931:target
GPR108	ENSG00000125734	chr19	-	6736602	6736795	6735918	6735969	6735385	6735715	ENSG00000125734:6735385-6735715:source	ENSG00000125734:6736603-6736795:target
VAV1	ENSG00000141968	chr19	+	6850681	6850768	6852975	6853090	6853957	6854109	ENSG00000141968:6850681-6850768:source	ENSG00000141968:6853958-6854109:target
CAMSAP3	ENSG00000076826	chr19	+	7675586	7675679	7675762	7675817	7675980	7676054	ENSG00000076826:7675586-7675679:source	ENSG00000076826:7675981-7676054:target
TIMM44	ENSG00000104980	chr19	-	8008491	8008805	8005986	8006082	8002683	8003082	ENSG00000104980:8002683-8003082:source	ENSG00000104980:8008492-8008805:target
DNMT1	ENSG00000130816	chr19	-	10246411	10246528	10244892	10244983	10244021	10244377	ENSG00000130816:10244021-10244377:source	ENSG00000130816:10246412-10246528:target
DNMT1	ENSG00000130816	chr19	-	10284546	10284581	10283765	10283850	10279006	10279040	ENSG00000130816:10279006-10279040:source	ENSG00000130816:10284547-10284581:target
CARM1	ENSG00000142453	chr19	+	10982189	10982598	11015626	11015752	11018714	11018821	ENSG00000142453:10982189-10982598:source	ENSG00000142453:11018715-11018821:target
ZNF653	ENSG00000161914	chr19	-	11597583	11597695	11596470	11596585	11594827	11594956	ENSG00000161914:11594827-11594956:source	ENSG00000161914:11597584-11597695:target
ZNF700	ENSG00000196757	chr19	+	12057569	12058122	12058328	12058389	12059090	12061090	ENSG00000196757:12057569-12058122:source	ENSG00000196757:12059091-12061588:target
ZNF563	ENSG00000188868	chr19	-	12444293	12444534	12435732	12435793	12433399	12433525	ENSG00000188868:12433399-12433525:source	ENSG00000188868:12444294-12444534:target
ZNF791	ENSG00000173875	chr19	+	12734514	12734640	12735463	12735524	12738534	12740534	ENSG00000173875:12734514-12734640:source	ENSG00000173875:12738535-12742735:target
CCDC130	ENSG00000104957	chr19	+	13858593	13858768	13862421	13862625	13865102	13865156	ENSG00000104957:13858593-13858768:source	ENSG00000104957:13865103-13865156:target
DCAF15	ENSG00000132017	chr19	+	14063304	14063456	14063841	14064120	14065151	14065249	ENSG00000132017:14063304-14063456:source	ENSG00000132017:14065152-14065249:target
ADGRE5	ENSG00000123146	chr19	+	14491968	14492357	14499261	14499312	14499513	14499630	ENSG00000123146:14491968-14492357:source	ENSG00000123146:14499514-14499630:target
AP1M1	ENSG00000072958	chr19	+	16338948	16339019	16339580	16339739	16344303	16344429	ENSG00000072958:16338948-16339019:source	ENSG00000072958:16344304-16344429:target
BABAM1	ENSG00000105393	chr19	+	17379806	17379900	17382405	17382464	17384712	17384833	ENSG00000105393:17379806-17379900:source	ENSG00000105393:17384713-17384833:target
UPF1	ENSG00000005007	chr19	+	18973742	18974421	18974978	18975060	18976097	18976259	ENSG00000005007:18973742-18974421:source	ENSG00000005007:18976098-18976259:target
AC002985.3	ENSG00000268193	chr19	-	19023792	19023855	19021779	19021880	19017822	19017921	ENSG00000268193:19017822-19017921:source	ENSG00000268193:19023793-19023855:target
ZNF738	ENSG00000172687	chr19	+	21541732	21541945	21543276	21543398	21544567	21544660	ENSG00000172687:21541732-21541945:source	ENSG00000172687:21544568-21544660:target
CTD-2017D11.1	ENSG00000268362	chr19	+	24228986	24229081	24231738	24231816	24232206	24232350	ENSG00000268362:24228986-24229081:source	ENSG00000268362:24232207-24232350:target
ANKRD27	ENSG00000105186	chr19	-	33098540	33098738	33096740	33096860	33095169	33095330	ENSG00000105186:33095169-33095330:source	ENSG00000105186:33098541-33098738:target
ANKRD27	ENSG00000105186	chr19	-	33106563	33106686	33098540	33098738	33096741	33096860	ENSG00000105186:33096741-33096860:source	ENSG00000105186:33106564-33106686:target
ANKRD27	ENSG00000105186	chr19	-	33165976	33166105	33149819	33149951	33140588	33140698	ENSG00000105186:33140588-33140698:source	ENSG00000105186:33165977-33166105:target
GPATCH1	ENSG00000076650	chr19	+	33588661	33588808	33591078	33591180	33592400	33592480	ENSG00000076650:33588661-33588808:source	ENSG00000076650:33592401-33592480:target
KIAA0355	ENSG00000166398	chr19	+	34821094	34821252	34824608	34824706	34830771	34830897	ENSG00000166398:34821094-34821252:source	ENSG00000166398:34830772-34830897:target
UBA2	ENSG00000126261	chr19	+	34949619	34949829	34951374	34951471	34954930	34955036	ENSG00000126261:34949619-34949829:source	ENSG00000126261:34954931-34955036:target
ZNF181	ENSG00000197841	chr19	+	35225480	35225951	35226979	35227111	35230052	35230173	ENSG00000197841:35225480-35225951:source	ENSG00000197841:35230053-35230173:target
GRAMD1A	ENSG00000089351	chr19	+	35505873	35506871	35510094	35510213	35510294	35510437	ENSG00000089351:35505873-35506871:source	ENSG00000089351:35510295-35510437:target
HAUS5	ENSG00000249115	chr19	+	36108189	36108271	36108756	36108814	36108972	36109097	ENSG00000249115:36108189-36108271:source	ENSG00000249115:36108973-36109097:target
HAUS5	ENSG00000249115	chr19	+	36109789	36109951	36110325	36110406	36110514	36110660	ENSG00000249115:36109789-36109951:source	ENSG00000249115:36110515-36110660:target
COX6B1	ENSG00000126267	chr19	+	36142135	36142251	36145472	36145573	36149495	36149763	ENSG00000126267:36142135-36142251:source	ENSG00000126267:36149496-36149763:target
WDR62	ENSG00000075702	chr19	+	36549682	36549773	36549878	36549962	36550869	36552869	ENSG00000075702:36549682-36549773:source	ENSG00000075702:36550870-36553551:target
MAP4K1	ENSG00000104814	chr19	-	39090716	39090793	39090564	39090625	39088126	39088234	ENSG00000104814:39088126-39088234:source	ENSG00000104814:39090717-39090793:target
ACTN4	ENSG00000130402	chr19	+	39215071	39215205	39216363	39216543	39217596	39217743	ENSG00000130402:39215071-39215205:source	ENSG00000130402:39217597-39217743:target
PLEKHG2	ENSG00000090924	chr19	+	39905979	39906079	39906546	39906617	39906987	39907054	ENSG00000090924:39905979-39906079:source	ENSG00000090924:39906988-39907054:target
ZNF780B	ENSG00000128000	chr19	-	40556230	40556284	40554824	40554963	40554577	40554703	ENSG00000128000:40554577-40554703:source	ENSG00000128000:40556231-40556284:target
C19orf47	ENSG00000160392	chr19	-	40842016	40842131	40840741	40840811	40839758	40839836	ENSG00000160392:40839758-40839836:source	ENSG00000160392:40842017-40842131:target
ITPKC	ENSG00000086544	chr19	+	41235107	41235320	41239064	41239269	41242890	41242992	ENSG00000086544:41235107-41235320:source	ENSG00000086544:41242891-41242992:target
HNRNPUL1	ENSG00000105323	chr19	+	41798150	41798416	41798768	41798892	41800242	41800367	ENSG00000105323:41798150-41798416:source	ENSG00000105323:41800243-41800367:target
MEGF8	ENSG00000105429	chr19	+	42848822	42848985	42852423	42852624	42853650	42853851	ENSG00000105429:42848822-42848985:source	ENSG00000105429:42853651-42853851:target
CADM4	ENSG00000105767	chr19	-	44131317	44131470	44130935	44131070	44130276	44130440	ENSG00000105767:44130276-44130440:source	ENSG00000105767:44131318-44131470:target
ERCC2	ENSG00000104884	chr19	-	45857987	45858109	45857254	45857350	45856500	45856592	ENSG00000104884:45856500-45856592:source	ENSG00000104884:45857988-45858109:target
SIX5	ENSG00000177045	chr19	-	46271299	46271885	46269607	46270413	46268043	46269369	ENSG00000177045:46268043-46269369:source	ENSG00000177045:46271300-46271885:target
SYMPK	ENSG00000125755	chr19	-	46347287	46347458	46345507	46345747	46341719	46341873	ENSG00000125755:46341719-46341873:source	ENSG00000125755:46347288-46347458:target
LMTK3	ENSG00000142235	chr19	-	49004252	49004402	49003925	49004001	49001174	49003174	ENSG00000142235:49000650-49003174:source	ENSG00000142235:49004253-49004402:target
LMTK3	ENSG00000142235	chr19	-	49012693	49012770	49012391	49012505	49012108	49012226	ENSG00000142235:49012108-49012226:source	ENSG00000142235:49012694-49012770:target
GYS1	ENSG00000104812	chr19	-	49494558	49494795	49490450	49490642	49489107	49489292	ENSG00000104812:49489107-49489292:source	ENSG00000104812:49494559-49494795:target
SNRNP70	ENSG00000104852	chr19	+	49601899	49601961	49602071	49602220	49604646	49604925	ENSG00000104852:49601899-49601961:source	ENSG00000104852:49604647-49604925:target
EMC10	ENSG00000161671	chr19	+	50981186	50981258	50981721	50981877	50982213	50982323	ENSG00000161671:50981186-50981258:source	ENSG00000161671:50982214-50982323:target
ETFB	ENSG00000105379	chr19	-	51857403	51859403	51856385	51856544	51853441	51853645	ENSG00000105379:51853441-51853645:source	ENSG00000105379:51857404-51860360:target
PPP2R1A	ENSG00000105568	chr19	+	52705020	52705287	52709215	52709316	52714512	52714947	ENSG00000105568:52705020-52705287:source	ENSG00000105568:52714513-52714947:target
TNNT1	ENSG00000105048	chr19	-	55645254	55645295	55644920	55645042	55644162	55644328	ENSG00000105048:55644162-55644328:source	ENSG00000105048:55645255-55645295:target
AGRN	ENSG00000188157	chr1	+	986106	986217	986411	986423	986632	986749	ENSG00000188157:986106-986217:source	ENSG00000188157:986633-986749:target
C1orf159	ENSG00000131591	chr1	-	1021257	1021392	1020630	1020690	1019834	1019886	ENSG00000131591:1019834-1019886:source	ENSG00000131591:1021258-1021392:target
DVL1	ENSG00000107404	chr1	-	1273356	1273563	1272397	1272435	1270656	1271895	ENSG00000107404:1270656-1271895:source	ENSG00000107404:1273357-1273563:target
DVL1	ENSG00000107404	chr1	-	1278068	1278138	1277742	1277864	1277433	1277536	ENSG00000107404:1277433-1277536:source	ENSG00000107404:1278069-1278138:target
ATAD3A	ENSG00000197785	chr1	+	1455521	1455686	1455927	1455997	1458123	1458279	ENSG00000197785:1455521-1455686:source	ENSG00000197785:1458124-1458279:target
PANK4	ENSG00000157881	chr1	-	2447000	2447376	2446696	2446840	2445852	2445905	ENSG00000157881:2445852-2445905:source	ENSG00000157881:2447001-2447376:target
TPRG1L	ENSG00000158109	chr1	+	3541988	3542079	3542276	3542453	3544063	3544217	ENSG00000158109:3541988-3542079:source	ENSG00000158109:3544064-3544217:target
C1orf174	ENSG00000198912	chr1	-	3809446	3809560	3808189	3808343	3807133	3807621	ENSG00000198912:3807133-3807621:source	ENSG00000198912:3809447-3809560:target
NPHP4	ENSG00000131697	chr1	-	6029146	6029319	6027358	6027423	6021854	6022009	ENSG00000131697:6021854-6022009:source	ENSG00000131697:6029147-6029319:target
KCNAB2	ENSG00000069424	chr1	+	6142255	6142334	6144551	6144694	6145263	6145309	ENSG00000069424:6142255-6142334:source	ENSG00000069424:6145264-6145309:target
KCNAB2	ENSG00000069424	chr1	+	6149068	6149111	6149270	6149608	6150448	6150535	ENSG00000069424:6149068-6149111:source	ENSG00000069424:6150449-6150535:target
KCNAB2	ENSG00000069424	chr1	+	6150449	6150535	6151322	6151367	6154459	6154545	ENSG00000069424:6150449-6150535:source	ENSG00000069424:6154460-6154545:target
ZBTB48	ENSG00000204859	chr1	+	6640148	6640196	6640600	6641359	6642117	6642359	ENSG00000204859:6640148-6640196:source	ENSG00000204859:6642118-6642359:target
SLC25A33	ENSG00000171612	chr1	+	9633404	9633470	9640011	9640292	9642356	9644356	ENSG00000171612:9633404-9633470:source	ENSG00000171612:9642357-9645237:target
UBE4B	ENSG00000130939	chr1	+	10188397	10189506	10190557	10190674	10190772	10190871	ENSG00000130939:10188397-10189506:source	ENSG00000130939:10190773-10190871:target
UBE4B	ENSG00000130939	chr1	+	10195046	10195244	10197124	10197263	10204997	10205657	ENSG00000130939:10195046-10195244:source	ENSG00000130939:10204998-10205657:target
UBE4B	ENSG00000130939	chr1	+	10221200	10221344	10226301	10226400	10228193	10228328	ENSG00000130939:10221200-10221344:source	ENSG00000130939:10228194-10228328:target
KIF1B	ENSG00000054523	chr1	+	10332299	10332364	10333071	10333089	10335485	10335561	ENSG00000054523:10332299-10332364:source	ENSG00000054523:10335486-10335561:target
EXOSC10	ENSG00000171824	chr1	-	11155814	11155938	11155472	11155604	11151550	11151654	ENSG00000171824:11151550-11151654:source	ENSG00000171824:11155815-11155938:target
MTOR	ENSG00000198793	chr1	-	11172908	11172974	11171570	11171810	11169706	11169786	ENSG00000198793:11169706-11169786:source	ENSG00000198793:11172909-11172974:target
MAD2L2	ENSG00000116670	chr1	-	11740409	11740528	11737599	11737671	11736866	11737005	ENSG00000116670:11736866-11737005:source	ENSG00000116670:11740410-11740528:target
MTHFR	ENSG00000177000	chr1	-	11856262	11856456	11855154	11855405	11854786	11854920	ENSG00000177000:11854786-11854920:source	ENSG00000177000:11856263-11856456:target
CLCN6	ENSG00000011021	chr1	+	11867188	11867247	11875902	11875968	11876671	11876737	ENSG00000011021:11867188-11867247:source	ENSG00000011021:11876672-11876737:target
MFN2	ENSG00000116688	chr1	+	12066595	12066750	12067109	12067306	12069648	12069783	ENSG00000116688:12066595-12066750:source	ENSG00000116688:12069649-12069783:target
VPS13D	ENSG00000048707	chr1	+	12461661	12461757	12462620	12462755	12463877	12464026	ENSG00000048707:12461661-12461757:source	ENSG00000048707:12463878-12464026:target
CASP9	ENSG00000132906	chr1	-	15833393	15833628	15832484	15832574	15831106	15831253	ENSG00000132906:15831106-15831253:source	ENSG00000132906:15833394-15833628:target
DNAJC16	ENSG00000116138	chr1	+	15886021	15886151	15886625	15886824	15888636	15888820	ENSG00000116138:15886021-15886151:source	ENSG00000116138:15888637-15888820:target
PLEKHM2	ENSG00000116786	chr1	+	16042732	16042838	16043201	16043311	16044387	16044487	ENSG00000116786:16042732-16042838:source	ENSG00000116786:16044388-16044487:target
SPEN	ENSG00000065526	chr1	+	16174359	16174645	16194373	16194471	16199310	16199631	ENSG00000065526:16174359-16174645:source	ENSG00000065526:16199311-16199631:target
RCC2	ENSG00000179051	chr1	-	17755601	17755695	17752036	17752180	17749201	17749332	ENSG00000179051:17749201-17749332:source	ENSG00000179051:17755602-17755695:target
UBR4	ENSG00000127481	chr1	-	19415252	19415471	19414309	19414423	19413173	19413315	ENSG00000127481:19413173-19413315:source	ENSG00000127481:19415253-19415471:target
UBR4	ENSG00000127481	chr1	-	19422038	19422416	19421399	19421519	19420443	19420633	ENSG00000127481:19420443-19420633:source	ENSG00000127481:19422039-19422416:target
UBR4	ENSG00000127481	chr1	-	19426090	19426171	19423686	19423774	19423017	19423144	ENSG00000127481:19423017-19423144:source	ENSG00000127481:19426091-19426171:target
UBR4	ENSG00000127481	chr1	-	19452939	19453149	19452096	19452193	19450971	19451184	ENSG00000127481:19450971-19451184:source	ENSG00000127481:19452940-19453149:target
UBR4	ENSG00000127481	chr1	-	19477070	19477287	19476256	19476289	19475057	19475120	ENSG00000127481:19475057-19475120:source	ENSG00000127481:19477071-19477287:target
EIF4G3	ENSG00000075151	chr1	-	21155639	21155765	21154109	21154191	21151593	21151691	ENSG00000075151:21151593-21151691:source	ENSG00000075151:21155640-21155765:target
RAP1GAP	ENSG00000076864	chr1	-	21924453	21924588	21924178	21924221	21922708	21923757	ENSG00000076864:21922708-21923757:source	ENSG00000076864:21924454-21924588:target
USP48	ENSG00000090686	chr1	-	22030754	22031108	22030004	22030111	22027991	22028095	ENSG00000090686:22027991-22028095:source	ENSG00000090686:22030755-22031108:target
CDC42	ENSG00000070831	chr1	+	22404922	22405076	22405198	22405374	22408214	22408287	ENSG00000070831:22404922-22405076:source	ENSG00000070831:22408215-22408287:target
ZBTB40	ENSG00000184677	chr1	+	22778344	22778497	22779151	22779439	22816372	22817138	ENSG00000184677:22778344-22778497:source	ENSG00000184677:22816373-22817138:target
KDM1A	ENSG00000004487	chr1	+	23376880	23377013	23380253	23380332	23381561	23381911	ENSG00000004487:23376880-23377013:source	ENSG00000004487:23381562-23381911:target
FUCA1	ENSG00000179163	chr1	-	24186287	24186393	24183765	24183873	24180850	24181050	ENSG00000179163:24180850-24181050:source	ENSG00000179163:24186288-24186393:target
CLIC4	ENSG00000169504	chr1	+	25071848	25072116	25119667	25119704	25124232	25124454	ENSG00000169504:25071848-25072116:source	ENSG00000169504:25124233-25124454:target
CEP85	ENSG00000130695	chr1	+	26584634	26584751	26586107	26586293	26594973	26595126	ENSG00000130695:26584634-26584751:source	ENSG00000130695:26594974-26595126:target
RPS6KA1	ENSG00000117676	chr1	+	26878135	26878214	26879308	26879387	26879881	26880626	ENSG00000117676:26878135-26878214:source	ENSG00000117676:26879882-26880626:target
RPS6KA1	ENSG00000117676	chr1	+	26882028	26882116	26882566	26882654	26883144	26883209	ENSG00000117676:26882028-26882116:source	ENSG00000117676:26883145-26883209:target
ARID1A	ENSG00000117713	chr1	+	27059167	27059283	27060598	27060764	27087346	27087587	ENSG00000117713:27059167-27059283:source	ENSG00000117713:27087347-27087587:target
ZDHHC18	ENSG00000204160	chr1	+	27158938	27159098	27174197	27174315	27175098	27175248	ENSG00000204160:27158938-27159098:source	ENSG00000204160:27175099-27175248:target
AHDC1	ENSG00000126705	chr1	-	27929907	27930143	27917045	27917170	27885217	27885394	ENSG00000126705:27885217-27885394:source	ENSG00000126705:27929908-27930143:target
PPP1R8	ENSG00000117751	chr1	+	28165210	28165363	28167524	28167745	28169696	28169841	ENSG00000117751:28165210-28165363:source	ENSG00000117751:28169697-28169841:target
PHACTR4	ENSG00000204138	chr1	+	28785596	28785769	28786722	28786803	28792195	28792360	ENSG00000204138:28785596-28785769:source	ENSG00000204138:28792196-28792360:target
RCC1	ENSG00000180198	chr1	+	28861770	28861892	28862121	28862168	28862382	28862538	ENSG00000180198:28861770-28861892:source	ENSG00000180198:28862383-28862538:target
GMEB1	ENSG00000162419	chr1	+	29019454	29019557	29023438	29023596	29028949	29029081	ENSG00000162419:29019454-29019557:source	ENSG00000162419:29028950-29029081:target
KHDRBS1	ENSG00000121774	chr1	+	32495899	32496023	32497124	32497241	32498788	32498935	ENSG00000121774:32495899-32496023:source	ENSG00000121774:32498789-32498935:target
PHC2	ENSG00000134686	chr1	-	33797875	33798005	33797225	33797300	33796949	33797063	ENSG00000134686:33796949-33797063:source	ENSG00000134686:33797876-33798005:target
ZMYM4	ENSG00000146463	chr1	+	35862153	35862271	35862652	35862724	35862977	35863146	ENSG00000146463:35862153-35862271:source	ENSG00000146463:35862978-35863146:target
AGO1	ENSG00000092847	chr1	+	36367805	36367938	36372535	36372720	36379442	36379602	ENSG00000092847:36367805-36367938:source	ENSG00000092847:36379443-36379602:target
ADPRHL2	ENSG00000116863	chr1	+	36554476	36554716	36556844	36556941	36557218	36557426	ENSG00000116863:36554476-36554716:source	ENSG00000116863:36557219-36557426:target
MEAF6	ENSG00000163875	chr1	-	37975055	37975143	37974878	37974924	37967016	37967597	ENSG00000163875:37967016-37967597:source	ENSG00000163875:37975056-37975143:target
CDCA8	ENSG00000134690	chr1	+	38167426	38167490	38168923	38169019	38171112	38171239	ENSG00000134690:38167426-38167490:source	ENSG00000134690:38171113-38171239:target
AKIRIN1	ENSG00000174574	chr1	+	39456895	39457272	39463842	39463983	39466643	39466778	ENSG00000174574:39456895-39457272:source	ENSG00000174574:39466644-39466778:target
AKIRIN1	ENSG00000174574	chr1	+	39463843	39463983	39466643	39466778	39469018	39469090	ENSG00000174574:39463843-39463983:source	ENSG00000174574:39469019-39469090:target
AKIRIN1	ENSG00000174574	chr1	+	39466644	39466778	39469018	39469090	39469716	39471716	ENSG00000174574:39466644-39466778:source	ENSG00000174574:39469717-39471731:target
MACF1	ENSG00000127603	chr1	+	39833820	39833986	39835701	39835858	39838150	39839145	ENSG00000127603:39833820-39833986:source	ENSG00000127603:39838151-39839145:target
MACF1	ENSG00000127603	chr1	+	39903449	39903680	39904945	39905172	39906674	39906797	ENSG00000127603:39903449-39903680:source	ENSG00000127603:39906675-39906797:target
MACF1	ENSG00000127603	chr1	+	39934265	39934404	39935218	39935287	39945469	39945788	ENSG00000127603:39934265-39934404:source	ENSG00000127603:39945470-39945788:target
RLF	ENSG00000117000	chr1	+	40627045	40627308	40654726	40654881	40656443	40656525	ENSG00000117000:40627045-40627308:source	ENSG00000117000:40656444-40656525:target
ZMPSTE24	ENSG00000084073	chr1	+	40723779	40724066	40725021	40725204	40726510	40726657	ENSG00000084073:40723779-40724066:source	ENSG00000084073:40726511-40726657:target
YBX1	ENSG00000065978	chr1	+	43161870	43161959	43162312	43162615	43162850	43162933	ENSG00000065978:43161870-43161959:source	ENSG00000065978:43162851-43162933:target
EBNA1BP2	ENSG00000117395	chr1	-	43632830	43632906	43632496	43632590	43630314	43630476	ENSG00000117395:43630314-43630476:source	ENSG00000117395:43632831-43632906:target
PIK3R3	ENSG00000117461	chr1	-	46512222	46512297	46511589	46511760	46507543	46509543	ENSG00000117461:46505812-46509543:source	ENSG00000117461:46512223-46512297:target
SPATA6	ENSG00000132122	chr1	-	48860938	48861026	48858926	48858972	48850981	48851021	ENSG00000132122:48850981-48851021:source	ENSG00000132122:48860939-48861026:target
FAF1	ENSG00000185104	chr1	-	50941135	50941351	50917464	50917865	50905195	50907195	ENSG00000185104:50905150-50907195:source	ENSG00000185104:50941136-50941351:target
EPS15	ENSG00000085832	chr1	-	51864703	51864837	51862782	51862883	51859884	51860119	ENSG00000085832:51859884-51860119:source	ENSG00000085832:51864704-51864837:target
OSBPL9	ENSG00000117859	chr1	+	52082546	52082893	52117662	52117713	52135105	52135184	ENSG00000117859:52082546-52082893:source	ENSG00000117859:52135106-52135184:target
NRD1	ENSG00000078618	chr1	-	52257717	52257770	52257249	52257333	52256572	52256662	ENSG00000078618:52256572-52256662:source	ENSG00000078618:52257718-52257770:target
NRD1	ENSG00000078618	chr1	-	52274986	52275073	52272465	52272585	52271182	52271233	ENSG00000078618:52271182-52271233:source	ENSG00000078618:52274987-52275073:target
NRD1	ENSG00000078618	chr1	-	52287169	52287227	52285471	52285545	52283738	52283807	ENSG00000078618:52283738-52283807:source	ENSG00000078618:52287170-52287227:target
ZCCHC11	ENSG00000134744	chr1	-	52975267	52975384	52962677	52962855	52961099	52961187	ENSG00000134744:52961099-52961187:source	ENSG00000134744:52975268-52975384:target
SCP2	ENSG00000116171	chr1	+	53407468	53407525	53413680	53413752	53416426	53416558	ENSG00000116171:53407468-53407525:source	ENSG00000116171:53416427-53416558:target
SCP2	ENSG00000116171	chr1	+	53427175	53427301	53440440	53440504	53442354	53442441	ENSG00000116171:53427175-53427301:source	ENSG00000116171:53442355-53442441:target
SCP2	ENSG00000116171	chr1	+	53493641	53493743	53504588	53504718	53513529	53514187	ENSG00000116171:53493641-53493743:source	ENSG00000116171:53513530-53514187:target
NDC1	ENSG00000058804	chr1	-	54275367	54275419	54273328	54273464	54272098	54272190	ENSG00000058804:54272098-54272190:source	ENSG00000058804:54275368-54275419:target
USP24	ENSG00000162402	chr1	-	55551614	55552107	55550065	55550094	55549445	55549561	ENSG00000162402:55549445-55549561:source	ENSG00000162402:55551615-55552107:target
USP24	ENSG00000162402	chr1	-	55620343	55620451	55620043	55620139	55619792	55619953	ENSG00000162402:55619792-55619953:source	ENSG00000162402:55620344-55620451:target
ATG4C	ENSG00000125703	chr1	+	63294711	63294847	63297030	63297066	63299708	63299787	ENSG00000125703:63294711-63294847:source	ENSG00000125703:63299709-63299787:target
ITGB3BP	ENSG00000142856	chr1	-	63920560	63920639	63920050	63920144	63919589	63919645	ENSG00000142856:63919589-63919645:source	ENSG00000142856:63920561-63920639:target
ANKRD13C	ENSG00000118454	chr1	-	70781163	70781249	70779427	70779473	70771907	70771973	ENSG00000118454:70771907-70771973:source	ENSG00000118454:70781164-70781249:target
CTH	ENSG00000116761	chr1	+	70887249	70887358	70889967	70890099	70895476	70895534	ENSG00000116761:70887249-70887358:source	ENSG00000116761:70895477-70895534:target
PIGK	ENSG00000142892	chr1	-	77634944	77635080	77632403	77632515	77629531	77629627	ENSG00000142892:77629531-77629627:source	ENSG00000142892:77634945-77635080:target
PKN2	ENSG00000065243	chr1	+	89149905	89150311	89206670	89206971	89225904	89226059	ENSG00000065243:89149905-89150311:source	ENSG00000065243:89225905-89226059:target
PKN2	ENSG00000065243	chr1	+	89273367	89273458	89279239	89279416	89287623	89287686	ENSG00000065243:89273367-89273458:source	ENSG00000065243:89287624-89287686:target
GTF2B	ENSG00000137947	chr1	-	89325564	89325694	89324363	89324470	89322889	89323170	ENSG00000137947:89322889-89323170:source	ENSG00000137947:89325565-89325694:target
ZNF326	ENSG00000162664	chr1	+	90486351	90486481	90487808	90487904	90492912	90494912	ENSG00000162664:90486351-90486481:source	ENSG00000162664:90492913-90501090:target
CDC7	ENSG00000097046	chr1	+	91978615	91978864	91979504	91979600	91980375	91980554	ENSG00000097046:91978615-91978864:source	ENSG00000097046:91980376-91980554:target
RPAP2	ENSG00000122484	chr1	+	92765751	92765796	92767032	92767147	92769533	92769632	ENSG00000122484:92765751-92765796:source	ENSG00000122484:92769534-92769632:target
DR1	ENSG00000117505	chr1	+	93811870	93812422	93815475	93815558	93819464	93819632	ENSG00000117505:93811870-93812422:source	ENSG00000117505:93819465-93819632:target
DPYD	ENSG00000188641	chr1	-	98386439	98386605	98348819	98348930	98293670	98293752	ENSG00000188641:98293670-98293752:source	ENSG00000188641:98386440-98386605:target
HIAT1	ENSG00000156875	chr1	+	100533533	100533751	100534028	100534142	100535169	100535241	ENSG00000156875:100533533-100533751:source	ENSG00000156875:100535170-100535241:target
DBT	ENSG00000137992	chr1	-	100684181	100684303	100681538	100681755	100680373	100680539	ENSG00000137992:100680373-100680539:source	ENSG00000137992:100684182-100684303:target
RNPC3	ENSG00000185946	chr1	+	104068593	104068884	104070316	104070364	104076360	104076479	ENSG00000185946:104068593-104068884:source	ENSG00000185946:104076361-104076479:target
SLC25A24	ENSG00000085491	chr1	-	108728449	108728576	108724562	108724650	108703804	108703915	ENSG00000085491:108703804-108703915:source	ENSG00000085491:108728450-108728576:target
STXBP3	ENSG00000116266	chr1	+	109340767	109340859	109342841	109342927	109350022	109350171	ENSG00000116266:109340767-109340859:source	ENSG00000116266:109350023-109350171:target
GPSM2	ENSG00000121957	chr1	+	109441501	109441616	109444411	109444567	109445747	109445856	ENSG00000121957:109441501-109441616:source	ENSG00000121957:109445748-109445856:target
TAF13	ENSG00000197780	chr1	-	109618542	109618624	109617608	109617687	109608419	109608854	ENSG00000197780:109608419-109608854:source	ENSG00000197780:109618543-109618624:target
SORT1	ENSG00000134243	chr1	-	109857293	109857400	109856882	109857006	109854679	109856679	ENSG00000134243:109852192-109856679:source	ENSG00000134243:109857294-109857400:target
DRAM2	ENSG00000156171	chr1	-	111662498	111662583	111662236	111662303	111661182	111661519	ENSG00000156171:111661182-111661519:source	ENSG00000156171:111662499-111662583:target
DRAM2	ENSG00000156171	chr1	-	111674045	111674190	111668848	111668916	111667364	111667503	ENSG00000156171:111667364-111667503:source	ENSG00000156171:111674046-111674190:target
CEPT1	ENSG00000134255	chr1	+	111690264	111690675	111695895	111695993	111702001	111703592	ENSG00000134255:111690264-111690675:source	ENSG00000134255:111702002-111703592:target
RAP1A	ENSG00000116473	chr1	+	112240063	112240119	112242108	112242229	112245957	112246098	ENSG00000116473:112240063-112240119:source	ENSG00000116473:112245958-112246098:target
CAPZA1	ENSG00000116489	chr1	+	113161795	113162505	113189376	113189416	113189831	113189895	ENSG00000116489:113161795-113162505:source	ENSG00000116489:113189832-113189895:target
MOV10	ENSG00000155363	chr1	+	113232462	113232720	113234286	113234421	113235382	113235551	ENSG00000155363:113232462-113232720:source	ENSG00000155363:113235383-113235551:target
RSBN1	ENSG00000081019	chr1	-	114339984	114340658	114338807	114338925	114320293	114320430	ENSG00000081019:114320293-114320430:source	ENSG00000081019:114339985-114340658:target
BCAS2	ENSG00000116752	chr1	-	115123919	115124012	115119308	115119379	115118211	115118372	ENSG00000116752:115118211-115118372:source	ENSG00000116752:115123920-115124012:target
ATP1A1	ENSG00000163399	chr1	+	116936153	116936345	116937731	116937907	116939219	116939356	ENSG00000163399:116936153-116936345:source	ENSG00000163399:116939220-116939356:target
CD58	ENSG00000116815	chr1	-	117086932	117087226	117078586	117078850	117064409	117064605	ENSG00000116815:117064409-117064605:source	ENSG00000116815:117086933-117087226:target
ENSG00000152022	ENSG00000152022	chr1	+	145477085	145477450	145487303	145487467	145492234	145492375	ENSG00000152022:145477085-145477450:source	ENSG00000152022:145492235-145492375:target
ENSG00000122497	ENSG00000122497	chr1	-	148023596	148023669	148022926	148023132	148021577	148021628	ENSG00000122497:148021577-148021628:source	ENSG00000122497:148023597-148023669:target
ENSG00000122497	ENSG00000122497	chr1	-	148024710	148024925	148023596	148023669	148022927	148023132	ENSG00000122497:148022927-148023132:source	ENSG00000122497:148024711-148024925:target
SETDB1	ENSG00000143379	chr1	+	150915039	150915164	150915327	150915529	150916395	150916469	ENSG00000143379:150915039-150915164:source	ENSG00000143379:150916396-150916469:target
ILF2	ENSG00000143621	chr1	-	153636871	153636950	153636518	153636606	153635691	153635752	ENSG00000143621:153635691-153635752:source	ENSG00000143621:153636872-153636950:target
INTS3	ENSG00000143624	chr1	+	153742674	153742787	153743160	153743209	153744271	153744439	ENSG00000143624:153742674-153742787:source	ENSG00000143624:153744272-153744439:target
ATP8B2	ENSG00000143515	chr1	+	154317798	154318021	154318275	154318359	154318706	154318952	ENSG00000143515:154317798-154318021:source	ENSG00000143515:154318707-154318952:target
CLK2	ENSG00000176444	chr1	-	155234258	155234341	155234011	155234091	155233741	155233831	ENSG00000176444:155233741-155233831:source	ENSG00000176444:155234259-155234341:target
GON4L	ENSG00000116580	chr1	-	155733102	155733355	155731980	155732165	155730235	155730432	ENSG00000116580:155730235-155730432:source	ENSG00000116580:155733103-155733355:target
ARHGEF2	ENSG00000116584	chr1	-	155927503	155927673	155924692	155924760	155922419	155922619	ENSG00000116584:155922419-155922619:source	ENSG00000116584:155927504-155927673:target
TAGLN2	ENSG00000158710	chr1	-	159889450	159889625	159889063	159889166	159887897	159888731	ENSG00000158710:159887897-159888731:source	ENSG00000158710:159889451-159889625:target
NCSTN	ENSG00000162736	chr1	+	160321844	160321996	160322676	160322781	160322949	160323027	ENSG00000162736:160321844-160321996:source	ENSG00000162736:160322950-160323027:target
F11R	ENSG00000158769	chr1	-	160990799	160991138	160972329	160972403	160971075	160971143	ENSG00000158769:160971075-160971143:source	ENSG00000158769:160990800-160991138:target
ARHGAP30	ENSG00000186517	chr1	-	161022075	161022153	161021103	161021505	161019214	161019479	ENSG00000186517:161019214-161019479:source	ENSG00000186517:161022076-161022153:target
UHMK1	ENSG00000152332	chr1	+	162470703	162470894	162473543	162473638	162482289	162482366	ENSG00000152332:162470703-162470894:source	ENSG00000152332:162482290-162482366:target
UHMK1	ENSG00000152332	chr1	+	162482515	162482613	162487891	162487980	162492193	162494193	ENSG00000152332:162482515-162482613:source	ENSG00000152332:162492194-162499419:target
NUF2	ENSG00000143228	chr1	+	163297278	163297352	163297687	163297720	163298017	163298094	ENSG00000143228:163297278-163297352:source	ENSG00000143228:163298018-163298094:target
SFT2D2	ENSG00000213064	chr1	+	168201072	168201157	168204338	168204420	168205826	168205862	ENSG00000213064:168201072-168201157:source	ENSG00000213064:168205827-168205862:target
C1orf112	ENSG00000000460	chr1	+	169799837	169799888	169801557	169801647	169806067	169806253	ENSG00000000460:169799837-169799888:source	ENSG00000000460:169806068-169806253:target
KIFAP3	ENSG00000075945	chr1	-	169923151	169923251	169894927	169894996	169890467	169890922	ENSG00000075945:169890467-169890922:source	ENSG00000075945:169923152-169923251:target
KIFAP3	ENSG00000075945	chr1	-	170015852	170016007	170010817	170010981	170008374	170008429	ENSG00000075945:170008374-170008429:source	ENSG00000075945:170015853-170016007:target
KIFAP3	ENSG00000075945	chr1	-	170043576	170043836	170024445	170024577	170015853	170016007	ENSG00000075945:170015853-170016007:source	ENSG00000075945:170043577-170043836:target
SUCO	ENSG00000094975	chr1	+	172544658	172544763	172546678	172546699	172546903	172546959	ENSG00000094975:172544658-172544763:source	ENSG00000094975:172546904-172546959:target
DARS2	ENSG00000117593	chr1	+	173797471	173797537	173799797	173799899	173800672	173800768	ENSG00000117593:173797471-173797537:source	ENSG00000117593:173800673-173800768:target
DARS2	ENSG00000117593	chr1	+	173803611	173803657	173806077	173806184	173807327	173807397	ENSG00000117593:173803611-173803657:source	ENSG00000117593:173807328-173807397:target
DARS2	ENSG00000117593	chr1	+	173822487	173822705	173822932	173823043	173825803	173825879	ENSG00000117593:173822487-173822705:source	ENSG00000117593:173825804-173825879:target
RALGPS2	ENSG00000116191	chr1	+	178745817	178745956	178753552	178753657	178754691	178754742	ENSG00000116191:178745817-178745956:source	ENSG00000116191:178754692-178754742:target
TOR1AIP2	ENSG00000169905	chr1	-	179819979	179820498	179817359	179817523	179816670	179816771	ENSG00000169905:179816670-179816771:source	ENSG00000169905:179819980-179820498:target
CEP350	ENSG00000135837	chr1	+	180010797	180010937	180012190	180012327	180013185	180013308	ENSG00000135837:180010797-180010937:source	ENSG00000135837:180013186-180013308:target
QSOX1	ENSG00000116260	chr1	+	180144456	180144501	180145065	180145168	180147928	180148019	ENSG00000116260:180144456-180144501:source	ENSG00000116260:180147929-180148019:target
DHX9	ENSG00000135829	chr1	+	182852655	182852770	182853747	182853948	182856217	182856886	ENSG00000135829:182852655-182852770:source	ENSG00000135829:182856218-182856886:target
RGL1	ENSG00000143344	chr1	+	183816700	183816908	183830357	183830440	183835129	183835207	ENSG00000143344:183816700-183816908:source	ENSG00000143344:183835130-183835207:target
RGL1	ENSG00000143344	chr1	+	183866942	183867031	183869283	183869370	183871701	183871734	ENSG00000143344:183866942-183867031:source	ENSG00000143344:183871702-183871734:target
EDEM3	ENSG00000116406	chr1	-	184671944	184672130	184670630	184670678	184662957	184663606	ENSG00000116406:184662957-184663606:source	ENSG00000116406:184671945-184672130:target
RNF2	ENSG00000121481	chr1	+	185062193	185062408	185067203	185067476	185068922	185069094	ENSG00000121481:185062193-185062408:source	ENSG00000121481:185068923-185069094:target
IVNS1ABP	ENSG00000116679	chr1	-	185278514	185278643	185278134	185278304	185277932	185278007	ENSG00000116679:185277932-185278007:source	ENSG00000116679:185278515-185278643:target
TPR	ENSG00000047410	chr1	-	186310159	186310291	186308773	186308904	186307165	186307375	ENSG00000047410:186307165-186307375:source	ENSG00000047410:186310160-186310291:target
TPR	ENSG00000047410	chr1	-	186340101	186340175	186337017	186337114	186332474	186332577	ENSG00000047410:186332474-186332577:source	ENSG00000047410:186340102-186340175:target
RGS2	ENSG00000116741	chr1	+	192778169	192778311	192778587	192778665	192779295	192779397	ENSG00000116741:192778169-192778311:source	ENSG00000116741:192779296-192779397:target
CDC73	ENSG00000134371	chr1	+	193094242	193094347	193096977	193097268	193099303	193099373	ENSG00000134371:193094242-193094347:source	ENSG00000134371:193099304-193099373:target
CDC73	ENSG00000134371	chr1	+	193202123	193202284	193205385	193205486	193218859	193219001	ENSG00000134371:193202123-193202284:source	ENSG00000134371:193218860-193219001:target
PTPRC	ENSG00000081237	chr1	+	198691545	198691605	198696016	198696269	198697468	198697577	ENSG00000081237:198691545-198691605:source	ENSG00000081237:198697469-198697577:target
KIF21B	ENSG00000116852	chr1	-	200969010	200969092	200968476	200968594	200967512	200967703	ENSG00000116852:200967512-200967703:source	ENSG00000116852:200969011-200969092:target
KIF21B	ENSG00000116852	chr1	-	200992470	200992828	200980085	200980162	200978394	200978616	ENSG00000116852:200978394-200978616:source	ENSG00000116852:200992471-200992828:target
IPO9	ENSG00000198700	chr1	+	201816680	201816766	201817520	201817722	201821231	201821320	ENSG00000198700:201816680-201816766:source	ENSG00000198700:201821232-201821320:target
IPO9	ENSG00000198700	chr1	+	201824252	201824310	201824910	201825062	201826223	201826322	ENSG00000198700:201824252-201824310:source	ENSG00000198700:201826224-201826322:target
KLHL12	ENSG00000117153	chr1	-	202887298	202887516	202884858	202884900	202880182	202880331	ENSG00000117153:202880182-202880331:source	ENSG00000117153:202887299-202887516:target
ATP2B4	ENSG00000058668	chr1	+	203672780	203672941	203676136	203676351	203676989	203677232	ENSG00000058668:203672780-203672941:source	ENSG00000058668:203676990-203677232:target
ZC3H11A	ENSG00000058673	chr1	+	203799251	203799331	203800788	203800899	203802918	203802981	ENSG00000058673:203799251-203799331:source	ENSG00000058673:203802919-203802981:target
PIK3C2B	ENSG00000133056	chr1	-	204403566	204403736	204402920	204403077	204402444	204402553	ENSG00000133056:204402444-204402553:source	ENSG00000133056:204403567-204403736:target
PIK3C2B	ENSG00000133056	chr1	-	204416563	204416706	204416052	204416151	204415215	204415272	ENSG00000133056:204415215-204415272:source	ENSG00000133056:204416564-204416706:target
PIK3C2B	ENSG00000133056	chr1	-	204429005	204429069	204428303	204428610	204426856	204427002	ENSG00000133056:204426856-204427002:source	ENSG00000133056:204429006-204429069:target
RBBP5	ENSG00000117222	chr1	-	205090982	205091143	205084985	205085011	205083917	205084089	ENSG00000117222:205083917-205084089:source	ENSG00000117222:205090983-205091143:target
NUCKS1	ENSG00000069275	chr1	-	205719084	205719404	205710097	205710418	205698700	205698749	ENSG00000069275:205698700-205698749:source	ENSG00000069275:205719085-205719404:target
EIF2D	ENSG00000143486	chr1	-	206785639	206785904	206784808	206784937	206784501	206784727	ENSG00000143486:206784501-206784727:source	ENSG00000143486:206785640-206785904:target
CD55	ENSG00000196352	chr1	+	207494853	207495210	207495580	207495634	207495726	207495912	ENSG00000196352:207494853-207495210:source	ENSG00000196352:207495727-207495912:target
DTL	ENSG00000143476	chr1	+	212240154	212240227	212241565	212241669	212241940	212242045	ENSG00000143476:212240154-212240227:source	ENSG00000143476:212241941-212242045:target
NENF	ENSG00000117691	chr1	+	212615888	212615967	212617680	212617784	212619171	212619714	ENSG00000117691:212615888-212615967:source	ENSG00000117691:212619172-212619714:target
NSL1	ENSG00000117697	chr1	-	212964871	212965124	212960900	212960979	212957483	212957835	ENSG00000117697:212957483-212957835:source	ENSG00000117697:212964872-212965124:target
RPS6KC1	ENSG00000136643	chr1	+	213415912	213416001	213427329	213427435	213434900	213434983	ENSG00000136643:213415912-213416001:source	ENSG00000136643:213434901-213434983:target
CENPF	ENSG00000117724	chr1	+	214822018	214822170	214825052	214825229	214826170	214826332	ENSG00000117724:214822018-214822170:source	ENSG00000117724:214826171-214826332:target
EPRS	ENSG00000136628	chr1	-	220195688	220195860	220193329	220193563	220192337	220192421	ENSG00000136628:220192337-220192421:source	ENSG00000136628:220195689-220195860:target
EPRS	ENSG00000136628	chr1	-	220205728	220205868	220203727	220203822	220198474	220198600	ENSG00000136628:220198474-220198600:source	ENSG00000136628:220205729-220205868:target
RAB3GAP2	ENSG00000118873	chr1	-	220384296	220384344	220384142	220384218	220383730	220383831	ENSG00000118873:220383730-220383831:source	ENSG00000118873:220384297-220384344:target
RP11-504P24.2	ENSG00000232372	chr1	-	224174276	224174342	224172083	224172142	224170893	224170987	ENSG00000232372:224170893-224170987:source	ENSG00000232372:224174277-224174342:target
ENAH	ENSG00000154380	chr1	-	225742607	225742785	225723208	225723265	225718256	225718340	ENSG00000154380:225718256-225718340:source	ENSG00000154380:225742608-225742785:target
LIN9	ENSG00000183814	chr1	-	226426671	226426797	226426195	226426321	226421045	226421224	ENSG00000183814:226421045-226421224:source	ENSG00000183814:226426672-226426797:target
ITPKB	ENSG00000143772	chr1	-	226827257	226827359	226825379	226825451	226820587	226822587	ENSG00000143772:226819391-226822587:source	ENSG00000143772:226827258-226827359:target
CDC42BPA	ENSG00000143776	chr1	-	227203780	227203898	227198578	227198764	227191756	227192812	ENSG00000143776:227191756-227192812:source	ENSG00000143776:227203781-227203898:target
OBSCN	ENSG00000154358	chr1	+	228529820	228529933	228536733	228536811	228537590	228537758	ENSG00000154358:228529820-228529933:source	ENSG00000154358:228537591-228537758:target
NUP133	ENSG00000069248	chr1	-	229600370	229600622	229599289	229599423	229596358	229596516	ENSG00000069248:229596358-229596516:source	ENSG00000069248:229600371-229600622:target
NUP133	ENSG00000069248	chr1	-	229623212	229623364	229622768	229622874	229622118	229622275	ENSG00000069248:229622118-229622275:source	ENSG00000069248:229623213-229623364:target
ABCB10	ENSG00000135776	chr1	-	229684980	229685181	229683245	229683448	229677984	229678118	ENSG00000135776:229677984-229678118:source	ENSG00000135776:229684981-229685181:target
GALNT2	ENSG00000143641	chr1	+	230338883	230339036	230371759	230371858	230372098	230372166	ENSG00000143641:230338883-230339036:source	ENSG00000143641:230372099-230372166:target
TTC13	ENSG00000143643	chr1	-	231064682	231064839	231063801	231063917	231061263	231061393	ENSG00000143643:231061263-231061393:source	ENSG00000143643:231064683-231064839:target
PCNXL2	ENSG00000135749	chr1	-	233353776	233353930	233353644	233353677	233344405	233344435	ENSG00000135749:233344405-233344435:source	ENSG00000135749:233353777-233353930:target
TBCE	ENSG00000116957	chr1	+	235543334	235543464	235564817	235564902	235577747	235577933	ENSG00000116957:235543334-235543464:source	ENSG00000116957:235577748-235577933:target
MTR	ENSG00000116984	chr1	+	236969444	236969533	236972003	236972073	236973802	236973895	ENSG00000116984:236969444-236969533:source	ENSG00000116984:236973803-236973895:target
SCCPDH	ENSG00000143653	chr1	+	246890194	246890306	246899276	246899357	246903473	246903603	ENSG00000143653:246890194-246890306:source	ENSG00000143653:246903474-246903603:target
CARS	ENSG00000110619	chr11	-	3038335	3038525	3037010	3037079	3033425	3033506	ENSG00000110619:3033425-3033506:source	ENSG00000110619:3038336-3038525:target
FAM160A2	ENSG00000051009	chr11	-	6244309	6244468	6244040	6244127	6243672	6243839	ENSG00000051009:6243672-6243839:source	ENSG00000051009:6244310-6244468:target
TIMM10B	ENSG00000132286	chr11	+	6502677	6502785	6502986	6503082	6503274	6504028	ENSG00000132286:6502677-6502785:source	ENSG00000132286:6503275-6504028:target
TIMM10B	ENSG00000265264	chr11	+	6502715	6502785	6502986	6503082	6503274	6503519	ENSG00000265264:6502715-6502785:source	ENSG00000265264:6503275-6503519:target
TMEM41B	ENSG00000166471	chr11	-	9335867	9336327	9321130	9321248	9316643	9316934	ENSG00000166471:9316643-9316934:source	ENSG00000166471:9335868-9336327:target
RNF141	ENSG00000110315	chr11	-	10555562	10555752	10553373	10553562	10552190	10552298	ENSG00000110315:10552190-10552298:source	ENSG00000110315:10555563-10555752:target
COPB1	ENSG00000129083	chr11	-	14490226	14490406	14488654	14488723	14487828	14487972	ENSG00000129083:14487828-14487972:source	ENSG00000129083:14490227-14490406:target
PIK3C2A	ENSG00000011405	chr11	-	17118603	17118811	17115807	17115932	17113706	17113823	ENSG00000011405:17113706-17113823:source	ENSG00000011405:17118604-17118811:target
PRMT3	ENSG00000185238	chr11	+	20409076	20409320	20409564	20409700	20411289	20411372	ENSG00000185238:20409076-20409320:source	ENSG00000185238:20411290-20411372:target
PRMT3	ENSG00000185238	chr11	+	20427578	20429578	20448311	20448411	20473675	20473754	ENSG00000185238:20426992-20429578:source	ENSG00000185238:20473676-20473754:target
LIN7C	ENSG00000148943	chr11	-	27523348	27523467	27523041	27523113	27520906	27521115	ENSG00000148943:27520906-27521115:source	ENSG00000148943:27523349-27523467:target
EIF3M	ENSG00000149100	chr11	+	32623308	32623368	32623624	32623660	32623824	32625824	ENSG00000149100:32623308-32623368:source	ENSG00000149100:32623825-32627808:target
QSER1	ENSG00000060749	chr11	+	32979352	32979632	32987845	32987983	32990591	32990689	ENSG00000060749:32979352-32979632:source	ENSG00000060749:32990592-32990689:target
TCP11L1	ENSG00000176148	chr11	+	33080505	33080641	33083075	33083272	33087375	33087557	ENSG00000176148:33080505-33080641:source	ENSG00000176148:33087376-33087557:target
PDHX	ENSG00000110435	chr11	+	34938119	34938362	34952950	34953031	34969052	34969153	ENSG00000110435:34938119-34938362:source	ENSG00000110435:34969053-34969153:target
TRIM44	ENSG00000166326	chr11	+	35706807	35706884	35747471	35747711	35756973	35756993	ENSG00000166326:35706807-35706884:source	ENSG00000166326:35756974-35756993:target
COMMD9	ENSG00000110442	chr11	-	36310911	36310999	36302261	36302387	36299751	36300166	ENSG00000110442:36299751-36300166:source	ENSG00000110442:36310912-36310999:target
TRAF6	ENSG00000175104	chr11	-	36531597	36531822	36523268	36523361	36522770	36523087	ENSG00000175104:36522770-36523087:source	ENSG00000175104:36531598-36531822:target
EXT2	ENSG00000151348	chr11	+	44255665	44255793	44257842	44257925	44265698	44266979	ENSG00000151348:44255665-44255793:source	ENSG00000151348:44265699-44266979:target
TP53I11	ENSG00000175274	chr11	-	44959757	44959968	44959105	44959164	44958855	44958903	ENSG00000175274:44958855-44958903:source	ENSG00000175274:44959758-44959968:target
DGKZ	ENSG00000149091	chr11	+	46390914	46391100	46391490	46391559	46392862	46392934	ENSG00000149091:46390914-46391100:source	ENSG00000149091:46392863-46392934:target
PACSIN3	ENSG00000165912	chr11	-	47200444	47200581	47199916	47200038	47199076	47199597	ENSG00000165912:47199076-47199597:source	ENSG00000165912:47200445-47200581:target
DDB2	ENSG00000134574	chr11	+	47237887	47238023	47238408	47238600	47254364	47254510	ENSG00000134574:47237887-47238023:source	ENSG00000134574:47254365-47254510:target
ACP2	ENSG00000134575	chr11	-	47270226	47270457	47269588	47269684	47268944	47269278	ENSG00000134575:47268944-47269278:source	ENSG00000134575:47270227-47270457:target
SSRP1	ENSG00000149136	chr11	-	57099625	57099754	57099141	57099363	57098329	57098401	ENSG00000149136:57098329-57098401:source	ENSG00000149136:57099626-57099754:target
UBE2L6	ENSG00000156587	chr11	-	57327809	57327989	57324707	57324958	57321910	57322096	ENSG00000156587:57321910-57322096:source	ENSG00000156587:57327810-57327989:target
PRPF19	ENSG00000110107	chr11	-	60673835	60674060	60672836	60672924	60671184	60671333	ENSG00000110107:60671184-60671333:source	ENSG00000110107:60673836-60674060:target
ATG2A	ENSG00000110046	chr11	-	64673034	64673127	64671061	64671132	64670760	64670836	ENSG00000110046:64670760-64670836:source	ENSG00000110046:64673035-64673127:target
SNX15	ENSG00000110025	chr11	+	64799903	64800023	64802318	64802434	64802530	64802678	ENSG00000110025:64799903-64800023:source	ENSG00000110025:64802531-64802678:target
DPF2	ENSG00000133884	chr11	+	65101225	65101389	65107855	65108016	65108436	65108544	ENSG00000133884:65101225-65101389:source	ENSG00000133884:65108437-65108544:target
PCNXL3	ENSG00000197136	chr11	+	65396290	65396419	65396827	65396886	65396990	65397206	ENSG00000197136:65396290-65396419:source	ENSG00000197136:65396991-65397206:target
RAB1B	ENSG00000174903	chr11	+	66039628	66039723	66039835	66039931	66043274	66043406	ENSG00000174903:66039628-66039723:source	ENSG00000174903:66043275-66043406:target
DPP3	ENSG00000254986	chr11	+	66259169	66259227	66260186	66260381	66260537	66260650	ENSG00000254986:66259169-66259227:source	ENSG00000254986:66260538-66260650:target
LRP5	ENSG00000162337	chr11	+	68131215	68131411	68133038	68133170	68153783	68154180	ENSG00000162337:68131215-68131411:source	ENSG00000162337:68153784-68154180:target
LRP5	ENSG00000162337	chr11	+	68153784	68154180	68157348	68157520	68170950	68171167	ENSG00000162337:68153784-68154180:source	ENSG00000162337:68170951-68171167:target
LRP5	ENSG00000162337	chr11	+	68197043	68197168	68201069	68201306	68204356	68204467	ENSG00000162337:68197043-68197168:source	ENSG00000162337:68204357-68204467:target
ARAP1	ENSG00000186635	chr11	-	72407593	72407699	72406762	72406910	72406587	72406673	ENSG00000186635:72406587-72406673:source	ENSG00000186635:72407594-72407699:target
FCHSD2	ENSG00000137478	chr11	-	72613587	72613683	72611301	72611373	72600874	72600990	ENSG00000137478:72600874-72600990:source	ENSG00000137478:72613588-72613683:target
C2CD3	ENSG00000168014	chr11	-	73785297	73785645	73768450	73768589	73765652	73765716	ENSG00000168014:73765652-73765716:source	ENSG00000168014:73785298-73785645:target
ARRB1	ENSG00000137486	chr11	-	74979932	74980018	74978695	74978747	74975318	74977318	ENSG00000137486:74975226-74977318:source	ENSG00000137486:74979933-74980018:target
UVRAG	ENSG00000198382	chr11	+	75719851	75719911	75723970	75724146	75727858	75728024	ENSG00000198382:75719851-75719911:source	ENSG00000198382:75727859-75728024:target
ACER3	ENSG00000078124	chr11	+	76687333	76687385	76696686	76696768	76701582	76701618	ENSG00000078124:76687333-76687385:source	ENSG00000078124:76701583-76701618:target
NARS2	ENSG00000137513	chr11	-	78277177	78277318	78270584	78270665	78239888	78239982	ENSG00000137513:78239888-78239982:source	ENSG00000137513:78277178-78277318:target
EED	ENSG00000074266	chr11	+	85961338	85961490	85963189	85963282	85966263	85966329	ENSG00000074266:85961338-85961490:source	ENSG00000074266:85966264-85966329:target
CHORDC1	ENSG00000110172	chr11	-	89939369	89939440	89938627	89938733	89936476	89936595	ENSG00000110172:89936476-89936595:source	ENSG00000110172:89939370-89939440:target
C11orf54	ENSG00000182919	chr11	+	93479651	93480614	93483511	93483610	93486847	93486923	ENSG00000182919:93479651-93480614:source	ENSG00000182919:93486848-93486923:target
MED17	ENSG00000042429	chr11	+	93521167	93521333	93523425	93523509	93523739	93523959	ENSG00000042429:93521167-93521333:source	ENSG00000042429:93523740-93523959:target
MTMR2	ENSG00000087053	chr11	-	95578116	95578323	95574780	95574873	95571258	95571371	ENSG00000087053:95571258-95571371:source	ENSG00000087053:95578117-95578323:target
ARHGAP42	ENSG00000165895	chr11	+	100849718	100849780	100856804	100857083	100858243	100858323	ENSG00000165895:100849718-100849780:source	ENSG00000165895:100858244-100858323:target
BIRC3	ENSG00000023445	chr11	+	102196197	102196296	102197459	102197582	102198782	102198861	ENSG00000023445:102196197-102196296:source	ENSG00000023445:102198783-102198861:target
DCUN1D5	ENSG00000137692	chr11	-	102936997	102937102	102935003	102935106	102932805	102933143	ENSG00000137692:102932805-102933143:source	ENSG00000137692:102936998-102937102:target
AASDHPPT	ENSG00000149313	chr11	+	105950194	105950419	105961283	105961405	105962042	105962204	ENSG00000149313:105950194-105950419:source	ENSG00000149313:105962043-105962204:target
ATM	ENSG00000149311	chr11	+	108139137	108139336	108141790	108141873	108141977	108142133	ENSG00000149311:108139137-108139336:source	ENSG00000149311:108141978-108142133:target
ZPR1	ENSG00000109917	chr11	-	116653634	116653745	116652873	116652960	116650488	116650553	ENSG00000109917:116650488-116650553:source	ENSG00000109917:116653635-116653745:target
RNF214	ENSG00000167257	chr11	+	117153120	117153252	117153461	117153566	117153830	117153926	ENSG00000167257:117153120-117153252:source	ENSG00000167257:117153831-117153926:target
UBE4A	ENSG00000110344	chr11	+	118252106	118252238	118252729	118252913	118253303	118253491	ENSG00000110344:118252106-118252238:source	ENSG00000110344:118253304-118253491:target
KMT2A	ENSG00000118058	chr11	+	118352430	118352807	118353136	118353210	118354897	118355046	ENSG00000118058:118352430-118352807:source	ENSG00000118058:118354898-118355046:target
HYOU1	ENSG00000149428	chr11	-	118922149	118922337	118921746	118921885	118920489	118920549	ENSG00000149428:118920489-118920549:source	ENSG00000149428:118922150-118922337:target
NLRX1	ENSG00000160703	chr11	+	119042065	119042182	119043064	119043134	119043609	119043698	ENSG00000160703:119042065-119042182:source	ENSG00000160703:119043610-119043698:target
CBL	ENSG00000110395	chr11	+	119076752	119077322	119103157	119103405	119142444	119142591	ENSG00000110395:119076752-119077322:source	ENSG00000110395:119142445-119142591:target
CHEK1	ENSG00000149554	chr11	+	125514407	125514538	125523640	125523742	125525119	125525640	ENSG00000149554:125514407-125514538:source	ENSG00000149554:125525120-125525640:target
SRPR	ENSG00000182934	chr11	-	126138582	126138877	126137897	126137981	126137444	126137607	ENSG00000182934:126137444-126137607:source	ENSG00000182934:126138583-126138877:target
PRDM10	ENSG00000170325	chr11	-	129800910	129801153	129799304	129799316	129794777	129795124	ENSG00000170325:129794777-129795124:source	ENSG00000170325:129800911-129801153:target
JAM3	ENSG00000166086	chr11	+	134010552	134010665	134014135	134014288	134014686	134015326	ENSG00000166086:134010552-134010665:source	ENSG00000166086:134014687-134015326:target
NCAPD3	ENSG00000151503	chr11	-	134079206	134079628	134079038	134079100	134078758	134078845	ENSG00000151503:134078758-134078845:source	ENSG00000151503:134079207-134079628:target
EXOC2	ENSG00000112685	chr6	-	632940	633117	631412	631536	629835	629961	ENSG00000112685:629835-629961:source	ENSG00000112685:632941-633117:target
RIPK1	ENSG00000137275	chr6	+	3083319	3083547	3085492	3085642	3089814	3089891	ENSG00000137275:3083319-3083547:source	ENSG00000137275:3089815-3089891:target
PRPF4B	ENSG00000112739	chr6	+	4052954	4053107	4055786	4055910	4056554	4056669	ENSG00000112739:4052954-4053107:source	ENSG00000112739:4056555-4056669:target
NRN1	ENSG00000124785	chr6	-	6002585	6002730	6000599	6000776	5998232	5999437	ENSG00000124785:5998232-5999437:source	ENSG00000124785:6002586-6002730:target
SNRNP48	ENSG00000168566	chr6	+	7593967	7594080	7594331	7594392	7595259	7595334	ENSG00000168566:7593967-7594080:source	ENSG00000168566:7595260-7595334:target
PAK1IP1	ENSG00000111845	chr6	+	10702798	10702872	10703637	10703690	10704739	10704885	ENSG00000111845:10702798-10702872:source	ENSG00000111845:10704740-10704885:target
TMEM14C	ENSG00000111843	chr6	+	10726140	10726241	10728872	10728960	10730847	10731362	ENSG00000111843:10726140-10726241:source	ENSG00000111843:10730848-10731362:target
RANBP9	ENSG00000010017	chr6	-	13644776	13644961	13642710	13642823	13641431	13641539	ENSG00000010017:13641431-13641539:source	ENSG00000010017:13644777-13644961:target
JARID2	ENSG00000008083	chr6	+	15504731	15504823	15505395	15505526	15507366	15507485	ENSG00000008083:15504731-15504823:source	ENSG00000008083:15507367-15507485:target
MBOAT1	ENSG00000172197	chr6	-	20124638	20124831	20118667	20118771	20115519	20115583	ENSG00000172197:20115519-20115583:source	ENSG00000172197:20124639-20124831:target
MBOAT1	ENSG00000172197	chr6	-	20144450	20144546	20131374	20131430	20128930	20128984	ENSG00000172197:20128930-20128984:source	ENSG00000172197:20144451-20144546:target
CDKAL1	ENSG00000145996	chr6	+	20546572	20546754	20548823	20548936	20649523	20649608	ENSG00000145996:20546572-20546754:source	ENSG00000145996:20649524-20649608:target
CDKAL1	ENSG00000145996	chr6	+	20649524	20649608	20673957	20674067	20739749	20739846	ENSG00000145996:20649524-20649608:source	ENSG00000145996:20739750-20739846:target
CDKAL1	ENSG00000145996	chr6	+	20758826	20758874	20772037	20772140	20781375	20781496	ENSG00000145996:20758826-20758874:source	ENSG00000145996:20781376-20781496:target
MRS2	ENSG00000124532	chr6	+	24403153	24403464	24405395	24405469	24408635	24408672	ENSG00000124532:24403153-24403464:source	ENSG00000124532:24408636-24408672:target
ALDH5A1	ENSG00000112294	chr6	+	24495197	24495578	24502750	24502834	24503490	24503661	ENSG00000112294:24495197-24495578:source	ENSG00000112294:24503491-24503661:target
ABT1	ENSG00000146109	chr6	+	26597180	26597451	26598141	26598338	26598492	26600278	ENSG00000146109:26597180-26597451:source	ENSG00000146109:26598493-26600278:target
GABBR1	ENSG00000204681	chr6	-	29588877	29589069	29587644	29587786	29581020	29581262	ENSG00000204681:29581020-29581262:source	ENSG00000204681:29588878-29589069:target
ABCF1	ENSG00000204574	chr6	+	30539153	30539337	30545185	30545232	30545594	30545690	ENSG00000204574:30539153-30539337:source	ENSG00000204574:30545595-30545690:target
VARS2	ENSG00000137411	chr6	+	30892131	30892337	30893050	30893162	30893320	30893496	ENSG00000137411:30892131-30892337:source	ENSG00000137411:30893321-30893496:target
NFKBIL1	ENSG00000204498	chr6	+	31515940	31516216	31524473	31524560	31525404	31525736	ENSG00000204498:31515940-31516216:source	ENSG00000204498:31525405-31525736:target
ABHD16A	ENSG00000204427	chr6	-	31668718	31668805	31664724	31664810	31661136	31661209	ENSG00000204427:31661136-31661209:source	ENSG00000204427:31668719-31668805:target
CLIC1	ENSG00000213719	chr6	-	31701930	31702040	31701612	31701738	31701343	31701449	ENSG00000213719:31701343-31701449:source	ENSG00000213719:31701931-31702040:target
CLIC1	ENSG00000213719	chr6	-	31704038	31704189	31701930	31702040	31701613	31701738	ENSG00000213719:31701613-31701738:source	ENSG00000213719:31704039-31704189:target
NEU1	ENSG00000204386	chr6	-	31829775	31829968	31828964	31829227	31828216	31828398	ENSG00000204386:31828216-31828398:source	ENSG00000204386:31829776-31829968:target
PPT2-EGFL8	ENSG00000258388	chr6	+	32122241	32122554	32122806	32122960	32123464	32123560	ENSG00000258388:32122241-32122554:source	ENSG00000258388:32123465-32123560:target
HLA-DRB1	ENSG00000196126	chr6	-	32549333	32549615	32548522	32548633	32548024	32548047	ENSG00000196126:32548024-32548047:source	ENSG00000196126:32549334-32549615:target
TAP1	ENSG00000168394	chr6	-	32819885	32820016	32818720	32818926	32818097	32818294	ENSG00000168394:32818097-32818294:source	ENSG00000168394:32819886-32820016:target
KIFC1	ENSG00000237649	chr6	+	33371091	33371144	33371261	33371312	33371505	33371906	ENSG00000237649:33371091-33371144:source	ENSG00000237649:33371506-33371906:target
ITPR3	ENSG00000096433	chr6	+	33626447	33626605	33626797	33626896	33627242	33627326	ENSG00000096433:33626447-33626605:source	ENSG00000096433:33627243-33627326:target
SNRPC	ENSG00000124562	chr6	+	34730372	34730480	34735684	34735774	34738067	34738172	ENSG00000124562:34730372-34730480:source	ENSG00000124562:34738068-34738172:target
UHRF1BP1	ENSG00000065060	chr6	+	34825901	34827348	34831778	34831975	34835001	34835156	ENSG00000065060:34825901-34827348:source	ENSG00000065060:34835002-34835156:target
FKBP5	ENSG00000096060	chr6	-	35565024	35565181	35558906	35558997	35552894	35554894	ENSG00000096060:35548334-35554894:source	ENSG00000096060:35565025-35565181:target
SRPK1	ENSG00000096063	chr6	-	35838710	35838767	35838057	35838271	35837366	35837678	ENSG00000096063:35837366-35837678:source	ENSG00000096063:35838711-35838767:target
MTCH1	ENSG00000137409	chr6	-	36944974	36945026	36944273	36944374	36943434	36943493	ENSG00000137409:36943434-36943493:source	ENSG00000137409:36944975-36945026:target
MTCH1	ENSG00000137409	chr6	-	36953628	36954074	36949363	36949448	36946281	36946387	ENSG00000137409:36946281-36946387:source	ENSG00000137409:36953629-36954074:target
TBC1D22B	ENSG00000065491	chr6	+	37247080	37247387	37249960	37250140	37250657	37250728	ENSG00000065491:37247080-37247387:source	ENSG00000065491:37250658-37250728:target
CMTR1	ENSG00000137200	chr6	+	37403400	37403538	37404084	37404158	37411774	37411926	ENSG00000137200:37403400-37403538:source	ENSG00000137200:37411775-37411926:target
GLO1	ENSG00000124767	chr6	-	38650583	38650991	38649787	38649877	38643701	38645159	ENSG00000124767:38643701-38645159:source	ENSG00000124767:38650584-38650991:target
GLO1	ENSG00000124767	chr6	-	38670746	38670917	38654852	38654906	38654668	38654750	ENSG00000124767:38654668-38654750:source	ENSG00000124767:38670747-38670917:target
NFYA	ENSG00000001167	chr6	+	41051785	41051931	41057317	41057449	41057942	41058048	ENSG00000001167:41051785-41051931:source	ENSG00000001167:41057943-41058048:target
USP49	ENSG00000164663	chr6	-	41773365	41773483	41771543	41771748	41767568	41767676	ENSG00000164663:41767568-41767676:source	ENSG00000164663:41773366-41773483:target
UBR2	ENSG00000024048	chr6	+	42647462	42647570	42650792	42650849	42652531	42652609	ENSG00000024048:42647462-42647570:source	ENSG00000024048:42652532-42652609:target
GLTSCR1L	ENSG00000112624	chr6	+	42819830	42819935	42821375	42821476	42823593	42823655	ENSG00000112624:42819830-42819935:source	ENSG00000112624:42823594-42823655:target
KLHDC3	ENSG00000124702	chr6	+	42985257	42985433	42985590	42985706	42985882	42985954	ENSG00000124702:42985257-42985433:source	ENSG00000124702:42985883-42985954:target
KLC4	ENSG00000137171	chr6	+	43039013	43039112	43039304	43039357	43039589	43039660	ENSG00000137171:43039013-43039112:source	ENSG00000137171:43039590-43039660:target
KLC4	ENSG00000137171	chr6	+	43039305	43039357	43039589	43039660	43039884	43039993	ENSG00000137171:43039305-43039357:source	ENSG00000137171:43039885-43039993:target
CUL9	ENSG00000112659	chr6	+	43167667	43167894	43168173	43168264	43168400	43168572	ENSG00000112659:43167667-43167894:source	ENSG00000112659:43168401-43168572:target
XPO5	ENSG00000124571	chr6	-	43514307	43514489	43504178	43504493	43501091	43501744	ENSG00000124571:43501091-43501744:source	ENSG00000124571:43514308-43514489:target
XPO5	ENSG00000124571	chr6	-	43515344	43515418	43515052	43515190	43514308	43514489	ENSG00000124571:43514308-43514489:source	ENSG00000124571:43515345-43515418:target
XPO5	ENSG00000124571	chr6	-	43527914	43528040	43526237	43526328	43523571	43523701	ENSG00000124571:43523571-43523701:source	ENSG00000124571:43527915-43528040:target
POLH	ENSG00000170734	chr6	+	43568725	43568828	43571628	43571748	43572351	43572475	ENSG00000170734:43568725-43568828:source	ENSG00000170734:43572352-43572475:target
MRPS18A	ENSG00000096080	chr6	-	43648825	43648857	43646254	43646362	43643231	43643354	ENSG00000096080:43643231-43643354:source	ENSG00000096080:43648826-43648857:target
TMEM63B	ENSG00000137216	chr6	+	44117961	44118047	44118300	44118366	44119582	44119745	ENSG00000137216:44117961-44118047:source	ENSG00000137216:44119583-44119745:target
TMEM63B	ENSG00000137216	chr6	+	44121413	44121580	44121809	44121925	44122101	44122182	ENSG00000137216:44121413-44121580:source	ENSG00000137216:44122102-44122182:target
AARS2	ENSG00000124608	chr6	-	44269117	44269201	44268892	44269003	44267391	44268448	ENSG00000124608:44267391-44268448:source	ENSG00000124608:44269118-44269201:target
AARS2	ENSG00000124608	chr6	-	44271022	44271160	44270802	44270912	44270539	44270647	ENSG00000124608:44270539-44270647:source	ENSG00000124608:44271023-44271160:target
AARS2	ENSG00000124608	chr6	-	44273389	44273523	44272790	44272935	44272382	44272554	ENSG00000124608:44272382-44272554:source	ENSG00000124608:44273390-44273523:target
SUPT3H	ENSG00000196284	chr6	-	44929489	44929565	44922231	44922344	44921047	44921154	ENSG00000196284:44921047-44921154:source	ENSG00000196284:44929490-44929565:target
MCM3	ENSG00000112118	chr6	-	52149394	52149679	52148091	52148204	52147451	52147659	ENSG00000112118:52147451-52147659:source	ENSG00000112118:52149395-52149679:target
FBXO9	ENSG00000112146	chr6	+	52958683	52958776	52959489	52959639	52960310	52960462	ENSG00000112146:52958683-52958776:source	ENSG00000112146:52960311-52960462:target
PTP4A1	ENSG00000112245	chr6	+	64288803	64288933	64289161	64289236	64289961	64291961	ENSG00000112245:64288803-64288933:source	ENSG00000112245:64289962-64293492:target
MYO6	ENSG00000196586	chr6	+	76576649	76576822	76577147	76577240	76580363	76580402	ENSG00000196586:76576649-76576822:source	ENSG00000196586:76580364-76580402:target
PHIP	ENSG00000146247	chr6	-	79672813	79672969	79671406	79671527	79668192	79668317	ENSG00000146247:79668192-79668317:source	ENSG00000146247:79672814-79672969:target
TTK	ENSG00000112742	chr6	+	80715519	80715699	80715821	80715892	80717525	80717748	ENSG00000112742:80715519-80715699:source	ENSG00000112742:80717526-80717748:target
IBTK	ENSG00000005700	chr6	-	82925792	82925967	82923943	82924546	82922424	82922510	ENSG00000005700:82922424-82922510:source	ENSG00000005700:82925793-82925967:target
DOPEY1	ENSG00000083097	chr6	+	83834424	83834538	83834884	83834914	83835218	83835452	ENSG00000083097:83834424-83834538:source	ENSG00000083097:83835219-83835452:target
DOPEY1	ENSG00000083097	chr6	+	83856955	83857010	83858477	83858582	83861311	83861378	ENSG00000083097:83856955-83857010:source	ENSG00000083097:83861312-83861378:target
CYB5R4	ENSG00000065615	chr6	+	84649775	84649925	84650233	84650320	84665016	84665181	ENSG00000065615:84649775-84649925:source	ENSG00000065615:84665017-84665181:target
RNGTT	ENSG00000111880	chr6	-	89673064	89673348	89650789	89650899	89638883	89638986	ENSG00000111880:89638883-89638986:source	ENSG00000111880:89673065-89673348:target
PM20D2	ENSG00000146281	chr6	+	89868044	89868179	89871123	89871278	89871501	89871609	ENSG00000146281:89868044-89868179:source	ENSG00000146281:89871502-89871609:target
UBE2J1	ENSG00000198833	chr6	-	90048177	90048262	90047923	90048029	90045021	90045150	ENSG00000198833:90045021-90045150:source	ENSG00000198833:90048178-90048262:target
MAP3K7	ENSG00000135341	chr6	-	91281415	91281526	91278276	91278342	91271341	91271386	ENSG00000135341:91271341-91271386:source	ENSG00000135341:91281416-91281526:target
UFL1	ENSG00000014123	chr6	+	96972258	96972286	96973172	96973270	96974196	96974311	ENSG00000014123:96972258-96972286:source	ENSG00000014123:96974197-96974311:target
PREP	ENSG00000085377	chr6	-	105800846	105800952	105781188	105781380	105776704	105776901	ENSG00000085377:105776704-105776901:source	ENSG00000085377:105800847-105800952:target
FIG4	ENSG00000112367	chr6	+	110064878	110064975	110081452	110081586	110083293	110083410	ENSG00000112367:110064878-110064975:source	ENSG00000112367:110083294-110083410:target
CDC40	ENSG00000168438	chr6	+	110501587	110501836	110502432	110502640	110514384	110514471	ENSG00000168438:110501587-110501836:source	ENSG00000168438:110514385-110514471:target
CDC40	ENSG00000168438	chr6	+	110531910	110532006	110532985	110533062	110533335	110533475	ENSG00000168438:110531910-110532006:source	ENSG00000168438:110533336-110533475:target
REV3L	ENSG00000009413	chr6	-	111631055	111631302	111629216	111629448	111628564	111628773	ENSG00000009413:111628564-111628773:source	ENSG00000009413:111631056-111631302:target
NT5DC1	ENSG00000178425	chr6	+	116558129	116558247	116558621	116558802	116559349	116559511	ENSG00000178425:116558129-116558247:source	ENSG00000178425:116559350-116559511:target
ZUFSP	ENSG00000153975	chr6	-	116979965	116980087	116977846	116978015	116973167	116973355	ENSG00000153975:116973167-116973355:source	ENSG00000153975:116979966-116980087:target
DCBLD1	ENSG00000164465	chr6	+	117842688	117842739	117846524	117846597	117853422	117853556	ENSG00000164465:117842688-117842739:source	ENSG00000164465:117853423-117853556:target
CEP85L	ENSG00000111860	chr6	-	118801033	118801084	118794260	118794380	118791700	118791807	ENSG00000111860:118791700-118791807:source	ENSG00000111860:118801034-118801084:target
MAN1A1	ENSG00000111885	chr6	-	119669627	119670452	119653100	119653169	119628061	119628157	ENSG00000111885:119628061-119628157:source	ENSG00000111885:119669628-119670452:target
TBC1D32	ENSG00000146350	chr6	-	121452772	121452898	121451014	121451070	121447524	121447607	ENSG00000146350:121447524-121447607:source	ENSG00000146350:121452773-121452898:target
HSF2	ENSG00000025156	chr6	+	122734670	122734794	122737365	122737441	122740312	122740374	ENSG00000025156:122734670-122734794:source	ENSG00000025156:122740313-122740374:target
MED23	ENSG00000112282	chr6	-	131931185	131931404	131929067	131929211	131927619	131927764	ENSG00000112282:131927619-131927764:source	ENSG00000112282:131931186-131931404:target
SLC18B1	ENSG00000146409	chr6	-	133100406	133100543	133097466	133097568	133095361	133095452	ENSG00000146409:133095361-133095452:source	ENSG00000146409:133100407-133100543:target
MYB	ENSG00000118513	chr6	+	135510929	135511021	135511264	135511485	135513461	135513696	ENSG00000118513:135510929-135511021:source	ENSG00000118513:135513462-135513696:target
MYB	ENSG00000118513	chr6	+	135520046	135520188	135520663	135520719	135521222	135521337	ENSG00000118513:135520046-135520188:source	ENSG00000118513:135521223-135521337:target
PEX7	ENSG00000112357	chr6	+	137191028	137191141	137191869	137191977	137193335	137193391	ENSG00000112357:137191028-137191141:source	ENSG00000112357:137193336-137193391:target
REPS1	ENSG00000135597	chr6	-	139308666	139309398	139272178	139272297	139268927	139269050	ENSG00000135597:139268927-139269050:source	ENSG00000135597:139308667-139309398:target
VTA1	ENSG00000009844	chr6	+	142468367	142468536	142487364	142487459	142490686	142490814	ENSG00000009844:142468367-142468536:source	ENSG00000009844:142490687-142490814:target
PEX3	ENSG00000034693	chr6	+	143771944	143772252	143780221	143780353	143784052	143784134	ENSG00000034693:143771944-143772252:source	ENSG00000034693:143784053-143784134:target
LTV1	ENSG00000135521	chr6	+	144167188	144167361	144171267	144171355	144178439	144178720	ENSG00000135521:144167188-144167361:source	ENSG00000135521:144178440-144178720:target
UTRN	ENSG00000152818	chr6	+	144835786	144835956	144837364	144837523	144837946	144838084	ENSG00000152818:144835786-144835956:source	ENSG00000152818:144837947-144838084:target
STXBP5	ENSG00000164506	chr6	+	147583426	147583489	147586249	147586344	147588219	147588303	ENSG00000164506:147583426-147583489:source	ENSG00000164506:147588220-147588303:target
STXBP5	ENSG00000164506	chr6	+	147648261	147648412	147649834	147649918	147655292	147655358	ENSG00000164506:147648261-147648412:source	ENSG00000164506:147655293-147655358:target
RMND1	ENSG00000155906	chr6	-	151742379	151742456	151739667	151739714	151738414	151738534	ENSG00000155906:151738414-151738534:source	ENSG00000155906:151742380-151742456:target
RMND1	ENSG00000155906	chr6	-	151751272	151751312	151748616	151748717	151744660	151744766	ENSG00000155906:151744660-151744766:source	ENSG00000155906:151751273-151751312:target
FBXO5	ENSG00000112029	chr6	-	153294180	153295120	153293406	153293589	153291664	153292549	ENSG00000112029:153291664-153292549:source	ENSG00000112029:153294181-153295120:target
TAGAP	ENSG00000164691	chr6	-	159464620	159464687	159463109	159463276	159462386	159462547	ENSG00000164691:159462386-159462547:source	ENSG00000164691:159464621-159464687:target
IGF2R	ENSG00000197081	chr6	+	160477456	160477557	160478779	160478830	160479054	160479156	ENSG00000197081:160477456-160477557:source	ENSG00000197081:160479055-160479156:target
TSR1	ENSG00000167721	chr17	-	2233808	2233919	2232636	2232769	2228598	2228714	ENSG00000167721:2228598-2228714:source	ENSG00000167721:2233809-2233919:target
METTL16	ENSG00000127804	chr17	-	2341402	2341492	2339967	2340134	2324025	2324198	ENSG00000127804:2324025-2324198:source	ENSG00000127804:2341403-2341492:target
CYB5D2	ENSG00000167740	chr17	+	4053185	4053325	4054237	4054316	4057967	4058154	ENSG00000167740:4053185-4053325:source	ENSG00000167740:4057968-4058154:target
MINK1	ENSG00000141503	chr17	+	4736683	4736935	4762507	4762623	4781611	4781677	ENSG00000141503:4736683-4736935:source	ENSG00000141503:4781612-4781677:target
CAMTA2	ENSG00000108509	chr17	-	4876063	4876088	4875526	4875831	4873635	4873831	ENSG00000108509:4873635-4873831:source	ENSG00000108509:4876064-4876088:target
RABEP1	ENSG00000029725	chr17	+	5257654	5257785	5259802	5259868	5264502	5264970	ENSG00000029725:5257654-5257785:source	ENSG00000029725:5264503-5264970:target
DHX33	ENSG00000005100	chr17	-	5353522	5353726	5352128	5352215	5345833	5347833	ENSG00000005100:5344232-5347833:source	ENSG00000005100:5353523-5353726:target
POLR2A	ENSG00000181222	chr17	+	7399260	7399392	7399528	7399665	7399758	7399932	ENSG00000181222:7399260-7399392:source	ENSG00000181222:7399759-7399932:target
KDM6B	ENSG00000132510	chr17	+	7749897	7750058	7750136	7750334	7750422	7750770	ENSG00000132510:7749897-7750058:source	ENSG00000132510:7750423-7750770:target
MYH10	ENSG00000133026	chr17	-	8508143	8508300	8492398	8492426	8480554	8480656	ENSG00000133026:8480554-8480656:source	ENSG00000133026:8508144-8508300:target
MPRIP	ENSG00000133030	chr17	+	17045941	17046079	17046869	17046983	17049349	17049406	ENSG00000133030:17045941-17046079:source	ENSG00000133030:17049350-17049406:target
DRG2	ENSG00000108591	chr17	+	17991200	17991401	17995231	17995388	17997126	17997594	ENSG00000108591:17991200-17991401:source	ENSG00000108591:17997127-17997594:target
MAPK7	ENSG00000166484	chr17	+	19282062	19282445	19282905	19282918	19283094	19283479	ENSG00000166484:19282062-19282445:source	ENSG00000166484:19283095-19283479:target
ALDH3A2	ENSG00000072210	chr17	+	19552239	19552437	19554859	19555091	19555859	19556010	ENSG00000072210:19552239-19552437:source	ENSG00000072210:19555860-19556010:target
TAOK1	ENSG00000160551	chr17	+	27861136	27861318	27862596	27862776	27869578	27871578	ENSG00000160551:27861136-27861318:source	ENSG00000160551:27869579-27878922:target
SSH2	ENSG00000141298	chr17	-	28029976	28030080	28022476	28022541	28011581	28011702	ENSG00000141298:28011581-28011702:source	ENSG00000141298:28029977-28030080:target
UTP6	ENSG00000108651	chr17	-	30226664	30226749	30226190	30226311	30221989	30222030	ENSG00000108651:30221989-30222030:source	ENSG00000108651:30226665-30226749:target
MYO1D	ENSG00000176658	chr17	-	31075953	31076024	31072539	31072707	31072229	31072303	ENSG00000176658:31072229-31072303:source	ENSG00000176658:31075954-31076024:target
RFFL	ENSG00000092871	chr17	-	33348389	33348430	33344541	33344625	33343389	33343599	ENSG00000092871:33343389-33343599:source	ENSG00000092871:33348390-33348430:target
AP2B1	ENSG00000006125	chr17	+	33977549	33977808	33977932	33978024	33984617	33984810	ENSG00000006125:33977549-33977808:source	ENSG00000006125:33984618-33984810:target
AP2B1	ENSG00000006125	chr17	+	34044214	34044368	34046872	34047016	34050643	34052643	ENSG00000006125:34044214-34044368:source	ENSG00000006125:34050644-34053436:target
ENSG00000172660	ENSG00000172660	chr17	+	34161269	34161602	34161769	34161892	34163135	34163245	ENSG00000172660:34161269-34161602:source	ENSG00000172660:34163136-34163245:target
ENSG00000108264	ENSG00000108264	chr17	+	35827558	35827629	35828655	35828748	35830503	35830636	ENSG00000108264:35827558-35827629:source	ENSG00000108264:35830504-35830636:target
ENSG00000006114	ENSG00000006114	chr17	-	35921296	35921359	35917241	35917305	35913217	35914161	ENSG00000006114:35913217-35914161:source	ENSG00000006114:35921297-35921359:target
ENSG00000141141	ENSG00000141141	chr17	-	35981171	35981322	35980917	35980993	35979813	35979884	ENSG00000141141:35979813-35979884:source	ENSG00000141141:35981172-35981322:target
ENSG00000174111	ENSG00000174111	chr17	+	36523765	36523933	36531665	36531788	36533539	36533668	ENSG00000174111:36523765-36523933:source	ENSG00000174111:36533540-36533668:target
ENSG00000225485	ENSG00000225485	chr17	+	36642303	36642381	36645998	36646158	36646342	36646416	ENSG00000225485:36642303-36642381:source	ENSG00000225485:36646343-36646416:target
ENSG00000056661	ENSG00000056661	chr17	-	36894605	36894704	36893259	36893360	36892343	36892423	ENSG00000056661:36892343-36892423:source	ENSG00000056661:36894606-36894704:target
MED1	ENSG00000125686	chr17	-	37579579	37579698	37575969	37576171	37571497	37571592	ENSG00000125686:37571497-37571592:source	ENSG00000125686:37579580-37579698:target
MED1	ENSG00000125686	chr17	-	37580879	37580991	37579949	37580074	37579580	37579698	ENSG00000125686:37579580-37579698:source	ENSG00000125686:37580880-37580991:target
MED1	ENSG00000125686	chr17	-	37595417	37595446	37590501	37590573	37588195	37588269	ENSG00000125686:37588195-37588269:source	ENSG00000125686:37595418-37595446:target
MED1	ENSG00000125686	chr17	-	37596875	37597211	37596638	37596771	37595418	37595446	ENSG00000125686:37595418-37595446:source	ENSG00000125686:37596876-37597211:target
CDK12	ENSG00000167258	chr17	+	37627132	37628016	37646809	37646986	37649003	37649143	ENSG00000167258:37627132-37628016:source	ENSG00000167258:37649004-37649143:target
CDK12	ENSG00000167258	chr17	+	37667782	37667883	37671983	37672061	37673692	37673809	ENSG00000167258:37667782-37667883:source	ENSG00000167258:37673693-37673809:target
PSMD3	ENSG00000108344	chr17	+	38152436	38152591	38152953	38153046	38153582	38153633	ENSG00000108344:38152436-38152591:source	ENSG00000108344:38153583-38153633:target
TOP2A	ENSG00000131747	chr17	-	38564743	38564882	38564218	38564376	38563801	38563926	ENSG00000131747:38563801-38563926:source	ENSG00000131747:38564744-38564882:target
ACLY	ENSG00000131473	chr17	-	40025726	40025840	40025295	40025378	40024962	40025038	ENSG00000131473:40024962-40025038:source	ENSG00000131473:40025727-40025840:target
TUBG1	ENSG00000131462	chr17	+	40761694	40761804	40762125	40762238	40762440	40763285	ENSG00000131462:40761694-40761804:source	ENSG00000131462:40762441-40763285:target
BRCA1	ENSG00000012048	chr17	-	41203079	41203134	41201137	41201211	41199660	41199720	ENSG00000012048:41199660-41199720:source	ENSG00000012048:41203080-41203134:target
UBTF	ENSG00000108312	chr17	-	42293896	42294072	42293273	42293357	42292722	42293177	ENSG00000108312:42292722-42293177:source	ENSG00000108312:42293897-42294072:target
NMT1	ENSG00000136448	chr17	+	43173562	43173653	43174495	43174612	43175749	43176211	ENSG00000136448:43173562-43173653:source	ENSG00000136448:43175750-43176211:target
MAPT	ENSG00000186868	chr17	+	44068826	44068952	44071289	44071343	44073764	44074030	ENSG00000186868:44068826-44068952:source	ENSG00000186868:44073765-44074030:target
KANSL1	ENSG00000120071	chr17	-	44171925	44172067	44159806	44159908	44144915	44145033	ENSG00000120071:44144915-44145033:source	ENSG00000120071:44171926-44172067:target
NSF	ENSG00000073969	chr17	+	44806221	44806300	44819792	44819880	44827138	44827273	ENSG00000073969:44806221-44806300:source	ENSG00000073969:44827139-44827273:target
GOSR2	ENSG00000108433	chr17	+	45000483	45000587	45000874	45000998	45006885	45007284	ENSG00000108433:45000483-45000587:source	ENSG00000108433:45006886-45007284:target
FAM117A	ENSG00000121104	chr17	-	47797121	47797256	47795329	47795406	47794875	47795076	ENSG00000121104:47794875-47795076:source	ENSG00000121104:47797122-47797256:target
PPP1R9B	ENSG00000108819	chr17	-	48220962	48221083	48219475	48219561	48218634	48218738	ENSG00000108819:48218634-48218738:source	ENSG00000108819:48220963-48221083:target
RSAD1	ENSG00000136444	chr17	+	48559452	48559817	48560003	48560067	48560700	48560896	ENSG00000136444:48559452-48559817:source	ENSG00000136444:48560701-48560896:target
SPAG9	ENSG00000008294	chr17	-	49077021	49077078	49076836	49076848	49075774	49075978	ENSG00000008294:49075774-49075978:source	ENSG00000008294:49077022-49077078:target
NME2	ENSG00000011052	chr17	+	49245603	49245704	49247297	49247410	49248847	49249105	ENSG00000011052:49245603-49245704:source	ENSG00000011052:49248848-49249105:target
UTP18	ENSG00000011260	chr17	+	49343543	49343641	49345570	49345689	49346197	49346265	ENSG00000011260:49343543-49343641:source	ENSG00000011260:49346198-49346265:target
COX11	ENSG00000166260	chr17	-	53045641	53046146	53042937	53043020	53042058	53042213	ENSG00000166260:53042058-53042213:source	ENSG00000166260:53045642-53046146:target
MSI2	ENSG00000153944	chr17	+	55334374	55334499	55334826	55334908	55335630	55335715	ENSG00000153944:55334374-55334499:source	ENSG00000153944:55335631-55335715:target
MKS1	ENSG00000011143	chr17	-	56296511	56296666	56295980	56296090	56294027	56294097	ENSG00000011143:56294027-56294097:source	ENSG00000011143:56296512-56296666:target
MTMR4	ENSG00000108389	chr17	-	56581663	56581849	56581410	56581581	56581105	56581259	ENSG00000108389:56581105-56581259:source	ENSG00000108389:56581664-56581849:target
MTMR4	ENSG00000108389	chr17	-	56584103	56584232	56582832	56582944	56582140	56582335	ENSG00000108389:56582140-56582335:source	ENSG00000108389:56584104-56584232:target
DHX40	ENSG00000108406	chr17	+	57654627	57654726	57656832	57656919	57657057	57657240	ENSG00000108406:57654627-57654726:source	ENSG00000108406:57657058-57657240:target
CLTC	ENSG00000141367	chr17	+	57743464	57743601	57743840	57744005	57744157	57744427	ENSG00000141367:57743464-57743601:source	ENSG00000141367:57744158-57744427:target
RPS6KB1	ENSG00000108443	chr17	+	58012554	58012661	58013575	58013638	58013824	58013902	ENSG00000108443:58012554-58012661:source	ENSG00000108443:58013825-58013902:target
RPS6KB1	ENSG00000108443	chr17	+	58013825	58013902	58014938	58015135	58018196	58018304	ENSG00000108443:58013825-58013902:source	ENSG00000108443:58018197-58018304:target
USP32	ENSG00000170832	chr17	-	58258684	58259109	58257905	58257998	58256455	58256789	ENSG00000170832:58256455-58256789:source	ENSG00000170832:58258685-58259109:target
USP32	ENSG00000170832	chr17	-	58303399	58303510	58300771	58300947	58299770	58299910	ENSG00000170832:58299770-58299910:source	ENSG00000170832:58303400-58303510:target
APPBP2	ENSG00000062725	chr17	-	58533656	58533742	58532666	58532765	58531663	58531853	ENSG00000062725:58531663-58531853:source	ENSG00000062725:58533657-58533742:target
PPM1D	ENSG00000170836	chr17	+	58733960	58734202	58734292	58734403	58740355	58741849	ENSG00000170836:58733960-58734202:source	ENSG00000170836:58740356-58741849:target
BRIP1	ENSG00000136492	chr17	-	59861630	59861785	59861179	59861268	59858188	59858366	ENSG00000136492:59858188-59858366:source	ENSG00000136492:59861631-59861785:target
INTS2	ENSG00000108506	chr17	-	59996760	59996874	59989858	59989955	59989301	59989431	ENSG00000108506:59989301-59989431:source	ENSG00000108506:59996761-59996874:target
TLK2	ENSG00000146872	chr17	+	60650208	60650728	60651705	60651771	60654069	60654136	ENSG00000146872:60650208-60650728:source	ENSG00000146872:60654070-60654136:target
TLK2	ENSG00000146872	chr17	+	60673946	60674035	60674580	60674619	60678011	60678181	ENSG00000146872:60673946-60674035:source	ENSG00000146872:60678012-60678181:target
TACO1	ENSG00000136463	chr17	+	61681894	61682000	61683672	61683800	61684646	61684824	ENSG00000136463:61681894-61682000:source	ENSG00000136463:61684647-61684824:target
CCDC47	ENSG00000108588	chr17	-	61833599	61833710	61831792	61831878	61830101	61830159	ENSG00000108588:61830101-61830159:source	ENSG00000108588:61833600-61833710:target
SMURF2	ENSG00000108854	chr17	-	62587201	62587267	62582203	62582288	62579579	62579662	ENSG00000108854:62579579-62579662:source	ENSG00000108854:62587202-62587267:target
HELZ	ENSG00000198265	chr17	-	65120078	65120130	65119085	65119276	65116521	65116728	ENSG00000198265:65116521-65116728:source	ENSG00000198265:65120079-65120130:target
NOL11	ENSG00000130935	chr17	+	65716022	65716078	65716462	65716560	65717493	65717556	ENSG00000130935:65716022-65716078:source	ENSG00000130935:65717494-65717556:target
BPTF	ENSG00000171634	chr17	+	65918956	65919106	65920662	65920705	65924470	65924717	ENSG00000171634:65918956-65919106:source	ENSG00000171634:65924471-65924717:target
PRKAR1A	ENSG00000108946	chr17	+	66523725	66524041	66524771	66524860	66525010	66525133	ENSG00000108946:66523725-66524041:source	ENSG00000108946:66525011-66525133:target
SUMO2	ENSG00000188612	chr17	-	73177151	73177283	73170846	73170918	73163408	73164496	ENSG00000188612:73163408-73164496:source	ENSG00000188612:73177152-73177283:target
GRB2	ENSG00000177885	chr17	-	73328780	73328878	73321978	73322101	73317876	73317908	ENSG00000177885:73317876-73317908:source	ENSG00000177885:73328781-73328878:target
PRPSAP1	ENSG00000161542	chr17	-	74344609	74344662	74340751	74340818	74328344	74328516	ENSG00000161542:74328344-74328516:source	ENSG00000161542:74344610-74344662:target
RPTOR	ENSG00000141564	chr17	+	78854215	78854289	78857218	78857284	78857580	78857772	ENSG00000141564:78854215-78854289:source	ENSG00000141564:78857581-78857772:target
ALYREF	ENSG00000183684	chr17	-	79848564	79848881	79847658	79847845	79847058	79847205	ENSG00000183684:79847058-79847205:source	ENSG00000183684:79848565-79848881:target
FASN	ENSG00000169710	chr17	-	80048250	80048440	80047507	80047602	80047126	80047260	ENSG00000169710:80047126-80047260:source	ENSG00000169710:80048251-80048440:target
FOXK2	ENSG00000141568	chr17	+	80544006	80544076	80544501	80544753	80544938	80545438	ENSG00000141568:80544006-80544076:source	ENSG00000141568:80544939-80545438:target
B3GNTL1	ENSG00000175711	chr17	-	81006346	81006446	80992910	80992975	80972330	80972395	ENSG00000175711:80972330-80972395:source	ENSG00000175711:81006347-81006446:target
USP25	ENSG00000155313	chr21	+	17197285	17197380	17198522	17198684	17199295	17199522	ENSG00000155313:17197285-17197380:source	ENSG00000155313:17199296-17199522:target
MRPL39	ENSG00000154719	chr21	-	26961146	26961194	26960012	26960101	26957968	26958066	ENSG00000154719:26957968-26958066:source	ENSG00000154719:26961147-26961194:target
GABPA	ENSG00000154727	chr21	+	27107695	27107889	27113883	27113986	27117520	27117665	ENSG00000154727:27107695-27107889:source	ENSG00000154727:27117521-27117665:target
CCT8	ENSG00000156261	chr21	-	30442567	30442658	30441743	30441823	30439877	30440026	ENSG00000156261:30439877-30440026:source	ENSG00000156261:30442568-30442658:target
TIAM1	ENSG00000156299	chr21	-	32582360	32582531	32575223	32575328	32567540	32567621	ENSG00000156299:32567540-32567621:source	ENSG00000156299:32582361-32582531:target
SCAF4	ENSG00000156304	chr21	-	33078586	33078670	33077735	33077780	33076078	33076239	ENSG00000156304:33076078-33076239:source	ENSG00000156304:33078587-33078670:target
SYNJ1	ENSG00000159082	chr21	-	34050954	34051120	34048641	34048665	34045650	34045841	ENSG00000159082:34045650-34045841:source	ENSG00000159082:34050955-34051120:target
ITSN1	ENSG00000205726	chr21	+	35127602	35127702	35129091	35129378	35134226	35134290	ENSG00000205726:35127602-35127702:source	ENSG00000205726:35134227-35134290:target
CHAF1B	ENSG00000159259	chr21	+	37758358	37758560	37759895	37760028	37763848	37763966	ENSG00000159259:37758358-37758560:source	ENSG00000159259:37763849-37763966:target
TTC3	ENSG00000182670	chr21	+	38458090	38459701	38460132	38460175	38460495	38460646	ENSG00000182670:38458090-38459701:source	ENSG00000182670:38460496-38460646:target
TTC3	ENSG00000182670	chr21	+	38519781	38519903	38520845	38520947	38522377	38522470	ENSG00000182670:38519781-38519903:source	ENSG00000182670:38522378-38522470:target
DSCR3	ENSG00000157538	chr21	-	38599954	38600093	38598422	38598486	38595927	38597927	ENSG00000157538:38595721-38597927:source	ENSG00000157538:38599955-38600093:target
PRDM15	ENSG00000141956	chr21	-	43279700	43279794	43279139	43279337	43277285	43277438	ENSG00000141956:43277285-43277438:source	ENSG00000141956:43279701-43279794:target
PWP2	ENSG00000241945	chr21	+	45534457	45534649	45535144	45535280	45535571	45535801	ENSG00000241945:45534457-45534649:source	ENSG00000241945:45535572-45535801:target
ITFG3	ENSG00000167930	chr16	+	313699	313774	314014	314170	314612	314715	ENSG00000167930:313699-313774:source	ENSG00000167930:314613-314715:target
DECR2	ENSG00000242612	chr16	+	454956	455024	455512	455665	456345	456397	ENSG00000242612:454956-455024:source	ENSG00000242612:456346-456397:target
HN1L	ENSG00000206053	chr16	+	1735382	1735588	1741843	1741986	1747812	1747861	ENSG00000206053:1735382-1735588:source	ENSG00000206053:1747813-1747861:target
TSC2	ENSG00000103197	chr16	+	2097466	2098066	2098587	2098754	2100400	2100487	ENSG00000103197:2097466-2098066:source	ENSG00000103197:2100401-2100487:target
TRAF7	ENSG00000131653	chr16	+	2223922	2224049	2224251	2224334	2225111	2225220	ENSG00000131653:2223922-2224049:source	ENSG00000131653:2225112-2225220:target
KCTD5	ENSG00000167977	chr16	+	2752354	2752479	2755135	2755194	2757298	2759031	ENSG00000167977:2752354-2752479:source	ENSG00000167977:2757299-2759031:target
CLUAP1	ENSG00000103351	chr16	+	3554720	3554831	3556330	3556415	3558288	3558468	ENSG00000103351:3554720-3554831:source	ENSG00000103351:3558289-3558468:target
ATF7IP2	ENSG00000166669	chr16	+	10567336	10567391	10567779	10567846	10574735	10574821	ENSG00000166669:10567336-10567391:source	ENSG00000166669:10574736-10574821:target
NUBP1	ENSG00000103274	chr16	+	10841000	10841133	10846466	10846535	10849577	10849610	ENSG00000103274:10841000-10841133:source	ENSG00000103274:10849578-10849610:target
ERCC4	ENSG00000175595	chr16	+	14031621	14031715	14037830	14037952	14038579	14038692	ENSG00000175595:14031621-14031715:source	ENSG00000175595:14038580-14038692:target
RRN3	ENSG00000085721	chr16	-	15177369	15177607	15173854	15173953	15170292	15170507	ENSG00000085721:15170292-15170507:source	ENSG00000085721:15177370-15177607:target
RRN3	ENSG00000085721	chr16	-	15188001	15188174	15186365	15186471	15185172	15185228	ENSG00000085721:15185172-15185228:source	ENSG00000085721:15188002-15188174:target
KIAA0430	ENSG00000166783	chr16	-	15698024	15698255	15696356	15696599	15695848	15696060	ENSG00000166783:15695848-15696060:source	ENSG00000166783:15698025-15698255:target
ABCC1	ENSG00000103222	chr16	+	16110353	16110478	16126965	16127027	16130328	16130460	ENSG00000103222:16110353-16110478:source	ENSG00000103222:16130329-16130460:target
ABCC1	ENSG00000103222	chr16	+	16230335	16230501	16232220	16232415	16235029	16236931	ENSG00000103222:16230335-16230501:source	ENSG00000103222:16235030-16236931:target
SMG1	ENSG00000157106	chr16	-	18844261	18844488	18841540	18841691	18841248	18841437	ENSG00000157106:18841248-18841437:source	ENSG00000157106:18844262-18844488:target
KNOP1	ENSG00000103550	chr16	-	19725439	19725899	19722693	19722762	19721582	19721908	ENSG00000103550:19721582-19721908:source	ENSG00000103550:19725440-19725899:target
IQCK	ENSG00000174628	chr16	+	19729017	19729809	19741751	19741816	19745019	19745355	ENSG00000174628:19729017-19729809:source	ENSG00000174628:19745020-19745355:target
COG7	ENSG00000168434	chr16	-	23453797	23453966	23449753	23449871	23445957	23446039	ENSG00000168434:23445957-23446039:source	ENSG00000168434:23453798-23453966:target
ARHGAP17	ENSG00000140750	chr16	-	24988535	24988777	24983916	24983954	24981828	24981901	ENSG00000140750:24981828-24981901:source	ENSG00000140750:24988536-24988777:target
GTF3C1	ENSG00000077235	chr16	-	27494364	27494446	27493831	27493906	27492037	27492512	ENSG00000077235:27492037-27492512:source	ENSG00000077235:27494365-27494446:target
GTF3C1	ENSG00000077235	chr16	-	27509950	27510054	27508957	27509142	27506532	27506813	ENSG00000077235:27506532-27506813:source	ENSG00000077235:27509951-27510054:target
XPO6	ENSG00000169180	chr16	-	28143654	28143684	28137938	28138081	28137010	28137169	ENSG00000169180:28137010-28137169:source	ENSG00000169180:28143655-28143684:target
CCDC101	ENSG00000176476	chr16	+	28596969	28597041	28599930	28600012	28600420	28600741	ENSG00000176476:28596969-28597041:source	ENSG00000176476:28600421-28600741:target
ASPHD1	ENSG00000174939	chr16	+	29912179	29913241	29915824	29915910	29916172	29916286	ENSG00000174939:29912179-29913241:source	ENSG00000174939:29916173-29916286:target
DOC2A	ENSG00000149927	chr16	-	30017916	30017998	30017733	30017830	30016830	30017652	ENSG00000149927:30016830-30017652:source	ENSG00000149927:30017917-30017998:target
FBXL19	ENSG00000099364	chr16	+	30938894	30938980	30939065	30939284	30939787	30939951	ENSG00000099364:30938894-30938980:source	ENSG00000099364:30939788-30939951:target
SETD1A	ENSG00000099381	chr16	+	30972588	30972858	30974753	30974875	30975414	30975644	ENSG00000099381:30972588-30972858:source	ENSG00000099381:30975415-30975644:target
C16orf58	ENSG00000140688	chr16	-	31519394	31519475	31519084	31519199	31512007	31512052	ENSG00000140688:31512007-31512052:source	ENSG00000140688:31519395-31519475:target
VPS35	ENSG00000069329	chr16	-	46708475	46708572	46708225	46708374	46706177	46706384	ENSG00000069329:46706177-46706384:source	ENSG00000069329:46708476-46708572:target
DNAJA2	ENSG00000069345	chr16	-	47001995	47002076	47001424	47001558	46998523	46998719	ENSG00000069345:46998523-46998719:source	ENSG00000069345:47001996-47002076:target
LONP2	ENSG00000102910	chr16	+	48368127	48368269	48370303	48370409	48381417	48381625	ENSG00000102910:48368127-48368269:source	ENSG00000102910:48381418-48381625:target
PAPD5	ENSG00000121274	chr16	+	50251467	50251574	50256216	50256345	50257084	50257311	ENSG00000121274:50251467-50251574:source	ENSG00000121274:50257085-50257311:target
FTO	ENSG00000140718	chr16	+	53737875	53738141	53798073	53798192	53844051	53844129	ENSG00000140718:53737875-53738141:source	ENSG00000140718:53844052-53844129:target
NLRC5	ENSG00000140853	chr16	+	57068080	57068163	57068423	57068858	57070011	57070095	ENSG00000140853:57068080-57068163:source	ENSG00000140853:57070012-57070095:target
NLRC5	ENSG00000140853	chr16	+	57079209	57079404	57080463	57080553	57081456	57081540	ENSG00000140853:57079209-57079404:source	ENSG00000140853:57081457-57081540:target
CNOT1	ENSG00000125107	chr16	-	58557273	58557406	58555731	58555847	58555087	58555221	ENSG00000125107:58555087-58555221:source	ENSG00000125107:58557274-58557406:target
CNOT1	ENSG00000125107	chr16	-	58583622	58583802	58581469	58581586	58581090	58581200	ENSG00000125107:58581090-58581200:source	ENSG00000125107:58583623-58583802:target
GOT2	ENSG00000125166	chr16	-	58768043	58768261	58757649	58757806	58755549	58756182	ENSG00000125166:58755549-58756182:source	ENSG00000125166:58768044-58768261:target
PLEKHG4	ENSG00000196155	chr16	+	67316645	67316761	67318177	67318360	67318615	67319118	ENSG00000196155:67316645-67316761:source	ENSG00000196155:67318616-67319118:target
CTCF	ENSG00000102974	chr16	+	67663301	67663436	67669417	67669535	67670592	67670754	ENSG00000102974:67663301-67663436:source	ENSG00000102974:67670593-67670754:target
RANBP10	ENSG00000141084	chr16	-	67840204	67840555	67839330	67839442	67805937	67805989	ENSG00000141084:67805937-67805989:source	ENSG00000141084:67840205-67840555:target
CIRH1A	ENSG00000141076	chr16	+	69194259	69194365	69196985	69197081	69199243	69199429	ENSG00000141076:69194259-69194365:source	ENSG00000141076:69199244-69199429:target
NFAT5	ENSG00000102908	chr16	+	69689512	69689702	69693629	69693802	69703879	69704014	ENSG00000102908:69689512-69689702:source	ENSG00000102908:69703880-69704014:target
PDXDC2P	ENSG00000255185	chr16	-	70099658	70099848	70098573	70098679	70076833	70076906	ENSG00000255185:70076833-70076906:source	ENSG00000255185:70099659-70099848:target
PDPR	ENSG00000090857	chr16	+	70170097	70170289	70172801	70172926	70176136	70176292	ENSG00000090857:70170097-70170289:source	ENSG00000090857:70176137-70176292:target
AARS	ENSG00000090861	chr16	-	70305683	70305875	70304098	70304243	70303521	70303666	ENSG00000090861:70303521-70303666:source	ENSG00000090861:70305684-70305875:target
COG4	ENSG00000103051	chr16	-	70530168	70530334	70524232	70524295	70517756	70517872	ENSG00000103051:70517756-70517872:source	ENSG00000103051:70530169-70530334:target
TXNL4B	ENSG00000140830	chr16	-	72124516	72124685	72123987	72124076	72122886	72123037	ENSG00000140830:72122886-72123037:source	ENSG00000140830:72124517-72124685:target
GLG1	ENSG00000090863	chr16	-	74503882	74503971	74502843	74502961	74501654	74501746	ENSG00000090863:74501654-74501746:source	ENSG00000090863:74503883-74503971:target
CFDP1	ENSG00000153774	chr16	-	75338921	75339336	75335654	75335803	75327596	75327940	ENSG00000153774:75327596-75327940:source	ENSG00000153774:75338922-75339336:target
SLC7A5	ENSG00000103257	chr16	-	87874655	87874761	87874337	87874431	87874035	87874079	ENSG00000103257:87874035-87874079:source	ENSG00000103257:87874656-87874761:target
ZC3H18	ENSG00000158545	chr16	+	88636789	88636974	88638021	88638080	88643517	88644134	ENSG00000158545:88636789-88636974:source	ENSG00000158545:88643518-88644134:target
FANCA	ENSG00000187741	chr16	-	89871687	89871800	89869666	89869749	89866013	89866046	ENSG00000187741:89866013-89866046:source	ENSG00000187741:89871688-89871800:target
AFG3L1P	ENSG00000223959	chr16	+	90056740	90057411	90057636	90057791	90059128	90059236	ENSG00000223959:90056740-90057411:source	ENSG00000223959:90059129-90059236:target
USP14	ENSG00000101557	chr18	+	203098	203190	204563	204692	209970	210031	ENSG00000101557:203098-203190:source	ENSG00000101557:209971-210031:target
YES1	ENSG00000176105	chr18	-	732833	732965	729155	729407	722632	724632	ENSG00000176105:721588-724632:source	ENSG00000176105:732834-732965:target
SMCHD1	ENSG00000101596	chr18	+	2772248	2772370	2775731	2775922	2777803	2777913	ENSG00000101596:2772248-2772370:source	ENSG00000101596:2777804-2777913:target
AFG3L2	ENSG00000141385	chr18	-	12359925	12360232	12359048	12359255	12358669	12358942	ENSG00000141385:12358669-12358942:source	ENSG00000141385:12359926-12360232:target
SEH1L	ENSG00000085415	chr18	+	12947994	12948231	12951853	12951904	12955461	12955609	ENSG00000085415:12947994-12948231:source	ENSG00000085415:12955462-12955609:target
CEP192	ENSG00000101639	chr18	+	12999420	12999587	13000310	13000485	13001455	13001581	ENSG00000101639:12999420-12999587:source	ENSG00000101639:13001456-13001581:target
RBBP8	ENSG00000101773	chr18	+	20555116	20555182	20557752	20557850	20562180	20562356	ENSG00000101773:20555116-20555182:source	ENSG00000101773:20562181-20562356:target
TMEM241	ENSG00000134490	chr18	-	20950179	20950245	20948678	20948714	20945598	20945632	ENSG00000134490:20945598-20945632:source	ENSG00000134490:20950180-20950245:target
C18orf8	ENSG00000141452	chr18	+	21096284	21096387	21097158	21097256	21098853	21098943	ENSG00000141452:21096284-21096387:source	ENSG00000141452:21098854-21098943:target
TAF4B	ENSG00000141384	chr18	+	23937654	23937758	23968074	23968133	23969808	23971649	ENSG00000141384:23937654-23937758:source	ENSG00000141384:23969809-23971649:target
DSG2	ENSG00000046604	chr18	+	29078006	29078259	29089260	29089298	29098201	29098237	ENSG00000046604:29078006-29078259:source	ENSG00000046604:29098202-29098237:target
TRAPPC8	ENSG00000153339	chr18	-	29437502	29437945	29435622	29435770	29433812	29433908	ENSG00000153339:29433812-29433908:source	ENSG00000153339:29437503-29437945:target
HAUS1	ENSG00000152240	chr18	+	43703147	43703330	43704787	43704859	43705709	43705941	ENSG00000152240:43703147-43703330:source	ENSG00000152240:43705710-43705941:target
ME2	ENSG00000082212	chr18	+	48452126	48452268	48458627	48458730	48465939	48466010	ENSG00000082212:48452126-48452268:source	ENSG00000082212:48465940-48466010:target
TXNL1	ENSG00000091164	chr18	-	54281654	54281827	54281066	54281228	54276328	54278328	ENSG00000091164:54275510-54278328:source	ENSG00000091164:54281655-54281827:target
WDR7	ENSG00000091157	chr18	+	54426096	54426184	54444012	54444111	54446661	54446780	ENSG00000091157:54426096-54426184:source	ENSG00000091157:54446662-54446780:target
WDR7	ENSG00000091157	chr18	+	54603019	54603136	54603411	54603460	54605763	54605913	ENSG00000091157:54603019-54603136:source	ENSG00000091157:54605764-54605913:target
NARS	ENSG00000134440	chr18	-	55283048	55283254	55282872	55282962	55280834	55280912	ENSG00000134440:55280834-55280912:source	ENSG00000134440:55283049-55283254:target
MALT1	ENSG00000172175	chr18	+	56348402	56348568	56351698	56351821	56363597	56363719	ENSG00000172175:56348402-56348568:source	ENSG00000172175:56363598-56363719:target
PIGN	ENSG00000197563	chr18	-	59772775	59772867	59770951	59771032	59770027	59770135	ENSG00000197563:59770027-59770135:source	ENSG00000197563:59772776-59772867:target
KIAA1468	ENSG00000134444	chr18	+	59935748	59936181	59936643	59936745	59941212	59941319	ENSG00000134444:59935748-59936181:source	ENSG00000134444:59941213-59941319:target
ZCCHC2	ENSG00000141664	chr18	+	60209731	60209807	60212034	60212106	60217580	60217693	ENSG00000141664:60209731-60209807:source	ENSG00000141664:60217581-60217693:target
ADNP2	ENSG00000101544	chr18	+	77890986	77891075	77891574	77891689	77893494	77895494	ENSG00000101544:77890986-77891075:source	ENSG00000101544:77893495-77898234:target
RAD18	ENSG00000070950	chr3	-	9000603	9000685	8990192	8990254	8988636	8988974	ENSG00000070950:8988636-8988974:source	ENSG00000070950:9000604-9000685:target
RAD18	ENSG00000070950	chr3	-	9005018	9005277	9000603	9000685	8990193	8990254	ENSG00000070950:8990193-8990254:source	ENSG00000070950:9005019-9005277:target
IL17RC	ENSG00000163702	chr3	+	9958758	9959104	9959202	9959317	9959396	9959418	ENSG00000163702:9958758-9959104:source	ENSG00000163702:9959397-9959418:target
FANCD2	ENSG00000144554	chr3	+	10116214	10116357	10119764	10119881	10122783	10122912	ENSG00000144554:10116214-10116357:source	ENSG00000144554:10122784-10122912:target
FANCD2	ENSG00000144554	chr3	+	10134969	10135007	10135972	10136047	10136883	10136958	ENSG00000144554:10134969-10135007:source	ENSG00000144554:10136884-10136958:target
ATG7	ENSG00000197548	chr3	+	11421446	11421526	11468277	11468400	11596284	11598284	ENSG00000197548:11421446-11421526:source	ENSG00000197548:11596285-11599139:target
PPARG	ENSG00000132170	chr3	+	12434113	12434251	12440846	12440989	12447380	12448345	ENSG00000132170:12434113-12434251:source	ENSG00000132170:12447381-12448345:target
NUP210	ENSG00000132182	chr3	-	13373792	13373884	13371959	13372134	13370271	13370446	ENSG00000132182:13370271-13370446:source	ENSG00000132182:13373793-13373884:target
NUP210	ENSG00000132182	chr3	-	13413333	13413532	13407445	13407591	13401770	13401991	ENSG00000132182:13401770-13401991:source	ENSG00000132182:13413334-13413532:target
TMEM43	ENSG00000170876	chr3	+	14166440	14166705	14170354	14170585	14170911	14171061	ENSG00000170876:14166440-14166705:source	ENSG00000170876:14170912-14171061:target
HACL1	ENSG00000131373	chr3	-	15614665	15614749	15613174	15613276	15609939	15610093	ENSG00000131373:15609939-15610093:source	ENSG00000131373:15614666-15614749:target
ANKRD28	ENSG00000206560	chr3	-	15807740	15807819	15793256	15793327	15778540	15778740	ENSG00000206560:15778540-15778740:source	ENSG00000206560:15807741-15807819:target
RFTN1	ENSG00000131378	chr3	-	16475357	16475544	16457618	16457718	16450882	16450990	ENSG00000131378:16450882-16450990:source	ENSG00000131378:16475358-16475544:target
SLC4A7	ENSG00000033867	chr3	-	27453132	27453239	27450846	27451021	27446321	27446454	ENSG00000033867:27446321-27446454:source	ENSG00000033867:27453133-27453239:target
CNOT10	ENSG00000182973	chr3	+	32758646	32758729	32761605	32761723	32766941	32767094	ENSG00000182973:32758646-32758729:source	ENSG00000182973:32766942-32767094:target
GLB1	ENSG00000170266	chr3	-	33094982	33095041	33094156	33094283	33093373	33093496	ENSG00000170266:33093373-33093496:source	ENSG00000170266:33094983-33095041:target
MLH1	ENSG00000076242	chr3	+	37045892	37045965	37047351	37047457	37048481	37048554	ENSG00000076242:37045892-37045965:source	ENSG00000076242:37048482-37048554:target
MLH1	ENSG00000076242	chr3	+	37083759	37083822	37089009	37089174	37090007	37090100	ENSG00000076242:37083759-37083822:source	ENSG00000076242:37090008-37090100:target
OXSR1	ENSG00000172939	chr3	+	38232222	38232330	38234772	38234909	38240212	38240354	ENSG00000172939:38232222-38232330:source	ENSG00000172939:38240213-38240354:target
TRAK1	ENSG00000182606	chr3	+	42234567	42234697	42235315	42235390	42236295	42236433	ENSG00000182606:42234567-42234697:source	ENSG00000182606:42236296-42236433:target
ANO10	ENSG00000160746	chr3	-	43616300	43616356	43607144	43607219	43602712	43602894	ENSG00000160746:43602712-43602894:source	ENSG00000160746:43616301-43616356:target
KIF15	ENSG00000163808	chr3	+	44867867	44867952	44868487	44868685	44868950	44869020	ENSG00000163808:44867867-44867952:source	ENSG00000163808:44868951-44869020:target
FYCO1	ENSG00000163820	chr3	-	45996740	45996885	45979687	45979747	45977940	45978035	ENSG00000163820:45977940-45978035:source	ENSG00000163820:45996741-45996885:target
NBEAL2	ENSG00000160796	chr3	+	47037761	47038082	47038240	47038323	47038443	47038536	ENSG00000160796:47037761-47038082:source	ENSG00000160796:47038444-47038536:target
SETD2	ENSG00000181555	chr3	-	47108559	47108608	47106044	47106120	47103650	47103836	ENSG00000181555:47103650-47103836:source	ENSG00000181555:47108560-47108608:target
SETD2	ENSG00000181555	chr3	-	47155365	47155494	47147486	47147610	47144836	47144913	ENSG00000181555:47144836-47144913:source	ENSG00000181555:47155366-47155494:target
SMARCC1	ENSG00000173473	chr3	-	47718118	47718272	47716964	47717078	47711840	47712207	ENSG00000173473:47711840-47712207:source	ENSG00000173473:47718119-47718272:target
SMARCC1	ENSG00000173473	chr3	-	47762155	47762225	47759511	47759601	47755905	47755980	ENSG00000173473:47755905-47755980:source	ENSG00000173473:47762156-47762225:target
SMARCC1	ENSG00000173473	chr3	-	47777523	47777616	47772029	47772187	47770515	47770584	ENSG00000173473:47770515-47770584:source	ENSG00000173473:47777524-47777616:target
SMARCC1	ENSG00000173473	chr3	-	47787397	47787483	47779518	47779600	47777524	47777616	ENSG00000173473:47777524-47777616:source	ENSG00000173473:47787398-47787483:target
MAP4	ENSG00000047849	chr3	-	47969717	47969840	47963254	47963368	47960209	47960331	ENSG00000047849:47960209-47960331:source	ENSG00000047849:47969718-47969840:target
PLXNB1	ENSG00000164050	chr3	-	48460652	48460775	48460325	48460448	48459858	48459951	ENSG00000164050:48459858-48459951:source	ENSG00000164050:48460653-48460775:target
ATRIP	ENSG00000164053	chr3	+	48491443	48491576	48491898	48491981	48493134	48493305	ENSG00000164053:48491443-48491576:source	ENSG00000164053:48493135-48493305:target
CELSR3	ENSG00000008300	chr3	-	48687912	48688014	48687707	48687722	48686554	48686648	ENSG00000008300:48686554-48686648:source	ENSG00000008300:48687913-48688014:target
SLC25A20	ENSG00000178537	chr3	-	48936122	48936426	48933187	48933248	48929413	48929505	ENSG00000178537:48929413-48929505:source	ENSG00000178537:48936123-48936426:target
USP4	ENSG00000114316	chr3	-	49372901	49373029	49365118	49365249	49363152	49363278	ENSG00000114316:49363152-49363278:source	ENSG00000114316:49372902-49373029:target
USP4	ENSG00000114316	chr3	-	49377356	49377504	49372901	49373029	49365119	49365249	ENSG00000114316:49365119-49365249:source	ENSG00000114316:49377357-49377504:target
RNF123	ENSG00000164068	chr3	+	49735763	49735959	49736187	49736255	49736412	49736538	ENSG00000164068:49735763-49735959:source	ENSG00000164068:49736413-49736538:target
MAPKAPK3	ENSG00000114738	chr3	+	50679684	50679763	50681839	50681963	50683140	50683216	ENSG00000114738:50679684-50679763:source	ENSG00000114738:50683141-50683216:target
ABHD14A-ACY1	ENSG00000114786	chr3	+	52019377	52019481	52019867	52019962	52020270	52020347	ENSG00000114786:52019377-52019481:source	ENSG00000114786:52020271-52020347:target
PBRM1	ENSG00000163939	chr3	-	52678719	52678805	52677263	52677359	52675970	52676061	ENSG00000163939:52675970-52676061:source	ENSG00000163939:52678720-52678805:target
SFMBT1	ENSG00000163935	chr3	-	52941084	52941330	52940128	52940257	52937588	52939292	ENSG00000163935:52937588-52939292:source	ENSG00000163935:52941085-52941330:target
RFT1	ENSG00000163933	chr3	-	53145845	53145924	53140834	53140885	53139689	53139819	ENSG00000163933:53139689-53139819:source	ENSG00000163933:53145846-53145924:target
RFT1	ENSG00000163933	chr3	-	53159924	53160010	53157739	53157856	53156390	53156579	ENSG00000163933:53156390-53156579:source	ENSG00000163933:53159925-53160010:target
APPL1	ENSG00000157500	chr3	+	57281423	57281505	57282220	57282379	57283387	57283576	ENSG00000157500:57281423-57281505:source	ENSG00000157500:57283388-57283576:target
APPL1	ENSG00000157500	chr3	+	57286297	57286339	57287709	57287766	57290984	57291079	ENSG00000157500:57286297-57286339:source	ENSG00000157500:57290985-57291079:target
FLNB	ENSG00000136068	chr3	+	58117805	58118658	58120342	58120499	58121705	58121895	ENSG00000136068:58117805-58118658:source	ENSG00000136068:58121706-58121895:target
FLNB	ENSG00000136068	chr3	+	58132405	58132720	58133932	58134091	58134375	58134579	ENSG00000136068:58132405-58132720:source	ENSG00000136068:58134376-58134579:target
ABHD6	ENSG00000163686	chr3	+	58242289	58242432	58244129	58244351	58252915	58253072	ENSG00000163686:58242289-58242432:source	ENSG00000163686:58252916-58253072:target
PXK	ENSG00000168297	chr3	+	58385026	58385104	58388177	58388299	58389588	58389637	ENSG00000168297:58385026-58385104:source	ENSG00000168297:58389589-58389637:target
FOXP1	ENSG00000114861	chr3	-	71021705	71021827	71021161	71021331	71019887	71019956	ENSG00000114861:71019887-71019956:source	ENSG00000114861:71021706-71021827:target
NXPE3	ENSG00000144815	chr3	+	101525897	101525970	101535638	101535845	101540247	101542247	ENSG00000144815:101525897-101525970:source	ENSG00000144815:101540248-101547073:target
CBLB	ENSG00000114423	chr3	-	105452852	105452984	105442869	105443033	105438891	105439094	ENSG00000114423:105438891-105439094:source	ENSG00000114423:105452853-105452984:target
DZIP3	ENSG00000198919	chr3	+	108363011	108363628	108365463	108365496	108366789	108366959	ENSG00000198919:108363011-108363628:source	ENSG00000198919:108366790-108366959:target
ATP6V1A	ENSG00000114573	chr3	+	113507560	113507722	113508578	113508687	113513718	113513841	ENSG00000114573:113507560-113507722:source	ENSG00000114573:113513719-113513841:target
GRAMD1C	ENSG00000178075	chr3	+	113627805	113627967	113631919	113632007	113634547	113634685	ENSG00000178075:113627805-113627967:source	ENSG00000178075:113634548-113634685:target
RABL3	ENSG00000144840	chr3	-	120449542	120449634	120428626	120428756	120424847	120424961	ENSG00000144840:120424847-120424961:source	ENSG00000144840:120449543-120449634:target
FAM162A	ENSG00000114023	chr3	+	122103023	122103146	122120222	122120382	122121606	122121729	ENSG00000114023:122103023-122103146:source	ENSG00000114023:122121607-122121729:target
FAM162A	ENSG00000114023	chr3	+	122121607	122121729	122123104	122123210	122126127	122126811	ENSG00000114023:122121607-122121729:source	ENSG00000114023:122126128-122126811:target
KPNA1	ENSG00000114030	chr3	-	122215283	122215484	122194704	122194768	122186169	122186276	ENSG00000114030:122186169-122186276:source	ENSG00000114030:122215284-122215484:target
HSPBAP1	ENSG00000169087	chr3	-	122512463	122512671	122505255	122505337	122496568	122496753	ENSG00000169087:122496568-122496753:source	ENSG00000169087:122512464-122512671:target
SNX4	ENSG00000114520	chr3	-	125238875	125239041	125223466	125223588	125216903	125217038	ENSG00000114520:125216903-125217038:source	ENSG00000114520:125238876-125239041:target
MCM2	ENSG00000073111	chr3	+	127327675	127327866	127329621	127329828	127334704	127334798	ENSG00000073111:127327675-127327866:source	ENSG00000073111:127334705-127334798:target
ISY1	ENSG00000240682	chr3	-	128864603	128864717	128862910	128863032	128859211	128859328	ENSG00000240682:128859211-128859328:source	ENSG00000240682:128864604-128864717:target
DNAJC13	ENSG00000138246	chr3	+	132249842	132249941	132256001	132256110	132257019	132257876	ENSG00000138246:132249842-132249941:source	ENSG00000138246:132257020-132257876:target
NPHP3	ENSG00000113971	chr3	-	132402242	132402388	132401546	132401662	132399453	132400934	ENSG00000113971:132399453-132400934:source	ENSG00000113971:132402243-132402388:target
STAG1	ENSG00000118007	chr3	-	136191254	136191334	136183722	136183830	136170875	136170989	ENSG00000118007:136170875-136170989:source	ENSG00000118007:136191255-136191334:target
PIK3CB	ENSG00000051382	chr3	-	138456548	138456728	138453475	138453646	138452203	138452280	ENSG00000051382:138452203-138452280:source	ENSG00000051382:138456549-138456728:target
GK5	ENSG00000175066	chr3	-	141896323	141896447	141891917	141892039	141891195	141891298	ENSG00000175066:141891195-141891298:source	ENSG00000175066:141896324-141896447:target
HLTF	ENSG00000071794	chr3	-	148765814	148765950	148763866	148764046	148759953	148760077	ENSG00000071794:148759953-148760077:source	ENSG00000071794:148765815-148765950:target
HLTF	ENSG00000071794	chr3	-	148773089	148773187	148769831	148769931	148768057	148768162	ENSG00000071794:148768057-148768162:source	ENSG00000071794:148773090-148773187:target
EIF2A	ENSG00000144895	chr3	+	150290283	150290316	150293435	150293549	150299404	150299533	ENSG00000144895:150290283-150290316:source	ENSG00000144895:150299405-150299533:target
EIF2A	ENSG00000144895	chr3	+	150293436	150293549	150299404	150299533	150300986	150301052	ENSG00000144895:150293436-150293549:source	ENSG00000144895:150300987-150301052:target
GMPS	ENSG00000163655	chr3	+	155621652	155621749	155623948	155624052	155628480	155628674	ENSG00000163655:155621652-155621749:source	ENSG00000163655:155628481-155628674:target
MFSD1	ENSG00000118855	chr3	+	158538004	158538115	158539385	158539442	158539772	158539929	ENSG00000118855:158538004-158538115:source	ENSG00000118855:158539773-158539929:target
KPNA4	ENSG00000186432	chr3	-	160231864	160231969	160227587	160227659	160225895	160226057	ENSG00000186432:160225895-160226057:source	ENSG00000186432:160231865-160231969:target
NMD3	ENSG00000169251	chr3	+	160960296	160960441	160964123	160964236	160965045	160965118	ENSG00000169251:160960296-160960441:source	ENSG00000169251:160965046-160965118:target
NMD3	ENSG00000169251	chr3	+	160967242	160967348	160968043	160968114	160968567	160970095	ENSG00000169251:160967242-160967348:source	ENSG00000169251:160968568-160970095:target
PRKCI	ENSG00000163558	chr3	+	169981167	169981217	169985702	169985788	169988208	169988349	ENSG00000163558:169981167-169981217:source	ENSG00000163558:169988209-169988349:target
ZMAT3	ENSG00000172667	chr3	-	178785270	178785597	178748667	178748787	178745430	178745600	ENSG00000172667:178745430-178745600:source	ENSG00000172667:178785271-178785597:target
USP13	ENSG00000058056	chr3	+	179481790	179481956	179483482	179483636	179499526	179499611	ENSG00000058056:179481790-179481956:source	ENSG00000058056:179499527-179499611:target
ATP11B	ENSG00000058063	chr3	+	182511288	182511574	182538047	182538164	182545907	182545997	ENSG00000058063:182511288-182511574:source	ENSG00000058063:182545908-182545997:target
ATP11B	ENSG00000058063	chr3	+	182602541	182602686	182603738	182603798	182605373	182605501	ENSG00000058063:182602541-182602686:source	ENSG00000058063:182605374-182605501:target
MCF2L2	ENSG00000053524	chr3	-	183028702	183028817	183028303	183028443	183027504	183027623	ENSG00000053524:183027504-183027623:source	ENSG00000053524:183028703-183028817:target
YEATS2	ENSG00000163872	chr3	+	183442207	183442319	183446477	183446639	183454505	183454617	ENSG00000163872:183442207-183442319:source	ENSG00000163872:183454506-183454617:target
PARL	ENSG00000175193	chr3	-	183585652	183585848	183584412	183584553	183580395	183580589	ENSG00000175193:183580395-183580589:source	ENSG00000175193:183585653-183585848:target
ATP13A3	ENSG00000133657	chr3	-	194165453	194165515	194162039	194162190	194159406	194159701	ENSG00000133657:194159406-194159701:source	ENSG00000133657:194165454-194165515:target
UBXN7	ENSG00000163960	chr3	-	196089164	196089572	196088714	196088794	196081717	196083717	ENSG00000163960:196074533-196083717:source	ENSG00000163960:196089165-196089572:target
FBXO45	ENSG00000174013	chr3	+	196304324	196304680	196306262	196306344	196311003	196313003	ENSG00000174013:196304324-196304680:source	ENSG00000174013:196311004-196315930:target
CEP19	ENSG00000174007	chr3	-	196438799	196439164	196435398	196435598	196433148	196434783	ENSG00000174007:196433148-196434783:source	ENSG00000174007:196438800-196439164:target
DLG1	ENSG00000075711	chr3	-	196792146	196792335	196786759	196786869	196778448	196778539	ENSG00000075711:196778448-196778539:source	ENSG00000075711:196792147-196792335:target
HERC2	ENSG00000128731	chr15	-	28412832	28412973	28408239	28408431	28397823	28397976	ENSG00000128731:28397823-28397976:source	ENSG00000128731:28412833-28412973:target
HERC2	ENSG00000128731	chr15	-	28544547	28544662	28543662	28543775	28538034	28538168	ENSG00000128731:28538034-28538168:source	ENSG00000128731:28544548-28544662:target
MTMR10	ENSG00000166912	chr15	-	31283649	31283810	31282979	31283040	31269022	31269158	ENSG00000166912:31269022-31269158:source	ENSG00000166912:31283650-31283810:target
EMC7	ENSG00000134153	chr15	-	34388095	34388215	34382517	34382656	34380254	34380334	ENSG00000134153:34380254-34380334:source	ENSG00000134153:34388096-34388215:target
ZNF770	ENSG00000198146	chr15	-	35280316	35280488	35279757	35279874	35273691	35275691	ENSG00000198146:35270542-35275691:source	ENSG00000198146:35280317-35280488:target
RASGRP1	ENSG00000172575	chr15	-	38798040	38798121	38795472	38795577	38794513	38794622	ENSG00000172575:38794513-38794622:source	ENSG00000172575:38798041-38798121:target
EIF2AK4	ENSG00000128829	chr15	+	40270279	40270348	40278005	40278089	40280183	40280306	ENSG00000128829:40270279-40270348:source	ENSG00000128829:40280184-40280306:target
EIF2AK4	ENSG00000128829	chr15	+	40284970	40285049	40287957	40288064	40289164	40289266	ENSG00000128829:40284970-40285049:source	ENSG00000128829:40289165-40289266:target
CASC5	ENSG00000137812	chr15	+	40921471	40921569	40933109	40933225	40937194	40937285	ENSG00000137812:40921471-40921569:source	ENSG00000137812:40937195-40937285:target
CASC5	ENSG00000137812	chr15	+	40944203	40944303	40947106	40947175	40949239	40949349	ENSG00000137812:40944203-40944303:source	ENSG00000137812:40949240-40949349:target
INO80	ENSG00000128908	chr15	-	41313097	41313323	41308285	41308413	41297791	41297885	ENSG00000128908:41297791-41297885:source	ENSG00000128908:41313098-41313323:target
INO80	ENSG00000128908	chr15	-	41350836	41350979	41348819	41348904	41347445	41347562	ENSG00000128908:41347445-41347562:source	ENSG00000128908:41350837-41350979:target
INO80	ENSG00000128908	chr15	-	41352064	41352124	41350836	41350979	41348820	41348904	ENSG00000128908:41348820-41348904:source	ENSG00000128908:41352065-41352124:target
TMEM87A	ENSG00000103978	chr15	-	42556287	42556401	42554320	42554441	42553394	42553447	ENSG00000103978:42553394-42553447:source	ENSG00000103978:42556288-42556401:target
STARD9	ENSG00000159433	chr15	+	43009929	43009993	43010174	43010377	43010632	43010712	ENSG00000159433:43009929-43009993:source	ENSG00000159433:43010633-43010712:target
UBR1	ENSG00000159459	chr15	-	43268914	43269065	43262717	43262805	43258351	43258484	ENSG00000159459:43258351-43258484:source	ENSG00000159459:43268915-43269065:target
UBR1	ENSG00000159459	chr15	-	43317026	43317181	43314899	43314999	43313279	43313573	ENSG00000159459:43313279-43313573:source	ENSG00000159459:43317027-43317181:target
UBR1	ENSG00000159459	chr15	-	43348541	43348640	43346939	43347097	43340590	43340689	ENSG00000159459:43340590-43340689:source	ENSG00000159459:43348542-43348640:target
UBR1	ENSG00000159459	chr15	-	43351282	43351390	43350538	43350627	43348542	43348640	ENSG00000159459:43348542-43348640:source	ENSG00000159459:43351283-43351390:target
PPIP5K1	ENSG00000168781	chr15	-	43831667	43831781	43828332	43828452	43825674	43827674	ENSG00000168781:43825660-43827674:source	ENSG00000168781:43831668-43831781:target
PDIA3	ENSG00000167004	chr15	+	44062448	44062527	44062720	44062778	44063302	44065302	ENSG00000167004:44062448-44062527:source	ENSG00000167004:44063303-44065477:target
HYPK	ENSG00000242028	chr15	+	44092509	44092982	44093329	44093385	44093715	44093788	ENSG00000242028:44092509-44092982:source	ENSG00000242028:44093716-44093788:target
WDR76	ENSG00000092470	chr15	+	44131803	44131926	44134612	44134714	44134825	44134869	ENSG00000092470:44131803-44131926:source	ENSG00000092470:44134826-44134869:target
WDR76	ENSG00000092470	chr15	+	44136099	44136252	44143284	44143443	44149143	44149361	ENSG00000092470:44136099-44136252:source	ENSG00000092470:44149144-44149361:target
CTDSPL2	ENSG00000137770	chr15	+	44751189	44751398	44762666	44762772	44776421	44776560	ENSG00000137770:44751189-44751398:source	ENSG00000137770:44776422-44776560:target
TRPM7	ENSG00000092439	chr15	-	50916362	50916497	50911941	50911995	50906320	50906460	ENSG00000092439:50906320-50906460:source	ENSG00000092439:50916363-50916497:target
TMOD3	ENSG00000138594	chr15	+	52186012	52186142	52188615	52188723	52192351	52192495	ENSG00000138594:52186012-52186142:source	ENSG00000138594:52192352-52192495:target
MAPK6	ENSG00000069956	chr15	+	52350830	52350994	52353495	52353697	52356098	52358098	ENSG00000069956:52350830-52350994:source	ENSG00000069956:52356099-52358462:target
FAM214A	ENSG00000047346	chr15	-	52893282	52893362	52892323	52892432	52885614	52885933	ENSG00000047346:52885614-52885933:source	ENSG00000047346:52893283-52893362:target
PIGB	ENSG00000069943	chr15	+	55621922	55622052	55626064	55626205	55631464	55631516	ENSG00000069943:55621922-55622052:source	ENSG00000069943:55631465-55631516:target
NEDD4	ENSG00000069869	chr15	-	56140569	56140628	56139166	56139232	56134132	56134361	ENSG00000069869:56134132-56134361:source	ENSG00000069869:56140570-56140628:target
CCNB2	ENSG00000157456	chr15	+	59408889	59409125	59409426	59409567	59415715	59415989	ENSG00000157456:59408889-59409125:source	ENSG00000157456:59415716-59415989:target
VPS13C	ENSG00000129003	chr15	-	62182363	62182599	62176326	62176468	62174795	62174935	ENSG00000129003:62174795-62174935:source	ENSG00000129003:62182364-62182599:target
VPS13C	ENSG00000129003	chr15	-	62223288	62223458	62221699	62221947	62219290	62219519	ENSG00000129003:62219290-62219519:source	ENSG00000129003:62223289-62223458:target
HERC1	ENSG00000103657	chr15	-	63929703	63929842	63929186	63929333	63928160	63928341	ENSG00000103657:63928160-63928341:source	ENSG00000103657:63929704-63929842:target
TRIP4	ENSG00000103671	chr15	+	64717739	64717830	64737204	64737307	64747195	64747502	ENSG00000103671:64717739-64717830:source	ENSG00000103671:64747196-64747502:target
MAP2K1	ENSG00000169032	chr15	+	66727365	66727575	66729083	66729230	66735617	66735695	ENSG00000169032:66727365-66727575:source	ENSG00000169032:66735618-66735695:target
MAP2K1	ENSG00000169032	chr15	+	66729084	66729230	66735617	66735695	66736993	66737304	ENSG00000169032:66729084-66729230:source	ENSG00000169032:66736994-66737304:target
AAGAB	ENSG00000103591	chr15	-	67500899	67500996	67497356	67497384	67496382	67496486	ENSG00000103591:67496382-67496486:source	ENSG00000103591:67500900-67500996:target
MYO9A	ENSG00000066933	chr15	-	72143593	72143699	72142376	72142508	72141186	72141309	ENSG00000066933:72141186-72141309:source	ENSG00000066933:72143594-72143699:target
MYO9A	ENSG00000066933	chr15	-	72338064	72338323	72324834	72324929	72320072	72320134	ENSG00000066933:72320072-72320134:source	ENSG00000066933:72338065-72338323:target
HEXA	ENSG00000213614	chr15	-	72648865	72650865	72648250	72648317	72647785	72647965	ENSG00000213614:72647785-72647965:source	ENSG00000213614:72648866-72652794:target
SCAPER	ENSG00000140386	chr15	-	76866498	76866625	76859610	76859746	76797200	76797315	ENSG00000140386:76797200-76797315:source	ENSG00000140386:76866499-76866625:target
SCAPER	ENSG00000140386	chr15	-	77046148	77046289	77031642	77031778	77025570	77025725	ENSG00000140386:77025570-77025725:source	ENSG00000140386:77046149-77046289:target
IREB2	ENSG00000136381	chr15	+	78782764	78782868	78782960	78783103	78786250	78786398	ENSG00000136381:78782764-78782868:source	ENSG00000136381:78786251-78786398:target
EFTUD1	ENSG00000140598	chr15	-	82533610	82533744	82532758	82532896	82530648	82530862	ENSG00000140598:82530648-82530862:source	ENSG00000140598:82533611-82533744:target
ENSG00000184779	ENSG00000184779	chr15	-	82822713	82822779	82822329	82822450	82821158	82821289	ENSG00000184779:82821158-82821289:source	ENSG00000184779:82822714-82822779:target
TM6SF1	ENSG00000136404	chr15	+	83781549	83781652	83784596	83784694	83788329	83788486	ENSG00000136404:83781549-83781652:source	ENSG00000136404:83788330-83788486:target
MRPL46	ENSG00000259494	chr15	-	89007933	89008107	89003383	89003613	89002707	89003094	ENSG00000259494:89002707-89003094:source	ENSG00000259494:89007934-89008107:target
UNC45A	ENSG00000140553	chr15	+	91492546	91492673	91492883	91492950	91493383	91493497	ENSG00000140553:91492546-91492673:source	ENSG00000140553:91493384-91493497:target
CHD2	ENSG00000173575	chr15	+	93514995	93515157	93515494	93515647	93518108	93518180	ENSG00000173575:93514995-93515157:source	ENSG00000173575:93518109-93518180:target
TARSL2	ENSG00000185418	chr15	-	102197124	102197239	102196069	102196223	102193801	102194933	ENSG00000185418:102193801-102194933:source	ENSG00000185418:102197125-102197239:target
KDM5A	ENSG00000073614	chr12	-	495062	495140	493196	493319	475100	475270	ENSG00000073614:475100-475270:source	ENSG00000073614:495063-495140:target
B4GALNT3	ENSG00000139044	chr12	+	667527	667827	668460	668587	670508	672508	ENSG00000139044:667527-667827:source	ENSG00000139044:670509-672675:target
ERC1	ENSG00000082805	chr12	+	1299025	1299218	1313666	1313678	1345934	1346070	ENSG00000082805:1299025-1299218:source	ENSG00000082805:1345935-1346070:target
PARP11	ENSG00000111224	chr12	-	3931038	3931196	3924160	3924219	3923203	3923354	ENSG00000111224:3923203-3923354:source	ENSG00000111224:3931039-3931196:target
C12orf5	ENSG00000078237	chr12	+	4446205	4446326	4458984	4459062	4460432	4460543	ENSG00000078237:4446205-4446326:source	ENSG00000078237:4460433-4460543:target
C12orf4	ENSG00000047621	chr12	-	4614471	4614546	4611476	4611648	4609304	4609506	ENSG00000047621:4609304-4609506:source	ENSG00000047621:4614472-4614546:target
NCAPD2	ENSG00000010292	chr12	+	6623630	6623753	6623938	6624086	6625993	6626191	ENSG00000010292:6623630-6623753:source	ENSG00000010292:6625994-6626191:target
ATN1	ENSG00000111676	chr12	+	7048270	7048340	7049615	7049666	7050042	7050186	ENSG00000111676:7048270-7048340:source	ENSG00000111676:7050043-7050186:target
CREBL2	ENSG00000111269	chr12	+	12764761	12765121	12785422	12785525	12788710	12788908	ENSG00000111269:12764761-12765121:source	ENSG00000111269:12788711-12788908:target
ATF7IP	ENSG00000171681	chr12	+	14609495	14609568	14610140	14610229	14613428	14614067	ENSG00000171681:14609495-14609568:source	ENSG00000171681:14613429-14614067:target
PLEKHA5	ENSG00000052126	chr12	+	19410408	19410471	19413882	19413955	19418683	19418784	ENSG00000052126:19410408-19410471:source	ENSG00000052126:19418684-19418784:target
PLEKHA5	ENSG00000052126	chr12	+	19422704	19422819	19423121	19423139	19427449	19427917	ENSG00000052126:19422704-19422819:source	ENSG00000052126:19427450-19427917:target
PLEKHA5	ENSG00000052126	chr12	+	19475452	19475601	19489448	19489550	19496256	19496368	ENSG00000052126:19475452-19475601:source	ENSG00000052126:19496257-19496368:target
AEBP2	ENSG00000139154	chr12	+	19615444	19615651	19619681	19619784	19626181	19626289	ENSG00000139154:19615444-19615651:source	ENSG00000139154:19626182-19626289:target
PYROXD1	ENSG00000121350	chr12	+	21593302	21593382	21594140	21594234	21598280	21598400	ENSG00000121350:21593302-21593382:source	ENSG00000121350:21598281-21598400:target
GOLT1B	ENSG00000111711	chr12	+	21665229	21665310	21668171	21668204	21668602	21670602	ENSG00000111711:21665229-21665310:source	ENSG00000111711:21668603-21671342:target
LRMP	ENSG00000118308	chr12	+	25254112	25254259	25254871	25254959	25255131	25255712	ENSG00000118308:25254112-25254259:source	ENSG00000118308:25255132-25255712:target
STK38L	ENSG00000211455	chr12	+	27472261	27472356	27475075	27475167	27475260	27477260	ENSG00000211455:27472261-27472356:source	ENSG00000211455:27475261-27478892:target
ARNTL2	ENSG00000029153	chr12	+	27568802	27568880	27571020	27571129	27573328	27575328	ENSG00000029153:27568802-27568880:source	ENSG00000029153:27573329-27576241:target
PPFIBP1	ENSG00000110841	chr12	+	27807319	27807747	27808075	27808168	27809548	27810056	ENSG00000110841:27807319-27807747:source	ENSG00000110841:27809549-27810056:target
RP11-551L14.1	ENSG00000177359	chr12	-	31269290	31269403	31268136	31268637	31267771	31267861	ENSG00000177359:31267771-31267861:source	ENSG00000177359:31269291-31269403:target
YARS2	ENSG00000139131	chr12	-	32903652	32903808	32902870	32903041	32899478	32900297	ENSG00000139131:32899478-32900297:source	ENSG00000139131:32903653-32903808:target
KIF21A	ENSG00000139116	chr12	-	39745578	39745782	39740267	39740306	39735836	39735926	ENSG00000139116:39735836-39735926:source	ENSG00000139116:39745579-39745782:target
ANO6	ENSG00000177119	chr12	+	45771836	45771896	45776977	45777138	45781943	45782086	ENSG00000177119:45771836-45771896:source	ENSG00000177119:45781944-45782086:target
RPAP3	ENSG00000005175	chr12	-	48060762	48060863	48058372	48058626	48057070	48057373	ENSG00000005175:48057070-48057373:source	ENSG00000005175:48060763-48060863:target
FMNL3	ENSG00000161791	chr12	-	50050186	50050280	50048692	50048767	50047975	50048085	ENSG00000161791:50047975-50048085:source	ENSG00000161791:50050187-50050280:target
DIP2B	ENSG00000066084	chr12	+	51034507	51034635	51048793	51048823	51053976	51054102	ENSG00000066084:51034507-51034635:source	ENSG00000066084:51053977-51054102:target
TFCP2	ENSG00000135457	chr12	-	51504659	51504766	51502903	51503056	51501019	51501129	ENSG00000135457:51501019-51501129:source	ENSG00000135457:51504660-51504766:target
SPRYD3	ENSG00000167778	chr12	-	53468878	53469003	53468432	53468568	53466944	53467255	ENSG00000167778:53466944-53467255:source	ENSG00000167778:53468879-53469003:target
SPRYD3	ENSG00000167778	chr12	-	53473094	53473204	53471844	53471955	53470899	53471045	ENSG00000167778:53470899-53471045:source	ENSG00000167778:53473095-53473204:target
NCKAP1L	ENSG00000123338	chr12	+	54920312	54920530	54922030	54922161	54925043	54925141	ENSG00000123338:54920312-54920530:source	ENSG00000123338:54925044-54925141:target
TESPA1	ENSG00000135426	chr12	-	55360171	55360208	55359836	55359935	55357525	55357734	ENSG00000135426:55357525-55357734:source	ENSG00000135426:55360172-55360208:target
SARNP	ENSG00000205323	chr12	-	56197412	56197512	56194637	56194684	56194346	56194413	ENSG00000205323:56194346-56194413:source	ENSG00000205323:56197413-56197512:target
PAN2	ENSG00000135473	chr12	-	56715861	56715952	56714302	56714421	56713648	56713805	ENSG00000135473:56713648-56713805:source	ENSG00000135473:56715862-56715952:target
TIMELESS	ENSG00000111602	chr12	-	56843093	56843187	56830112	56830234	56827858	56828015	ENSG00000111602:56827858-56828015:source	ENSG00000111602:56843094-56843187:target
AGAP2	ENSG00000135439	chr12	-	58123421	58123550	58122100	58122160	58121720	58121868	ENSG00000135439:58121720-58121868:source	ENSG00000135439:58123422-58123550:target
AGAP2	ENSG00000135439	chr12	-	58127808	58127956	58126627	58126762	58126186	58126295	ENSG00000135439:58126186-58126295:source	ENSG00000135439:58127809-58127956:target
MON2	ENSG00000061987	chr12	+	62877950	62878013	62883815	62883896	62887694	62887822	ENSG00000061987:62877950-62878013:source	ENSG00000061987:62887695-62887822:target
XPOT	ENSG00000184575	chr12	+	64833024	64833095	64838854	64838911	64841884	64843884	ENSG00000184575:64833024-64833095:source	ENSG00000184575:64841885-64844907:target
NUP107	ENSG00000111581	chr12	+	69115881	69115932	69119506	69119576	69120278	69120397	ENSG00000111581:69115881-69115932:source	ENSG00000111581:69120279-69120397:target
CPSF6	ENSG00000111605	chr12	+	69644955	69645118	69645865	69645996	69646830	69646934	ENSG00000111605:69644955-69645118:source	ENSG00000111605:69646831-69646934:target
CCT2	ENSG00000166226	chr12	+	69991418	69991546	69991747	69991851	69992101	69992201	ENSG00000166226:69991418-69991546:source	ENSG00000166226:69992102-69992201:target
TMEM19	ENSG00000139291	chr12	+	72083371	72083484	72084118	72084210	72090215	72090353	ENSG00000139291:72083371-72083484:source	ENSG00000139291:72090216-72090353:target
ZDHHC17	ENSG00000186908	chr12	+	77199097	77199219	77202822	77202900	77203492	77203637	ENSG00000186908:77199097-77199219:source	ENSG00000186908:77203493-77203637:target
CSRP2	ENSG00000175183	chr12	-	77256955	77258734	77256589	77256739	77254064	77254193	ENSG00000175183:77254064-77254193:source	ENSG00000175183:77256956-77258734:target
PPP1R12A	ENSG00000058272	chr12	-	80266587	80266718	80242567	80242711	80239082	80239200	ENSG00000058272:80239082-80239200:source	ENSG00000058272:80266588-80266718:target
METTL25	ENSG00000127720	chr12	+	82796762	82796909	82801595	82801650	82824671	82824766	ENSG00000127720:82796762-82796909:source	ENSG00000127720:82824672-82824766:target
ATP2B1	ENSG00000070961	chr12	-	89992893	89993076	89992366	89992520	89983072	89985072	ENSG00000070961:89981828-89985072:source	ENSG00000070961:89992894-89993076:target
METAP2	ENSG00000111142	chr12	+	95897841	95897937	95905670	95905774	95906576	95906692	ENSG00000111142:95897841-95897937:source	ENSG00000111142:95906577-95906692:target
LTA4H	ENSG00000111144	chr12	-	96414862	96414915	96414467	96414536	96412946	96413018	ENSG00000111144:96412946-96413018:source	ENSG00000111144:96414863-96414915:target
CDK17	ENSG00000059758	chr12	-	96793763	96794338	96728496	96728643	96717726	96717890	ENSG00000059758:96717726-96717890:source	ENSG00000059758:96793764-96794338:target
TMPO	ENSG00000120802	chr12	+	98938417	98938839	98940136	98940225	98941350	98943350	ENSG00000120802:98938417-98938839:source	ENSG00000120802:98941351-98944157:target
APAF1	ENSG00000120868	chr12	+	99117417	99117542	99119192	99119318	99120950	99120969	ENSG00000120868:99117417-99117542:source	ENSG00000120868:99120951-99120969:target
GOLGA2P5	ENSG00000238105	chr12	-	100566889	100567437	100564999	100565038	100564715	100564765	ENSG00000238105:100564715-100564765:source	ENSG00000238105:100566890-100567437:target
CHPT1	ENSG00000111666	chr12	+	102108282	102108423	102108661	102108854	102110505	102110590	ENSG00000111666:102108282-102108423:source	ENSG00000111666:102110506-102110590:target
TXNRD1	ENSG00000198431	chr12	+	104714869	104715094	104719114	104719207	104720124	104720201	ENSG00000198431:104714869-104715094:source	ENSG00000198431:104720125-104720201:target
KIAA1033	ENSG00000136051	chr12	+	105501492	105501639	105504902	105505042	105507993	105508047	ENSG00000136051:105501492-105501639:source	ENSG00000136051:105507994-105508047:target
PRDM4	ENSG00000110851	chr12	-	108150608	108150742	108148605	108148637	108147701	108147886	ENSG00000110851:108147701-108147886:source	ENSG00000110851:108150609-108150742:target
UNG	ENSG00000076248	chr12	+	109539707	109539804	109540643	109540732	109541237	109541416	ENSG00000076248:109539707-109539804:source	ENSG00000076248:109541238-109541416:target
MMAB	ENSG00000139428	chr12	-	109998844	109998909	109996900	109996960	109992941	109994941	ENSG00000139428:109991542-109994941:source	ENSG00000139428:109998845-109998909:target
ATP2A2	ENSG00000174437	chr12	+	110781037	110781239	110781949	110782032	110782690	110783052	ENSG00000174437:110781037-110781239:source	ENSG00000174437:110782691-110783052:target
BRAP	ENSG00000089234	chr12	-	112110464	112111115	112103442	112103591	112098404	112098479	ENSG00000089234:112098404-112098479:source	ENSG00000089234:112110465-112111115:target
ACAD10	ENSG00000111271	chr12	+	112150302	112150461	112153624	112153766	112159474	112159794	ENSG00000111271:112150302-112150461:source	ENSG00000111271:112159475-112159794:target
ACAD10	ENSG00000111271	chr12	+	112185096	112185189	112185391	112185529	112186120	112186279	ENSG00000111271:112185096-112185189:source	ENSG00000111271:112186121-112186279:target
MAPKAPK5	ENSG00000089022	chr12	+	112303054	112303127	112303959	112304035	112305375	112305473	ENSG00000089022:112303054-112303127:source	ENSG00000089022:112305376-112305473:target
TRAFD1	ENSG00000135148	chr12	+	112568274	112568373	112570943	112571124	112572541	112572677	ENSG00000135148:112568274-112568373:source	ENSG00000135148:112572542-112572677:target
TRAFD1	ENSG00000135148	chr12	+	112572817	112572870	112577922	112578009	112578622	112579295	ENSG00000135148:112572817-112572870:source	ENSG00000135148:112578623-112579295:target
PTPN11	ENSG00000179295	chr12	+	112939948	112940060	112942498	112942600	112943628	112945628	ENSG00000179295:112939948-112940060:source	ENSG00000179295:112943629-112947717:target
TPCN1	ENSG00000186815	chr12	+	113731074	113731154	113731910	113732033	113733764	113735764	ENSG00000186815:113731074-113731154:source	ENSG00000186815:113733765-113736390:target
PLBD2	ENSG00000151176	chr12	+	113796371	113796695	113806920	113807014	113810453	113810612	ENSG00000151176:113796371-113796695:source	ENSG00000151176:113810454-113810612:target
RBM19	ENSG00000122965	chr12	-	114397669	114397708	114397016	114397209	114395587	114395855	ENSG00000122965:114395587-114395855:source	ENSG00000122965:114397670-114397708:target
TAOK3	ENSG00000135090	chr12	-	118590031	118590558	118589731	118589800	118588248	118588963	ENSG00000135090:118588248-118588963:source	ENSG00000135090:118590032-118590558:target
TAOK3	ENSG00000135090	chr12	-	118651821	118651976	118650718	118650800	118639101	118639268	ENSG00000135090:118639101-118639268:source	ENSG00000135090:118651822-118651976:target
SUDS3	ENSG00000111707	chr12	+	118821817	118821872	118823098	118823249	118823918	118823990	ENSG00000111707:118821817-118821872:source	ENSG00000111707:118823919-118823990:target
PRKAB1	ENSG00000111725	chr12	+	120111615	120111862	120112144	120112259	120114341	120114479	ENSG00000111725:120111615-120111862:source	ENSG00000111725:120114342-120114479:target
GCN1L1	ENSG00000089154	chr12	-	120582726	120582865	120582442	120582639	120582110	120582252	ENSG00000089154:120582110-120582252:source	ENSG00000089154:120582727-120582865:target
GCN1L1	ENSG00000089154	chr12	-	120587409	120587524	120585970	120586150	120584856	120585076	ENSG00000089154:120584856-120585076:source	ENSG00000089154:120587410-120587524:target
GCN1L1	ENSG00000089154	chr12	-	120591016	120591211	120588948	120589195	120587726	120587847	ENSG00000089154:120587726-120587847:source	ENSG00000089154:120591017-120591211:target
GATC	ENSG00000257218	chr12	+	120884380	120884632	120892735	120892833	120894878	120894982	ENSG00000257218:120884380-120884632:source	ENSG00000257218:120894879-120894982:target
KDM2B	ENSG00000089094	chr12	-	122016706	122016851	122013685	122013764	122012270	122012498	ENSG00000089094:122012270-122012498:source	ENSG00000089094:122016707-122016851:target
TMEM120B	ENSG00000188735	chr12	+	122211327	122211419	122212563	122212628	122212967	122213036	ENSG00000188735:122211327-122211419:source	ENSG00000188735:122212968-122213036:target
SETD1B	ENSG00000139718	chr12	+	122255705	122255810	122257309	122257801	122260395	122261655	ENSG00000139718:122255705-122255810:source	ENSG00000139718:122260396-122261655:target
CLIP1	ENSG00000130779	chr12	-	122812493	122812709	122803778	122803895	122801296	122801402	ENSG00000130779:122801296-122801402:source	ENSG00000130779:122812494-122812709:target
ZCCHC8	ENSG00000033030	chr12	-	122977261	122977336	122975481	122975600	122975009	122975114	ENSG00000033030:122975009-122975114:source	ENSG00000033030:122977262-122977336:target
KNTC1	ENSG00000184445	chr12	+	123057689	123057832	123058168	123058292	123058828	123058927	ENSG00000184445:123057689-123057832:source	ENSG00000184445:123058829-123058927:target
KNTC1	ENSG00000184445	chr12	+	123100017	123100073	123101953	123102048	123102889	123102944	ENSG00000184445:123100017-123100073:source	ENSG00000184445:123102890-123102944:target
KNTC1	ENSG00000184445	chr12	+	123107009	123107154	123109144	123109235	123110751	123110943	ENSG00000184445:123107009-123107154:source	ENSG00000184445:123110752-123110943:target
MPHOSPH9	ENSG00000051825	chr12	-	123699290	123699381	123694602	123694709	123687661	123687922	ENSG00000051825:123687661-123687922:source	ENSG00000051825:123699291-123699381:target
SBNO1	ENSG00000139697	chr12	-	123789128	123789266	123787370	123787447	123782525	123782718	ENSG00000139697:123782525-123782718:source	ENSG00000139697:123789129-123789266:target
SCARB1	ENSG00000073060	chr12	-	125284669	125284788	125279740	125279814	125271952	125272003	ENSG00000073060:125271952-125272003:source	ENSG00000073060:125284670-125284788:target
EP400	ENSG00000183495	chr12	+	132508322	132508486	132510190	132510349	132511981	132512076	ENSG00000183495:132508322-132508486:source	ENSG00000183495:132511982-132512076:target
GOLGA3	ENSG00000090615	chr12	-	133367801	133367879	133367373	133367464	133365609	133365876	ENSG00000090615:133365609-133365876:source	ENSG00000090615:133367802-133367879:target
ZNF26	ENSG00000198393	chr12	+	133583628	133583754	133584022	133584118	133586721	133588721	ENSG00000198393:133583628-133583754:source	ENSG00000198393:133586722-133589154:target
SYAP1	ENSG00000169895	chrX	+	16761824	16761963	16773067	16773216	16774785	16774844	ENSG00000169895:16761824-16761963:source	ENSG00000169895:16774786-16774844:target
SCML2	ENSG00000102098	chrX	-	18341978	18342213	18338451	18338540	18323092	18323335	ENSG00000102098:18323092-18323335:source	ENSG00000102098:18341979-18342213:target
PHKA2	ENSG00000044446	chrX	-	18942173	18942252	18938149	18938319	18936799	18936972	ENSG00000044446:18936799-18936972:source	ENSG00000044446:18942174-18942252:target
PHKA2	ENSG00000044446	chrX	-	18963195	18963276	18961827	18961926	18959647	18959793	ENSG00000044446:18959647-18959793:source	ENSG00000044446:18963196-18963276:target
SH3KBP1	ENSG00000147010	chrX	-	19568091	19568201	19564039	19564168	19560043	19560311	ENSG00000147010:19560043-19560311:source	ENSG00000147010:19568092-19568201:target
SH3KBP1	ENSG00000147010	chrX	-	19626055	19626163	19619617	19619768	19613067	19613118	ENSG00000147010:19613067-19613118:source	ENSG00000147010:19626056-19626163:target
EIF1AX	ENSG00000173674	chrX	-	20159742	20159962	20156656	20156740	20153856	20153959	ENSG00000173674:20153856-20153959:source	ENSG00000173674:20159743-20159962:target
SMS	ENSG00000102172	chrX	+	21958691	21958991	21985313	21985434	21990014	21990108	ENSG00000102172:21958691-21958991:source	ENSG00000102172:21990015-21990108:target
PRDX4	ENSG00000123131	chrX	+	23701788	23701822	23704118	23704164	23704401	23704516	ENSG00000123131:23701788-23701822:source	ENSG00000123131:23704402-23704516:target
APOO	ENSG00000184831	chrX	-	23897031	23897151	23892519	23892574	23886773	23886805	ENSG00000184831:23886773-23886805:source	ENSG00000184831:23897032-23897151:target
PDK3	ENSG00000067992	chrX	+	24545691	24545792	24546192	24546303	24549773	24549887	ENSG00000067992:24545691-24545792:source	ENSG00000067992:24549774-24549887:target
POLA1	ENSG00000101868	chrX	+	24766987	24767109	24793313	24793473	24828014	24828047	ENSG00000101868:24766987-24767109:source	ENSG00000101868:24828015-24828047:target
RPGR	ENSG00000156313	chrX	-	38160499	38160624	38158208	38158394	38156537	38156705	ENSG00000156313:38156537-38156705:source	ENSG00000156313:38160500-38160624:target
ATP6AP2	ENSG00000182220	chrX	+	40457933	40457986	40458187	40458270	40458843	40458993	ENSG00000182220:40457933-40457986:source	ENSG00000182220:40458844-40458993:target
CXorf38	ENSG00000185753	chrX	-	40496258	40496408	40495784	40495964	40489780	40490025	ENSG00000185753:40489780-40490025:source	ENSG00000185753:40496259-40496408:target
MED14	ENSG00000180182	chrX	-	40540009	40540162	40539115	40539385	40534473	40534613	ENSG00000180182:40534473-40534613:source	ENSG00000180182:40540010-40540162:target
MED14	ENSG00000180182	chrX	-	40560416	40560495	40556275	40556435	40551960	40552154	ENSG00000180182:40551960-40552154:source	ENSG00000180182:40560417-40560495:target
MED14	ENSG00000180182	chrX	-	40562695	40562821	40560416	40560495	40556276	40556435	ENSG00000180182:40556276-40556435:source	ENSG00000180182:40562696-40562821:target
USP9X	ENSG00000124486	chrX	+	41000546	41000684	41002543	41002696	41003774	41003879	ENSG00000124486:41000546-41000684:source	ENSG00000124486:41003775-41003879:target
USP9X	ENSG00000124486	chrX	+	41077625	41077850	41078354	41078484	41082469	41082659	ENSG00000124486:41077625-41077850:source	ENSG00000124486:41082470-41082659:target
DDX3X	ENSG00000215301	chrX	+	41202469	41202604	41202989	41203075	41203282	41203381	ENSG00000215301:41202469-41202604:source	ENSG00000215301:41203283-41203381:target
FUNDC1	ENSG00000069509	chrX	-	44397712	44397788	44386482	44386611	44382885	44383521	ENSG00000069509:44382885-44383521:source	ENSG00000069509:44397713-44397788:target
FUNDC1	ENSG00000069509	chrX	-	44401190	44401550	44397712	44397788	44386483	44386611	ENSG00000069509:44386483-44386611:source	ENSG00000069509:44401191-44401550:target
FTSJ1	ENSG00000068438	chrX	+	48341374	48341415	48341628	48341729	48344123	48344752	ENSG00000068438:48341374-48341415:source	ENSG00000068438:48344124-48344752:target
GPKOW	ENSG00000068394	chrX	-	48978971	48979126	48978747	48978872	48976058	48976167	ENSG00000068394:48976058-48976167:source	ENSG00000068394:48978972-48979126:target
CCDC22	ENSG00000101997	chrX	+	49098482	49098614	49099107	49099191	49099351	49099458	ENSG00000101997:49098482-49098614:source	ENSG00000101997:49099352-49099458:target
HUWE1	ENSG00000086758	chrX	-	53579271	53579402	53578957	53579034	53578227	53578441	ENSG00000086758:53578227-53578441:source	ENSG00000086758:53579272-53579402:target
HUWE1	ENSG00000086758	chrX	-	53586314	53586493	53585931	53586021	53585616	53585770	ENSG00000086758:53585616-53585770:source	ENSG00000086758:53586315-53586493:target
GNL3L	ENSG00000130119	chrX	+	54567706	54567822	54569387	54569471	54569639	54569775	ENSG00000130119:54567706-54567822:source	ENSG00000130119:54569640-54569775:target
GNL3L	ENSG00000130119	chrX	+	54569640	54569775	54570438	54570553	54570655	54570759	ENSG00000130119:54569640-54569775:source	ENSG00000130119:54570656-54570759:target
GNL3L	ENSG00000130119	chrX	+	54578001	54578175	54578264	54578407	54578724	54578861	ENSG00000130119:54578001-54578175:source	ENSG00000130119:54578725-54578861:target
LAS1L	ENSG00000001497	chrX	-	64754359	64754655	64753489	64753615	64752441	64752510	ENSG00000001497:64752441-64752510:source	ENSG00000001497:64754360-64754655:target
MSN	ENSG00000147065	chrX	+	64951700	64951846	64953045	64953142	64955128	64955292	ENSG00000147065:64951700-64951846:source	ENSG00000147065:64955129-64955292:target
ZMYM3	ENSG00000147130	chrX	-	70471027	70471100	70470281	70470576	70469876	70470053	ENSG00000147130:70469876-70470053:source	ENSG00000147130:70471028-70471100:target
OGT	ENSG00000147162	chrX	+	70779438	70779527	70781624	70781750	70782696	70782867	ENSG00000147162:70779438-70779527:source	ENSG00000147162:70782697-70782867:target
PHKA1	ENSG00000067177	chrX	-	71804098	71804152	71802247	71802448	71799025	71801025	ENSG00000067177:71798664-71801025:source	ENSG00000067177:71804099-71804152:target
ABCB7	ENSG00000131269	chrX	-	74332720	74332807	74318776	74318896	74296357	74296489	ENSG00000131269:74296357-74296489:source	ENSG00000131269:74332721-74332807:target
MAGT1	ENSG00000102158	chrX	-	77150805	77151090	77130924	77131094	77126305	77126422	ENSG00000102158:77126305-77126422:source	ENSG00000102158:77150806-77151090:target
APOOL	ENSG00000155008	chrX	+	84329004	84329117	84329279	84329397	84342595	84343069	ENSG00000155008:84329004-84329117:source	ENSG00000155008:84342596-84343069:target
CSTF2	ENSG00000101811	chrX	+	100083029	100083091	100085796	100085856	100086503	100086645	ENSG00000101811:100083029-100083091:source	ENSG00000101811:100086504-100086645:target
CENPI	ENSG00000102384	chrX	+	100387381	100387445	100391920	100392044	100395654	100396282	ENSG00000102384:100387381-100387445:source	ENSG00000102384:100395655-100396282:target
ARMCX3	ENSG00000102401	chrX	+	100878776	100878883	100879147	100879208	100879469	100879540	ENSG00000102401:100878776-100878883:source	ENSG00000102401:100879470-100879540:target
NXF3	ENSG00000147206	chrX	-	102347923	102348157	102339642	102339811	102339270	102339423	ENSG00000147206:102339270-102339423:source	ENSG00000147206:102347924-102348157:target
TMEM164	ENSG00000157600	chrX	+	109388026	109388104	109399889	109399939	109414647	109414748	ENSG00000157600:109388026-109388104:source	ENSG00000157600:109414648-109414748:target
PLS3	ENSG00000102024	chrX	+	114874616	114874815	114877624	114877820	114879340	114879419	ENSG00000102024:114874616-114874815:source	ENSG00000102024:114879341-114879419:target
WDR44	ENSG00000131725	chrX	+	117570665	117570787	117575330	117575522	117576206	117576308	ENSG00000131725:117570665-117570787:source	ENSG00000131725:117576207-117576308:target
WDR44	ENSG00000131725	chrX	+	117578323	117578457	117581022	117581077	117582855	117583924	ENSG00000131725:117578323-117578457:source	ENSG00000131725:117582856-117583924:target
PGRMC1	ENSG00000101856	chrX	+	118370216	118370654	118374271	118374427	118377113	118378429	ENSG00000101856:118370216-118370654:source	ENSG00000101856:118377114-118378429:target
CXorf56	ENSG00000018610	chrX	-	118694230	118694348	118679425	118679467	118678316	118678454	ENSG00000018610:118678316-118678454:source	ENSG00000018610:118694231-118694348:target
CUL4B	ENSG00000158290	chrX	-	119674224	119674417	119673122	119673227	119672515	119672625	ENSG00000158290:119672515-119672625:source	ENSG00000158290:119674225-119674417:target
THOC2	ENSG00000125676	chrX	-	122767803	122767921	122766711	122766891	122765539	122765703	ENSG00000125676:122765539-122765703:source	ENSG00000125676:122767804-122767921:target
THOC2	ENSG00000125676	chrX	-	122771893	122771974	122771052	122771153	122769930	122770026	ENSG00000125676:122769930-122770026:source	ENSG00000125676:122771894-122771974:target
STAG2	ENSG00000101972	chrX	+	123210182	123210321	123211806	123211908	123215229	123215378	ENSG00000101972:123210182-123210321:source	ENSG00000101972:123215230-123215378:target
STAG2	ENSG00000101972	chrX	+	123215230	123215378	123217270	123217399	123220396	123220620	ENSG00000101972:123215230-123215378:source	ENSG00000101972:123220397-123220620:target
SMARCA1	ENSG00000102038	chrX	-	128640056	128640188	128638710	128638779	128633709	128633818	ENSG00000102038:128633709-128633818:source	ENSG00000102038:128640057-128640188:target
SMARCA1	ENSG00000102038	chrX	-	128649663	128649764	128645780	128645960	128641918	128642073	ENSG00000102038:128641918-128642073:source	ENSG00000102038:128649664-128649764:target
SMARCA1	ENSG00000102038	chrX	-	128652337	128652424	128650307	128650474	128649871	128649971	ENSG00000102038:128649871-128649971:source	ENSG00000102038:128652338-128652424:target
UTP14A	ENSG00000156697	chrX	+	129042036	129042106	129042645	129042710	129044983	129045126	ENSG00000156697:129042036-129042106:source	ENSG00000156697:129044984-129045126:target
STK26	ENSG00000134602	chrX	+	131205076	131205245	131206295	131206389	131206840	131206903	ENSG00000134602:131205076-131205245:source	ENSG00000134602:131206841-131206903:target
GPC3	ENSG00000147257	chrX	-	132887508	132888203	132838232	132838301	132833923	132834056	ENSG00000147257:132833923-132834056:source	ENSG00000147257:132887509-132888203:target
DDX26B	ENSG00000165359	chrX	+	134685919	134686071	134690092	134690225	134703261	134703356	ENSG00000165359:134685919-134686071:source	ENSG00000165359:134703262-134703356:target
DDX26B	ENSG00000165359	chrX	+	134706740	134706958	134707503	134707612	134707863	134707987	ENSG00000165359:134706740-134706958:source	ENSG00000165359:134707864-134707987:target
MAP7D3	ENSG00000129680	chrX	-	135323318	135323436	135322540	135322645	135318403	135318498	ENSG00000129680:135318403-135318498:source	ENSG00000129680:135323319-135323436:target
HTATSF1	ENSG00000102241	chrX	+	135581757	135581937	135582316	135582364	135582822	135582977	ENSG00000102241:135581757-135581937:source	ENSG00000102241:135582823-135582977:target
ARHGEF6	ENSG00000129675	chrX	-	135772768	135772907	135770090	135770150	135767836	135767982	ENSG00000129675:135767836-135767982:source	ENSG00000129675:135772769-135772907:target
ATP11C	ENSG00000101974	chrX	-	138870350	138870502	138869331	138869403	138867385	138867458	ENSG00000101974:138867385-138867458:source	ENSG00000101974:138870351-138870502:target
FMR1	ENSG00000102081	chrX	+	147007058	147007151	147009839	147009911	147010176	147010325	ENSG00000102081:147007058-147007151:source	ENSG00000102081:147010177-147010325:target
HAUS7	ENSG00000213397	chrX	-	152734603	152734719	152730445	152730513	152728068	152728129	ENSG00000213397:152728068-152728129:source	ENSG00000213397:152734604-152734719:target
IDH3G	ENSG00000067829	chrX	-	153055166	153055279	153054568	153054655	153053530	153053590	ENSG00000067829:153053530-153053590:source	ENSG00000067829:153055167-153055279:target
HCFC1	ENSG00000172534	chrX	-	153224781	153224942	153224019	153224217	153223476	153223700	ENSG00000172534:153223476-153223700:source	ENSG00000172534:153224782-153224942:target
HCFC1	ENSG00000172534	chrX	-	153227672	153227757	153226992	153227099	153225686	153225865	ENSG00000172534:153225686-153225865:source	ENSG00000172534:153227673-153227757:target
PLXNA3	ENSG00000130827	chrX	+	153697722	153697825	153698030	153698127	153698319	153698510	ENSG00000130827:153697722-153697825:source	ENSG00000130827:153698320-153698510:target
HTT	ENSG00000197386	chr4	+	3149732	3149934	3156019	3156146	3158798	3158926	ENSG00000197386:3149732-3149934:source	ENSG00000197386:3158799-3158926:target
D4S234E	ENSG00000168824	chr4	+	4389331	4389485	4393201	4393318	4411299	4411410	ENSG00000168824:4389331-4389485:source	ENSG00000168824:4411300-4411410:target
JAKMIP1	ENSG00000152969	chr4	-	6058423	6058486	6056474	6056530	6055484	6055875	ENSG00000152969:6055484-6055875:source	ENSG00000152969:6058424-6058486:target
MAN2B2	ENSG00000013288	chr4	+	6590772	6590887	6592567	6592648	6594899	6595077	ENSG00000013288:6590772-6590887:source	ENSG00000013288:6594900-6595077:target
RAB28	ENSG00000157869	chr4	-	13485699	13485989	13484304	13484373	13481054	13481150	ENSG00000157869:13481054-13481150:source	ENSG00000157869:13485700-13485989:target
NCAPG	ENSG00000109805	chr4	+	17832620	17832739	17835921	17836146	17838781	17838963	ENSG00000109805:17832620-17832739:source	ENSG00000109805:17838782-17838963:target
ADGRA3	ENSG00000152990	chr4	-	22463359	22463431	22456488	22456560	22449063	22449134	ENSG00000152990:22449063-22449134:source	ENSG00000152990:22463360-22463431:target
ANAPC4	ENSG00000053900	chr4	+	25392533	25392637	25393482	25393550	25393959	25394043	ENSG00000053900:25392533-25392637:source	ENSG00000053900:25393960-25394043:target
ANAPC4	ENSG00000053900	chr4	+	25416774	25417162	25418046	25418220	25419237	25419361	ENSG00000053900:25416774-25417162:source	ENSG00000053900:25419238-25419361:target
PGM2	ENSG00000169299	chr4	+	37841688	37841881	37845984	37846174	37847253	37847351	ENSG00000169299:37841688-37841881:source	ENSG00000169299:37847254-37847351:target
TBC1D1	ENSG00000065882	chr4	+	38016130	38016594	38019014	38019074	38019974	38020064	ENSG00000065882:38016130-38016594:source	ENSG00000065882:38019975-38020064:target
WDR19	ENSG00000157796	chr4	+	39187346	39187437	39188158	39188224	39191275	39191401	ENSG00000157796:39187346-39187437:source	ENSG00000157796:39191276-39191401:target
RFC1	ENSG00000035928	chr4	-	39343964	39344087	39343106	39343285	39329144	39329376	ENSG00000035928:39329144-39329376:source	ENSG00000035928:39343965-39344087:target
SMIM14	ENSG00000163683	chr4	-	39606690	39606800	39574034	39574083	39558047	39558190	ENSG00000163683:39558047-39558190:source	ENSG00000163683:39606691-39606800:target
SMIM14	ENSG00000163683	chr4	-	39640358	39640710	39613585	39613730	39606691	39606800	ENSG00000163683:39606691-39606800:source	ENSG00000163683:39640359-39640710:target
SLC30A9	ENSG00000014824	chr4	+	42020128	42020187	42020405	42020522	42022432	42022792	ENSG00000014824:42020128-42020187:source	ENSG00000014824:42022433-42022792:target
SLC30A9	ENSG00000014824	chr4	+	42069102	42069209	42072542	42072708	42077673	42077803	ENSG00000014824:42069102-42069209:source	ENSG00000014824:42077674-42077803:target
FRYL	ENSG00000075539	chr4	-	48537673	48537844	48536561	48536702	48533173	48533370	ENSG00000075539:48533173-48533370:source	ENSG00000075539:48537674-48537844:target
DCUN1D4	ENSG00000109184	chr4	+	52729603	52729673	52729835	52729875	52740436	52740551	ENSG00000109184:52729603-52729673:source	ENSG00000109184:52740437-52740551:target
SCFD2	ENSG00000184178	chr4	-	53786891	53787037	53773623	53773758	53751914	53752033	ENSG00000184178:53751914-53752033:source	ENSG00000184178:53786892-53787037:target
FIP1L1	ENSG00000145216	chr4	+	54245392	54245431	54248444	54248502	54249939	54250043	ENSG00000145216:54245392-54245431:source	ENSG00000145216:54249940-54250043:target
PPAT	ENSG00000128059	chr4	-	57272660	57272867	57270145	57270284	57269455	57269567	ENSG00000128059:57269455-57269567:source	ENSG00000128059:57272661-57272867:target
SRP72	ENSG00000174780	chr4	+	57344758	57344815	57349304	57349436	57350901	57351030	ENSG00000174780:57344758-57344815:source	ENSG00000174780:57350902-57351030:target
REST	ENSG00000084093	chr4	+	57785953	57786036	57793780	57793830	57796006	57798006	ENSG00000084093:57785953-57786036:source	ENSG00000084093:57796007-57802010:target
POLR2B	ENSG00000047315	chr4	+	57891543	57891703	57893655	57893808	57896369	57896565	ENSG00000047315:57891543-57891703:source	ENSG00000047315:57896370-57896565:target
UBA6	ENSG00000033178	chr4	-	68499959	68500040	68499062	68499191	68497575	68497626	ENSG00000033178:68497575-68497626:source	ENSG00000033178:68499960-68500040:target
YTHDC1	ENSG00000083896	chr4	-	69199025	69199115	69198511	69198565	69197821	69197915	ENSG00000083896:69197821-69197915:source	ENSG00000083896:69199026-69199115:target
MOB1B	ENSG00000173542	chr4	+	71824591	71824757	71825620	71825743	71835647	71835741	ENSG00000173542:71824591-71824757:source	ENSG00000173542:71835648-71835741:target
ANKRD17	ENSG00000132466	chr4	-	74014529	74014767	74012957	74013149	74012481	74012590	ENSG00000132466:74012481-74012590:source	ENSG00000132466:74014530-74014767:target
PARM1	ENSG00000169116	chr4	+	75858305	75858580	75937634	75938360	75959092	75959171	ENSG00000169116:75858305-75858580:source	ENSG00000169116:75959093-75959171:target
USO1	ENSG00000138768	chr4	+	76731585	76731692	76733312	76733528	76734358	76735382	ENSG00000138768:76731585-76731692:source	ENSG00000138768:76734359-76735382:target
SDAD1	ENSG00000198301	chr4	-	76890448	76890552	76888429	76888487	76886917	76886975	ENSG00000198301:76886917-76886975:source	ENSG00000198301:76890449-76890552:target
AFF1	ENSG00000172493	chr4	+	88005272	88005316	88011135	88011222	88012944	88012981	ENSG00000172493:88005272-88005316:source	ENSG00000172493:88012945-88012981:target
HERC3	ENSG00000138641	chr4	+	89588528	89588639	89589042	89589232	89591010	89591174	ENSG00000138641:89588528-89588639:source	ENSG00000138641:89591011-89591174:target
SNCA	ENSG00000145335	chr4	-	90756697	90756846	90749293	90749335	90743003	90743539	ENSG00000145335:90743003-90743539:source	ENSG00000145335:90756698-90756846:target
SMARCAD1	ENSG00000163104	chr4	+	95162030	95162157	95169631	95169704	95170804	95170906	ENSG00000163104:95162030-95162157:source	ENSG00000163104:95170805-95170906:target
SMARCAD1	ENSG00000163104	chr4	+	95204272	95204454	95206110	95206220	95210623	95212443	ENSG00000163104:95204272-95204454:source	ENSG00000163104:95210624-95212443:target
PDLIM5	ENSG00000163110	chr4	+	95575611	95575791	95577968	95578062	95578577	95578698	ENSG00000163110:95575611-95575791:source	ENSG00000163110:95578578-95578698:target
PPP3CA	ENSG00000138814	chr4	-	102030110	102030235	102029230	102029318	102020768	102020879	ENSG00000138814:102020768-102020879:source	ENSG00000138814:102030111-102030235:target
NFKB1	ENSG00000109320	chr4	+	103533591	103533763	103534581	103534738	103537590	103538459	ENSG00000109320:103533591-103533763:source	ENSG00000109320:103537591-103538459:target
MANBA	ENSG00000109323	chr4	-	103585841	103586009	103580015	103580185	103578839	103579057	ENSG00000109323:103578839-103579057:source	ENSG00000109323:103585842-103586009:target
MANBA	ENSG00000109323	chr4	-	103610730	103610841	103600767	103600866	103595076	103595227	ENSG00000109323:103595076-103595227:source	ENSG00000109323:103610731-103610841:target
CENPE	ENSG00000138778	chr4	-	104057297	104057516	104054851	104055049	104053850	104054053	ENSG00000138778:104053850-104054053:source	ENSG00000138778:104057298-104057516:target
TBCK	ENSG00000145348	chr4	-	107133906	107133992	107115874	107115911	107114766	107114927	ENSG00000145348:107114766-107114927:source	ENSG00000145348:107133907-107133992:target
ALPK1	ENSG00000073331	chr4	+	113350305	113350409	113351603	113353737	113356303	113356457	ENSG00000073331:113350305-113350409:source	ENSG00000073331:113356304-113356457:target
METTL14	ENSG00000145388	chr4	+	119606523	119606755	119607704	119607854	119609077	119609166	ENSG00000145388:119606523-119606755:source	ENSG00000145388:119609078-119609166:target
ANXA5	ENSG00000164111	chr4	-	122618017	122618268	122617735	122617779	122607443	122607527	ENSG00000164111:122607443-122607527:source	ENSG00000164111:122618018-122618268:target
KIAA1109	ENSG00000138688	chr4	+	123274969	123275172	123275846	123275964	123276950	123277145	ENSG00000138688:123274969-123275172:source	ENSG00000138688:123276951-123277145:target
BBS12	ENSG00000181004	chr4	+	123653857	123654039	123655058	123655246	123663037	123665037	ENSG00000181004:123653857-123654039:source	ENSG00000181004:123663038-123666098:target
ANKRD50	ENSG00000151458	chr4	-	125633612	125633887	125631154	125632429	125599831	125600060	ENSG00000151458:125599831-125600060:source	ENSG00000151458:125633613-125633887:target
HSPA4L	ENSG00000164070	chr4	+	128716923	128717063	128719741	128719864	128722292	128722392	ENSG00000164070:128716923-128717063:source	ENSG00000164070:128722293-128722392:target
HSPA4L	ENSG00000164070	chr4	+	128722940	128723073	128724783	128725028	128725165	128725242	ENSG00000164070:128722940-128723073:source	ENSG00000164070:128725166-128725242:target
C4orf29	ENSG00000164074	chr4	+	128886461	128886761	128887108	128887211	128904093	128904202	ENSG00000164074:128886461-128886761:source	ENSG00000164074:128904094-128904202:target
LARP1B	ENSG00000138709	chr4	+	129012502	129012667	129013931	129014186	129019340	129019485	ENSG00000138709:129012502-129012667:source	ENSG00000138709:129019341-129019485:target
SCLT1	ENSG00000151466	chr4	-	129873923	129873995	129873497	129873687	129869651	129869725	ENSG00000151466:129869651-129869725:source	ENSG00000151466:129873924-129873995:target
NAA15	ENSG00000164134	chr4	+	140275180	140275252	140277642	140277737	140278539	140278709	ENSG00000164134:140275180-140275252:source	ENSG00000164134:140278540-140278709:target
USP38	ENSG00000170185	chr4	+	144124561	144124719	144125569	144125685	144127185	144127379	ENSG00000170185:144124561-144124719:source	ENSG00000170185:144127186-144127379:target
SMARCA5	ENSG00000153147	chr4	+	144466623	144466736	144467077	144467200	144467928	144468061	ENSG00000153147:144466623-144466736:source	ENSG00000153147:144467929-144468061:target
PRMT9	ENSG00000164169	chr4	-	148578942	148579126	148575002	148575717	148563938	148564091	ENSG00000164169:148563938-148564091:source	ENSG00000164169:148578943-148579126:target
LRBA	ENSG00000198589	chr4	-	151203601	151203798	151199004	151199156	151185594	151186964	ENSG00000198589:151185594-151186964:source	ENSG00000198589:151203602-151203798:target
TMEM192	ENSG00000170088	chr4	-	166021779	166022044	166009619	166009754	166006727	166006840	ENSG00000170088:166006727-166006840:source	ENSG00000170088:166021780-166022044:target
TMEM192	ENSG00000170088	chr4	-	166024101	166024248	166021779	166022044	166009620	166009754	ENSG00000170088:166009620-166009754:source	ENSG00000170088:166024102-166024248:target
KLHL2	ENSG00000109466	chr4	+	166220659	166220808	166226759	166226877	166231704	166231904	ENSG00000109466:166220659-166220808:source	ENSG00000109466:166231705-166231904:target
NEK1	ENSG00000137601	chr4	-	170458959	170459062	170429919	170430003	170429399	170429482	ENSG00000137601:170429399-170429482:source	ENSG00000137601:170458960-170459062:target
NEK1	ENSG00000137601	chr4	-	170482837	170482888	170482630	170482705	170477083	170477246	ENSG00000137601:170477083-170477246:source	ENSG00000137601:170482838-170482888:target
FBXO8	ENSG00000164117	chr4	-	175204560	175205415	175190204	175190318	175184070	175184251	ENSG00000164117:175184070-175184251:source	ENSG00000164117:175204561-175205415:target
NEIL3	ENSG00000109674	chr4	+	178230990	178231263	178243612	178243734	178256841	178256976	ENSG00000109674:178230990-178231263:source	ENSG00000109674:178256842-178256976:target
TRAPPC11	ENSG00000168538	chr4	+	184615757	184615876	184618655	184618721	184618831	184618988	ENSG00000168538:184615757-184615876:source	ENSG00000168538:184618832-184618988:target
IRF2	ENSG00000168310	chr4	-	185350131	185350224	185349827	185349951	185340623	185340722	ENSG00000168310:185340623-185340722:source	ENSG00000168310:185350132-185350224:target
ACSL1	ENSG00000151726	chr4	-	185705080	185705145	185701485	185701587	185698038	185698137	ENSG00000151726:185698038-185698137:source	ENSG00000151726:185705081-185705145:target
ACSL1	ENSG00000151726	chr4	-	185709770	185709885	185709532	185709667	185705081	185705145	ENSG00000151726:185705081-185705145:source	ENSG00000151726:185709771-185709885:target
ASAP2	ENSG00000151693	chr2	+	9419446	9419518	9427132	9427241	9437428	9437574	ENSG00000151693:9419446-9419518:source	ENSG00000151693:9437429-9437574:target
ADAM17	ENSG00000151694	chr2	-	9645294	9645494	9642301	9642405	9637243	9637377	ENSG00000151694:9637243-9637377:source	ENSG00000151694:9645295-9645494:target
NOL10	ENSG00000115761	chr2	-	10822096	10822195	10815919	10815997	10813448	10813683	ENSG00000115761:10813448-10813683:source	ENSG00000115761:10822097-10822195:target
LPIN1	ENSG00000134324	chr2	+	11928513	11928582	11931833	11931911	11932039	11932475	ENSG00000134324:11928513-11928582:source	ENSG00000134324:11932040-11932475:target
LPIN1	ENSG00000134324	chr2	+	11935534	11935613	11938149	11938268	11943032	11943159	ENSG00000134324:11935534-11935613:source	ENSG00000134324:11943033-11943159:target
NBAS	ENSG00000151779	chr2	-	15415607	15415942	15378591	15378810	15374669	15374871	ENSG00000151779:15374669-15374871:source	ENSG00000151779:15415608-15415942:target
NBAS	ENSG00000151779	chr2	-	15432660	15432890	15427196	15427307	15416975	15417225	ENSG00000151779:15416975-15417225:source	ENSG00000151779:15432661-15432890:target
NBAS	ENSG00000151779	chr2	-	15506703	15506817	15503086	15503179	15496427	15496540	ENSG00000151779:15496427-15496540:source	ENSG00000151779:15506704-15506817:target
SMC6	ENSG00000163029	chr2	-	17902206	17902305	17899343	17899490	17898355	17898443	ENSG00000163029:17898355-17898443:source	ENSG00000163029:17902207-17902305:target
GEN1	ENSG00000178295	chr2	+	17947846	17947956	17948323	17948498	17950004	17950078	ENSG00000178295:17947846-17947956:source	ENSG00000178295:17950005-17950078:target
PUM2	ENSG00000055917	chr2	-	20454623	20454745	20453582	20453775	20449477	20451477	ENSG00000055917:20448452-20451477:source	ENSG00000055917:20454624-20454745:target
PUM2	ENSG00000055917	chr2	-	20454976	20455102	20454623	20454745	20453583	20453775	ENSG00000055917:20453583-20453775:source	ENSG00000055917:20454977-20455102:target
PUM2	ENSG00000055917	chr2	-	20494136	20494279	20490412	20490551	20483104	20483247	ENSG00000055917:20483104-20483247:source	ENSG00000055917:20494137-20494279:target
ATAD2B	ENSG00000119778	chr2	-	24107634	24107743	24106463	24106505	24103509	24103625	ENSG00000119778:24103509-24103625:source	ENSG00000119778:24107635-24107743:target
ITSN2	ENSG00000198399	chr2	-	24483974	24484119	24480756	24480962	24477236	24477300	ENSG00000198399:24477236-24477300:source	ENSG00000198399:24483975-24484119:target
DNMT3A	ENSG00000119772	chr2	-	25523007	25523112	25513782	25513975	25504321	25505580	ENSG00000119772:25504321-25505580:source	ENSG00000119772:25523008-25523112:target
HADHB	ENSG00000138029	chr2	+	26486248	26486347	26492820	26492865	26496518	26496618	ENSG00000138029:26486248-26486347:source	ENSG00000138029:26496519-26496618:target
CAD	ENSG00000084774	chr2	+	27444086	27444215	27445061	27445204	27445386	27445528	ENSG00000084774:27444086-27444215:source	ENSG00000084774:27445387-27445528:target
CAD	ENSG00000084774	chr2	+	27445387	27445528	27445733	27445905	27446430	27446616	ENSG00000084774:27445387-27445528:source	ENSG00000084774:27446431-27446616:target
SNX17	ENSG00000115234	chr2	+	27597213	27597300	27597555	27597625	27597927	27598020	ENSG00000115234:27597213-27597300:source	ENSG00000115234:27597928-27598020:target
SNX17	ENSG00000115234	chr2	+	27597556	27597625	27597927	27598020	27598372	27598585	ENSG00000115234:27597556-27597625:source	ENSG00000115234:27598373-27598585:target
SLC4A1AP	ENSG00000163798	chr2	+	27890135	27890257	27891503	27891617	27891709	27891770	ENSG00000163798:27890135-27890257:source	ENSG00000163798:27891710-27891770:target
SLC4A1AP	ENSG00000163798	chr2	+	27900605	27900791	27905114	27905226	27907903	27908144	ENSG00000163798:27900605-27900791:source	ENSG00000163798:27907904-27908144:target
SPAST	ENSG00000021574	chr2	+	32368405	32368484	32370005	32370076	32372286	32372327	ENSG00000021574:32368405-32368484:source	ENSG00000021574:32372287-32372327:target
TTC27	ENSG00000018699	chr2	+	33007693	33007745	33012050	33012216	33036090	33036288	ENSG00000018699:33007693-33007745:source	ENSG00000018699:33036091-33036288:target
LTBP1	ENSG00000049323	chr2	+	33505106	33505225	33518226	33518349	33525517	33525640	ENSG00000049323:33505106-33505225:source	ENSG00000049323:33525518-33525640:target
EIF2AK2	ENSG00000055332	chr2	-	37362626	37362689	37353431	37353554	37349649	37349807	ENSG00000055332:37349649-37349807:source	ENSG00000055332:37362627-37362689:target
EML4	ENSG00000143924	chr2	+	42396490	42396776	42435068	42435222	42472644	42472828	ENSG00000143924:42396490-42396776:source	ENSG00000143924:42472645-42472828:target
EML4	ENSG00000143924	chr2	+	42491846	42491871	42492058	42492091	42507989	42508113	ENSG00000143924:42491846-42491871:source	ENSG00000143924:42507990-42508113:target
DYNC2LI1	ENSG00000138036	chr2	+	44010659	44010693	44014319	44014389	44016771	44016860	ENSG00000138036:44010659-44010693:source	ENSG00000138036:44016772-44016860:target
LRPPRC	ENSG00000138095	chr2	-	44121683	44121768	44117361	44117501	44116873	44117015	ENSG00000138095:44116873-44117015:source	ENSG00000138095:44121684-44121768:target
LRPPRC	ENSG00000138095	chr2	-	44175260	44175338	44174869	44174914	44174396	44174509	ENSG00000138095:44174396-44174509:source	ENSG00000138095:44175261-44175338:target
PREPL	ENSG00000138078	chr2	-	44566285	44566502	44565489	44565675	44559598	44559795	ENSG00000138078:44559598-44559795:source	ENSG00000138078:44566286-44566502:target
CALM2	ENSG00000143933	chr2	-	47389657	47391486	47389424	47389531	47388862	47388997	ENSG00000143933:47388862-47388997:source	ENSG00000143933:47389658-47391486:target
FBXO11	ENSG00000138081	chr2	-	48049356	48049442	48047500	48047595	48046095	48046217	ENSG00000138081:48046095-48046217:source	ENSG00000138081:48049357-48049442:target
PPP1R21	ENSG00000162869	chr2	+	48718157	48718309	48722817	48722910	48725631	48725874	ENSG00000162869:48718157-48718309:source	ENSG00000162869:48725632-48725874:target
ERLEC1	ENSG00000068912	chr2	+	54014181	54014509	54015719	54015842	54021481	54021586	ENSG00000068912:54014181-54014509:source	ENSG00000068912:54021482-54021586:target
ERLEC1	ENSG00000068912	chr2	+	54024652	54024729	54024868	54024932	54026183	54026218	ENSG00000068912:54024652-54024729:source	ENSG00000068912:54026184-54026218:target
ERLEC1	ENSG00000068912	chr2	+	54026184	54026218	54028533	54028757	54028849	54028979	ENSG00000068912:54026184-54026218:source	ENSG00000068912:54028850-54028979:target
ERLEC1	ENSG00000068912	chr2	+	54040086	54040210	54041679	54041757	54041996	54042072	ENSG00000068912:54040086-54040210:source	ENSG00000068912:54041997-54042072:target
PSME4	ENSG00000068878	chr2	-	54153095	54153160	54152675	54152826	54150458	54150556	ENSG00000068878:54150458-54150556:source	ENSG00000068878:54153096-54153160:target
PSME4	ENSG00000068878	chr2	-	54175557	54175674	54169295	54169361	54167093	54167137	ENSG00000068878:54167093-54167137:source	ENSG00000068878:54175558-54175674:target
CCDC88A	ENSG00000115355	chr2	-	55555429	55555571	55549663	55549828	55545979	55546140	ENSG00000115355:55545979-55546140:source	ENSG00000115355:55555430-55555571:target
PNPT1	ENSG00000138035	chr2	-	55907989	55908053	55907846	55907894	55906817	55906930	ENSG00000138035:55906817-55906930:source	ENSG00000138035:55907990-55908053:target
PAPOLG	ENSG00000115421	chr2	+	61022099	61022155	61022424	61022471	61024196	61026196	ENSG00000115421:61022099-61022155:source	ENSG00000115421:61024197-61029220:target
USP34	ENSG00000115464	chr2	-	61463160	61463208	61462979	61463045	61459587	61459667	ENSG00000115464:61459587-61459667:source	ENSG00000115464:61463161-61463208:target
USP34	ENSG00000115464	chr2	-	61515811	61516012	61512009	61512092	61510544	61510584	ENSG00000115464:61510544-61510584:source	ENSG00000115464:61515812-61516012:target
USP34	ENSG00000115464	chr2	-	61546307	61546462	61544788	61544902	61542010	61542109	ENSG00000115464:61542010-61542109:source	ENSG00000115464:61546308-61546462:target
USP34	ENSG00000115464	chr2	-	61575004	61575163	61573391	61573482	61570950	61571164	ENSG00000115464:61570950-61571164:source	ENSG00000115464:61575005-61575163:target
FAM161A	ENSG00000170264	chr2	-	62080993	62081278	62073893	62074131	62069257	62069495	ENSG00000170264:62069257-62069495:source	ENSG00000170264:62080994-62081278:target
CCT4	ENSG00000115484	chr2	-	62104054	62104187	62103229	62103369	62100332	62100428	ENSG00000115484:62100332-62100428:source	ENSG00000115484:62104055-62104187:target
VPS54	ENSG00000143952	chr2	-	64169598	64169695	64160806	64161147	64148340	64148469	ENSG00000143952:64148340-64148469:source	ENSG00000143952:64169599-64169695:target
PELI1	ENSG00000197329	chr2	-	64371214	64371588	64370451	64370660	64335374	64335513	ENSG00000197329:64335374-64335513:source	ENSG00000197329:64371215-64371588:target
SLC1A4	ENSG00000115902	chr2	+	65226624	65228624	65231086	65231149	65237730	65237897	ENSG00000115902:65226582-65228624:source	ENSG00000115902:65237731-65237897:target
ACTR2	ENSG00000138071	chr2	+	65482679	65482828	65488380	65488526	65492176	65492501	ENSG00000138071:65482679-65482828:source	ENSG00000138071:65492177-65492501:target
PNO1	ENSG00000115946	chr2	+	68385512	68385661	68388346	68388494	68388814	68388898	ENSG00000115946:68385512-68385661:source	ENSG00000115946:68388815-68388898:target
GFPT1	ENSG00000198380	chr2	-	69556428	69556556	69555402	69555570	69554046	69554207	ENSG00000198380:69554046-69554207:source	ENSG00000198380:69556429-69556556:target
GFPT1	ENSG00000198380	chr2	-	69581620	69581700	69581390	69581444	69577210	69577315	ENSG00000198380:69577210-69577315:source	ENSG00000198380:69581621-69581700:target
GFPT1	ENSG00000198380	chr2	-	69601137	69601245	69598441	69598604	69597133	69597240	ENSG00000198380:69597133-69597240:source	ENSG00000198380:69601138-69601245:target
EXOC6B	ENSG00000144036	chr2	-	73052926	73053170	72968432	72968598	72960200	72960247	ENSG00000144036:72960200-72960247:source	ENSG00000144036:73052927-73053170:target
PRADC1	ENSG00000135617	chr2	-	73456588	73456698	73455922	73456090	73455134	73455702	ENSG00000135617:73455134-73455702:source	ENSG00000135617:73456589-73456698:target
MTHFD2	ENSG00000065911	chr2	+	74438326	74438418	74438867	74438993	74441205	74443205	ENSG00000065911:74438326-74438418:source	ENSG00000065911:74441206-74444692:target
POLE4	ENSG00000115350	chr2	+	75186238	75186552	75186832	75186883	75187231	75187363	ENSG00000115350:75186238-75186552:source	ENSG00000115350:75187232-75187363:target
GCFC2	ENSG00000005436	chr2	-	75921366	75921605	75919102	75919226	75917614	75917845	ENSG00000005436:75917614-75917845:source	ENSG00000005436:75921367-75921605:target
SUCLG1	ENSG00000163541	chr2	-	84676772	84676876	84676052	84676071	84670345	84670524	ENSG00000163541:84670345-84670524:source	ENSG00000163541:84676773-84676876:target
CAPG	ENSG00000042493	chr2	-	85625142	85625475	85623102	85623133	85622661	85622749	ENSG00000042493:85622661-85622749:source	ENSG00000042493:85625143-85625475:target
POLR1A	ENSG00000068654	chr2	-	86267514	86267682	86267120	86267323	86266448	86266585	ENSG00000068654:86266448-86266585:source	ENSG00000068654:86267515-86267682:target
POLR1A	ENSG00000068654	chr2	-	86304981	86305104	86302152	86302383	86297141	86297395	ENSG00000068654:86297141-86297395:source	ENSG00000068654:86304982-86305104:target
POLR1A	ENSG00000068654	chr2	-	86316944	86317052	86315907	86315993	86315689	86315792	ENSG00000068654:86315689-86315792:source	ENSG00000068654:86316945-86317052:target
MRPL35	ENSG00000132313	chr2	+	86433229	86433418	86434305	86434450	86437602	86438168	ENSG00000132313:86433229-86433418:source	ENSG00000132313:86437603-86438168:target
RPIA	ENSG00000153574	chr2	+	89034069	89034133	89034719	89034816	89035185	89035254	ENSG00000153574:89034069-89034133:source	ENSG00000153574:89035186-89035254:target
RPIA	ENSG00000153574	chr2	+	89036052	89036193	89037493	89037593	89049497	89050452	ENSG00000153574:89036052-89036193:source	ENSG00000153574:89049498-89050452:target
ACTR1B	ENSG00000115073	chr2	-	98280305	98280570	98278344	98278409	98276653	98277109	ENSG00000115073:98276653-98277109:source	ENSG00000115073:98280306-98280570:target
TMEM131	ENSG00000075568	chr2	-	98392305	98392481	98388759	98388887	98382941	98383065	ENSG00000075568:98382941-98383065:source	ENSG00000075568:98392306-98392481:target
TMEM131	ENSG00000075568	chr2	-	98449827	98449889	98435075	98435184	98431662	98431770	ENSG00000075568:98431662-98431770:source	ENSG00000075568:98449828-98449889:target
MRPL30	ENSG00000185414	chr2	+	99802639	99802717	99803381	99803481	99804639	99804720	ENSG00000185414:99802639-99802717:source	ENSG00000185414:99804640-99804720:target
EIF5B	ENSG00000158417	chr2	+	99953816	99954052	99970499	99970536	99976698	99976824	ENSG00000158417:99953816-99954052:source	ENSG00000158417:99976699-99976824:target
C2orf49	ENSG00000135974	chr2	+	105956040	105956206	105958001	105958158	105959304	105959431	ENSG00000135974:105956040-105956206:source	ENSG00000135974:105959305-105959431:target
GCC2	ENSG00000135968	chr2	+	109066089	109066145	109067483	109067568	109068854	109068922	ENSG00000135968:109066089-109066145:source	ENSG00000135968:109068855-109068922:target
GCC2	ENSG00000135968	chr2	+	109068855	109068922	109079043	109079141	109085435	109085540	ENSG00000135968:109068855-109068922:source	ENSG00000135968:109085436-109085540:target
ANAPC1	ENSG00000153107	chr2	-	112566523	112566758	112563378	112563470	112561282	112561416	ENSG00000153107:112561282-112561416:source	ENSG00000153107:112566524-112566758:target
ANAPC1	ENSG00000153107	chr2	-	112636386	112636548	112631189	112631241	112630377	112630985	ENSG00000153107:112630377-112630985:source	ENSG00000153107:112636387-112636548:target
POLR1B	ENSG00000125630	chr2	+	113330219	113330335	113331138	113331392	113332423	113334423	ENSG00000125630:113330219-113330335:source	ENSG00000125630:113332424-113334635:target
ACTR3	ENSG00000115091	chr2	+	114647537	114647900	114670748	114670804	114674460	114674585	ENSG00000115091:114647537-114647900:source	ENSG00000115091:114674461-114674585:target
CLASP1	ENSG00000074054	chr2	-	122144697	122144804	122139783	122139900	122135075	122135225	ENSG00000074054:122135075-122135225:source	ENSG00000074054:122144698-122144804:target
CLASP1	ENSG00000074054	chr2	-	122182714	122182882	122176197	122176305	122168430	122168545	ENSG00000074054:122168430-122168545:source	ENSG00000074054:122182715-122182882:target
BIN1	ENSG00000136717	chr2	-	127819690	127819773	127818171	127818216	127816587	127816731	ENSG00000136717:127816587-127816731:source	ENSG00000136717:127819691-127819773:target
ERCC3	ENSG00000163161	chr2	-	128036748	128036951	128031107	128031297	128030441	128030537	ENSG00000163161:128030441-128030537:source	ENSG00000163161:128036749-128036951:target
MGAT5	ENSG00000152127	chr2	+	135095830	135095991	135099160	135099330	135102500	135102635	ENSG00000152127:135095830-135095991:source	ENSG00000152127:135102501-135102635:target
MGAT5	ENSG00000152127	chr2	+	135170440	135170586	135180373	135180490	135185935	135186010	ENSG00000152127:135170440-135170586:source	ENSG00000152127:135185936-135186010:target
R3HDM1	ENSG00000048991	chr2	+	136467003	136467106	136467628	136467801	136473119	136473264	ENSG00000048991:136467003-136467106:source	ENSG00000048991:136473120-136473264:target
MMADHC	ENSG00000168288	chr2	-	150432224	150432355	150428743	150428845	150427595	150427685	ENSG00000168288:150427595-150427685:source	ENSG00000168288:150432225-150432355:target
MMADHC	ENSG00000168288	chr2	-	150438640	150438785	150435944	150436162	150432951	150433056	ENSG00000168288:150432951-150433056:source	ENSG00000168288:150438641-150438785:target
RIF1	ENSG00000080345	chr2	+	152289591	152289742	152291976	152292094	152293340	152293517	ENSG00000080345:152289591-152289742:source	ENSG00000080345:152293341-152293517:target
RIF1	ENSG00000080345	chr2	+	152325155	152325270	152325567	152325621	152326224	152326378	ENSG00000080345:152325155-152325270:source	ENSG00000080345:152326225-152326378:target
FMNL2	ENSG00000157827	chr2	+	153415254	153415337	153417396	153417549	153431649	153431758	ENSG00000157827:153415254-153415337:source	ENSG00000157827:153431650-153431758:target
PKP4	ENSG00000144283	chr2	+	159526232	159526427	159530188	159530273	159530394	159530512	ENSG00000144283:159526232-159526427:source	ENSG00000144283:159530395-159530512:target
2017-03-07	ENSG00000136536	chr2	+	160619391	160619504	160621136	160621185	160623794	160625794	ENSG00000136536:160619391-160619504:source	ENSG00000136536:160623795-160627538:target
STK39	ENSG00000198648	chr2	-	168997158	168997268	168996798	168996900	168994598	168994731	ENSG00000198648:168994598-168994731:source	ENSG00000198648:168997159-168997268:target
CERS6	ENSG00000172292	chr2	+	169622102	169622258	169622831	169622855	169626019	169628019	ENSG00000172292:169622102-169622258:source	ENSG00000172292:169626020-169631644:target
SPC25	ENSG00000152253	chr2	-	169732581	169732686	169730094	169730193	169726933	169728065	ENSG00000152253:169726933-169728065:source	ENSG00000152253:169732582-169732686:target
SPC25	ENSG00000152253	chr2	-	169745735	169745803	169741357	169741417	169733748	169733894	ENSG00000152253:169733748-169733894:source	ENSG00000152253:169745736-169745803:target
PPIG	ENSG00000138398	chr2	+	170462613	170462656	170463613	170463658	170465180	170465268	ENSG00000138398:170462613-170462656:source	ENSG00000138398:170465181-170465268:target
PPIG	ENSG00000138398	chr2	+	170463614	170463658	170465180	170465268	170470973	170471003	ENSG00000138398:170463614-170463658:source	ENSG00000138398:170470974-170471003:target
METTL8	ENSG00000123600	chr2	-	172248552	172248707	172216931	172217023	172195841	172196064	ENSG00000123600:172195841-172196064:source	ENSG00000123600:172248553-172248707:target
ITGA6	ENSG00000091409	chr2	+	173335702	173335833	173337501	173337618	173338782	173338993	ENSG00000091409:173335702-173335833:source	ENSG00000091409:173338783-173338993:target
ATF2	ENSG00000115966	chr2	-	175982978	175983097	175982717	175982846	175978971	175979596	ENSG00000115966:175978971-175979596:source	ENSG00000115966:175982979-175983097:target
MTX2	ENSG00000128654	chr2	+	177194029	177194154	177195311	177195388	177202220	177202753	ENSG00000128654:177194029-177194154:source	ENSG00000128654:177202221-177202753:target
PLEKHA3	ENSG00000116095	chr2	+	179365788	179365903	179367062	179367210	179368486	179370486	ENSG00000116095:179365788-179365903:source	ENSG00000116095:179368487-179381189:target
PPP1R1C	ENSG00000150722	chr2	+	182818968	182819361	182826860	182826923	182839945	182839991	ENSG00000150722:182818968-182819361:source	ENSG00000150722:182839946-182839991:target
DNAJC10	ENSG00000077232	chr2	+	183623887	183624034	183627408	183627528	183640042	183640147	ENSG00000077232:183623887-183624034:source	ENSG00000077232:183640043-183640147:target
NCKAP1	ENSG00000061676	chr2	-	183902719	183903586	183889705	183889723	183888534	183888644	ENSG00000061676:183888534-183888644:source	ENSG00000061676:183902720-183903586:target
ZC3H15	ENSG00000065548	chr2	+	187371440	187371563	187372121	187372201	187373269	187374090	ENSG00000065548:187371440-187371563:source	ENSG00000065548:187373270-187374090:target
GTF3C3	ENSG00000119041	chr2	-	197662520	197662632	197661432	197661554	197657675	197657876	ENSG00000119041:197657675-197657876:source	ENSG00000119041:197662521-197662632:target
MOB4	ENSG00000115540	chr2	+	198405075	198405161	198413059	198413139	198414998	198415110	ENSG00000115540:198405075-198405161:source	ENSG00000115540:198414999-198415110:target
ORC2	ENSG00000115942	chr2	-	201824114	201824163	201822752	201822856	201822124	201822267	ENSG00000115942:201822124-201822267:source	ENSG00000115942:201824115-201824163:target
STRADB	ENSG00000082146	chr2	+	202319469	202319575	202322101	202322173	202323506	202323587	ENSG00000082146:202319469-202319575:source	ENSG00000082146:202323507-202323587:target
NOP58	ENSG00000055044	chr2	+	203157500	203157626	203160396	203160560	203162101	203162236	ENSG00000055044:203157500-203157626:source	ENSG00000055044:203162102-203162236:target
CARF	ENSG00000138380	chr2	+	203834642	203834785	203835611	203835759	203836227	203836461	ENSG00000138380:203834642-203834785:source	ENSG00000138380:203836228-203836461:target
PLEKHM3	ENSG00000178385	chr2	-	208795649	208795843	208794620	208794664	208773238	208773301	ENSG00000178385:208773238-208773301:source	ENSG00000178385:208795650-208795843:target
PIKFYVE	ENSG00000115020	chr2	+	209153453	209153542	209163364	209163503	209165660	209165818	ENSG00000115020:209153453-209153542:source	ENSG00000115020:209165661-209165818:target
PIKFYVE	ENSG00000115020	chr2	+	209204735	209204855	209207277	209207373	209209834	209209918	ENSG00000115020:209204735-209204855:source	ENSG00000115020:209209835-209209918:target
SLC23A3	ENSG00000213901	chr2	-	220011401	220011460	219959995	219960077	219942811	219942928	ENSG00000213901:219942811-219942928:source	ENSG00000213901:220011402-220011460:target
CNPPD1	ENSG00000115649	chr2	-	220039499	220039628	220038867	220038929	220038072	220038189	ENSG00000115649:220038072-220038189:source	ENSG00000115649:220039500-220039628:target
TUBA4A	ENSG00000127824	chr2	-	220118577	220118754	220116729	220116952	220116261	220116435	ENSG00000127824:220116261-220116435:source	ENSG00000127824:220118578-220118754:target
DOCK10	ENSG00000135905	chr2	-	225695257	225695329	225688217	225688364	225684163	225684246	ENSG00000135905:225684163-225684246:source	ENSG00000135905:225695258-225695329:target
TRIP12	ENSG00000153827	chr2	-	230643148	230643303	230642030	230642195	230638277	230638977	ENSG00000153827:230638277-230638977:source	ENSG00000153827:230643149-230643303:target
SP100	ENSG00000067066	chr2	+	231339109	231339162	231358506	231358626	231359130	231359175	ENSG00000067066:231339109-231339162:source	ENSG00000067066:231359131-231359175:target
DGKD	ENSG00000077044	chr2	+	234360610	234360706	234363002	234363110	234363408	234363519	ENSG00000077044:234360610-234360706:source	ENSG00000077044:234363409-234363519:target
USP40	ENSG00000085982	chr2	-	234398010	234398286	234396884	234396950	234394413	234394623	ENSG00000085982:234394413-234394623:source	ENSG00000085982:234398011-234398286:target
COPS8	ENSG00000198612	chr2	+	237993955	237994685	237995374	237995439	237995769	237995840	ENSG00000198612:237993955-237994685:source	ENSG00000198612:237995770-237995840:target
COPS8	ENSG00000198612	chr2	+	237995770	237995840	237996106	237996206	237997247	237997296	ENSG00000198612:237995770-237995840:source	ENSG00000198612:237997248-237997296:target
KANK1	ENSG00000107104	chr9	+	740792	740934	742204	742405	744490	744589	ENSG00000107104:740792-740934:source	ENSG00000107104:744491-744589:target
SMARCA2	ENSG00000080503	chr9	+	2110254	2110417	2115821	2116049	2119457	2119535	ENSG00000080503:2110254-2110417:source	ENSG00000080503:2119458-2119535:target
VLDLR	ENSG00000147852	chr9	+	2639859	2639981	2641376	2641499	2643159	2643531	ENSG00000147852:2639859-2639981:source	ENSG00000147852:2643160-2643531:target
KIAA0020	ENSG00000080608	chr9	-	2837179	2837401	2835292	2835412	2834031	2834166	ENSG00000080608:2834031-2834166:source	ENSG00000080608:2837180-2837401:target
RIC1	ENSG00000107036	chr9	+	5732388	5732479	5738449	5738538	5742868	5743013	ENSG00000107036:5732388-5732479:source	ENSG00000107036:5742869-5743013:target
KIAA2026	ENSG00000183354	chr9	-	6007194	6007901	5988344	5988545	5968177	5969436	ENSG00000183354:5968177-5969436:source	ENSG00000183354:6007195-6007901:target
PTPRD	ENSG00000153707	chr9	-	8449724	8449845	8437197	8437239	8436592	8436689	ENSG00000153707:8436592-8436689:source	ENSG00000153707:8449725-8449845:target
SNAPC3	ENSG00000164975	chr9	+	15447093	15447242	15451317	15451400	15453038	15453575	ENSG00000164975:15447093-15447242:source	ENSG00000164975:15453039-15453575:target
PSIP1	ENSG00000164985	chr9	-	15489983	15490122	15489267	15489438	15486825	15486929	ENSG00000164985:15486825-15486929:source	ENSG00000164985:15489984-15490122:target
DENND4C	ENSG00000137145	chr9	+	19316619	19316837	19324359	19324505	19325936	19325972	ENSG00000137145:19316619-19316837:source	ENSG00000137145:19325937-19325972:target
HACD4	ENSG00000188921	chr9	-	21026594	21026744	21017807	21017909	21015136	21016009	ENSG00000188921:21015136-21016009:source	ENSG00000188921:21026595-21026744:target
PLAA	ENSG00000137055	chr9	-	26935010	26935204	26928305	26928406	26928098	26928218	ENSG00000137055:26928098-26928218:source	ENSG00000137055:26935011-26935204:target
TOPORS	ENSG00000197579	chr9	-	32552431	32552551	32550771	32550966	32542324	32544324	ENSG00000197579:32540542-32544324:source	ENSG00000197579:32552432-32552551:target
SMU1	ENSG00000122692	chr9	-	33056110	33056237	33053120	33053288	33048104	33048256	ENSG00000122692:33048104-33048256:source	ENSG00000122692:33056111-33056237:target
CHMP5	ENSG00000086065	chr9	+	33267851	33267897	33270620	33270714	33271149	33271221	ENSG00000086065:33267851-33267897:source	ENSG00000086065:33271150-33271221:target
NFX1	ENSG00000086102	chr9	+	33318908	33319125	33328578	33328676	33332469	33332655	ENSG00000086102:33318908-33319125:source	ENSG00000086102:33332470-33332655:target
NOL6	ENSG00000165271	chr9	-	33466305	33466423	33466068	33466223	33465732	33465895	ENSG00000165271:33465732-33465895:source	ENSG00000165271:33466306-33466423:target
UBAP1	ENSG00000165006	chr9	+	34241183	34242106	34249776	34249959	34250655	34250757	ENSG00000165006:34241183-34242106:source	ENSG00000165006:34250656-34250757:target
UNC13B	ENSG00000198722	chr9	+	35396838	35396934	35397163	35397307	35397631	35397709	ENSG00000198722:35396838-35396934:source	ENSG00000198722:35397632-35397709:target
UNC13B	ENSG00000198722	chr9	+	35400293	35400440	35401947	35402004	35403163	35403256	ENSG00000198722:35400293-35400440:source	ENSG00000198722:35403164-35403256:target
TLN1	ENSG00000137076	chr9	-	35718808	35718907	35718352	35718403	35717616	35717783	ENSG00000137076:35717616-35717783:source	ENSG00000137076:35718809-35718907:target
ZCCHC7	ENSG00000147905	chr9	+	37302185	37302228	37304184	37304310	37305540	37305711	ENSG00000147905:37302185-37302228:source	ENSG00000147905:37305541-37305711:target
RP11-15J10.1	ENSG00000204778	chr9	-	70195030	70195082	70183432	70183501	70183264	70183329	ENSG00000204778:70183264-70183329:source	ENSG00000204778:70195031-70195082:target
FXN	ENSG00000165060	chr9	+	71661301	71661398	71668055	71668176	71679853	71679959	ENSG00000165060:71661301-71661398:source	ENSG00000165060:71679854-71679959:target
OSTF1	ENSG00000134996	chr9	+	77752454	77752532	77755749	77755848	77761598	77762181	ENSG00000134996:77752454-77752532:source	ENSG00000134996:77761599-77762181:target
RFK	ENSG00000135002	chr9	-	79009005	79009433	79007333	79007485	79003470	79003572	ENSG00000135002:79003470-79003572:source	ENSG00000135002:79009006-79009433:target
GCNT1	ENSG00000187210	chr9	+	79115832	79115977	79116668	79116847	79117154	79119154	ENSG00000187210:79115832-79115977:source	ENSG00000187210:79117155-79122332:target
VPS13A	ENSG00000197969	chr9	+	79917831	79917978	79920472	79920553	79922860	79923014	ENSG00000197969:79917831-79917978:source	ENSG00000197969:79922861-79923014:target
CEP78	ENSG00000148019	chr9	+	80854939	80855111	80855207	80855280	80856611	80856715	ENSG00000148019:80854939-80855111:source	ENSG00000148019:80856612-80856715:target
IDNK	ENSG00000148057	chr9	+	86243788	86243874	86256462	86256506	86258343	86259045	ENSG00000148057:86243788-86243874:source	ENSG00000148057:86258344-86259045:target
HNRNPK	ENSG00000165119	chr9	-	86595417	86595569	86593287	86593367	86593110	86593194	ENSG00000165119:86593110-86593194:source	ENSG00000165119:86595418-86595569:target
AGTPBP1	ENSG00000135049	chr9	-	88292350	88292497	88287464	88287596	88284400	88284493	ENSG00000135049:88284400-88284493:source	ENSG00000135049:88292351-88292497:target
NAA35	ENSG00000135040	chr9	+	88557070	88557198	88571274	88571308	88573386	88573501	ENSG00000135040:88557070-88557198:source	ENSG00000135040:88573387-88573501:target
NAA35	ENSG00000135040	chr9	+	88573387	88573501	88574707	88574782	88576927	88577095	ENSG00000135040:88573387-88573501:source	ENSG00000135040:88576928-88577095:target
SPTLC1	ENSG00000090054	chr9	-	94817686	94817776	94812577	94812773	94812242	94812349	ENSG00000090054:94812242-94812349:source	ENSG00000090054:94817687-94817776:target
FAM120A	ENSG00000048828	chr9	+	96324490	96324586	96324967	96325089	96326510	96328397	ENSG00000048828:96324490-96324586:source	ENSG00000048828:96326511-96328397:target
HIATL1	ENSG00000148110	chr9	+	97203267	97203381	97207245	97207464	97209104	97209218	ENSG00000148110:97203267-97203381:source	ENSG00000148110:97209105-97209218:target
HIATL2	ENSG00000196312	chr9	-	99735134	99735230	99725046	99725245	99721117	99721179	ENSG00000196312:99721117-99721179:source	ENSG00000196312:99735135-99735230:target
TDRD7	ENSG00000196116	chr9	+	100174232	100174520	100190741	100190954	100193214	100193356	ENSG00000196116:100174232-100174520:source	ENSG00000196116:100193215-100193356:target
TDRD7	ENSG00000196116	chr9	+	100235774	100235908	100237664	100237751	100240720	100240917	ENSG00000196116:100235774-100235908:source	ENSG00000196116:100240721-100240917:target
NCBP1	ENSG00000136937	chr9	+	100407399	100407506	100407892	100408014	100409773	100409843	ENSG00000136937:100407399-100407506:source	ENSG00000136937:100409774-100409843:target
TGFBR1	ENSG00000106799	chr9	+	101907014	101907170	101908766	101908891	101909935	101910066	ENSG00000106799:101907014-101907170:source	ENSG00000106799:101909936-101910066:target
ERP44	ENSG00000023318	chr9	-	102780537	102780595	102778603	102778720	102769860	102769971	ENSG00000023318:102769860-102769971:source	ENSG00000023318:102780538-102780595:target
RAD23B	ENSG00000119318	chr9	+	110062422	110062503	110064315	110064395	110068659	110068734	ENSG00000119318:110062422-110062503:source	ENSG00000119318:110068660-110068734:target
IKBKAP	ENSG00000070061	chr9	-	111640274	111640429	111637912	111638015	111637175	111637250	ENSG00000070061:111637175-111637250:source	ENSG00000070061:111640275-111640429:target
TMEM245	ENSG00000106771	chr9	-	111822633	111822732	111819470	111819602	111812850	111812972	ENSG00000106771:111812850-111812972:source	ENSG00000106771:111822634-111822732:target
TMEM245	ENSG00000106771	chr9	-	111849452	111849622	111848276	111848300	111843119	111843223	ENSG00000106771:111843119-111843223:source	ENSG00000106771:111849453-111849622:target
SLC31A2	ENSG00000136867	chr9	+	115920007	115920073	115920323	115920376	115923788	115923978	ENSG00000136867:115920007-115920073:source	ENSG00000136867:115923789-115923978:target
FKBP15	ENSG00000119321	chr9	-	115956306	115956449	115955771	115955829	115952751	115952858	ENSG00000119321:115952751-115952858:source	ENSG00000119321:115956307-115956449:target
CDK5RAP2	ENSG00000136861	chr9	-	123177317	123177437	123173635	123173752	123171405	123171594	ENSG00000136861:123171405-123171594:source	ENSG00000136861:123177318-123177437:target
PSMD5	ENSG00000095261	chr9	-	123605014	123605262	123595589	123595734	123593948	123594223	ENSG00000095261:123593948-123594223:source	ENSG00000095261:123605015-123605262:target
PHF19	ENSG00000119403	chr9	-	123636256	123636338	123634356	123634513	123632721	123632816	ENSG00000119403:123632721-123632816:source	ENSG00000119403:123636257-123636338:target
STOM	ENSG00000148175	chr9	-	124132404	124132531	124128393	124128523	124118331	124118434	ENSG00000148175:124118331-124118434:source	ENSG00000148175:124132405-124132531:target
RBM18	ENSG00000119446	chr9	-	125007534	125007620	125006022	125006147	125002322	125004322	ENSG00000119446:124999903-125004322:source	ENSG00000119446:125007535-125007620:target
RBM18	ENSG00000119446	chr9	-	125023658	125023787	125016552	125016646	125014126	125014252	ENSG00000119446:125014126-125014252:source	ENSG00000119446:125023659-125023787:target
STRBP	ENSG00000165209	chr9	-	125923255	125923347	125922645	125922741	125921375	125921486	ENSG00000165209:125921375-125921486:source	ENSG00000165209:125923256-125923347:target
STRBP	ENSG00000165209	chr9	-	125932180	125932325	125930467	125930537	125923256	125923347	ENSG00000165209:125923256-125923347:source	ENSG00000165209:125932181-125932325:target
STRBP	ENSG00000165209	chr9	-	125946410	125946577	125943146	125943254	125941286	125941506	ENSG00000165209:125941286-125941506:source	ENSG00000165209:125946411-125946577:target
DENND1A	ENSG00000119522	chr9	-	126219626	126219714	126219125	126219210	126217018	126217058	ENSG00000119522:126217018-126217058:source	ENSG00000119522:126219627-126219714:target
GOLGA1	ENSG00000136935	chr9	-	127674179	127674305	127670655	127670751	127662420	127662826	ENSG00000136935:127662420-127662826:source	ENSG00000136935:127674180-127674305:target
HSPA5	ENSG00000044574	chr9	-	128000868	128001106	128000419	128000587	127997433	127999433	ENSG00000044574:127997132-127999433:source	ENSG00000044574:128000869-128001106:target
HSPA5	ENSG00000044574	chr9	-	128002954	128003186	128002450	128002588	128001700	128001812	ENSG00000044574:128001700-128001812:source	ENSG00000044574:128002955-128003186:target
GAPVD1	ENSG00000165219	chr9	+	128086077	128086202	128088694	128088868	128092356	128092497	ENSG00000165219:128086077-128086202:source	ENSG00000165219:128092357-128092497:target
LRSAM1	ENSG00000148356	chr9	+	130217277	130217333	130217854	130217899	130219594	130219692	ENSG00000148356:130217277-130217333:source	ENSG00000148356:130219595-130219692:target
LRSAM1	ENSG00000148356	chr9	+	130251723	130251797	130253493	130253574	130255080	130255176	ENSG00000148356:130251723-130251797:source	ENSG00000148356:130255081-130255176:target
SLC25A25	ENSG00000148339	chr9	+	130863588	130863675	130864358	130864394	130864648	130864760	ENSG00000148339:130863588-130863675:source	ENSG00000148339:130864649-130864760:target
SWI5	ENSG00000175854	chr9	+	131038866	131039034	131040912	131040960	131046788	131046910	ENSG00000175854:131038866-131039034:source	ENSG00000175854:131046789-131046910:target
SLC27A4	ENSG00000167114	chr9	+	131114917	131115026	131115303	131115513	131115693	131115820	ENSG00000167114:131114917-131115026:source	ENSG00000167114:131115694-131115820:target
SPTAN1	ENSG00000197694	chr9	+	131339408	131339552	131339630	131339785	131340388	131340524	ENSG00000197694:131339408-131339552:source	ENSG00000197694:131340389-131340524:target
SPTAN1	ENSG00000197694	chr9	+	131383437	131383535	131383945	131384277	131386606	131387103	ENSG00000197694:131383437-131383535:source	ENSG00000197694:131386607-131387103:target
WDR34	ENSG00000119333	chr9	-	131418819	131419066	131417518	131417612	131402970	131403218	ENSG00000119333:131402970-131403218:source	ENSG00000119333:131418820-131419066:target
RP11-545E17.3	ENSG00000223478	chr9	+	131486724	131486914	131494673	131494791	131495120	131495473	ENSG00000223478:131486724-131486914:source	ENSG00000223478:131495121-131495473:target
PRRC2B	ENSG00000130723	chr9	+	134312007	134312109	134312232	134312282	134314375	134314448	ENSG00000130723:134312007-134312109:source	ENSG00000130723:134314376-134314448:target
C9orf9	ENSG00000165698	chr9	+	135759298	135759478	135762755	135762958	135763676	135763824	ENSG00000165698:135759298-135759478:source	ENSG00000165698:135763677-135763824:target
TSC1	ENSG00000165699	chr9	-	135804153	135804342	135802587	135802691	135800974	135801126	ENSG00000165699:135800974-135801126:source	ENSG00000165699:135804154-135804342:target
RALGDS	ENSG00000160271	chr9	-	135983374	135983793	135982471	135982687	135982032	135982135	ENSG00000160271:135982032-135982135:source	ENSG00000160271:135983375-135983793:target
SLC2A6	ENSG00000160326	chr9	-	136344089	136344259	136343375	136343538	136342157	136342363	ENSG00000160326:136342157-136342363:source	ENSG00000160326:136344090-136344259:target
VAV2	ENSG00000160293	chr9	-	136635499	136635623	136634538	136634625	136633564	136633718	ENSG00000160293:136633564-136633718:source	ENSG00000160293:136635500-136635623:target
VAV2	ENSG00000160293	chr9	-	136677235	136677338	136675312	136675327	136674162	136674260	ENSG00000160293:136674162-136674260:source	ENSG00000160293:136677236-136677338:target
WDR5	ENSG00000196363	chr9	+	137020462	137020495	137020814	137020889	137021627	137021775	ENSG00000196363:137020462-137020495:source	ENSG00000196363:137021628-137021775:target
DNLZ	ENSG00000213221	chr9	-	139257938	139258241	139257440	139257580	139254632	139256632	ENSG00000213221:139253932-139256632:source	ENSG00000213221:139257939-139258241:target
EHMT1	ENSG00000181090	chr9	+	140657127	140657272	140669560	140669704	140671069	140671296	ENSG00000181090:140657127-140657272:source	ENSG00000181090:140671070-140671296:target
EHMT1	ENSG00000181090	chr9	+	140674087	140674169	140676559	140676655	140676742	140676849	ENSG00000181090:140674087-140674169:source	ENSG00000181090:140676743-140676849:target
PSPC1	ENSG00000121390	chr13	-	20346381	20346683	20333668	20333833	20333463	20333558	ENSG00000121390:20333463-20333558:source	ENSG00000121390:20346382-20346683:target
ZMYM2	ENSG00000121741	chr13	+	20579214	20579379	20580513	20580726	20593686	20594103	ENSG00000121741:20579214-20579379:source	ENSG00000121741:20593687-20594103:target
CRYL1	ENSG00000165475	chr13	-	21013731	21013893	21006240	21006435	20987421	20987526	ENSG00000165475:20987421-20987526:source	ENSG00000165475:21013732-21013893:target
PARP4	ENSG00000102699	chr13	-	25073438	25073514	25072253	25072367	25068711	25068860	ENSG00000102699:25068711-25068860:source	ENSG00000102699:25073439-25073514:target
USPL1	ENSG00000132952	chr13	+	31221069	31221194	31227284	31227442	31231610	31233610	ENSG00000132952:31221069-31221194:source	ENSG00000132952:31231611-31233686:target
HSPH1	ENSG00000120694	chr13	-	31719699	31719905	31717928	31718060	31715259	31715396	ENSG00000120694:31715259-31715396:source	ENSG00000120694:31719700-31719905:target
B3GALTL	ENSG00000187676	chr13	+	31835083	31835219	31843350	31843414	31848645	31848765	ENSG00000187676:31835083-31835219:source	ENSG00000187676:31848646-31848765:target
B3GALTL	ENSG00000187676	chr13	+	31843351	31843414	31848645	31848765	31850838	31850908	ENSG00000187676:31843351-31843414:source	ENSG00000187676:31850839-31850908:target
B3GALTL	ENSG00000187676	chr13	+	31850839	31850908	31857205	31857443	31858784	31858898	ENSG00000187676:31850839-31850908:source	ENSG00000187676:31858785-31858898:target
SUPT20H	ENSG00000102710	chr13	-	37596147	37596217	37595584	37595739	37593479	37593534	ENSG00000102710:37593479-37593534:source	ENSG00000102710:37596148-37596217:target
MRPS31	ENSG00000102738	chr13	-	41323273	41323749	41318447	41318480	41303432	41303737	ENSG00000102738:41303432-41303737:source	ENSG00000102738:41323274-41323749:target
WBP4	ENSG00000120688	chr13	+	41636780	41636852	41639151	41639214	41639299	41639423	ENSG00000120688:41636780-41636852:source	ENSG00000120688:41639300-41639423:target
WBP4	ENSG00000120688	chr13	+	41646918	41646993	41650179	41650373	41654781	41654945	ENSG00000120688:41646918-41646993:source	ENSG00000120688:41654782-41654945:target
LCP1	ENSG00000136167	chr13	-	46725070	46725213	46722916	46722943	46722487	46722582	ENSG00000136167:46722487-46722582:source	ENSG00000136167:46725071-46725213:target
KIAA0226L	ENSG00000102445	chr13	-	46923420	46923482	46919581	46919735	46918876	46918966	ENSG00000102445:46918876-46918966:source	ENSG00000102445:46923421-46923482:target
LRCH1	ENSG00000136141	chr13	+	47286660	47286732	47289694	47289799	47297355	47297465	ENSG00000136141:47286660-47286732:source	ENSG00000136141:47297356-47297465:target
LRCH1	ENSG00000136141	chr13	+	47297356	47297465	47302072	47302194	47302981	47303119	ENSG00000136141:47297356-47297465:source	ENSG00000136141:47302982-47303119:target
ESD	ENSG00000139684	chr13	-	47365480	47365555	47364731	47364796	47361156	47361244	ENSG00000139684:47361156-47361244:source	ENSG00000139684:47365481-47365555:target
MED4	ENSG00000136146	chr13	-	48660417	48660588	48657506	48657564	48655781	48655867	ENSG00000136146:48655781-48655867:source	ENSG00000136146:48660418-48660588:target
RB1	ENSG00000139687	chr13	+	49033822	49033969	49037866	49037971	49039133	49039247	ENSG00000139687:49033822-49033969:source	ENSG00000139687:49039134-49039247:target
FNDC3A	ENSG00000102531	chr13	+	49742749	49742887	49746178	49746232	49748570	49748695	ENSG00000102531:49742749-49742887:source	ENSG00000102531:49748571-49748695:target
PHF11	ENSG00000136147	chr13	+	50100325	50100594	50101341	50101490	50102646	50103123	ENSG00000136147:50100325-50100594:source	ENSG00000136147:50102647-50103123:target
RCBTB1	ENSG00000136144	chr13	-	50115011	50115142	50112005	50112219	50106398	50108398	ENSG00000136144:50106082-50108398:source	ENSG00000136144:50115012-50115142:target
RCBTB1	ENSG00000136144	chr13	-	50134053	50134220	50132421	50132470	50129651	50129809	ENSG00000136144:50129651-50129809:source	ENSG00000136144:50134054-50134220:target
INTS6	ENSG00000102786	chr13	-	51957464	51957597	51956164	51956259	51953598	51953708	ENSG00000102786:51953598-51953708:source	ENSG00000102786:51957465-51957597:target
ATP7B	ENSG00000123191	chr13	-	52520419	52520699	52518244	52518427	52516522	52516690	ENSG00000123191:52516522-52516690:source	ENSG00000123191:52520420-52520699:target
TDRD3	ENSG00000083544	chr13	+	61057909	61057980	61058826	61058891	61059932	61060082	ENSG00000083544:61057909-61057980:source	ENSG00000083544:61059933-61060082:target
MZT1	ENSG00000204899	chr13	-	73293089	73293235	73285163	73285219	73282495	73284483	ENSG00000204899:73282495-73284483:source	ENSG00000204899:73293090-73293235:target
BORA	ENSG00000136122	chr13	+	73312100	73312181	73312575	73312668	73317674	73317740	ENSG00000136122:73312100-73312181:source	ENSG00000136122:73317675-73317740:target
DIS3	ENSG00000083520	chr13	-	73345218	73345283	73345041	73345126	73342923	73343050	ENSG00000083520:73342923-73343050:source	ENSG00000083520:73345219-73345283:target
DIS3	ENSG00000083520	chr13	-	73352324	73352518	73351557	73351631	73350063	73350230	ENSG00000083520:73350063-73350230:source	ENSG00000083520:73352325-73352518:target
KLF12	ENSG00000118922	chr13	-	74289504	74289662	74278254	74278339	74267808	74269808	ENSG00000118922:74260226-74269808:source	ENSG00000118922:74289505-74289662:target
UCHL3	ENSG00000118939	chr13	+	76143259	76143643	76164073	76164265	76169050	76169126	ENSG00000118939:76143259-76143643:source	ENSG00000118939:76169051-76169126:target
MYCBP2	ENSG00000005810	chr13	-	77847606	77847803	77846457	77846534	77844431	77844673	ENSG00000005810:77844431-77844673:source	ENSG00000005810:77847607-77847803:target
ABCC4	ENSG00000125257	chr13	-	95899228	95899349	95886863	95887088	95862946	95863035	ENSG00000125257:95862946-95863035:source	ENSG00000125257:95899229-95899349:target
DNAJC3	ENSG00000102580	chr13	+	96377432	96377506	96409897	96410050	96412293	96412475	ENSG00000102580:96377432-96377506:source	ENSG00000102580:96412294-96412475:target
MBNL2	ENSG00000139793	chr13	+	97927886	97928663	97969482	97969540	97986529	97986694	ENSG00000139793:97927886-97928663:source	ENSG00000139793:97986530-97986694:target
TM9SF2	ENSG00000125304	chr13	+	100207790	100207901	100211616	100211788	100214944	100216260	ENSG00000125304:100207790-100207901:source	ENSG00000125304:100214945-100216260:target
KDELC1	ENSG00000134901	chr13	-	103443250	103443488	103441361	103441571	103440184	103440273	ENSG00000134901:103440184-103440273:source	ENSG00000134901:103443251-103443488:target
ARHGEF7	ENSG00000102606	chr13	+	111919895	111920017	111926160	111926299	111927077	111927137	ENSG00000102606:111919895-111920017:source	ENSG00000102606:111927078-111927137:target
TUBGCP3	ENSG00000126216	chr13	-	113158939	113159028	113158345	113158477	113153359	113153499	ENSG00000126216:113153359-113153499:source	ENSG00000126216:113158940-113159028:target
CUL4A	ENSG00000139842	chr13	+	113909267	113909439	113914920	113915073	113917800	113919399	ENSG00000139842:113909267-113909439:source	ENSG00000139842:113917801-113919399:target
ZMYND11	ENSG00000015171	chr10	+	285902	286051	286832	286910	287960	288079	ENSG00000015171:285902-286051:source	ENSG00000015171:287961-288079:target
GTPBP4	ENSG00000107937	chr10	+	1034338	1034467	1038428	1038599	1041868	1041972	ENSG00000107937:1034338-1034467:source	ENSG00000107937:1041869-1041972:target
PRKCQ	ENSG00000065675	chr10	-	6498635	6498774	6483854	6484043	6472772	6472900	ENSG00000065675:6472772-6472900:source	ENSG00000065675:6498636-6498774:target
UPF2	ENSG00000151461	chr10	-	12046528	12046726	12043674	12043824	12041905	12042008	ENSG00000151461:12041905-12042008:source	ENSG00000151461:12046529-12046726:target
DHTKD1	ENSG00000181192	chr10	+	12123471	12123626	12126538	12126750	12129533	12129728	ENSG00000181192:12123471-12123626:source	ENSG00000181192:12129534-12129728:target
OPTN	ENSG00000123240	chr10	+	13174067	13174197	13175501	13175581	13178744	13180291	ENSG00000123240:13174067-13174197:source	ENSG00000123240:13178745-13180291:target
MCM10	ENSG00000065328	chr10	+	13224933	13225100	13228163	13228280	13230880	13231080	ENSG00000065328:13224933-13225100:source	ENSG00000065328:13230881-13231080:target
PRPF18	ENSG00000165630	chr10	+	13639458	13639535	13639644	13639671	13642243	13642348	ENSG00000165630:13639458-13639535:source	ENSG00000165630:13642244-13642348:target
NSUN6	ENSG00000241058	chr10	-	18874877	18875022	18870609	18870727	18840752	18840900	ENSG00000241058:18840752-18840900:source	ENSG00000241058:18874878-18875022:target
DNAJC1	ENSG00000136770	chr10	-	22217968	22218070	22217434	22217481	22209539	22209892	ENSG00000136770:22209539-22209892:source	ENSG00000136770:22217969-22218070:target
PIP4K2A	ENSG00000150867	chr10	-	22862239	22862386	22857941	22857983	22856780	22856818	ENSG00000150867:22856780-22856818:source	ENSG00000150867:22862240-22862386:target
ARHGAP21	ENSG00000107863	chr10	-	25010765	25010856	25003225	25003307	24959147	24959326	ENSG00000107863:24959147-24959326:source	ENSG00000107863:25010766-25010856:target
APBB1IP	ENSG00000077420	chr10	+	26800676	26800835	26802467	26802589	26822367	26822454	ENSG00000077420:26800676-26800835:source	ENSG00000077420:26822368-26822454:target
ABI1	ENSG00000136754	chr10	-	27059173	27059274	27057780	27057921	27054147	27054247	ENSG00000136754:27054147-27054247:source	ENSG00000136754:27059174-27059274:target
YME1L1	ENSG00000136758	chr10	-	27411769	27411902	27410314	27410377	27409364	27409476	ENSG00000136758:27409364-27409476:source	ENSG00000136758:27411770-27411902:target
YME1L1	ENSG00000136758	chr10	-	27443106	27444195	27442155	27442210	27437835	27437969	ENSG00000136758:27437835-27437969:source	ENSG00000136758:27443107-27444195:target
ACBD5	ENSG00000107897	chr10	-	27504463	27504570	27499742	27500010	27497175	27497374	ENSG00000107897:27497175-27497374:source	ENSG00000107897:27504464-27504570:target
ACBD5	ENSG00000107897	chr10	-	27529247	27529511	27524020	27524141	27520677	27520749	ENSG00000107897:27520677-27520749:source	ENSG00000107897:27529248-27529511:target
CUL2	ENSG00000108094	chr10	-	35302626	35302728	35300775	35300892	35297479	35299370	ENSG00000108094:35297479-35299370:source	ENSG00000108094:35302627-35302728:target
CUL2	ENSG00000108094	chr10	-	35320227	35320314	35318415	35318568	35317738	35317815	ENSG00000108094:35317738-35317815:source	ENSG00000108094:35320228-35320314:target
ZNF25	ENSG00000175395	chr10	-	38242622	38242686	38242210	38242292	38240123	38242123	ENSG00000175395:38238500-38242123:source	ENSG00000175395:38242623-38242686:target
ZNF25	ENSG00000175395	chr10	-	38245947	38246043	38245717	38245836	38242623	38242686	ENSG00000175395:38242623-38242686:source	ENSG00000175395:38245948-38246043:target
CSGALNACT2	ENSG00000169826	chr10	+	43662452	43662546	43667431	43667611	43671398	43671480	ENSG00000169826:43662452-43662546:source	ENSG00000169826:43671399-43671480:target
MAPK8	ENSG00000107643	chr10	+	49609655	49609825	49612894	49613024	49617921	49617980	ENSG00000107643:49609655-49609825:source	ENSG00000107643:49617922-49617980:target
ENSG00000138293	ENSG00000138293	chr10	+	51586271	51586411	51586609	51586698	51589224	51590734	ENSG00000138293:51586271-51586411:source	ENSG00000138293:51589225-51590734:target
AGAP6	ENSG00000204149	chr10	+	51748078	51748698	51749067	51749136	51751435	51751504	ENSG00000204149:51748078-51748698:source	ENSG00000204149:51751436-51751504:target
ZWINT	ENSG00000122952	chr10	-	58119447	58119614	58119236	58119293	58118566	58118708	ENSG00000122952:58118566-58118708:source	ENSG00000122952:58119448-58119614:target
CISD1	ENSG00000122873	chr10	+	60036877	60037082	60042658	60042842	60047320	60047759	ENSG00000122873:60036877-60037082:source	ENSG00000122873:60047321-60047759:target
TFAM	ENSG00000108064	chr10	+	60145980	60146098	60146409	60146476	60147949	60148020	ENSG00000108064:60145980-60146098:source	ENSG00000108064:60147950-60148020:target
RHOBTB1	ENSG00000072422	chr10	-	62647969	62648943	62645869	62645988	62637666	62637816	ENSG00000072422:62637666-62637816:source	ENSG00000072422:62647970-62648943:target
REEP3	ENSG00000165476	chr10	+	65354538	65354614	65357783	65357904	65358929	65359043	ENSG00000165476:65354538-65354614:source	ENSG00000165476:65358930-65359043:target
HERC4	ENSG00000148634	chr10	-	69699344	69699411	69695909	69695992	69692354	69692537	ENSG00000148634:69692354-69692537:source	ENSG00000148634:69699345-69699411:target
CCAR1	ENSG00000060339	chr10	+	70532745	70532856	70545022	70545120	70545892	70545975	ENSG00000060339:70532745-70532856:source	ENSG00000060339:70545893-70545975:target
KIAA1279	ENSG00000198954	chr10	+	70748487	70749014	70754959	70755034	70760179	70760278	ENSG00000198954:70748487-70749014:source	ENSG00000198954:70760180-70760278:target
SRGN	ENSG00000122862	chr10	+	70847862	70847992	70856839	70856987	70863626	70864567	ENSG00000122862:70847862-70847992:source	ENSG00000122862:70863627-70864567:target
HK1	ENSG00000156515	chr10	+	71154706	71154861	71158350	71158584	71160746	71161638	ENSG00000156515:71154706-71154861:source	ENSG00000156515:71160747-71161638:target
PPA1	ENSG00000180817	chr10	-	71968960	71969046	71966019	71966089	71963345	71964671	ENSG00000180817:71963345-71964671:source	ENSG00000180817:71968961-71969046:target
EIF4EBP2	ENSG00000148730	chr10	+	72164135	72164302	72170676	72170734	72179669	72179855	ENSG00000148730:72164135-72164302:source	ENSG00000148730:72179670-72179855:target
PSAP	ENSG00000197746	chr10	-	73610938	73611126	73594128	73594262	73591593	73591677	ENSG00000197746:73591593-73591677:source	ENSG00000197746:73610939-73611126:target
ANAPC16	ENSG00000166295	chr10	+	73982891	73983814	73990123	73990198	73992758	73994758	ENSG00000166295:73982891-73983814:source	ENSG00000166295:73992759-73995618:target
P4HA1	ENSG00000122884	chr10	-	74834565	74834673	74833488	74833585	74831787	74831938	ENSG00000122884:74831787-74831938:source	ENSG00000122884:74834566-74834673:target
ANXA7	ENSG00000138279	chr10	-	75138668	75138781	75137202	75137324	75134859	75135975	ENSG00000138279:75134859-75135975:source	ENSG00000138279:75138669-75138781:target
PPP3CB	ENSG00000107758	chr10	-	75238256	75238381	75236915	75236969	75234677	75234788	ENSG00000107758:75234677-75234788:source	ENSG00000107758:75238257-75238381:target
AGAP5	ENSG00000172650	chr10	-	75457290	75457639	75456852	75456921	75454494	75454562	ENSG00000172650:75454494-75454562:source	ENSG00000172650:75457291-75457639:target
BMS1P4	ENSG00000242338	chr10	-	75480295	75480417	75479764	75479952	75478918	75479057	ENSG00000242338:75478918-75479057:source	ENSG00000242338:75480296-75480417:target
VCL	ENSG00000035403	chr10	+	75868777	75868914	75871666	75871870	75873941	75874145	ENSG00000035403:75868777-75868914:source	ENSG00000035403:75873942-75874145:target
POLR3A	ENSG00000148606	chr10	-	79743962	79744056	79743677	79743770	79742411	79742575	ENSG00000148606:79742411-79742575:source	ENSG00000148606:79743963-79744056:target
TSPAN14	ENSG00000108219	chr10	+	82271900	82272025	82272474	82272592	82273774	82273819	ENSG00000108219:82271900-82272025:source	ENSG00000108219:82273775-82273819:target
CCSER2	ENSG00000107771	chr10	+	86230128	86230214	86232787	86232902	86237330	86237420	ENSG00000107771:86230128-86230214:source	ENSG00000107771:86237331-86237420:target
TNKS2	ENSG00000107854	chr10	+	93582053	93582119	93586773	93586960	93588041	93588163	ENSG00000107854:93582053-93582119:source	ENSG00000107854:93588042-93588163:target
TNKS2	ENSG00000107854	chr10	+	93608140	93608392	93609268	93609351	93610972	93611093	ENSG00000107854:93608140-93608392:source	ENSG00000107854:93610973-93611093:target
TNKS2	ENSG00000107854	chr10	+	93610973	93611093	93614785	93614883	93615370	93615445	ENSG00000107854:93610973-93611093:source	ENSG00000107854:93615371-93615445:target
TNKS2	ENSG00000107854	chr10	+	93619219	93619405	93621215	93621293	93621755	93621912	ENSG00000107854:93619219-93619405:source	ENSG00000107854:93621756-93621912:target
BTAF1	ENSG00000095564	chr10	+	93778540	93778692	93784512	93784724	93786348	93786508	ENSG00000095564:93778540-93778692:source	ENSG00000095564:93786349-93786508:target
BTAF1	ENSG00000095564	chr10	+	93786349	93786508	93786886	93787057	93788546	93790082	ENSG00000095564:93786349-93786508:source	ENSG00000095564:93788547-93790082:target
IDE	ENSG00000119912	chr10	-	94225432	94225600	94223487	94223760	94220948	94221009	ENSG00000119912:94220948-94221009:source	ENSG00000119912:94225433-94225600:target
ALDH18A1	ENSG00000059573	chr10	-	97397043	97397193	97396849	97396954	97393248	97393406	ENSG00000059573:97393248-97393406:source	ENSG00000059573:97397044-97397193:target
ALDH18A1	ENSG00000059573	chr10	-	97413046	97413162	97402748	97402963	97397044	97397193	ENSG00000059573:97397044-97397193:source	ENSG00000059573:97413047-97413162:target
TCTN3	ENSG00000119977	chr10	-	97442407	97442596	97440228	97440366	97423158	97424057	ENSG00000119977:97423158-97424057:source	ENSG00000119977:97442408-97442596:target
RRP12	ENSG00000052749	chr10	-	99140555	99140670	99139384	99139527	99139050	99139171	ENSG00000052749:99139050-99139171:source	ENSG00000052749:99140556-99140670:target
RRP12	ENSG00000052749	chr10	-	99160061	99160291	99155974	99156058	99153441	99153517	ENSG00000052749:99153441-99153517:source	ENSG00000052749:99160062-99160291:target
MORN4	ENSG00000171160	chr10	-	99376964	99377079	99376434	99376544	99374310	99376168	ENSG00000171160:99374310-99376168:source	ENSG00000171160:99376965-99377079:target
R3HCC1L	ENSG00000166024	chr10	+	99995781	99995921	100000254	100000316	100003847	100004654	ENSG00000166024:99995781-99995921:source	ENSG00000166024:100003848-100004654:target
HPS1	ENSG00000107521	chr10	-	100205056	100205170	100202880	100202997	100195392	100195529	ENSG00000107521:100195392-100195529:source	ENSG00000107521:100205057-100205170:target
ERLIN1	ENSG00000107566	chr10	-	101933964	101934038	101927104	101927163	101923761	101923852	ENSG00000107566:101923761-101923852:source	ENSG00000107566:101933965-101934038:target
CHUK	ENSG00000213341	chr10	-	101964262	101964414	101961844	101961906	101960428	101960537	ENSG00000213341:101960428-101960537:source	ENSG00000213341:101964263-101964414:target
FAM178A	ENSG00000119906	chr10	+	102707517	102707604	102709832	102709964	102710432	102710510	ENSG00000119906:102707517-102707604:source	ENSG00000119906:102710433-102710510:target
FAM178A	ENSG00000119906	chr10	+	102709833	102709964	102710432	102710510	102716207	102716294	ENSG00000119906:102709833-102709964:source	ENSG00000119906:102716208-102716294:target
GBF1	ENSG00000107862	chr10	+	104118856	104119192	104119940	104120152	104120778	104120944	ENSG00000107862:104118856-104119192:source	ENSG00000107862:104120779-104120944:target
GBF1	ENSG00000107862	chr10	+	104127975	104128211	104128495	104128589	104128967	104129144	ENSG00000107862:104127975-104128211:source	ENSG00000107862:104128968-104129144:target
GBF1	ENSG00000107862	chr10	+	104140263	104140443	104140883	104141012	104141812	104142656	ENSG00000107862:104140263-104140443:source	ENSG00000107862:104141813-104142656:target
NT5C2	ENSG00000076685	chr10	-	104850692	104850753	104850367	104850544	104847665	104849665	ENSG00000076685:104845940-104849665:source	ENSG00000076685:104850693-104850753:target
TAF5	ENSG00000148835	chr10	+	105142995	105143124	105145082	105145247	105146931	105147109	ENSG00000148835:105142995-105143124:source	ENSG00000148835:105146932-105147109:target
PDCD11	ENSG00000148843	chr10	+	105166366	105166547	105169455	105169563	105172872	105173079	ENSG00000148843:105166366-105166547:source	ENSG00000148843:105172873-105173079:target
PDCD11	ENSG00000148843	chr10	+	105197772	105197828	105198442	105198565	105199502	105199625	ENSG00000148843:105197772-105197828:source	ENSG00000148843:105199503-105199625:target
SH3PXD2A	ENSG00000107957	chr10	-	105386845	105386959	105382226	105382310	105376954	105377071	ENSG00000107957:105376954-105377071:source	ENSG00000107957:105386846-105386959:target
OBFC1	ENSG00000107960	chr10	-	105677219	105677427	105670284	105670380	105664849	105664914	ENSG00000107960:105664849-105664914:source	ENSG00000107960:105677220-105677427:target
SLK	ENSG00000065613	chr10	+	105767935	105768114	105770573	105770666	105777917	105778047	ENSG00000065613:105767935-105768114:source	ENSG00000065613:105777918-105778047:target
GSTO1	ENSG00000148834	chr10	+	106014744	106015029	106017123	106017241	106019333	106019556	ENSG00000148834:106014744-106015029:source	ENSG00000148834:106019334-106019556:target
SMC3	ENSG00000108055	chr10	+	112328696	112328771	112333464	112333503	112335093	112335161	ENSG00000108055:112328696-112328771:source	ENSG00000108055:112335094-112335161:target
CCDC186	ENSG00000165813	chr10	-	115887219	115887430	115885644	115885864	115882985	115884985	ENSG00000165813:115880621-115884985:source	ENSG00000165813:115887220-115887430:target
FAM160B1	ENSG00000151553	chr10	+	116606849	116606992	116608405	116608496	116614955	116615099	ENSG00000151553:116606849-116606992:source	ENSG00000151553:116614956-116615099:target
ATRNL1	ENSG00000107518	chr10	+	116887357	116887485	116888170	116888272	116889088	116889297	ENSG00000107518:116887357-116887485:source	ENSG00000107518:116889089-116889297:target
EIF3A	ENSG00000107581	chr10	-	120828957	120829166	120824910	120825082	120820736	120820840	ENSG00000107581:120820736-120820840:source	ENSG00000107581:120828958-120829166:target
C10orf88	ENSG00000119965	chr10	-	124708164	124708371	124701223	124701311	124697221	124697675	ENSG00000119965:124697221-124697675:source	ENSG00000119965:124708165-124708371:target
FAM175B	ENSG00000165660	chr10	+	126495400	126495490	126505144	126505181	126507952	126508019	ENSG00000165660:126495400-126495490:source	ENSG00000165660:126507953-126508019:target
ZRANB1	ENSG00000019995	chr10	+	126655163	126655350	126658347	126658440	126660533	126660687	ENSG00000019995:126655163-126655350:source	ENSG00000019995:126660534-126660687:target
EDRF1	ENSG00000107938	chr10	+	127442263	127442414	127449796	127449883	127451869	127452275	ENSG00000107938:127442263-127442414:source	ENSG00000107938:127451870-127452275:target
BCCIP	ENSG00000107949	chr10	+	127516127	127516207	127519130	127519220	127519988	127520219	ENSG00000107949:127516127-127516207:source	ENSG00000107949:127519989-127520219:target
PTPRE	ENSG00000132334	chr10	+	129875881	129876047	129877823	129877959	129881095	129881204	ENSG00000132334:129875881-129876047:source	ENSG00000132334:129881096-129881204:target
SDHA	ENSG00000073578	chr5	+	218356	218533	220354	220452	223596	223683	ENSG00000073578:218356-218533:source	ENSG00000073578:223597-223683:target
CEP72	ENSG00000112877	chr5	+	633884	634062	635486	635699	637631	637933	ENSG00000112877:633884-634062:source	ENSG00000112877:637632-637933:target
ANKH	ENSG00000154122	chr5	-	14749280	14749415	14747409	14747521	14745979	14746071	ENSG00000154122:14745979-14746071:source	ENSG00000154122:14749281-14749415:target
ZFR	ENSG00000056097	chr5	-	32400111	32400308	32397324	32397444	32395265	32395410	ENSG00000056097:32395265-32395410:source	ENSG00000056097:32400112-32400308:target
ZFR	ENSG00000056097	chr5	-	32444334	32444602	32421735	32421759	32419925	32420208	ENSG00000056097:32419925-32420208:source	ENSG00000056097:32444335-32444602:target
NIPBL	ENSG00000164190	chr5	+	37010189	37010327	37012277	37012394	37014784	37014867	ENSG00000164190:37010189-37010327:source	ENSG00000164190:37014785-37014867:target
NIPBL	ENSG00000164190	chr5	+	37058993	37059267	37060945	37061120	37063891	37064292	ENSG00000164190:37058993-37059267:source	ENSG00000164190:37063892-37064292:target
NUP155	ENSG00000113569	chr5	-	37326002	37326069	37324093	37324209	37318090	37318187	ENSG00000113569:37318090-37318187:source	ENSG00000113569:37326003-37326069:target
WDR70	ENSG00000082068	chr5	+	37379314	37379494	37379590	37379656	37381703	37381911	ENSG00000082068:37379314-37379494:source	ENSG00000082068:37381704-37381911:target
WDR70	ENSG00000082068	chr5	+	37605166	37605340	37688011	37688109	37697756	37698009	ENSG00000082068:37605166-37605340:source	ENSG00000082068:37697757-37698009:target
RICTOR	ENSG00000164327	chr5	-	38971978	38972063	38968044	38968132	38967439	38967529	ENSG00000164327:38967439-38967529:source	ENSG00000164327:38971979-38972063:target
FYB	ENSG00000082074	chr5	-	39141196	39141243	39139334	39139354	39138759	39138793	ENSG00000082074:39138759-39138793:source	ENSG00000082074:39141197-39141243:target
OXCT1	ENSG00000083720	chr5	-	41853520	41853656	41853040	41853165	41850132	41850281	ENSG00000083720:41850132-41850281:source	ENSG00000083720:41853521-41853656:target
PAIP1	ENSG00000172239	chr5	-	43555931	43556101	43547829	43548015	43543106	43543218	ENSG00000172239:43543106-43543218:source	ENSG00000172239:43555932-43556101:target
NNT	ENSG00000112992	chr5	+	43677827	43677908	43700220	43700339	43702722	43702838	ENSG00000112992:43677827-43677908:source	ENSG00000112992:43702723-43702838:target
EMB	ENSG00000170571	chr5	-	49698119	49698153	49695692	49695747	49693124	49695124	ENSG00000170571:49692026-49695124:source	ENSG00000170571:49698120-49698153:target
EMB	ENSG00000170571	chr5	-	49707030	49707832	49706710	49706799	49701559	49701686	ENSG00000170571:49701559-49701686:source	ENSG00000170571:49707031-49707832:target
PARP8	ENSG00000151883	chr5	+	50074394	50074484	50084356	50084423	50090040	50090166	ENSG00000151883:50074394-50074484:source	ENSG00000151883:50090041-50090166:target
PARP8	ENSG00000151883	chr5	+	50111266	50111358	50117046	50117172	50118168	50118234	ENSG00000151883:50111266-50111358:source	ENSG00000151883:50118169-50118234:target
DHX29	ENSG00000067248	chr5	-	54603214	54603550	54594418	54594492	54593113	54593226	ENSG00000067248:54593113-54593226:source	ENSG00000067248:54603215-54603550:target
MIER3	ENSG00000155545	chr5	-	56233404	56233525	56232720	56232763	56231493	56231578	ENSG00000155545:56231493-56231578:source	ENSG00000155545:56233405-56233525:target
CWC27	ENSG00000153015	chr5	+	64079663	64079806	64081307	64081406	64082350	64082454	ENSG00000153015:64079663-64079806:source	ENSG00000153015:64082351-64082454:target
SGTB	ENSG00000197860	chr5	-	64976320	64976383	64968070	64968108	64967742	64967825	ENSG00000197860:64967742-64967825:source	ENSG00000197860:64976321-64976383:target
SGTB	ENSG00000197860	chr5	-	65000105	65000205	64981194	64981299	64976483	64976621	ENSG00000197860:64976483-64976621:source	ENSG00000197860:65000106-65000205:target
ERBB2IP	ENSG00000112851	chr5	+	65371938	65372236	65372702	65372777	65374250	65376250	ENSG00000112851:65371938-65372236:source	ENSG00000112851:65374251-65378377:target
RAD17	ENSG00000152942	chr5	+	68682223	68682292	68684860	68684972	68687657	68687746	ENSG00000152942:68682223-68682292:source	ENSG00000152942:68687658-68687746:target
RAD17	ENSG00000152942	chr5	+	68687795	68687840	68688597	68688719	68688981	68689067	ENSG00000152942:68687795-68687840:source	ENSG00000152942:68688982-68689067:target
HEXB	ENSG00000049860	chr5	+	73992821	73992931	73996577	73996675	74001043	74001993	ENSG00000049860:73992821-73992931:source	ENSG00000049860:74001044-74001993:target
COL4A3BP	ENSG00000113163	chr5	-	74801806	74801941	74754889	74755006	74722196	74722303	ENSG00000113163:74722196-74722303:source	ENSG00000113163:74801807-74801941:target
SCAMP1	ENSG00000085365	chr5	+	77714599	77714727	77717624	77717784	77745756	77745857	ENSG00000085365:77714599-77714727:source	ENSG00000085365:77745757-77745857:target
ZFYVE16	ENSG00000039319	chr5	+	79729928	79730036	79731580	79731673	79732574	79734574	ENSG00000039319:79729928-79730036:source	ENSG00000039319:79732575-79734826:target
ZFYVE16	ENSG00000039319	chr5	+	79755233	79755313	79768579	79768742	79769572	79769678	ENSG00000039319:79755233-79755313:source	ENSG00000039319:79769573-79769678:target
RASA1	ENSG00000145715	chr5	+	86659165	86659321	86662167	86662312	86665629	86665718	ENSG00000145715:86659165-86659321:source	ENSG00000145715:86665630-86665718:target
TTC37	ENSG00000198677	chr5	-	94830385	94830497	94829546	94829653	94826612	94826740	ENSG00000198677:94826612-94826740:source	ENSG00000198677:94830386-94830497:target
ARSK	ENSG00000164291	chr5	+	94927105	94927329	94936328	94936387	94936550	94936775	ENSG00000164291:94927105-94927329:source	ENSG00000164291:94936551-94936775:target
CAST	ENSG00000153113	chr5	+	96078359	96078460	96082045	96082129	96083048	96083103	ENSG00000153113:96078359-96078460:source	ENSG00000153113:96083049-96083103:target
PAM	ENSG00000145730	chr5	+	102345455	102345570	102353037	102353137	102355493	102355547	ENSG00000145730:102345455-102345570:source	ENSG00000145730:102355494-102355547:target
PJA2	ENSG00000198961	chr5	-	108679890	108680012	108674039	108674171	108671057	108673057	ENSG00000198961:108670410-108673057:source	ENSG00000198961:108679891-108680012:target
PJA2	ENSG00000198961	chr5	-	108691615	108691727	108680753	108680876	108680406	108680520	ENSG00000198961:108680406-108680520:source	ENSG00000198961:108691616-108691727:target
MAN2A1	ENSG00000112893	chr5	+	109159424	109159538	109166534	109166681	109178028	109178162	ENSG00000112893:109159424-109159538:source	ENSG00000112893:109178029-109178162:target
WDR36	ENSG00000134987	chr5	+	110459503	110459622	110459805	110459887	110461305	110461493	ENSG00000134987:110459503-110459622:source	ENSG00000134987:110461306-110461493:target
APC	ENSG00000134982	chr5	+	112116487	112116600	112128142	112128226	112136975	112137080	ENSG00000134982:112116487-112116600:source	ENSG00000134982:112136976-112137080:target
APC	ENSG00000134982	chr5	+	112136976	112137080	112145822	112146008	112151191	112151290	ENSG00000134982:112136976-112137080:source	ENSG00000134982:112151192-112151290:target
HSD17B4	ENSG00000133835	chr5	+	118844836	118844939	118845124	118845189	118850675	118850741	ENSG00000133835:118844836-118844939:source	ENSG00000133835:118850676-118850741:target
CEP120	ENSG00000168944	chr5	-	122700189	122700288	122693945	122694139	122685638	122685783	ENSG00000168944:122685638-122685783:source	ENSG00000168944:122700190-122700288:target
CSNK1G3	ENSG00000151292	chr5	+	122927013	122927108	122930732	122930828	122940417	122940524	ENSG00000151292:122927013-122927108:source	ENSG00000151292:122940418-122940524:target
RAPGEF6	ENSG00000158987	chr5	-	130766551	130767042	130764594	130764909	130760984	130762984	ENSG00000158987:130759614-130762984:source	ENSG00000158987:130766552-130767042:target
RAPGEF6	ENSG00000158987	chr5	-	130857082	130857214	130846985	130846994	130846007	130846184	ENSG00000158987:130846007-130846184:source	ENSG00000158987:130857083-130857214:target
FNIP1	ENSG00000217128	chr5	-	131006155	131006324	130987494	130987692	130982783	130982898	ENSG00000217128:130982783-130982898:source	ENSG00000217128:131006156-131006324:target
FNIP1	ENSG00000217128	chr5	-	131034609	131034695	131014721	131014868	131013290	131013565	ENSG00000217128:131013290-131013565:source	ENSG00000217128:131034610-131034695:target
RAD50	ENSG00000113522	chr5	+	131926916	131927098	131927568	131927726	131930560	131930736	ENSG00000113522:131926916-131927098:source	ENSG00000113522:131930561-131930736:target
KIF3A	ENSG00000131437	chr5	-	132038249	132038360	132037778	132037904	132036228	132036392	ENSG00000131437:132036228-132036392:source	ENSG00000131437:132038250-132038360:target
AFF4	ENSG00000072364	chr5	-	132223212	132223284	132222001	132222095	132220768	132220811	ENSG00000072364:132220768-132220811:source	ENSG00000072364:132223213-132223284:target
AFF4	ENSG00000072364	chr5	-	132298950	132299326	132273340	132273432	132272759	132272885	ENSG00000072364:132272759-132272885:source	ENSG00000072364:132298951-132299326:target
HSPA4	ENSG00000170606	chr5	+	132387654	132388049	132397507	132397622	132400671	132400729	ENSG00000170606:132387654-132388049:source	ENSG00000170606:132400672-132400729:target
HSPA4	ENSG00000170606	chr5	+	132400672	132400729	132403108	132403249	132406065	132406188	ENSG00000170606:132400672-132400729:source	ENSG00000170606:132406066-132406188:target
HSPA4	ENSG00000170606	chr5	+	132403109	132403249	132406065	132406188	132408921	132409021	ENSG00000170606:132403109-132403249:source	ENSG00000170606:132408922-132409021:target
SEC24A	ENSG00000113615	chr5	+	134041017	134041127	134044402	134044578	134050713	134050851	ENSG00000113615:134041017-134041127:source	ENSG00000113615:134050714-134050851:target
DDX46	ENSG00000145833	chr5	+	134099594	134099782	134102606	134102750	134106592	134106689	ENSG00000145833:134099594-134099782:source	ENSG00000145833:134106593-134106689:target
DDX46	ENSG00000145833	chr5	+	134117741	134117776	134118634	134118755	134120055	134120488	ENSG00000145833:134117741-134117776:source	ENSG00000145833:134120056-134120488:target
KDM3B	ENSG00000120733	chr5	+	137721978	137722310	137726701	137727950	137728859	137729061	ENSG00000120733:137721978-137722310:source	ENSG00000120733:137728860-137729061:target
KDM3B	ENSG00000120733	chr5	+	137765938	137766114	137767113	137767248	137771308	137772717	ENSG00000120733:137765938-137766114:source	ENSG00000120733:137771309-137772717:target
HSPA9	ENSG00000113013	chr5	-	137897268	137897478	137896469	137896620	137895409	137895780	ENSG00000113013:137895409-137895780:source	ENSG00000113013:137897269-137897478:target
ANKHD1	ENSG00000131503	chr5	+	139886420	139886562	139887369	139887583	139889221	139889397	ENSG00000131503:139886420-139886562:source	ENSG00000131503:139889222-139889397:target
IK	ENSG00000113141	chr5	+	140027899	140028122	140028467	140028565	140031298	140031391	ENSG00000113141:140027899-140028122:source	ENSG00000113141:140031299-140031391:target
HARS	ENSG00000170445	chr5	-	140057492	140057600	140057239	140057338	140056912	140057005	ENSG00000170445:140056912-140057005:source	ENSG00000170445:140057493-140057600:target
DIAPH1	ENSG00000131504	chr5	-	140903709	140903796	140898510	140898563	140894583	140896575	ENSG00000131504:140894583-140896575:source	ENSG00000131504:140903710-140903796:target
DIAPH1	ENSG00000131504	chr5	-	140913901	140914055	140909169	140909264	140908739	140908840	ENSG00000131504:140908739-140908840:source	ENSG00000131504:140913902-140914055:target
ARHGAP26	ENSG00000145819	chr5	+	142258939	142259010	142264862	142264964	142273802	142273913	ENSG00000145819:142258939-142259010:source	ENSG00000145819:142273803-142273913:target
LARS	ENSG00000133706	chr5	-	145519766	145519824	145519178	145519266	145515164	145515227	ENSG00000133706:145515164-145515227:source	ENSG00000133706:145519767-145519824:target
RBM27	ENSG00000091009	chr5	+	145583113	145583387	145598547	145598666	145602965	145603090	ENSG00000091009:145583113-145583387:source	ENSG00000091009:145602966-145603090:target
RBM27	ENSG00000091009	chr5	+	145634506	145634655	145638011	145638156	145640307	145640461	ENSG00000091009:145634506-145634655:source	ENSG00000091009:145640308-145640461:target
PPP2R2B	ENSG00000156475	chr5	-	145972533	145972625	145971611	145971756	145967936	145969789	ENSG00000156475:145967936-145969789:source	ENSG00000156475:145972534-145972625:target
JAKMIP2	ENSG00000176049	chr5	-	147003183	147003252	147000228	147000306	146997474	146997677	ENSG00000176049:146997474-146997677:source	ENSG00000176049:147003184-147003252:target
JAKMIP2	ENSG00000176049	chr5	-	147040510	147041009	147029900	147030110	147027939	147028037	ENSG00000176049:147027939-147028037:source	ENSG00000176049:147040511-147041009:target
FBXO38	ENSG00000145868	chr5	+	147785820	147785957	147787181	147787464	147788686	147788783	ENSG00000145868:147785820-147785957:source	ENSG00000145868:147788687-147788783:target
CSNK1A1	ENSG00000113712	chr5	-	148892632	148892784	148891356	148891435	148889442	148889516	ENSG00000113712:148889442-148889516:source	ENSG00000113712:148892633-148892784:target
DCTN4	ENSG00000132912	chr5	-	150135978	150136049	150135092	150135129	150133041	150133219	ENSG00000132912:150133041-150133219:source	ENSG00000132912:150135979-150136049:target
ANXA6	ENSG00000197043	chr5	-	150527444	150527487	150519713	150519804	150518914	150519008	ENSG00000197043:150518914-150519008:source	ENSG00000197043:150527445-150527487:target
SLC36A1	ENSG00000123643	chr5	+	150838349	150838496	150839334	150839425	150843113	150843204	ENSG00000123643:150838349-150838496:source	ENSG00000123643:150843114-150843204:target
FAM114A2	ENSG00000055147	chr5	-	153374478	153374867	153374151	153374303	153370670	153372670	ENSG00000055147:153369688-153372670:source	ENSG00000055147:153374479-153374867:target
RNF145	ENSG00000145860	chr5	-	158621723	158621832	158608967	158609059	158603640	158603875	ENSG00000145860:158603640-158603875:source	ENSG00000145860:158621724-158621832:target
RNF145	ENSG00000145860	chr5	-	158636238	158636559	158630441	158630664	158621724	158621832	ENSG00000145860:158621724-158621832:source	ENSG00000145860:158636239-158636559:target
TTC1	ENSG00000113312	chr5	+	159470140	159470176	159476520	159476669	159478135	159478190	ENSG00000113312:159470140-159470176:source	ENSG00000113312:159478136-159478190:target
RARS	ENSG00000113643	chr5	+	167924017	167924353	167924951	167925051	167927595	167927725	ENSG00000113643:167924017-167924353:source	ENSG00000113643:167927596-167927725:target
DOCK2	ENSG00000134516	chr5	+	169435501	169435601	169435691	169435750	169445963	169446112	ENSG00000134516:169435501-169435601:source	ENSG00000134516:169445964-169446112:target
STK10	ENSG00000072786	chr5	-	171479932	171480204	171472429	171472484	171470026	171472026	ENSG00000072786:171469077-171472026:source	ENSG00000072786:171479933-171480204:target
UIMC1	ENSG00000087206	chr5	-	176378474	176378578	176372037	176372139	176370328	176370489	ENSG00000087206:176370328-176370489:source	ENSG00000087206:176378475-176378578:target
FLT4	ENSG00000037280	chr5	-	180043899	180043994	180043366	180043489	180041068	180041179	ENSG00000037280:180041068-180041179:source	ENSG00000037280:180043900-180043994:target
