# Supplementary material for: Ancient antagonism between CELF and RBFOX families tunes mRNA splicing outcomes
Source: HighWire-hosted journal article supplement (doi:10.1101/gr.220517.117), 2017-05-16
Supplement: Supplemental_Table_S2.xlsx [file Supplemental_Table_S2.xlsx]

## Sheet: LEGEND
Supplemental Table S2: Hypergeometric -log(p-value) for enriched occurrences of all pentamers located within 300 nt upstream or downstream of alternative exons that were CELF2-repressed or CELF2-enhanced, compared to unresponsive exons.

## Sheet: Repressed
#Pentamer	-log10(p-value) upstream intron	-log10(p-value) downstream intron
AAAAA	0.634042	0.498234
AAAAC	0.529769	0
AAAAG	0.502365	0.385471
AAAAT	1.13802	1.26691
AAACA	0.0792097	0.0791533
AAACC	0.821439	0.450154
AAACG	0.0561857	0.77334
AAACT	1.30079	0.0787467
AAAGA	0	0.522465
AAAGC	0.0275742	0.273766
AAAGG	0.567113	0.11578
AAAGT	0.195659	0.0244861
AAATA	0.36959	0.409212
AAATC	0.797064	0.115806
AAATG	0.902371	0.225568
AAATT	0.0235268	0.160282
AACAA	0.152871	1.01673
AACAC	0.102222	0.636082
AACAG	1.15833	0.305482
AACAT	0.112258	0.359007
AACCA	0.126712	0.601719
AACCC	0.138999	0.064129
AACCG	0.748536	0.85201
AACCT	1.06441	0.118862
AACGA	0.52607	0.347017
AACGC	0.296572	1.33922
AACGG	0.137706	0.954596
AACGT	0.617987	0
AACTA	0.598929	0.209339
AACTC	0.380458	0.316774
AACTG	0.118198	0.713458
AACTT	0.0518084	0.59068
AAGAA	0.0769767	1.11746
AAGAC	0.394219	0.390308
AAGAG	1.78693	0.0827698
AAGAT	0.0525044	0.779252
AAGCA	0.971173	0.335295
AAGCC	0.575081	0.260263
AAGCG	0.533438	0.0560555
AAGCT	0.50154	0.260165
AAGGA	0.026383	0.147161
AAGGC	0.402113	0.166459
AAGGG	0.0595662	0.360432
AAGGT	0.52091	0.368208
AAGTA	0.723805	0.803991
AAGTC	0.505585	0.306292
AAGTG	0.0249819	0.403884
AAGTT	0.170328	0.680874
AATAA	1.45232	0
AATAC	1.01487	0.718587
AATAG	0.49124	0.0837483
AATAT	0.0765678	0.103808
AATCA	0.0559699	0.818011
AATCC	0.170632	0.124132
AATCG	0.379668	0
AATCT	1.33523	0.333173
AATGA	0.68173	0.204547
AATGC	0.24543	0.973318
AATGG	0.672671	0.681653
AATGT	0.702913	0.309423
AATTA	0.418579	0.418383
AATTC	1.12224	0.290401
AATTG	0.699337	1.11326
AATTT	0	0.679997
ACAAA	0.402977	1.96073
ACAAC	0.0766299	0
ACAAG	0	0.805769
ACAAT	0.616309	0.205084
ACACA	0.059177	0.124286
ACACC	0.0689041	1.42195
ACACG	0.745565	0.323917
ACACT	0.243486	1.76145
ACAGA	0.759283	0.176318
ACAGC	0.0627214	0.0292805
ACAGG	1.24626	1.05394
ACAGT	0.631898	0
ACATA	0.35321	0.119561
ACATC	0.461372	0.186398
ACATG	0.437916	0.148663
ACATT	0.348501	1.01771
ACCAA	0.31598	0.638582
ACCAC	1.6399	0.443766
ACCAG	0.421111	0.0862986
ACCAT	0.0566098	0.23006
ACCCA	0.210422	0.203054
ACCCC	1.00803	0.514437
ACCCG	0.232941	0.26126
ACCCT	0.200287	1.4335
ACCGA	0.0785611	0.364875
ACCGC	0	0.849487
ACCGG	1.05117	1.79771
ACCGT	0.426518	0
ACCTA	0.648073	0.0691532
ACCTC	1.46746	0.903562
ACCTG	1.11871	0.677573
ACCTT	0.0544606	0.0267458
ACGAA	0.143322	1.26939
ACGAC	0.239725	0.218996
ACGAG	0	0.28188
ACGAT	0.0708915	1.34424
ACGCA	0.263394	0.140956
ACGCC	1.05872	0.629502
ACGCG	0	2.06775
ACGCT	0.136061	0.72292
ACGGA	0.52607	0
ACGGC	0.38146	0.816082
ACGGG	0	0
ACGGT	0.693627	0.285769
ACGTA	0.213255	0
ACGTC	0.613348	0.414936
ACGTG	0.463125	0.145943
ACGTT	0.0960717	0
ACTAA	0	0.757986
ACTAC	0.315614	0
ACTAG	0	0.189304
ACTAT	0.0299391	0.0977373
ACTCA	0.0290917	0
ACTCC	2.69013	0.386832
ACTCG	0	0.321565
ACTCT	0.802541	1.53044
ACTGA	0.43788	0.59887
ACTGC	1.14193	0.345302
ACTGG	0.200833	0.326279
ACTGT	0.283998	0.651719
ACTTA	0.760113	0.0864247
ACTTC	0.452515	0.504436
ACTTG	0.115317	0.0266848
ACTTT	0.132013	0.494546
AGAAA	0.840296	0.413007
AGAAC	0.206732	1.74775
AGAAG	0.113882	0.50511
AGAAT	0.43042	0.665451
AGACA	1.58135	1.12685
AGACC	1.22694	0.429289
AGACG	0.053647	0.432769
AGACT	0.658008	0.0917251
AGAGA	3.1161	2.09922
AGAGC	0.241596	0.925495
AGAGG	0.909488	0.723674
AGAGT	1.91377	1.17222
AGATA	0.0268672	1.36194
AGATC	0.0310015	0.862838
AGATG	0.84084	0.0809541
AGATT	0.394878	0.285345
AGCAA	0.989805	0.157184
AGCAC	0.593309	1.347
AGCAG	0.379752	0.217405
AGCAT	0.389659	1.12561
AGCCA	0.553027	1.62473
AGCCC	1.54952	0.0618724
AGCCG	0.560356	0
AGCCT	1.86752	1.13989
AGCGA	0.323917	0.112284
AGCGC	0.134127	1.14493
AGCGG	0.298815	3.2015
AGCGT	1.26922	0.459499
AGCTA	0.236326	0.276845
AGCTC	0.165107	0.120527
AGCTG	1.3065	0.0245469
AGCTT	0.0544719	0.560789
AGGAA	0.396286	0.311569
AGGAC	0.182435	0.372592
AGGAG	0.212534	3.22431
AGGAT	1.22401	0.270986
AGGCA	1.71381	0.445432
AGGCC	0.0622833	0
AGGCG	0.0873861	1.18259
AGGCT	3.33088	2.53683
AGGGA	0.0850942	1.05251
AGGGC	0.259588	0.170632
AGGGG	0.396665	0.314358
AGGGT	1.10279	1.0562
AGGTA	0	0.505586
AGGTC	0.141894	0.0302602
AGGTG	0.98343	1.5213
AGGTT	0.750222	0.807479
AGTAA	0.727281	0.666526
AGTAC	1.07338	0.673613
AGTAG	1.15833	2.55983
AGTAT	0	0.252194
AGTCA	0.124145	0.276065
AGTCC	0.414955	2.5114
AGTCG	0.471882	1.33097
AGTCT	3.24733	0.25205
AGTGA	2.87699	1.73227
AGTGC	0.121039	1.4364
AGTGG	0	0.0797196
AGTGT	0.614145	1.27929
AGTTA	1.00294	0.491212
AGTTC	0.273009	0.959627
AGTTG	0.0265107	0.185588
AGTTT	0.226712	0.591082
ATAAA	0.860895	1.09468
ATAAC	0.136433	0.175215
ATAAG	0.807198	0.0283999
ATAAT	0.0507358	0.272105
ATACA	0.15313	0.877808
ATACC	0.479494	0.956473
ATACG	0.210475	1.39202
ATACT	0.917265	0
ATAGA	0.677588	0.188619
ATAGC	0.066967	0.566022
ATAGG	1.32313	0.402113
ATAGT	0.436143	0.35321
ATATA	1.14447	0.173612
ATATC	0.0960543	0.509396
ATATG	0.43279	0.184672
ATATT	0.33581	1.02486
ATCAA	0	0.169207
ATCAC	0	0.797327
ATCAG	0.765778	0.239657
ATCAT	0.0271181	2.14273
ATCCA	0.341192	1.01653
ATCCC	0.500495	0.655471
ATCCG	0.219358	0.632652
ATCCT	0.0274333	0.185588
ATCGA	0.681495	0.0763004
ATCGC	1.00073	0.0692583
ATCGG	0.174477	0.976464
ATCGT	0.459499	0.339586
ATCTA	0	0.629918
ATCTC	0.225879	0.920831
ATCTG	0.731661	0.586967
ATCTT	0	0.575494
ATGAA	0	0.439311
ATGAC	0.410305	0.064129
ATGAG	0.694141	0.0861747
ATGAT	0.214375	0.11453
ATGCA	0.824586	1.51368
ATGCC	0.985001	0.371177
ATGCG	0.353967	0.693627
ATGCT	0.394162	1.72413
ATGGA	0.62242	0.432413
ATGGC	0	0.375872
ATGGG	0	0.191141
ATGGT	0.440597	0.304575
ATGTA	0.326976	0.0524438
ATGTC	1.38544	0.898266
ATGTG	1.37423	0.282776
ATGTT	1.72817	0.228397
ATTAA	0.468294	0.0244044
ATTAC	0.59581	0.501354
ATTAG	0.0549342	0.435297
ATTAT	0.56774	0.0774938
ATTCA	1.68793	0.41464
ATTCC	1.75576	0.158147
ATTCG	1.36885	0.832184
ATTCT	0.550507	0.0490533
ATTGA	0.176318	0.186106
ATTGC	0.19295	0.161518
ATTGG	0.166363	0.0591858
ATTGT	0.84241	0.979105
ATTTA	0.130613	0.586475
ATTTC	0.969027	0.608696
ATTTG	0.26322	0.416731
ATTTT	0.242915	0.234499
CAAAA	0.303295	0.385347
CAAAC	0.0986054	0
CAAAG	0.567392	0.435297
CAAAT	0.249488	0.0527033
CAACA	0.73535	0
CAACC	0.320942	1.10063
CAACG	0.0910255	0
CAACT	1.36488	1.70906
CAAGA	1.19361	2.19939
CAAGC	0.598673	0.21404
CAAGG	0.173651	0.747459
CAAGT	0.124092	0.820966
CAATA	0.101387	0.264331
CAATC	0.744669	0.0370135
CAATG	0.415963	1.08115
CAATT	1.10884	0.543996
CACAA	0.595342	0.297606
CACAC	0.170632	1.68193
CACAG	0.561539	0.217519
CACAT	0.15345	0.0563993
CACCA	0.186646	0.543936
CACCC	1.48272	0.383205
CACCG	0	1.3682
CACCT	1.10663	0.418785
CACGA	0	0.181784
CACGC	0.0478269	0.386222
CACGG	1.40374	0
CACGT	0	0.266662
CACTA	0.144901	0.427541
CACTC	0.90053	0.81633
CACTG	0.0775513	0
CACTT	0.176971	0.27674
CAGAA	0.0521427	0.445296
CAGAC	0.651189	1.42195
CAGAG	1.58842	0
CAGAT	0.698637	0.299551
CAGCA	0.678702	0.723261
CAGCC	0.815104	0.728535
CAGCG	0.242865	1.73252
CAGCT	0.868287	0.206421
CAGGA	1.26401	1.51968
CAGGC	2.05796	1.70046
CAGGG	0	0.113236
CAGGT	0.156181	0.302985
CAGTA	0.125862	0.089997
CAGTC	0.213886	0
CAGTG	0.275563	0.770551
CAGTT	0.327304	0.175452
CATAA	0.787998	0.305482
CATAC	0.334442	0.412656
CATAG	0.059813	0.439871
CATAT	0.769894	0
CATCA	1.11119	0.852479
CATCC	0.0967365	0.513079
CATCG	0.344327	1.07776
CATCT	0.11224	0
CATGA	0.824	0.391884
CATGC	0.167106	2.59963
CATGG	0	1.29561
CATGT	0.454668	0.0250801
CATTA	0.485214	0.0867339
CATTC	1.69619	0.59644
CATTG	0.084678	0.520468
CATTT	0.130068	0.892487
CCAAA	1.37258	0.0838612
CCAAC	0.0342743	0.0334916
CCAAG	1.78692	0.555963
CCAAT	0.74492	0.113643
CCACA	1.68421	0.120527
CCACC	1.04755	0.759772
CCACG	0.622755	0.273821
CCACT	1.5019	0.156239
CCAGA	0.408665	0.88632
CCAGC	1.44676	0.0516457
CCAGG	0.656091	1.69041
CCAGT	0.120745	0.188721
CCATA	0.57654	0.0653839
CCATC	0.126761	0.325706
CCATG	0.119634	0.930326
CCATT	0.782239	0.681367
CCCAA	0.120322	1.10265
CCCAC	0.199489	0.0584143
CCCAG	2.25741	1.72552
CCCAT	0.279771	0.723015
CCCCA	0.521004	0
CCCCC	0.960946	0.731414
CCCCG	1.05943	1.8424
CCCCT	1.66125	1.53186
CCCGA	0	0.549509
CCCGC	1.68158	0.956753
CCCGG	0.568	0.0869592
CCCGT	1.03219	0.710887
CCCTA	0.898799	0.301416
CCCTC	0	0.0893663
CCCTG	2.79748	2.74925
CCCTT	0.947532	1.01446
CCGAA	0.249592	0.0770331
CCGAC	0.165336	0.245135
CCGAG	0.198894	0.587185
CCGAT	1.33922	0.52392
CCGCA	1.32834	1.54113
CCGCC	1.60972	0.829932
CCGCG	1.22748	1.67848
CCGCT	0.397543	2.13135
CCGGA	0.242119	1.49279
CCGGC	0	0.438959
CCGGG	0.187426	0.544368
CCGGT	0.980026	0.551405
CCGTA	0.131125	0.335909
CCGTC	0	0.103942
CCGTG	1.73472	1.39009
CCGTT	0.119445	0.573132
CCTAA	0.552111	0.702253
CCTAC	0	0.078973
CCTAG	0.176852	0.170986
CCTAT	0.145858	0.272247
CCTCA	1.9285	0.815027
CCTCC	0.209919	0.692721
CCTCG	0.382117	0.341395
CCTCT	0.922414	0.799963
CCTGA	0.61455	0
CCTGC	0.336101	0.698481
CCTGG	1.30805	0.231277
CCTGT	0.351216	0.105695
CCTTA	0.0583468	0.633162
CCTTC	0.372829	1.56617
CCTTG	0.363228	1.0993
CCTTT	0.416033	0.197328
CGAAA	0.285769	1.09424
CGAAC	1.56335	2.15956
CGAAG	0.347017	0.423317
CGAAT	0.339586	0
CGACA	1.16094	0
CGACC	1.09658	0.280699
CGACG	0.207599	0.170901
CGACT	0.435977	1.03116
CGAGA	1.2785	0.0490114
CGAGC	1.07776	0.335909
CGAGG	0.556702	0.0482083
CGAGT	0.12035	0.609616
CGATA	0.64255	0
CGATC	1.41644	0.218646
CGATG	0.613348	1.09658
CGATT	0.129786	0
CGCAA	0.321603	0.0813144
CGCAC	0.0664153	0
CGCAG	0	0.0513002
CGCAT	1.39202	0.877137
CGCCA	0.713746	0.106204
CGCCC	0.58999	0.198894
CGCCG	1.72358	0.80789
CGCCT	0.589083	0.0362103
CGCGA	0.275875	0
CGCGC	0.247439	0.474868
CGCGG	1.30684	3.18762
CGCGT	1.0774	1.72469
CGCTA	0.307698	0.976464
CGCTC	0.0604352	0.0560555
CGCTG	1.13496	0.861646
CGCTT	0.097953	2.72107
CGGAA	1.03116	0.339586
CGGAC	0	0.816082
CGGAG	0.409919	0.107714
CGGAT	0.624021	0
CGGCA	0.813706	0.648071
CGGCC	0.762959	2.59731
CGGCG	1.3327	1.1206
CGGCT	0.297573	0.149523
CGGGA	0.280464	0.0478269
CGGGC	1.02286	0.96092
CGGGG	0.903622	0.680242
CGGGT	0.0519545	0.517463
CGGTA	1.53552	0.0916776
CGGTC	3.22395	0.961326
CGGTG	0.245287	0.378773
CGGTT	0.0610925	0.0770097
CGTAA	1.00969	0.390603
CGTAC	0.52392	0.650023
CGTAG	1.31631	0
CGTAT	0.284142	0.349221
CGTCA	0.0681927	0.409164
CGTCC	2.32298	0.279019
CGTCG	0.325418	0.325418
CGTCT	0.864226	0.525484
CGTGA	0.199969	0.0478269
CGTGC	0.224175	1.38024
CGTGG	0.741372	0.0831672
CGTGT	2.00725	1.33582
CGTTA	0	0.0641213
CGTTC	0.0571218	0.885229
CGTTG	1.13496	0.0641213
CGTTT	0.3085	0.498759
CTAAA	0.510342	0.147822
CTAAC	0.149843	2.87692
CTAAG	0.578894	0
CTAAT	0	0.26277
CTACA	0.136416	0.210059
CTACC	0.0728527	0.557475
CTACG	0	0
CTACT	0.767311	0.578038
CTAGA	0.0305251	0.0298001
CTAGC	0.165587	1.17433
CTAGG	0.282113	0.53998
CTAGT	0.0650071	0.183494
CTATA	1.11821	0.813598
CTATC	1.64659	0.644858
CTATG	0.374854	0.364571
CTATT	1.18424	0.118443
CTCAA	2.85642	0.0889183
CTCAC	0.189664	0.178556
CTCAG	3.41063	0.0497367
CTCAT	0.338834	0.966156
CTCCA	0.0814523	0.147083
CTCCC	0.2091	0.285345
CTCCG	0.639824	0.1621
CTCCT	0.426831	0.822748
CTCGA	0.168622	0.743606
CTCGC	0.12148	0.77334
CTCGG	0.54743	0.0420811
CTCGT	1.23604	0.192569
CTCTA	0.161409	0.117867
CTCTC	0.42697	3.55544
CTCTG	0.46564	0.133205
CTCTT	0.748027	0.94483
CTGAA	0.052491	0.659578
CTGAC	0.125828	0.568451
CTGAG	1.87638	1.07193
CTGAT	0.387744	0.355131
CTGCA	1.36843	0.410715
CTGCC	0.322597	1.1435
CTGCG	4.33139	0.16797
CTGCT	0.140108	1.28833
CTGGA	0.377296	0.140682
CTGGC	0.0834708	0.21153
CTGGG	1.42696	1.42181
CTGGT	0.146959	1.03938
CTGTA	0.500508	0.54494
CTGTC	0.174874	0.174195
CTGTG	1.38035	0.266641
CTGTT	1.58305	2.19863
CTTAA	0.550189	0.0257217
CTTAC	0.297809	0.654848
CTTAG	0.636333	0.158147
CTTAT	0.0814523	0.181504
CTTCA	0.0538269	1.25417
CTTCC	0.85588	0.444942
CTTCG	0.186706	1.44105
CTTCT	0.195918	0.606816
CTTGA	1.17644	0.586446
CTTGC	0.98868	2.16693
CTTGG	0.69506	0.402263
CTTGT	1.31188	0.558442
CTTTA	0.106775	0.668545
CTTTC	2.25385	1.42335
CTTTG	0.650593	0.789693
CTTTT	0.30602	0.131307
GAAAA	0.545986	0.132661
GAAAC	1.90689	0.056975
GAAAG	0.0258559	0.0833986
GAAAT	0.167715	0.0495718
GAACA	0.0944185	0.526905
GAACC	1.23147	0
GAACG	0.5909	1.3895
GAACT	1.27015	0.5011
GAAGA	1.52809	0
GAAGC	1.40596	0.353086
GAAGG	0.678063	0.662731
GAAGT	0.155036	0.494211
GAATA	0.225862	0.116754
GAATC	0.53374	0.224301
GAATG	0.223495	0.484377
GAATT	0.844121	0.0251583
GACAA	0.326947	0.502588
GACAC	0.111191	1.57413
GACAG	0.494419	1.02425
GACAT	0.500604	0.486154
GACCA	0.483798	0.287589
GACCC	0.503792	0.533115
GACCG	0.681495	0
GACCT	2.16658	0.134345
GACGA	0.296572	1.43366
GACGC	0.17883	0.538447
GACGG	0.436274	0.679208
GACGT	2.29953	0.367895
GACTA	0.658479	0.295547
GACTC	0.419656	0.383326
GACTG	0	0.560236
GACTT	0.156216	0.119889
GAGAA	1.92844	0.0250863
GAGAC	1.97969	1.73726
GAGAG	0.612543	0.11962
GAGAT	2.11675	1.15797
GAGCA	1.16348	1.84761
GAGCC	0.599453	0.617669
GAGCG	0.518161	2.26989
GAGCT	0.512787	0
GAGGA	0.952721	0
GAGGC	1.20394	0.685502
GAGGG	0.122532	0.122528
GAGGT	0.603847	1.43658
GAGTA	1.14641	0.683603
GAGTC	0.621327	0.742905
GAGTG	1.13367	1.49055
GAGTT	2.9852	2.5166
GATAA	0.029038	0.472497
GATAC	0.251361	0.0342972
GATAG	0.141953	1.16879
GATAT	0	1.40318
GATCA	0.527213	1.72737
GATCC	1.42132	1.33208
GATCG	0	0.242119
GATCT	0.245396	0.16743
GATGA	0.759338	0.852961
GATGC	0.0346158	0.920661
GATGG	0.835695	1.28689
GATGT	0.0580431	0.0912173
GATTA	0.420886	1.49061
GATTC	0.610584	0.128541
GATTG	0.380458	0.211024
GATTT	0.197851	0.574832
GCAAA	0.200322	0.62849
GCAAC	1.03785	0.353852
GCAAG	0.138818	0.467487
GCAAT	0.240104	0.280799
GCACA	0.0300875	0.164947
GCACC	0	1.58029
GCACG	0.125395	0.72487
GCACT	0.243207	0.119266
GCAGA	1.62188	0.39255
GCAGC	0.553319	0.590098
GCAGG	0.191141	0.115841
GCAGT	0.027012	0.855964
GCATA	0.832396	0.224862
GCATC	1.39048	0.972894
GCATG	0.122312	3.58639
GCATT	0.675959	0.421309
GCCAA	0.47775	0
GCCAC	0.703483	0.516682
GCCAG	1.41652	0.255287
GCCAT	0.0599681	0.091578
GCCCA	0.583037	0.797554
GCCCC	1.83314	2.3969
GCCCG	0.613721	0.456508
GCCCT	2.47786	0.380077
GCCGA	0.530573	0.181784
GCCGC	3.68721	1.65729
GCCGG	0.238841	0.207024
GCCGT	0.36537	1.38055
GCCTA	0.200635	1.0589
GCCTC	0.185625	0.177074
GCCTG	0.202759	0.353683
GCCTT	0.26003	0.346353
GCGAA	0.0800563	0.0899816
GCGAC	0	0.389421
GCGAG	0.115118	0.916087
GCGAT	0.877205	0.286733
GCGCA	0.0664153	0
GCGCC	0.82555	0.0991719
GCGCG	0.593859	0.174477
GCGCT	2.19576	0.641709
GCGGA	0.814398	0.389304
GCGGC	4.16591	3.41185
GCGGG	0.103222	0.203517
GCGGT	0.569747	0.28188
GCGTA	2.70564	0
GCGTC	3.67234	1.19847
GCGTG	0.676889	0.0831157
GCGTT	0.795081	0.149732
GCTAA	1.29651	0.482194
GCTAC	0.16055	1.18696
GCTAG	0	0.0353386
GCTAT	0.428534	0.0317598
GCTCA	1.39738	0.324469
GCTCC	1.97266	0.897167
GCTCG	0.87053	1.19847
GCTCT	1.51354	0.149326
GCTGA	1.83099	0.0265115
GCTGC	0.863712	0.701585
GCTGG	1.05241	0.272446
GCTGT	0.624309	1.56617
GCTTA	0.292307	0.335742
GCTTC	1.03448	1.10884
GCTTG	0.192545	0.156112
GCTTT	0.198632	1.11652
GGAAA	0.140215	0.435119
GGAAC	0.524045	0.64883
GGAAG	1.09035	0.115687
GGAAT	0	0.15313
GGACA	0.0995106	0.0976542
GGACC	0.567938	0.272054
GGACG	0.147052	1.11418
GGACT	0	0.300304
GGAGA	0.989812	0.736446
GGAGC	1.08321	0.170632
GGAGG	0.333559	2.58312
GGAGT	1.90854	1.78386
GGATA	1.10558	0.567365
GGATC	0	1.00126
GGATG	0.75398	0.251564
GGATT	0.252216	0.983649
GGCAA	1.3387	0.53427
GGCAC	0.180266	0.385695
GGCAG	0	0.608075
GGCAT	0.124926	0.397083
GGCCA	0.568777	0
GGCCC	0	0.725724
GGCCG	0.248894	0.261687
GGCCT	0.187584	0.271102
GGCGA	0.352876	0.707214
GGCGC	0.518161	0.219582
GGCGG	1.43932	0.929376
GGCGT	0.324799	0.492915
GGCTA	0.509296	2.0355
GGCTC	1.10928	0.217418
GGCTG	2.10106	0.518309
GGCTT	1.03918	0.147852
GGGAA	0.0539862	0.182828
GGGAC	1.5466	0.636607
GGGAG	0.461235	0.918742
GGGAT	0.555963	0.0573383
GGGCA	0.753888	0.591265
GGGCC	0.273106	0.176611
GGGCG	0.9214	0.0934325
GGGCT	0.0284081	0.12028
GGGGA	0.0906259	1.15982
GGGGC	0.457563	0.674294
GGGGG	0.0324032	1.41796
GGGGT	0.334857	0.279771
GGGTA	0.70304	0.580742
GGGTC	0.193538	0.0676135
GGGTG	0.312508	0.257247
GGGTT	0.319056	0.966591
GGTAA	0.325324	0.108082
GGTAC	0.136736	0
GGTAG	0	0.0315359
GGTAT	0	1.65953
GGTCA	0.944238	0.292183
GGTCC	2.13114	0.0351277
GGTCG	0.504109	0.160298
GGTCT	0.563852	0.0569833
GGTGA	0.924388	1.26454
GGTGC	0.332728	0.0289415
GGTGG	0.148445	0.111413
GGTGT	0.0572864	0.0276002
GGTTA	0.472732	0.238329
GGTTC	0	0.813598
GGTTG	0.201268	0.334279
GGTTT	0.139738	0.0517872
GTAAA	0.519614	0.240975
GTAAC	0.0722146	0.0652113
GTAAG	0.346164	2.78696
GTAAT	1.24626	0.206775
GTACA	0.0313338	0.684287
GTACC	0.120446	0.306298
GTACG	0.201377	0.648071
GTACT	0	1.0885
GTAGA	1.71962	0.488136
GTAGC	2.0633	1.43514
GTAGG	0.493632	0.210225
GTAGT	0.210167	0.821484
GTATA	0.495182	0.402771
GTATC	0.0701758	0.440401
GTATG	0.257325	0.231414
GTATT	0.0246453	2.15182
GTCAA	0.145391	0
GTCAC	0.136576	0.102028
GTCAG	0.208328	0
GTCAT	0.0291306	0.195276
GTCCA	1.31157	0.605947
GTCCC	0.313487	1.32191
GTCCG	1.36885	0.259411
GTCCT	2.67372	0.637456
GTCGA	0.0910255	0.612342
GTCGC	1.29848	0.231774
GTCGG	1.3895	1.17212
GTCGT	1.13122	0
GTCTA	0.148418	0.214724
GTCTC	0.0253179	0.331926
GTCTG	1.39776	0.310682
GTCTT	0.239631	0.243767
GTGAA	0.259798	0.332989
GTGAC	1.03771	0.0306064
GTGAG	3.98552	1.60615
GTGAT	0.0831406	1.03997
GTGCA	0.643817	0.26003
GTGCC	0.479892	0.236918
GTGCG	4.7706	0.24015
GTGCT	1.49194	0.920831
GTGGA	0.431243	0.465488
GTGGC	0.0283023	0.363228
GTGGG	0.533868	0.2116
GTGGT	0.228326	0.216872
GTGTA	1.16552	0.161518
GTGTC	4.61764	0.0295803
GTGTG	0	0.500512
GTGTT	1.34781	0.733879
GTTAA	0	0.84798
GTTAC	1.10558	0.0325323
GTTAG	1.41842	1.15091
GTTAT	0.19146	0.278835
GTTCA	0.027588	1.79962
GTTCC	0.992952	0.518125
GTTCG	0.757789	0
GTTCT	0.052541	0.932725
GTTGA	1.35734	0.163863
GTTGC	0.635003	0.0599986
GTTGG	0.0275742	0.310469
GTTGT	1.21542	0.449472
GTTTA	0.90343	0.659215
GTTTC	0.313833	0
GTTTG	1.13607	1.9846
GTTTT	0.844517	0.191309
TAAAA	0.369323	1.2604
TAAAC	0.0895668	0.837627
TAAAG	1.0584	0.602941
TAAAT	0.226867	0.0754592
TAACA	0	0.0868329
TAACC	1.12285	1.53586
TAACG	0.662309	0.0648296
TAACT	0.026627	0.641253
TAAGA	0.915868	0.110865
TAAGC	1.75544	0.254425
TAAGG	0.257325	0.431807
TAAGT	0.340603	1.22212
TAATA	0.203977	0.241949
TAATC	0.767286	0.224473
TAATG	0.112771	0.597884
TAATT	0.45179	0.450972
TACAA	0.0576664	0.974236
TACAC	0.436062	0
TACAG	0.996509	0.719603
TACAT	0.697599	1.34323
TACCA	0.0995106	0.0623186
TACCC	0.168282	0.461372
TACCG	0	0.17883
TACCT	0.0580583	0.989447
TACGA	0.205959	2.65591
TACGC	0.0910255	0.136061
TACGG	1.17412	1.01124
TACGT	0.30033	0.109464
TACTA	0.448884	0.248913
TACTC	2.30487	0.182436
TACTG	0.314649	1.60429
TACTT	0.489377	0.314257
TAGAA	0.543049	0.486991
TAGAC	0.540582	0.0728527
TAGAG	3.0573	2.48704
TAGAT	0.155036	0.35516
TAGCA	0.243409	0
TAGCC	0.951543	2.12673
TAGCG	0.145364	0.263394
TAGCT	0.754277	0.670114
TAGGA	0.196112	2.39147
TAGGC	0.839741	0.429536
TAGGG	0.37273	0.721738
TAGGT	0.175291	0.206648
TAGTA	1.67549	2.36725
TAGTC	1.54823	0.852534
TAGTG	0.126594	0.122111
TAGTT	0.3255	0.0262212
TATAA	0.279692	0.169113
TATAC	0.175291	0.0302068
TATAG	0.3466	0.848477
TATAT	0.139965	0.312563
TATCA	0.908602	0.0595146
TATCC	0.383326	0.56137
TATCG	0	0.190959
TATCT	0.292963	0.333592
TATGA	0.227184	0.408356
TATGC	0.0318157	0
TATGG	0.300286	0.205015
TATGT	2.67983	0.476063
TATTA	0.140682	0.692721
TATTC	1.10352	1.65633
TATTG	0.0261225	0.0262212
TATTT	0.605646	0.743371
TCAAA	0.312563	0.0801809
TCAAC	0.494023	0.608235
TCAAG	1.82868	1.84449
TCAAT	0.344036	1.59254
TCACA	0.587607	0
TCACC	0.465488	0
TCACG	0.0491466	0.201709
TCACT	0	0.0508235
TCAGA	0.466163	0.407461
TCAGC	0.0898989	0.635909
TCAGG	0.776426	1.05864
TCAGT	0.0831281	0.285208
TCATA	0.449038	0.487223
TCATC	0.0589599	0.767311
TCATG	0.755835	1.85741
TCATT	0.798952	0.133429
TCCAA	0.245317	0.165142
TCCAC	0.674294	0.295004
TCCAG	0.0248934	0.0529106
TCCAT	1.82998	2.46223
TCCCA	0.671934	2.97486
TCCCC	0.185192	0.317918
TCCCG	0.042632	0
TCCCT	0.816641	1.06869
TCCGA	0.156586	0.259411
TCCGC	0.0551112	1.11247
TCCGG	0.581924	0.295972
TCCGT	0.97315	0.854689
TCCTA	0.199881	0.416654
TCCTC	0.823802	0.332989
TCCTG	0.463021	0.0497074
TCCTT	1.65321	0.0241185
TCGAA	0.271345	0.609616
TCGAC	0.0848607	0.64255
TCGAG	0.370327	0.523069
TCGAT	0.154418	0.0770097
TCGCA	0.52607	0.268772
TCGCC	0.126834	0.0551112
TCGCG	0.114895	0.132473
TCGCT	0.394996	0.0519545
TCGGA	0.693911	0.707214
TCGGC	0.0508619	0.229732
TCGGG	0.172488	0.976369
TCGGT	1.2516	0.961326
TCGTA	0.928109	0
TCGTC	0.648071	0
TCGTG	0.426185	1.20806
TCGTT	0.52929	0.445108
TCTAA	0.0846837	0.118198
TCTAC	0.136467	0.495777
TCTAG	0.405664	0.287786
TCTAT	0.731924	0.0282315
TCTCA	1.05282	0.0502525
TCTCC	0.530165	1.12858
TCTCG	0.147117	0.815757
TCTCT	0.496551	0.965494
TCTGA	0	0.0796068
TCTGC	0.0254007	1.63766
TCTGG	0.249108	1.1938
TCTGT	0.495099	0.33231
TCTTA	0.105397	0.172562
TCTTC	0.200744	0.0512632
TCTTG	1.95125	0
TCTTT	0.699252	1.47091
TGAAA	0.261637	1.20609
TGAAC	0.353058	0.688585
TGAAG	0.0255791	0.459238
TGAAT	0.733751	0.674997
TGACA	0.806523	0.190401
TGACC	0.334304	0.128636
TGACG	0.704532	0.140688
TGACT	0.694473	0
TGAGA	1.6755	0.265216
TGAGC	4.21858	0.375464
TGAGG	1.71684	0.316665
TGAGT	1.42305	1.28286
TGATA	0.753036	0.440399
TGATC	0.876162	0.0591858
TGATG	0.11526	0.348776
TGATT	0.104572	0.203395
TGCAA	0.331112	0.193554
TGCAC	0.198902	0.0621487
TGCAG	0.718282	0.433995
TGCAT	0.471622	5.50085
TGCCA	0.71235	0.338251
TGCCC	1.03714	0.424801
TGCCG	1.14662	1.59601
TGCCT	0.0772875	0.424421
TGCGA	0.0708915	0.613348
TGCGC	2.15118	0.180792
TGCGG	1.24709	0.178482
TGCGT	3.97965	0.242865
TGCTA	0.43748	0.580765
TGCTC	1.05692	2.36757
TGCTG	0.024271	1.57516
TGCTT	1.64851	0.196394
TGGAA	0.940457	0.58058
TGGAC	0.949764	0.565831
TGGAG	0.45708	0.790894
TGGAT	0.775138	0
TGGCA	0.053728	0.508908
TGGCC	0.0555211	0.216872
TGGCG	0.595141	0.3382
TGGCT	0.321394	0.104345
TGGGA	2.06925	1.22003
TGGGC	0.304763	0.025931
TGGGG	0.175589	0.445932
TGGGT	0.216448	0.325822
TGGTA	0.326621	0.695145
TGGTC	0.0894492	0.939604
TGGTG	0.289033	2.38476
TGGTT	1.6919	0.590872
TGTAA	0.0808285	0.558892
TGTAC	0.940112	0.251564
TGTAG	0.412736	0.252216
TGTAT	0.304542	0.611964
TGTCA	0.0530868	0.217405
TGTCC	1.74775	0.0280296
TGTCG	2.19493	0
TGTCT	1.55479	1.19808
TGTGA	0.137496	0.0246453
TGTGC	2.85747	1.75751
TGTGG	0.536133	2.09913
TGTGT	3.99993	0.0764963
TGTTA	0.273494	0.447203
TGTTC	0.937211	0.0842821
TGTTG	2.10537	0.0774458
TGTTT	2.7351	0.192484
TTAAA	0.294372	0.101566
TTAAC	0.87541	0.452982
TTAAG	0.3255	0.45708
TTAAT	0.260625	0.075202
TTACA	0.24221	0.320429
TTACC	0.136984	0.097814
TTACG	0.1894	0.28188
TTACT	0.140833	1.39909
TTAGA	0.0816994	0.836007
TTAGC	0.643159	0.368415
TTAGG	0.0894798	1.8917
TTAGT	1.12799	0.752598
TTATA	0.301513	0.134826
TTATC	0.613569	0.236326
TTATG	0.445932	0.767139
TTATT	0.0744934	0.101588
TTCAA	0.17473	0.49398
TTCAC	0.221992	0.054245
TTCAG	0	0.0507027
TTCAT	1.74057	0.302449
TTCCA	1.13258	0.0517872
TTCCC	0.635616	1.06869
TTCCG	0.53665	1.15528
TTCCT	1.46924	0.26305
TTCGA	0.820265	0.414183
TTCGC	1.22185	0.160499
TTCGG	0.312248	1.9199
TTCGT	0.0956103	0.793965
TTCTA	0.898927	0.0517473
TTCTC	0.542916	0.502365
TTCTG	0.452296	0.959645
TTCTT	1.35552	0.331974
TTGAA	0.162351	0.419807
TTGAC	1.73481	0
TTGAG	2.45792	0.472252
TTGAT	0.276544	0.0529106
TTGCA	1.26484	1.04909
TTGCC	0.0559699	0.183627
TTGCG	0.0584422	0.295972
TTGCT	1.29774	0.346296
TTGGA	0.182759	0.114666
TTGGC	0.115322	0.297699
TTGGG	0.940485	0.476387
TTGGT	1.42933	0.0794514
TTGTA	0.267168	0.165411
TTGTC	1.13372	0
TTGTG	1.48118	0.16898
TTGTT	2.63584	0.454047
TTTAA	0.192628	0.258993
TTTAC	1.0577	0.775406
TTTAG	0.162084	2.53297
TTTAT	0.413365	0.369543
TTTCA	0.780768	0.101622
TTTCC	0.538551	1.44771
TTTCG	1.11473	0
TTTCT	0.277725	0.422233
TTTGA	0.16069	0.294693
TTTGC	0.20205	1.59998
TTTGG	0.927483	0.0237475
TTTGT	3.64828	0
TTTTA	0.202759	1.04403
TTTTC	0.234987	1.41308
TTTTG	1.51228	0.373908
TTTTT	0.0808285	0.664373
	0.0808285

## Sheet: Enhanced
#Pentamer	-log10(p-value) upstream intron	-log10(p-value) downstream intron
AAAAA	8.19657	8.7834
AAAAC	3.51852	2.31348
AAAAG	5.85015	5.30524
AAAAT	13.8373	11.3586
AAACA	1.63427	3.78482
AAACC	1.28449	0.758117
AAACG	0.229307	0.393299
AAACT	3.50396	4.9276
AAAGA	2.80811	3.5519
AAAGC	1.68263	0.344207
AAAGG	3.87797	0.908251
AAAGT	4.11173	3.23652
AAATA	11.3301	9.54088
AAATC	5.64115	3.33154
AAATG	7.23928	4.98989
AAATT	7.08602	8.12927
AACAA	2.06581	3.47492
AACAC	0.454503	0.0851362
AACAG	1.99192	1.41427
AACAT	3.04275	6.17165
AACCA	3.11252	0.111525
AACCC	0.308366	0.0849911
AACCG	0.0625692	0.239383
AACCT	0.599684	0.903296
AACGA	0.193819	0.791307
AACGC	0.447136	1.23808
AACGG	0.119372	0.63695
AACGT	0.100958	0.264671
AACTA	1.9167	1.57025
AACTC	0.690692	1.70483
AACTG	0.257342	2.01281
AACTT	4.17762	4.00662
AAGAA	4.01487	4.18572
AAGAC	1.90144	0.888709
AAGAG	0.155219	0.0460376
AAGAT	3.29274	2.84352
AAGCA	3.15883	0.556643
AAGCC	0.149024	0.789034
AAGCG	1.56022	0.79124
AAGCT	0.547773	0.827734
AAGGA	0.706366	0.387893
AAGGC	0.112989	0.206529
AAGGG	0.43391	0.789893
AAGGT	4.25431	0.520508
AAGTA	0.888883	4.26958
AAGTC	0.758229	0.180733
AAGTG	0.849261	1.38155
AAGTT	6.29293	1.9071
AATAA	7.23074	5.86297
AATAC	3.92499	5.93397
AATAG	4.01721	4.71165
AATAT	8.79341	8.08609
AATCA	4.58247	3.47492
AATCC	2.02016	1.14751
AATCG	1.14365	0.19941
AATCT	2.99585	5.06388
AATGA	3.20638	2.77014
AATGC	1.57868	0.812941
AATGG	2.20418	0.700036
AATGT	4.99999	6.01186
AATTA	8.5557	8.43988
AATTC	1.44221	4.06648
AATTG	2.79219	2.13743
AATTT	9.96485	9.96121
ACAAA	2.84217	3.14075
ACAAC	0.897487	0.42934
ACAAG	0.417196	0.175481
ACAAT	2.82176	3.50378
ACACA	0.273621	0
ACACC	0.519615	0.305296
ACACG	1.4753	1.11959
ACACT	2.79259	0.289203
ACAGA	2.66847	0.727533
ACAGC	0.522165	0.172654
ACAGG	0.399851	0.316542
ACAGT	3.08207	0.35923
ACATA	3.14407	4.61957
ACATC	0	0.683031
ACATG	1.7549	1.89329
ACATT	9.12874	5.53826
ACCAA	1.59927	0.384596
ACCAC	0.775232	0.89541
ACCAG	0.20162	0.0234504
ACCAT	0.975296	2.27054
ACCCA	2.45248	0
ACCCC	5.15253	1.88293
ACCCG	0.138121	0.352073
ACCCT	0.833264	1.35284
ACCGA	0.0690748	0.224838
ACCGC	0.378366	0.692716
ACCGG	0.705185	1.61281
ACCGT	0.282911	0.0487264
ACCTA	0.37578	0.280823
ACCTC	2.11943	0.327418
ACCTG	0.214662	0.471003
ACCTT	2.49249	0.573238
ACGAA	0.356795	0.122289
ACGAC	0.09445	0.83836
ACGAG	0.380326	0.603424
ACGAT	0.212282	0.632412
ACGCA	1.34734	0.352361
ACGCC	0.19589	0.164428
ACGCG	1.90541	0.993464
ACGCT	0	0.248756
ACGGA	0.0563341	0.234328
ACGGC	2.56051	2.38406
ACGGG	0.0450358	0.15117
ACGGT	0.463797	0.0501136
ACGTA	0.91415	0.950967
ACGTC	0.0652085	0.345834
ACGTG	0.383494	0.0376954
ACGTT	1.04389	0
ACTAA	5.04988	1.7154
ACTAC	0.719361	3.36257
ACTAG	1.58279	0.284082
ACTAT	2.12478	4.00493
ACTCA	0.813139	0.511691
ACTCC	0.292178	0.174546
ACTCG	0.45776	0.1168
ACTCT	2.11424	0
ACTGA	0.287184	0.160625
ACTGC	0.357634	0.256325
ACTGG	0	0.562595
ACTGT	0.457555	1.93825
ACTTA	2.53518	1.87315
ACTTC	3.18555	0.30315
ACTTG	3.29185	0.934497
ACTTT	5.86258	8.56367
AGAAA	4.9624	2.04674
AGAAC	0.36452	1.46002
AGAAG	0.431163	0.492817
AGAAT	3.83658	2.39623
AGACA	0.58164	0.125184
AGACC	0.146359	0
AGACG	0.046248	0.0399454
AGACT	0.587372	1.06933
AGAGA	0.408648	0.642004
AGAGC	0.738301	1.65115
AGAGG	0.0965931	0.344831
AGAGT	1.44941	0.736405
AGATA	2.18733	3.39112
AGATC	0.439504	0.539126
AGATG	2.12794	0.821874
AGATT	10.5448	3.38948
AGCAA	2.76387	0.104041
AGCAC	0.119085	0.6063
AGCAG	0.0228041	2.01546
AGCAT	4.26618	0.823371
AGCCA	0.094725	0.310029
AGCCC	2.72788	5.03714
AGCCG	0.389239	0.356088
AGCCT	0.172444	0.589891
AGCGA	0.0928008	0.147805
AGCGC	1.4753	1.4869
AGCGG	0.806464	3.08898
AGCGT	2.36467	1.08758
AGCTA	3.33701	2.75071
AGCTC	0.35434	0.228864
AGCTG	0.56027	0.0664854
AGCTT	1.1577	0.314026
AGGAA	0.365152	0.939644
AGGAC	0.191441	1.964
AGGAG	0.716763	0.0212834
AGGAT	1.4595	0.0237997
AGGCA	0.0456364	0.204117
AGGCC	1.99682	0.603844
AGGCG	0.257474	0
AGGCT	0.483531	0.91965
AGGGA	1.26645	3.88226
AGGGC	2.43753	8.30564
AGGGG	3.09308	3.7892
AGGGT	1.16735	0.999226
AGGTA	0.626076	1.04017
AGGTC	1.30373	0
AGGTG	0.470964	0.045176
AGGTT	2.78668	1.22275
AGTAA	3.85691	4.77717
AGTAC	1.66904	0.234413
AGTAG	0.934028	4.29512
AGTAT	3.4391	3.07201
AGTCA	1.66608	0.616803
AGTCC	0.573622	0.694195
AGTCG	0.132019	1.74576
AGTCT	0.472661	0.152142
AGTGA	0.509985	1.01955
AGTGC	0.864024	1.63021
AGTGG	1.57101	0.0683135
AGTGT	0.904531	0.869364
AGTTA	7.00797	1.47283
AGTTC	2.60085	1.19376
AGTTG	1.42731	0.621082
AGTTT	2.78267	2.36065
ATAAA	7.73336	9.62679
ATAAC	2.32762	1.84347
ATAAG	4.29794	2.11403
ATAAT	7.53004	6.54945
ATACA	5.05076	3.33302
ATACC	0.893005	2.52902
ATACG	0.114983	0.697469
ATACT	2.743	3.30981
ATAGA	1.18767	2.14488
ATAGC	1.02686	2.12549
ATAGG	1.61391	1.77238
ATAGT	6.14995	3.36234
ATATA	7.57709	6.93734
ATATC	2.23403	1.00324
ATATG	4.09411	5.0773
ATATT	5.72762	10.4038
ATCAA	3.07514	3.18577
ATCAC	1.66105	1.00804
ATCAG	0.590979	0.526689
ATCAT	4.70149	3.19815
ATCCA	0.970114	0.293061
ATCCC	0.645734	0.108574
ATCCG	0.185683	0.518154
ATCCT	0.0484062	1.05684
ATCGA	0.608885	0.0652085
ATCGC	0.394688	0.294103
ATCGG	0	1.50444
ATCGT	1.08871	0.372132
ATCTA	0.975745	2.89847
ATCTC	0.257434	1.16919
ATCTG	1.46481	1.86181
ATCTT	2.59429	3.08502
ATGAA	5.99334	2.08129
ATGAC	0.636474	3.07112
ATGAG	1.29871	0.840076
ATGAT	3.07317	5.09222
ATGCA	0.80172	0.60969
ATGCC	0.355761	0.107449
ATGCG	0.136492	0.794886
ATGCT	1.9738	0.980168
ATGGA	0.511896	0.022951
ATGGC	0.258187	0.278775
ATGGG	0.736048	0.728857
ATGGT	1.46542	0.158702
ATGTA	2.20622	7.07416
ATGTC	2.21682	0.109103
ATGTG	2.52832	0.0945496
ATGTT	5.27262	9.3238
ATTAA	5.06016	8.94602
ATTAC	5.97598	5.72065
ATTAG	2.82011	3.80548
ATTAT	3.73722	8.17909
ATTCA	2.23768	1.86543
ATTCC	0.075554	1.26627
ATTCG	0.523901	0.130139
ATTCT	4.12684	6.68356
ATTGA	8.84803	3.51645
ATTGC	1.54891	0.845857
ATTGG	3.33239	0.0782972
ATTGT	3.75438	4.09174
ATTTA	9.34948	7.89948
ATTTC	2.23706	2.9086
ATTTG	3.67462	2.7146
ATTTT	15.5147	11.0647
CAAAA	2.68862	6.82324
CAAAC	0.530299	0.486481
CAAAG	2.51118	0.668022
CAAAT	2.95061	2.90721
CAACA	2.46149	1.07809
CAACC	0.0312411	0.848175
CAACG	0	0.24546
CAACT	0.0571683	0.125182
CAAGA	1.02106	0.691894
CAAGC	0.0556784	0.026155
CAAGG	0.463909	0.164434
CAAGT	0.0772171	0.136186
CAATA	2.43277	2.2848
CAATC	1.33356	0.10232
CAATG	1.28092	1.0615
CAATT	3.26929	1.63227
CACAA	0.0274564	0.558723
CACAC	0.502554	0.112884
CACAG	1.69512	2.16602
CACAT	1.88306	0.849048
CACCA	0.445622	0.545066
CACCC	6.3001	2.18132
CACCG	0.0422985	0.541325
CACCT	0.667286	0.499538
CACGA	0	1.20635
CACGC	0.495451	0.214809
CACGG	2.15028	0.51991
CACGT	0.507459	0.123626
CACTA	1.33716	1.96952
CACTC	0.393992	0.146417
CACTG	0.680254	0.116893
CACTT	3.43858	5.59011
CAGAA	2.0541	0.91125
CAGAC	0.0549724	1.86149
CAGAG	0.238268	2.80645
CAGAT	4.31855	0.0721139
CAGCA	0	0.38627
CAGCC	1.29581	0.0435449
CAGCG	1.37455	1.25089
CAGCT	0.372081	0.266174
CAGGA	0.504452	0.230477
CAGGC	0.46861	0.232561
CAGGG	5.6693	4.496
CAGGT	0	0.15665
CAGTA	1.17132	0.719822
CAGTC	0.426186	0.173561
CAGTG	0.144671	0.0430732
CAGTT	2.01152	0.77037
CATAA	4.96744	3.82902
CATAC	0.842141	0.512758
CATAG	1.65297	1.53026
CATAT	3.41109	4.7331
CATCA	0.147093	0.172633
CATCC	1.01408	0.218673
CATCG	0.0597139	0.0636881
CATCT	0.0223055	1.46122
CATGA	1.24799	2.03977
CATGC	0.411588	0.134929
CATGG	0.232645	0.158574
CATGT	0.240928	2.01436
CATTA	3.22035	3.72169
CATTC	0.953628	1.43114
CATTG	3.77904	1.95892
CATTT	5.25075	4.68521
CCAAA	0.776036	2.11219
CCAAC	0.0946056	0.0288588
CCAAG	1.72729	0.948144
CCAAT	3.66476	0.172742
CCACA	0.850606	0.0489813
CCACC	1.96042	0.186757
CCACG	1.13343	0.124973
CCACT	0.470964	0.023866
CCAGA	0.654094	2.28864
CCAGC	1.50553	0
CCAGG	2.242	0.893323
CCAGT	0.132527	0.486795
CCATA	0.887845	0.228763
CCATC	1.40765	0.632162
CCATG	1.31638	0.671281
CCATT	0.245722	1.80967
CCCAA	1.45038	0
CCCAC	6.82618	2.15508
CCCAG	3.39941	0.647752
CCCAT	2.00862	0.164185
CCCCA	7.98215	5.6054
CCCCC	7.84444	4.90438
CCCCG	9.20607	2.28357
CCCCT	7.50606	7.51949
CCCGA	2.35614	0.999699
CCCGC	4.03371	4.93102
CCCGG	2.42074	1.3779
CCCGT	1.03051	1.11668
CCCTA	0.410584	1.05906
CCCTC	9.487	5.86402
CCCTG	8.75869	7.69582
CCCTT	1.15059	4.56038
CCGAA	0.0611941	0.755634
CCGAC	2.7375	1.23261
CCGAG	0.0374817	0.0386179
CCGAT	0.0749973	0.438962
CCGCA	2.89678	1.2304
CCGCC	2.73952	2.3525
CCGCG	3.46658	0
CCGCT	1.12679	5.04127
CCGGA	1.86589	1.19313
CCGGC	3.69262	0.0414552
CCGGG	0.835308	1.98497
CCGGT	0.463797	1.15643
CCGTA	0.631206	0.19941
CCGTC	1.34574	0
CCGTG	1.59808	2.05296
CCGTT	1.13892	2.7682
CCTAA	0.78728	0.185995
CCTAC	0.495138	0.325041
CCTAG	0.641644	1.01166
CCTAT	0.125182	1.14046
CCTCA	1.76563	0.0688109
CCTCC	4.57859	1.80927
CCTCG	0.639116	0.176913
CCTCT	5.27753	3.86873
CCTGA	0.0457362	0.540473
CCTGC	4.83484	4.52928
CCTGG	0.65761	2.87374
CCTGT	0.172401	1.17357
CCTTA	1.21934	0.632154
CCTTC	1.10098	0.748246
CCTTG	0.34079	0.0702707
CCTTT	0.221549	0.0894065
CGAAA	2.5364	0.356795
CGAAC	0.366382	0.0623039
CGAAG	2.29572	0.120708
CGAAT	0.280385	0
CGACA	0.801927	0.527
CGACC	0.625489	1.27799
CGACG	0.813638	0.519687
CGACT	1.05004	0
CGAGA	0.0416361	1.14114
CGAGC	1.64104	0.124936
CGAGG	0.563951	0.584081
CGAGT	0.473574	0.319036
CGATA	0.301074	0.661045
CGATC	0.46798	0.537434
CGATG	1.29321	0.879133
CGATT	0.869176	0.114131
CGCAA	0.496207	0
CGCAC	0.751203	0.201358
CGCAG	1.33697	0.46999
CGCAT	0.74084	0.834845
CGCCA	0.0397188	0.0909351
CGCCC	4.31155	1.68008
CGCCG	2.89886	3.63292
CGCCT	0.206378	0.180075
CGCGA	1.13426	0
CGCGC	0.794886	0.0795568
CGCGG	6.10141	1.24625
CGCGT	2.3341	0.374074
CGCTA	0.485555	0.272688
CGCTC	0.571037	0.693005
CGCTG	2.00412	2.18656
CGCTT	0.365437	2.12883
CGGAA	0.389057	0.684903
CGGAC	0.348794	0.323973
CGGAG	0.848871	1.32716
CGGAT	0.065571	0
CGGCA	1.30798	1.24943
CGGCC	1.9382	1.25089
CGGCG	1.0778	1.5231
CGGCT	0.446239	0.0391148
CGGGA	0.354293	1.64696
CGGGC	3.32928	1.15873
CGGGG	2.94738	7.7144
CGGGT	0.819759	0.239753
CGGTA	0.204176	0
CGGTC	0.235874	0.196738
CGGTG	1.76833	1.07042
CGGTT	0.58307	1.36517
CGTAA	1.40861	0.725845
CGTAC	0	0.227668
CGTAG	0.280385	0.316599
CGTAT	2.39703	1.43937
CGTCA	0	0.267725
CGTCC	3.11879	1.08758
CGTCG	1.13075	0
CGTCT	0.236051	0.24063
CGTGA	0.451471	0.0858453
CGTGC	0.588188	0.804674
CGTGG	1.20978	0.400075
CGTGT	0.380194	1.59808
CGTTA	0.175523	0.0545725
CGTTC	0.104122	0.517063
CGTTG	0.0450358	1.4753
CGTTT	0.117812	0.626241
CTAAA	8.65026	1.09322
CTAAC	0.204756	0.985811
CTAAG	0.770005	0.385094
CTAAT	2.98831	5.25783
CTACA	1.47502	3.83631
CTACC	1.32478	0.214858
CTACG	0.524361	0
CTACT	1.95215	3.26178
CTAGA	0.75042	0.330759
CTAGC	0.182228	0.260062
CTAGG	0.195054	0.262326
CTAGT	0.548498	0.274331
CTATA	1.59927	3.7224
CTATC	0.605416	1.43862
CTATG	0.411278	0.190058
CTATT	2.49388	4.07391
CTCAA	1.20073	1.79197
CTCAC	0.0745748	0.0457362
CTCAG	0.0663156	0.0428462
CTCAT	0.249373	0.423247
CTCCA	0.307834	0.247452
CTCCC	8.20526	2.31977
CTCCG	3.24832	0.137379
CTCCT	1.3401	0.168938
CTCGA	0.139959	0.519427
CTCGC	1.26094	0.935743
CTCGG	0.585711	0.209043
CTCGT	0.143762	0.629068
CTCTA	0.274066	2.3963
CTCTC	2.20281	4.68146
CTCTG	1.39894	1.26168
CTCTT	0.702155	0
CTGAA	0.456087	0.307834
CTGAC	1.63031	0.514232
CTGAG	0.0901118	0.818374
CTGAT	1.30517	0.496216
CTGCA	1.53803	0.623765
CTGCC	3.61283	3.08573
CTGCG	3.90589	3.66764
CTGCT	1.34396	1.09558
CTGGA	0.830011	0
CTGGC	1.05901	0.764629
CTGGG	1.1918	2.56704
CTGGT	1.02572	0.154661
CTGTA	0.57895	4.11301
CTGTC	0.12083	0.237316
CTGTG	0.140557	1.65087
CTGTT	2.58868	0.197114
CTTAA	6.30738	3.02693
CTTAC	1.268	1.6033
CTTAG	0.568448	1.13252
CTTAT	3.6328	4.07732
CTTCA	1.69214	0.281829
CTTCC	0.608403	0.946135
CTTCG	0.0477992	1.33272
CTTCT	0.420246	1.12488
CTTGA	5.49006	2.08953
CTTGC	0.805197	0.274874
CTTGG	0.414773	0
CTTGT	1.02026	0.681082
CTTTA	2.79101	7.05614
CTTTC	0.757236	0.401133
CTTTG	0.901998	1.55701
CTTTT	9.14048	6.95231
GAAAA	6.05726	4.66992
GAAAC	0.749657	2.49325
GAAAG	0.640437	0.35105
GAAAT	2.95471	3.95344
GAACA	0.954923	0.80172
GAACC	0.503149	0.169276
GAACG	0.331598	1.7439
GAACT	0.391863	2.03948
GAAGA	0.745267	0.221143
GAAGC	0.482052	1.78841
GAAGG	0.336606	1.11592
GAAGT	0.263226	0.19167
GAATA	2.69065	4.87209
GAATC	1.679	0.610294
GAATG	0.630264	0.836283
GAATT	2.15552	2.80724
GACAA	0.232471	0.196056
GACAC	0.20785	1.02655
GACAG	0.409475	0.326788
GACAT	1.31521	1.50551
GACCA	0.664425	0.586976
GACCC	4.22906	2.46184
GACCG	1.45817	0.625489
GACCT	0.10804	0.839714
GACGA	0	0.652158
GACGC	0.983116	1.86184
GACGG	0.277989	0
GACGT	0	1.03348
GACTA	3.67373	1.56161
GACTC	0.52974	0.79839
GACTG	0.287728	0.756412
GACTT	0.553581	0.102732
GAGAA	1.08657	0.265661
GAGAC	0.101901	0.244968
GAGAG	0.193174	0.938428
GAGAT	1.60653	0.768783
GAGCA	0.197787	0.82711
GAGCC	0.931245	1.9248
GAGCG	1.21242	0.510339
GAGCT	0.075948	0.401216
GAGGA	1.02953	0.0472156
GAGGC	0.0484062	0.741083
GAGGG	2.76764	7.3093
GAGGT	0.192495	0.533332
GAGTA	4.45146	1.97422
GAGTC	0.121409	1.32002
GAGTG	1.31845	0.35109
GAGTT	3.01031	1.61089
GATAA	2.20232	1.04656
GATAC	0.772879	1.11524
GATAG	1.83687	0.683528
GATAT	2.11579	2.39844
GATCA	3.03518	2.79635
GATCC	0.572612	0.127375
GATCG	0.495339	0.376449
GATCT	0.869286	1.98431
GATGA	1.04625	0
GATGC	1.06546	0.0286491
GATGG	0.520172	0.946645
GATGT	1.90871	0.167651
GATTA	3.63035	3.64648
GATTC	1.78815	2.30881
GATTG	4.73784	0.422879
GATTT	5.40954	2.22405
GCAAA	2.33972	0.0246
GCAAC	0.915016	0.093947
GCAAG	0.0271061	0.296414
GCAAT	2.0301	1.20382
GCACA	0.293077	0.356887
GCACC	0.611891	1.87669
GCACG	0.0506087	0
GCACT	0.242301	2.63685
GCAGA	0.501269	0.480903
GCAGC	0.877857	3.69688
GCAGG	1.18521	2.12141
GCAGT	0.328174	0.28089
GCATA	3.68941	1.21002
GCATC	0.630286	0
GCATG	0.383152	0.222992
GCATT	5.28326	2.93509
GCCAA	0.306	0.254162
GCCAC	0.403909	0.517609
GCCAG	0.312869	1.79173
GCCAT	0.23946	1.47093
GCCCA	3.46322	0.125209
GCCCC	10.1176	9.57403
GCCCG	2.19514	2.13699
GCCCT	3.98535	9.06194
GCCGA	0.0486704	0.667257
GCCGC	1.58496	0.816567
GCCGG	3.587	0.124285
GCCGT	2.36718	2.44586
GCCTA	0.39523	0.399424
GCCTC	5.06587	0.179177
GCCTG	0	1.20198
GCCTT	0.250075	0.100491
GCGAA	0.428753	0.622036
GCGAC	0.309884	0.928349
GCGAG	0.214471	1.24943
GCGAT	0.172421	0.105859
GCGCA	0.189682	0.107468
GCGCC	1.96312	0.0400862
GCGCG	3.56838	1.12844
GCGCT	0.9236	1.23424
GCGGA	0.310224	0.858848
GCGGC	1.7439	4.88616
GCGGG	6.17343	4.932
GCGGT	1.34451	0.858848
GCGTA	0.076637	0.147218
GCGTC	2.05684	0.207861
GCGTG	0.259028	0.0710657
GCGTT	0.381948	0.908361
GCTAA	4.69252	3.37568
GCTAC	0.41317	3.084
GCTAG	0.349907	0.710207
GCTAT	1.16466	1.55318
GCTCA	0.228601	1.2146
GCTCC	4.85626	1.70567
GCTCG	0.412071	1.7439
GCTCT	0.907779	1.75145
GCTGA	0.314275	0.154816
GCTGC	1.3691	3.55565
GCTGG	1.74143	1.75345
GCTGT	0.432472	0.850801
GCTTA	1.51773	2.15432
GCTTC	0.482139	0.95568
GCTTG	0.104041	0.0755363
GCTTT	3.39222	1.3122
GGAAA	0.371061	1.47772
GGAAC	0.28399	0.0908494
GGAAG	0.807495	3.11693
GGAAT	1.44125	0.453979
GGACA	0.52357	1.22089
GGACC	0.685542	3.74916
GGACG	1.32326	0.898648
GGACT	0.0262997	0.937731
GGAGA	0.551098	1.55787
GGAGC	3.06655	0.937731
GGAGG	1.98093	2.12082
GGAGT	0.37573	0.343963
GGATA	2.01761	0.519615
GGATC	0.0991032	0.0942587
GGATG	0.566157	2.44327
GGATT	1.12606	1.53726
GGCAA	0.147093	0.706091
GGCAC	0.190044	0.404261
GGCAG	1.79485	2.09486
GGCAT	0.237046	0.26082
GGCCA	0.418968	0.0995686
GGCCC	7.70286	8.00743
GGCCG	3.95426	0.997446
GGCCT	2.52929	0.495444
GGCGA	0.757537	1.89943
GGCGC	0.880356	0.186272
GGCGG	3.04422	3.15684
GGCGT	0.540575	0.342958
GGCTA	0.0582831	4.28835
GGCTC	1.37092	0.213874
GGCTG	1.07713	1.11571
GGCTT	0.684717	0.560703
GGGAA	0.390978	1.86549
GGGAC	2.64433	1.5988
GGGAG	3.5716	2.57767
GGGAT	0.0749107	0.844712
GGGCA	1.50843	3.76619
GGGCC	8.89566	6.37358
GGGCG	0.524892	3.08022
GGGCT	3.54473	3.70838
GGGGA	4.48448	5.89503
GGGGC	2.98622	7.67559
GGGGG	3.31534	8.83519
GGGGT	3.07006	3.04037
GGGTA	0.211259	0.587069
GGGTC	4.32803	1.26708
GGGTG	1.52361	5.73422
GGGTT	0.910201	0.0233709
GGTAA	0.627955	0.163387
GGTAC	0.115089	0.034453
GGTAG	0.229236	0.224971
GGTAT	3.50005	0.647167
GGTCA	0.116462	0.500337
GGTCC	4.47306	3.07691
GGTCG	0.140245	1.11989
GGTCT	0.103624	1.85619
GGTGA	0.298657	1.40459
GGTGC	2.07916	0.952351
GGTGG	1.51572	4.62311
GGTGT	0.707333	0.10294
GGTTA	5.27417	0
GGTTC	0.400421	0.756412
GGTTG	0.443825	0.0250821
GGTTT	0.174417	0.659653
GTAAA	2.66511	5.78717
GTAAC	1.14405	2.01186
GTAAG	0.247108	4.29037
GTAAT	1.32629	6.53452
GTACA	1.19718	0.25639
GTACC	0	0.0635865
GTACG	0.511681	0.433467
GTACT	1.30798	0.726066
GTAGA	1.37393	3.39631
GTAGC	0.115653	2.15432
GTAGG	1.35311	0.284802
GTAGT	2.416	2.79387
GTATA	1.91827	5.72076
GTATC	1.26379	0.950503
GTATG	1.99333	0.819743
GTATT	5.35927	4.2552
GTCAA	1.20382	0.985291
GTCAC	0.185912	0.191512
GTCAG	1.4589	0.451724
GTCAT	1.27325	2.26677
GTCCA	1.05906	0.535304
GTCCC	3.51796	5.43224
GTCCG	0	2.41133
GTCCT	1.77223	2.58107
GTCGA	0	0.176183
GTCGC	0	0.433467
GTCGG	0.485663	3.34171
GTCGT	0.0597139	0
GTCTA	0.712075	0
GTCTC	0.303458	1.12606
GTCTG	0.102088	1.68212
GTCTT	2.50031	1.38721
GTGAA	1.58476	0.124797
GTGAC	0.143525	0.843704
GTGAG	0.682105	0.74591
GTGAT	1.53844	1.45795
GTGCA	0.733316	0.0722987
GTGCC	0.532757	1.75339
GTGCG	2.01948	1.0768
GTGCT	0.394566	0.56002
GTGGA	0.279325	0.307194
GTGGC	1.10971	0.021952
GTGGG	4.93028	4.98455
GTGGT	0.161988	1.49761
GTGTA	2.44804	0.845857
GTGTC	0.323928	1.38758
GTGTG	0.49538	0.915583
GTGTT	2.72172	1.04809
GTTAA	7.29764	2.83661
GTTAC	3.8061	0.521823
GTTAG	1.51728	0.631283
GTTAT	4.60964	1.5812
GTTCA	2.9942	2.05873
GTTCC	0	0.298831
GTTCG	0	0.181058
GTTCT	2.34565	0.0467966
GTTGA	1.55862	2.18451
GTTGC	1.47093	0.69583
GTTGG	0.0751778	0.58049
GTTGT	1.26275	1.81976
GTTTA	5.49006	2.26324
GTTTC	0.172663	0.655654
GTTTG	0.831626	0.0947883
GTTTT	7.76838	4.01537
TAAAA	13.2406	12.6507
TAAAC	1.21083	6.59358
TAAAG	3.7372	1.11651
TAAAT	9.0449	6.96062
TAACA	2.10627	2.95216
TAACC	2.79411	0.163235
TAACG	0.270153	0.36161
TAACT	5.64105	1.70137
TAAGA	4.88842	3.18182
TAAGC	1.07438	0.738222
TAAGG	0.806969	1.65302
TAAGT	1.29189	3.79873
TAATA	8.6004	7.03804
TAATC	1.95095	5.34265
TAATG	4.17451	4.45622
TAATT	6.71974	12.2772
TACAA	2.25148	3.02672
TACAC	0.22451	0.0293401
TACAG	2.1219	2.74168
TACAT	5.09769	4.43109
TACCA	0.0266736	0.857931
TACCC	1.81881	0.295286
TACCG	0.137632	0.256203
TACCT	1.49806	1.75671
TACGA	0	0.153743
TACGC	0	1.41718
TACGG	0	0.524361
TACGT	0.53355	0
TACTA	3.84477	3.53743
TACTC	3.32267	0.356318
TACTG	0.10309	1.55948
TACTT	7.14041	3.77289
TAGAA	1.44939	1.31108
TAGAC	0.298066	0.0302869
TAGAG	1.63144	3.14888
TAGAT	3.56608	4.02258
TAGCA	0.536259	1.45002
TAGCC	0.367152	1.96857
TAGCG	0.202529	0.137632
TAGCT	2.8213	5.21163
TAGGA	2.46012	1.57023
TAGGC	0.683031	1.55354
TAGGG	0.188353	0.983105
TAGGT	0.518077	1.94916
TAGTA	4.29151	5.85615
TAGTC	1.84192	1.55162
TAGTG	1.90184	1.06449
TAGTT	3.53607	2.93691
TATAA	6.08661	9.36858
TATAC	3.50406	1.77238
TATAG	2.4509	4.65605
TATAT	5.04387	9.92604
TATCA	3.87105	2.08225
TATCC	0.527138	0.647318
TATCG	0.740742	0.163689
TATCT	1.273	2.69729
TATGA	4.73833	3.62091
TATGC	3.33329	0.694769
TATGG	0.4263	0.403576
TATGT	4.05901	7.40885
TATTA	4.92388	6.53452
TATTC	3.04403	1.90923
TATTG	5.03678	4.29371
TATTT	12.3341	15.8059
TCAAA	6.30525	3.78525
TCAAC	0.0312127	0
TCAAG	1.24914	4.3798
TCAAT	1.18924	0.823723
TCACA	0.529631	1.23617
TCACC	0.1369	0.196784
TCACG	0.624522	0.464874
TCACT	1.9485	2.81958
TCAGA	1.81824	0.240385
TCAGC	0.511043	0.438055
TCAGG	1.42943	0.174804
TCAGT	1.91787	1.69217
TCATA	4.61001	6.51851
TCATC	0.682181	0.168996
TCATG	2.49744	0.516151
TCATT	4.21516	2.58671
TCCAA	1.2629	0.493816
TCCAC	0.0825638	0.110881
TCCAG	0.520693	0.341672
TCCAT	0.0988688	0.0762076
TCCCA	0.392596	0.847988
TCCCC	9.0966	5.89143
TCCCG	0.570997	2.39936
TCCCT	6.42857	3.06125
TCCGA	0.389057	0.0645747
TCCGC	2.1634	0.907306
TCCGG	0.109805	0.793727
TCCGT	0	1.00899
TCCTA	1.1083	0.237032
TCCTC	4.22769	0.593126
TCCTG	0.138855	0.577782
TCCTT	0.66055	0.622594
TCGAA	0	0.492666
TCGAC	0.163689	0.987307
TCGAG	0.237664	0.51821
TCGAT	0.309884	0
TCGCA	0.193819	0.0652085
TCGCC	0.304364	0.684583
TCGCG	0.481678	0.256113
TCGCT	0.0928008	0.203267
TCGGA	0.447136	0.47771
TCGGC	0.76978	0
TCGGG	0.918051	1.75062
TCGGT	0.44403	1.32326
TCGTA	0.968987	0.659867
TCGTC	0.193819	0.207861
TCGTG	0.765036	0.674124
TCGTT	0.138591	0.295455
TCTAA	1.73626	1.71272
TCTAC	1.4757	3.39427
TCTAG	0.599506	1.68094
TCTAT	2.45844	2.18323
TCTCA	3.14459	0.227829
TCTCC	2.14603	0.534779
TCTCG	0.400529	0
TCTCT	0.163484	0.530373
TCTGA	0.406374	0.204566
TCTGC	0.528117	1.57637
TCTGG	0.539925	0.0451475
TCTGT	1.12924	0.190055
TCTTA	6.58314	4.30757
TCTTC	0.553167	0.745458
TCTTG	0.594278	1.09031
TCTTT	6.35369	6.63975
TGAAA	5.06056	3.10732
TGAAC	3.26453	0.682181
TGAAG	1.84877	1.22923
TGAAT	1.84806	4.91411
TGACA	1.12117	1.03884
TGACC	1.14665	0.0251314
TGACG	0.110975	0
TGACT	0.871981	0.613024
TGAGA	6.91956	1.05132
TGAGC	0.204104	0.124285
TGAGG	0.118618	2.26925
TGAGT	0.712734	0.36103
TGATA	3.19815	2.98659
TGATC	1.26627	3.94771
TGATG	1.95892	0.663641
TGATT	6.55779	2.54458
TGCAA	3.79694	1.53803
TGCAC	1.02482	0.112689
TGCAG	0.043064	0.291579
TGCAT	1.42737	1.34885
TGCCA	0.584873	0.248981
TGCCC	7.03792	1.44161
TGCCG	1.02518	0.293182
TGCCT	0	0.286796
TGCGA	0.128482	1.29321
TGCGC	2.52033	0.840669
TGCGG	2.32929	2.402
TGCGT	0.152114	0.737026
TGCTA	0.369254	0.920604
TGCTC	1.71894	1.49471
TGCTG	0.065804	1.71042
TGCTT	2.15987	1.66734
TGGAA	0.9734	0.0215954
TGGAC	0.093561	2.00301
TGGAG	0.710713	0
TGGAT	0.749052	0.159912
TGGCA	0.28089	0.586742
TGGCC	1.1512	2.33859
TGGCG	0.490464	0.0797702
TGGCT	0.176213	1.28751
TGGGA	0.415807	0.0420075
TGGGC	2.97866	2.63206
TGGGG	4.36903	6.83659
TGGGT	0.636412	1.37626
TGGTA	1.80735	0.271214
TGGTC	0.941159	0.197787
TGGTG	0.505773	0.69596
TGGTT	2.12017	0.12049
TGTAA	1.27364	12.4832
TGTAC	1.58432	0.787672
TGTAG	0.930301	2.30651
TGTAT	3.78995	9.36272
TGTCA	0.999985	1.48628
TGTCC	0.768705	3.27161
TGTCG	0.823771	0
TGTCT	1.49811	0.393799
TGTGA	0.988346	0.327333
TGTGC	0.567713	1.2691
TGTGG	0	1.73059
TGTGT	2.08164	0.0208544
TGTTA	5.52195	5.83744
TGTTC	1.7066	0.357895
TGTTG	2.56494	1.85861
TGTTT	9.58575	2.30813
TTAAA	12.0862	10.3279
TTAAC	5.97598	0.342346
TTAAG	5.95302	3.6172
TTAAT	6.68587	8.1347
TTACA	2.36566	3.97267
TTACC	1.2556	1.30274
TTACG	2.12996	0.828703
TTACT	6.66881	3.06189
TTAGA	2.46179	2.55794
TTAGC	0.851499	3.70811
TTAGG	1.26627	3.61527
TTAGT	3.87017	5.32603
TTATA	7.80809	9.49394
TTATC	2.54916	1.49894
TTATG	5.77221	3.29274
TTATT	10.988	9.03869
TTCAA	1.91372	2.57237
TTCAC	1.44957	1.78985
TTCAG	2.74754	1.15383
TTCAT	8.54907	1.23041
TTCCA	1.73148	0.205146
TTCCC	3.65816	2.26201
TTCCG	0.159893	1.04155
TTCCT	1.24203	0.571767
TTCGA	0.915783	0.537434
TTCGC	0	0.136842
TTCGG	0.119427	0.0556298
TTCGT	1.50653	0.210764
TTCTA	2.93867	2.53682
TTCTC	0.191083	1.3227
TTCTG	0.732536	0.649784
TTCTT	8.73881	7.4654
TTGAA	6.09777	5.79664
TTGAC	2.57792	1.10413
TTGAG	7.40976	2.46687
TTGAT	6.34746	3.43858
TTGCA	0.722254	1.80903
TTGCC	0.539225	0.218512
TTGCG	0.0497478	0.114739
TTGCT	1.16888	0.50774
TTGGA	1.96972	0.0227178
TTGGC	1.78985	0.155157
TTGGG	0.147755	1.01564
TTGGT	1.57718	2.09755
TTGTA	4.91607	11.0558
TTGTC	3.01074	0.587238
TTGTG	0.326782	0.735217
TTGTT	6.28039	2.66758
TTTAA	12.8425	6.76495
TTTAC	2.51071	1.53073
TTTAG	7.05217	9.69743
TTTAT	15.4871	9.8
TTTCA	5.3655	3.84614
TTTCC	1.29344	0.25418
TTTCG	3.62477	0.216775
TTTCT	4.80255	5.0179
TTTGA	8.57013	3.08991
TTTGC	1.15383	0.799952
TTTGG	2.06021	0.345252
TTTGT	6.53155	5.1219
TTTTA	13.0915	15.6005
TTTTC	9.69587	4.24837
TTTTG	8.60814	9.87588
TTTTT	17.1192	12.3959
