# Supplementary material for: Ancient antagonism between CELF and RBFOX families tunes mRNA splicing outcomes
Source: HighWire-hosted journal article supplement (doi:10.1101/gr.220517.117), 2017-05-16
Supplement: Supplemental_Table_S3.xlsx [file Supplemental_Table_S3.xlsx]

## Sheet: LEGEND
Supplementary Table S3: Physiological and disease-relevant local splicing variations (LSVs) antagonized by CELF/RBFOX in mouse muscle contexts

## Sheet: Summary
Summary of all LSVs (local splicing variations) with evidence of CELF/RBFOX antagonism from RNA-seq data. For LSVs with |E(dPSI)| > 10%, the most changing junction had to be changing in the SAME direction in a CELF over expression experiment (CELF1 OE in heart or muscle; CELF2 OE in heart) and an Rbfox2 depletion experiment (Rbfox2 KD in C2C12 myoblasts or myotubes). These antagonistically regula…
Class	Discription					LSVs	Genes
1A	CELF/RBFOX antagonistic changes consistent with all 3 (heart dev., myogenesis, and T1D heart)					53	38
1B	CELF/RBFOX antagonistic changes consistent with 2 (heart dev., myogenesis, and/or T1D heart)					98	72
1C	CELF/RBFOX antagonistic changes consistent with 1 (heart dev., myogenesis, or T1D heart)					75	63
2	CELF/RBFOX antagonistic changes consistent with 1, but inconsistent with another					35	23
3	CELF/RBFOX antagonistic changes opposite of expected direction					31	22
4	CELF/RBFOX antagonistically coregulated, but not changing in any disease/development condition					48	38
Total	All unique LSVs/Genes with CELF/RBFOX coregulation					340	207
Columns	Discription
LSV_ID	LSV ID of antagonistic event
GeneName	Name of gene with antagonistic event
GeneID	Ensembl gene ID with antagonistic event
Class	Color coded class based on change in dev/dis (see above disriptions)
DominantJunction_Coord	coordinates (mm10) of the most changing junction in the LSV that is antagonistically regualted by CELF / RBFOX
CELFvFOX_direction	direction of change upon CELF OE and RBFOX2 KD of the dominant junction. "1" means increased junction use and "-1" means decreased junction use
HeartDev_direction	direction of change during postnatal heart development. "1" means increased junction use; "-1" means decreased junction use; "0" means junction was not detected or not changing with |E(dPSI)| >= 10%
T1D_direction	direction of change in T1D hearts comapred to control. "1" means increased junction use; "-1" means decreased junction use; "0" means junction was not detected or not changing with |E(dPSI)| >= 10%
myogenesis_direction	direction of change during myogenesis development. "1" means increased junction use; "-1" means decreased junction use; "0" means junction was not detected or not changing with |E(dPSI)| >= 10%
Terms	";" seperated list of select GO, KEGG, etc. terms assocated with that gene
Categories	";" seperated list of soucres for list of terms
E(dPSI) values for given junction	E(dPSI) value for dominant junction for each RNA-seq comparison. "NaN" indicates that LSV was not reliable/quantifable in that comparison

## Sheet: CELFRBFOXantagonistic_LSVs
						Dis/Dev splicing change direction					E(dPSI) for given junction
#LSV_ID	GeneName	GeneID	Class	DominantJunc_Coord	CELFvFOX_direction	HeartDev_direction	T1D_direction	myogenesis_direction	Terms	Categories	Celf2_heartOE_WinnerJunc_dPSI	Celf1_heartOE_WinnerJunc_dPSI	Celf1_muscleOE_WinnerJunc_dPSI	Rbfox2_myotubeKD_WinnerJunc_dPSI	Rbfox2_myoblastKD_WinnerJunc_dPSI	heartDev_WinnerJunc_dPSI	T1D_heart_WinnerJunc_dPSI	C2C12diff_WinnerJunc_dPSI
ENSMUSG00000028127:121791734-121791822:target	Abcd3	ENSMUSG00000028127	1A	121788049-121791734	-1	1	-1	1			-0.788635	-0.393285	-0.359029	-0.228508	-3.73723e-11	0.698067	-0.257086	0.222381
ENSMUSG00000032826:126928665-126928847:target	Ank2	ENSMUSG00000032826	1A	126926894-126928665	-1	1	-1	1	GO:0086036~regulation of cardiac muscle cell membrane potential	GOTERM_BP_DIRECT	-0.350314	NaN	NaN	-0.108009	-0.000678021	0.374579	-0.428574	0.37062
ENSMUSG00000028207:9633116-9635969:target	Asph	ENSMUSG00000028207	1A	9624401-9635901	-1	1	-1	1			-0.348014	-0.254617	-0.195803	-0.268731	-6.0389e-15	0.742107	-0.308135	0.490288
ENSMUSG00000033392:113892397-113892475:source	Clasp2	ENSMUSG00000033392	1A	113892475-113892607	-1	1	-1	1			-0.106038	NaN	NaN	-0.277029	-1.65481e-06	0.333075	-0.402665	0.279323
ENSMUSG00000049550:123638956-123638988:target	Clip1	ENSMUSG00000049550	1A	123631169-123638956	-1	1	-1	1			-0.396881	-0.0131501	-0.267992	-0.410772	NaN	0.343192	-0.177577	0.210017
ENSMUSG00000018661:113661659-113661693:source	Cog1	ENSMUSG00000018661	1A	113661693-113662207	-1	1	-1	1			-0.128529	NaN	-0.00356546	-6.47457e-05	-0.110289	0.362645	-0.198145	0.145545
ENSMUSG00000024937:5720809-5720877:source	Ehbp1l1	ENSMUSG00000024937	1A	5720877-5720972	-1	1	-1	1			-0.235545	-0.484437	-0.223703	-0.177474	-1.96253e-11	0.382915	-0.123583	0.36038
ENSMUSG00000058070:108502390-108502418:source	Eml1	ENSMUSG00000058070	1A	108502418-108503183	-1	1	-1	1			-0.176609	NaN	NaN	-0.255553	-3.24129e-07	0.167472	-0.338863	0.250622
ENSMUSG00000006276:72358313-72358445:target	Eps15l1	ENSMUSG00000006276	1A	72356211-72358313	-1	1	-1	1	Coated pit	UP_KEYWORDS	-0.487099	NaN	NaN	-0.336631	-0.0056696	0.490983	-0.349095	0.388478
ENSMUSG00000006276:72345725-72346171:source	Eps15l1	ENSMUSG00000006276	1A	72346171-72356164	-1	1	-1	1	Coated pit	UP_KEYWORDS	-0.421127	NaN	NaN	-0.231721	-7.71491e-07	0.785627	-0.327269	0.266856
ENSMUSG00000015937:56096124-56096234:target	H2afy	ENSMUSG00000015937	1A	56088342-56096124	-1	1	-1	1			-0.00513729	NaN	-0.31801	-0.26499	-0.188259	0.363072	-0.172323	0.491253
ENSMUSG00000035247:51754215-51754422:source	Hectd1	ENSMUSG00000035247	1A	51754422-51757047	-1	1	-1	1			-0.142067	NaN	-0.111747	-0.256231	-0.000663263	0.219966	-0.201997	0.229379
ENSMUSG00000032497:111161303-111161389:source	Lrrfip2	ENSMUSG00000032497	1A	111161389-111162848	-1	1	-1	1			-0.129163	-0.0325196	NaN	-0.276335	7.31888e-16	0.192963	-0.397622	0.36983
ENSMUSG00000030557:67240314-67240440:source	Mef2a	ENSMUSG00000030557	1A	67240440-67244521	-1	1	-1	1			-0.329853	-0.0347846	NaN	-0.455839	-0.0519756	0.323823	-0.228002	0.592568
ENSMUSG00000030557:67251657-67251844:target	Mef2a	ENSMUSG00000030557	1A	67244544-67251657	-1	1	-1	1			-0.173051	-0.349572	-0.0792975	-0.453871	-0.0773401	0.332157	-0.172898	0.583883
ENSMUSG00000001419:88156322-88156525:source	Mef2d	ENSMUSG00000001419	1A	88156525-88158221	-1	1	-1	1			-0.380855	-0.319981	-0.358943	-0.362024	-0.034416	0.405928	-0.388874	0.433254
ENSMUSG00000001419:88161191-88161381:source	Mef2d	ENSMUSG00000001419	1A	88161381-88161781	-1	1	-1	1			0.0589331	-0.378889	-0.00413076	-0.501203	-0.138477	0.642444	-0.31361	0.583451
ENSMUSG00000001419:88159122-88159332:target	Mef2d	ENSMUSG00000001419	1A	88158355-88159122	-1	1	-1	1			-0.244285	-0.033736	-0.507656	-0.336708	-0.00175029	0.602276	-0.14539	0.41408
ENSMUSG00000003178:121021183-121021356:target	Mical3	ENSMUSG00000003178	1A	121019779-121021183	-1	1	-1	1			-0.330247	NaN	NaN	-0.218467	-0.0028171	0.280806	-0.172862	0.159891
ENSMUSG00000049134:56389806-56390037:target	Nrap	ENSMUSG00000049134	1A	56389484-56389806	-1	1	-1	1	GO:0051371~muscle alpha-actinin binding	GOTERM_MF_DIRECT	-0.408089	-0.537215	-0.673802	-0.338704	-0.00722958	0.416367	-0.135811	0.465793
ENSMUSG00000048537:44699347-44699449:target	Phldb1	ENSMUSG00000048537	1A	44698871-44699347	-1	1	-1	1			-0.280497	-0.528411	NaN	-0.2856	-0.143736	0.584724	-0.182725	0.212005
ENSMUSG00000032294:59678044-59678229:target	Pkm	ENSMUSG00000032294	1A	59675195-59678044	-1	1	-1	1			0.000487377	-0.152849	-0.0031173	-0.141166	-0.0317437	0.18452	-0.203476	0.402665
ENSMUSG00000062078:10217716-10217803:target	Qk	ENSMUSG00000062078	1A	10216435-10217716	-1	1	-1	1	GO:0010667~negative regulation of cardiac muscle cell apoptotic process	GOTERM_BP_DIRECT	0.0155493	-0.00489927	-0.198886	-0.211656	-0.00014488	0.207109	-0.351817	0.274531
ENSMUSG00000025006:40398542-40398610:target	Sorbs1	ENSMUSG00000025006	1A	40395768-40398542	-1	1	-1	1			-0.32926	NaN	NaN	-0.171758	-0.113909	0.686673	-0.14261	0.400298
ENSMUSG00000062373:58797201-58797245:source	Tmem65	ENSMUSG00000062373	1A	58797245-58807078	-1	1	-1	1			-0.0838142	-0.250575	-0.271722	-0.110055	-0.0128172	0.318437	-0.133239	0.129206
ENSMUSG00000062373:58822843-58823530:target	Tmem65	ENSMUSG00000062373	1A	58807158-58822843	-1	1	-1	1			-0.0648517	-0.231746	-0.156397	-0.123685	-0.00629744	0.397895	-0.128653	0.166861
ENSMUSG00000028960:149372828-149372969:source	Ube4b	ENSMUSG00000028960	1A	149372969-149379272	-1	1	-1	1			-0.599544	NaN	NaN	-0.130449	-6.27648e-14	0.323684	-0.23266	0.149152
ENSMUSG00000044308:69971060-69971233:source	Ubr3	ENSMUSG00000044308	1A	69971233-69971402	-1	1	-1	1			-0.436927	-0.0287441	-0.433621	-0.182461	-4.59734e-11	0.513337	-0.213982	0.619358
ENSMUSG00000028127:121784473-121784570:source	Abcd3	ENSMUSG00000028127	1A	121784570-121786002	1	-1	1	-1			0.430333	NaN	NaN	0.158542	1.0791e-06	-0.588591	0.187386	-0.157139
ENSMUSG00000025035:46531109-46531386:source	Arl3	ENSMUSG00000025035	1A	46531386-46542352	1	-1	1	-1			0.468431	0.557462	0.433387	0.118013	7.78095e-16	-0.457302	0.232041	-0.182283
ENSMUSG00000026289:87774145-87774231:source	Atg16l1	ENSMUSG00000026289	1A	87774231-87775757	1	-1	1	-1			0.216888	NaN	NaN	0.193676	0.0855656	-0.114417	0.182025	-0.349419
ENSMUSG00000024392:35142307-35142384:source	Bag6	ENSMUSG00000024392	1A	35142384-35142498	1	-1	1	-1			0.132468	0.733623	0.0103521	0.110343	0.125696	-0.292967	0.215689	-0.152206
ENSMUSG00000024392:35142727-35142839:target	Bag6	ENSMUSG00000024392	1A	35142605-35142727	1	-1	1	-1			0.203945	0.652524	0.0694378	0.0653193	0.108337	-0.200915	0.220878	-0.155553
ENSMUSG00000024937:5721442-5721584:target	Ehbp1l1	ENSMUSG00000024937	1A	5720877-5721442	1	-1	1	-1			0.191756	0.098263	0.101322	0.183527	1.15509e-13	-0.368652	0.153916	-0.411121
ENSMUSG00000058070:108506479-108508538:target	Eml1	ENSMUSG00000058070	1A	108502418-108506479	1	-1	1	-1			0.117404	NaN	NaN	0.499405	0.102042	-0.262041	0.5824	-0.420166
ENSMUSG00000027680:34068900-34069342:target	Fxr1	ENSMUSG00000027680	1A	34064319-34068917	1	-1	1	-1			0.0692002	-0.00372579	0.325617	0.17633	0.069182	-0.295498	0.115001	-0.38651
ENSMUSG00000015937:56084196-56084521:source	H2afy	ENSMUSG00000015937	1A	56084285-56089758	1	-1	1	-1			0.00387973	NaN	0.350496	0.262753	0.261116	-0.362072	0.24073	-0.550349
ENSMUSG00000035247:51757047-51757101:target	Hectd1	ENSMUSG00000035247	1A	51755103-51757047	1	-1	1	-1			0.023483	NaN	0.186239	0.236143	0.000136803	-0.260277	0.22289	-0.212607
ENSMUSG00000032479:110036742-110036855:source	Map4	ENSMUSG00000032479	1A	110036855-110063017	1	-1	1	-1			0.120953	0.0262981	0.575763	0.378212	7.77186e-16	-0.437041	0.119547	-0.377483
ENSMUSG00000001419:88162958-88163087:target	Mef2d	ENSMUSG00000001419	1A	88161381-88162958	1	-1	1	-1			-0.0706817	0.506912	NaN	0.505118	0.160024	-0.608541	0.314485	-0.584642
ENSMUSG00000028402:81329427-81329531:source	Mpdz	ENSMUSG00000028402	1A	81329531-81335676	1	-1	1	-1			0.00323478	0.0737963	0.161619	0.200609	0.000232544	-0.438974	0.164519	-0.178007
ENSMUSG00000034354:4480868-4482939:source	Mtmr3	ENSMUSG00000034354	1A	4482939-4485363	1	-1	1	-1			0.221319	NaN	NaN	0.271423	0.0919403	-0.391709	0.22283	-0.211192
ENSMUSG00000059586:59455313-59455466:source	Nsmce2	ENSMUSG00000059586	1A	59455466-59591697	1	-1	1	-1			0.618474	NaN	NaN	0.121945	0.000623616	-0.139716	0.245113	-0.168563
ENSMUSG00000034055:102559565-102559734:target	Phka1	ENSMUSG00000034055	1A	102557272-102559565	1	-1	1	-1	mmu04020:Calcium signaling pathway	KEGG_PATHWAY	0.305503	NaN	0.00744672	0.320325	1.68835e-05	-0.357729	0.316093	-0.442287
ENSMUSG00000048537:44697926-44698220:source	Phldb1	ENSMUSG00000048537	1A	44698220-44699347	1	-1	1	-1			0.209036	0.0103093	NaN	0.302922	0.138988	-0.422082	0.229667	-0.239301
ENSMUSG00000039987:20807404-20807473:source	Phtf2	ENSMUSG00000039987	1A	20807473-20813240	1	-1	1	-1			0.11066	NaN	NaN	0.216299	6.24673e-07	-0.490172	0.242591	-0.215008
ENSMUSG00000019907:108249435-108249650:target	Ppp1r12a	ENSMUSG00000019907	1A	108243130-108249435	1	-1	1	-1			0.368562	NaN	NaN	0.119808	2.17397e-15	-0.330686	0.224763	-0.458911
ENSMUSG00000061306:120109431-120109536:target	Slc38a10	ENSMUSG00000061306	1A	120106610-120109432	1	-1	1	-1			0.334759	NaN	0.211063	0.132504	-0.000602436	-0.215959	0.19299	-0.17674
ENSMUSG00000025006:40393102-40393516:source	Sorbs1	ENSMUSG00000025006	1A	40393516-40398542	1	-1	1	-1			0.304834	NaN	NaN	0.162751	0.000113417	-0.768689	0.147027	-0.432224
ENSMUSG00000030852:130734949-130735243:source	Tacc2	ENSMUSG00000030852	1A	130735150-130739812	1	-1	1	-1			-0.00207737	0.162773	0.00187782	0.320087	0.149509	-0.66701	0.180605	-0.235894
ENSMUSG00000028899:132282792-132283045:target	Taf12	ENSMUSG00000028899	1A	132274487-132282794	1	-1	1	-1			0.438473	NaN	NaN	0.339175	-9.13703e-05	-0.518769	0.199764	-0.404544
ENSMUSG00000033530:100347936-100348033:target	Ttc7b	ENSMUSG00000033530	1A	100332719-100347936	1	-1	1	-1			0.000570591	0.100718	NaN	0.354169	0.00181206	-0.242288	0.302529	-0.598922
ENSMUSG00000044308:69973149-69973609:target	Ubr3	ENSMUSG00000044308	1A	69971233-69973149	1	-1	1	-1			0.000316227	0.0934619	0.460698	0.220694	4.36156e-11	-0.510324	0.121097	-0.587857
ENSMUSG00000032826:126932938-126933226:target	Ank2	ENSMUSG00000032826	1B	126930653-126932938	-1	1	-1	0	GO:0086036~regulation of cardiac muscle cell membrane potential	GOTERM_BP_DIRECT	-0.496273	NaN	NaN	-0.615034	-0.664865	0.671332	-0.554389	0.0408976
ENSMUSG00000032826:126988144-126988216:target	Ank2	ENSMUSG00000032826	1B	126986638-126988144	-1	1	-1	0	GO:0086036~regulation of cardiac muscle cell membrane potential	GOTERM_BP_DIRECT	-0.367539	NaN	NaN	0.00050095	-0.26948	0.515484	-0.456311	0.00290417
ENSMUSG00000032826:126921606-126923971:source	Ank2	ENSMUSG00000032826	1B	126923971-126926803	-1	1	-1	0	GO:0086036~regulation of cardiac muscle cell membrane potential	GOTERM_BP_DIRECT	-0.345199	NaN	NaN	-0.0406486	-0.182148	0.297201	-0.476842	0.0411665
ENSMUSG00000069601:69982116-69982302:source	Ank3	ENSMUSG00000069601	1B	69982161-69994372	-1	1	0	1			-0.360084	NaN	NaN	-0.297598	-0.000529416	0.330799	-0.00228695	0.386216
ENSMUSG00000022533:30312423-30315901:source	Atp13a3	ENSMUSG00000022533	1B	30315901-30321806	-1	0	-1	1			0.00512995	NaN	-0.111353	-0.104587	-0.201555	0.0520887	-0.262105	0.34216
ENSMUSG00000040481:107095716-107095925:target	Bptf	ENSMUSG00000040481	1B	107095190-107095716	-1	0	-1	1			0.00170518	-0.914358	NaN	-0.182218	-0.43736	0.074623	-0.624939	0.128523
ENSMUSG00000064302:118559986-118560129:target	Clasp1	ENSMUSG00000064302	1B	118555386-118559986	-1	0	-1	1			-8.14501e-05	-0.244457	NaN	-0.217251	-5.35233e-11	0.00224885	-0.276524	0.22366
ENSMUSG00000064302:118552013-118552156:source	Clasp1	ENSMUSG00000064302	1B	118552156-118555285	-1	0	-1	1			0.00121419	-0.46425	NaN	-0.203041	-1.59478e-13	0.00307053	-0.330641	0.22508
ENSMUSG00000049550:123640494-123640554:target	Clip1	ENSMUSG00000049550	1B	123638988-123640494	-1	1	0	1			0.00435875	-0.0223953	-0.484627	0.0104919	-0.104385	0.152529	-0.0512702	0.252379
ENSMUSG00000020836:77468266-77468413:target	Coro6	ENSMUSG00000020836	1B	77467869-77468266	-1	1	0	1			-0.243344	-0.0893985	0.0024688	-0.197159	-8.67656e-08	0.180898	-0.0430547	0.583029
ENSMUSG00000026131:34299721-34299838:target	Dst	ENSMUSG00000026131	1B	34296759-34299721	-1	1	0	1			-0.110895	-0.495984	-0.25781	-0.0210197	-0.133516	0.107813	-0.00467274	0.26189
ENSMUSG00000026131:34302830-34303032:target	Dst	ENSMUSG00000026131	1B	34301932-34302830	-1	1	0	1			-0.0602901	-0.472058	-0.317323	-0.345389	-0.0198324	0.208996	-0.0807114	0.537955
ENSMUSG00000026131:34295462-34295536:source	Dst	ENSMUSG00000026131	1B	34295536-34296742	-1	1	0	1			-0.285796	-0.516368	-0.543124	-0.00768095	-0.147421	0.11569	-0.097765	0.28271
ENSMUSG00000055762:75896820-75896919:source	Eef1d	ENSMUSG00000055762	1B	75896919-75897226	-1	1	0	1			0.127018	-0.376409	-0.0279609	-0.113842	7.75744e-16	0.31375	0.00128644	0.172085
ENSMUSG00000024937:5717039-5717196:source	Ehbp1l1	ENSMUSG00000024937	1B	5717196-5717662	-1	1	0	1			0.00227762	-0.11586	0.00521014	-0.21712	-0.0621032	0.338918	-0.00182859	0.30985
ENSMUSG00000036022:53254036-53254135:target	Fam122b	ENSMUSG00000036022	1B	53245371-53254036	-1	1	0	1			-0.620214	NaN	NaN	-0.263368	-0.236808	0.354393	NaN	0.1004
ENSMUSG00000027680:34064103-34064320:source	Fxr1	ENSMUSG00000027680	1B	34064319-34064974	-1	1	0	1			-0.0374036	-0.0208551	-0.302895	-0.311665	-3.4643e-07	0.235214	-0.0795285	0.658978
ENSMUSG00000038708:118514180-118514269:source	Golga4	ENSMUSG00000038708	1B	118514269-118519086	-1	1	0	1			-0.0250754	-0.326847	-0.125162	-0.0018836	-0.157305	0.170023	-0.0436363	0.244755
ENSMUSG00000052337:71856912-71857062:target	Immt	ENSMUSG00000052337	1B	71851880-71856912	-1	1	0	1			-0.0238678	-0.0907551	-0.308905	-0.101168	0.000115933	0.244055	-0.0213832	0.33133
ENSMUSG00000052337:71851772-71851886:source	Immt	ENSMUSG00000052337	1B	71851880-71856912	-1	1	0	1			-0.00273136	-0.194306	-0.304249	-0.105252	0.000731297	0.248436	-0.0406422	0.342807
ENSMUSG00000021375:46761273-46761424:target	Kif13a	ENSMUSG00000021375	1B	46760304-46761273	-1	1	0	1			-0.190467	NaN	NaN	-0.241982	-1.43416e-11	0.396224	-0.00593646	0.240909
ENSMUSG00000021798:34571718-34571921:source	Ldb3	ENSMUSG00000021798	1B	34571921-34572990	-1	1	0	1			-0.209326	NaN	-0.0327264	-0.550922	-0.000236259	0.793011	-0.0798643	0.887587
ENSMUSG00000033060:101885291-101885833:source	Lmo7	ENSMUSG00000033060	1B	101885572-101886131	-1	1	0	1			-0.000220229	-0.25608	NaN	-0.208616	1.94077e-06	0.334082	-0.0365191	0.309313
ENSMUSG00000026305:91112156-91112297:target	Lrrfip1	ENSMUSG00000026305	1B	91110447-91112156	-1	0	-1	1			0.00917053	-0.0706534	-0.378285	-0.182746	3.85245e-06	-0.0494695	-0.199209	0.430563
ENSMUSG00000026305:91107298-91107390:source	Lrrfip1	ENSMUSG00000026305	1B	91107390-91108580	-1	0	-1	1			0.00567607	-0.323339	-0.235284	-0.22689	-4.17087e-05	-0.0149581	-0.162517	0.471084
ENSMUSG00000028649:123360910-123361027:source	Macf1	ENSMUSG00000028649	1B	123361027-123364057	-1	0	-1	1			-0.000926253	-0.574035	NaN	-0.344486	-0.43692	-0.065202	-0.219116	0.378548
ENSMUSG00000048416:67384551-67384698:source	Mlf1	ENSMUSG00000048416	1B	67384698-67390978	-1	1	-1	0			0.0748452	-0.355416	-0.00792696	NaN	-0.133855	0.530173	-0.361351	NaN
ENSMUSG00000062526:67228930-67229004:target	Mppe1	ENSMUSG00000062526	1B	67228525-67228930	-1	1	-1	0			-0.473162	NaN	NaN	-0.12891	-0.0346275	0.224453	-0.446412	0.068663
ENSMUSG00000009073:4781937-4782352:target	Nf2	ENSMUSG00000009073	1B	4780622-4782187	-1	1	-1	0			-0.00924573	-0.0001093	-0.332332	-0.291208	-0.684633	0.367975	-0.121174	-0.0002238
ENSMUSG00000025812:127415570-127415797:target	Pard3	ENSMUSG00000025812	1B	127409707-127415570	-1	1	0	1			-0.640002	NaN	NaN	-0.326186	-0.446032	0.220422	-0.00802302	0.276015
ENSMUSG00000028273:142303943-142303984:target	Pdlim5	ENSMUSG00000028273	1B	142303421-142303943	-1	1	0	1			-0.00103729	-0.189065	-0.0288985	-0.18086	-0.00185349	0.38823	-0.0241743	0.424483
ENSMUSG00000036879:86024281-86024338:source	Phkb	ENSMUSG00000036879	1B	86024338-86025198	-1	1	0	1			0.457424	-0.761759	-0.00299578	-0.304749	-5.89579e-05	0.444661	-0.0042759	0.512888
ENSMUSG00000040648:97713004-97715149:source	Ppip5k2	ENSMUSG00000040648	1B	97713144-97716542	-1	1	-1	0			-0.102498	NaN	NaN	-0.192456	-0.326311	0.290373	-0.17108	0.0176588
ENSMUSG00000003226:58483029-58483199:target	Ranbp2	ENSMUSG00000003226	1B	58481396-58483029	-1	1	0	1			-0.0473172	NaN	-0.18692	-0.237247	-8.10995e-15	0.159341	-0.0914103	0.335141
ENSMUSG00000017686:80254660-80254862:source	Rhot1	ENSMUSG00000017686	1B	80254862-80257514	-1	1	0	1			-0.171117	NaN	NaN	-0.122274	-0.0640397	0.129341	-0.058984	0.25611
ENSMUSG00000020580:16977873-16978102:source	Rock2	ENSMUSG00000020580	1B	16978102-16982651	-1	1	0	1			-0.372366	-0.0301367	NaN	-0.368696	-6.1264e-14	0.114488	0.0894782	0.371716
ENSMUSG00000061904:91123519-91123708:target	Slc25a3	ENSMUSG00000061904	1B	91122331-91123558	-1	1	0	1			-0.342596	-0.595885	-0.436854	-0.224168	7.77156e-16	0.418975	-0.0117757	0.555278
ENSMUSG00000061904:91119526-91119837:source	Slc25a3	ENSMUSG00000061904	1B	91119706-91122207	-1	1	0	1			-0.26249	-0.182593	-0.338003	-0.237773	7.77156e-16	0.432107	-0.0493306	0.519255
ENSMUSG00000025006:40318018-40318068:source	Sorbs1	ENSMUSG00000025006	1B	40318068-40321793	-1	1	-1	0			-0.277609	-0.0532248	-0.050037	-0.338045	-0.326574	0.542336	-0.419021	0.0845669
ENSMUSG00000031626:45769829-45769895:source	Sorbs2	ENSMUSG00000031626	1B	45769895-45770546	-1	0	-1	1			-0.172903	0.0186129	NaN	-0.163355	-0.229953	-0.0132961	-0.12231	0.120615
ENSMUSG00000031626:45658670-45658941:target	Sorbs2	ENSMUSG00000031626	1B	45658471-45658803	-1	1	0	1			0.00835716	-0.658222	NaN	-0.154752	7.15784e-06	0.212317	-2.20476e-05	0.86549
ENSMUSG00000019487:57255273-57255467:source	Trip10	ENSMUSG00000019487	1B	57255467-57256860	-1	1	0	1			-0.0043517	-0.00432608	-0.466998	-0.22433	-0.000129933	0.16407	0.0253451	0.3623
ENSMUSG00000019487:57257235-57257344:target	Trip10	ENSMUSG00000019487	1B	57257027-57257235	-1	1	0	1			-0.200891	NaN	-0.271514	-0.204931	-0.000275606	0.236703	0.0803104	0.360053
ENSMUSG00000022867:77093603-77093742:source	Usp25	ENSMUSG00000022867	1B	77093742-77097649	-1	0	-1	1			-0.00244674	-0.555859	-0.106994	-0.313993	-8.67817e-09	0.0514274	-0.170125	0.42299
ENSMUSG00000032267:49032509-49032688:source	Usp28	ENSMUSG00000032267	1B	49032688-49033577	-1	1	-1	0			-0.00308007	-0.244954	-0.187446	-0.364053	NaN	0.173236	-0.428221	NaN
ENSMUSG00000059263:112023506-112023746:source	Usp47	ENSMUSG00000059263	1B	112023746-112046927	-1	1	0	1			-0.439674	-0.100855	-0.339915	-0.269788	-0.0398227	0.715527	-0.0109414	0.378545
ENSMUSG00000040407:4029840-4030052:source	Akap9	ENSMUSG00000040407	1B	4030052-4032681	1	-1	0	-1			0.289093	NaN	NaN	0.208736	0.155801	-0.302336	0.00610767	-0.55612
ENSMUSG00000032826:126981800-126981944:source	Ank2	ENSMUSG00000032826	1B	126981944-126988144	1	-1	1	0	GO:0086036~regulation of cardiac muscle cell membrane potential	GOTERM_BP_DIRECT	0.284189	NaN	NaN	-0.000716478	0.2323	-0.482272	0.56361	-0.0018104
ENSMUSG00000032826:126929998-126930081:source	Ank2	ENSMUSG00000032826	1B	126930081-126932938	1	-1	1	0	GO:0086036~regulation of cardiac muscle cell membrane potential	GOTERM_BP_DIRECT	0.469595	NaN	NaN	0.6074	0.696968	-0.433528	0.573699	-0.0355357
ENSMUSG00000034842:92411142-92411195:source	Art3	ENSMUSG00000034842	1B	92411195-92414242	1	-1	0	-1			0.215149	-0.0214968	0.230987	0.695682	0.00768244	-0.138148	0.0136387	-0.865795
ENSMUSG00000034842:92414242-92414628:target	Art3	ENSMUSG00000034842	1B	92411195-92414242	1	-1	0	-1			0.177164	-0.022283	0.164622	0.67724	0.0135017	-0.164356	0.00866424	-0.86853
ENSMUSG00000028207:9610843-9610999:source	Asph	ENSMUSG00000028207	1B	9610938-9635901	1	-1	0	-1			0.201518	0.0453272	NaN	0.120141	0.00100836	-0.376543	0.0123425	-0.145891
ENSMUSG00000021820:20760144-20760186:target	Camk2g	ENSMUSG00000021820	1B	20755702-20760144	1	-1	0	-1			0.282894	NaN	0.00884671	0.230296	0.147129	-0.124112	-0.000235556	-0.113479
ENSMUSG00000058690:36896254-36896344:target	Ccser2	ENSMUSG00000058690	1B	36879762-36896255	1	-1	1	0			0.00199989	NaN	0.235709	0.252941	0.508514	-0.120825	0.211128	-0.0123061
ENSMUSG00000020836:77466415-77466599:source	Coro6	ENSMUSG00000020836	1B	77466599-77466766	1	-1	1	0			0.11579	0.290214	0.010686	0.223827	-0.000101729	-0.167163	0.454522	0.00124244
ENSMUSG00000022995:181908298-181908376:source	Enah	ENSMUSG00000022995	1B	181908376-181913307	1	-1	0	-1			0.453368	0.114527	NaN	0.47491	0.0443735	-0.294454	0.00585137	-0.577986
ENSMUSG00000022995:181913307-181913373:target	Enah	ENSMUSG00000022995	1B	181908376-181913307	1	-1	0	-1			0.483	0.389666	NaN	0.488849	0.0140827	-0.404936	0.00740804	-0.606886
ENSMUSG00000062054:21321334-21321455:target	Iah1	ENSMUSG00000062054	1B	21319931-21321334	1	-1	0	-1			0.0402295	0.140154	NaN	0.219921	0.00713485	-0.172024	0.00126298	-0.176204
ENSMUSG00000056999:37295883-37295965:target	Ide	ENSMUSG00000056999	1B	37290814-37295883	1	-1	0	-1			0.165797	-0.00759609	0.0182578	0.151332	7.92465e-09	-0.297342	-0.0452284	-0.194273
ENSMUSG00000020640:4649983-4650119:target	Itsn2	ENSMUSG00000020640	1B	4639794-4649983	1	0	1	-1			0.111412	NaN	NaN	0.122469	2.37305e-07	0.00733476	0.164233	-0.169635
ENSMUSG00000032497:111170256-111170415:target	Lrrfip2	ENSMUSG00000032497	1B	111161389-111170256	1	-1	0	-1			0.189007	NaN	NaN	0.254626	-0.0518862	-0.498629	0.0700344	-0.744957
ENSMUSG00000028649:123365269-123365347:target	Macf1	ENSMUSG00000028649	1B	123361027-123365273	1	0	1	-1			0.00515521	0.358098	NaN	0.356582	0.459223	0.0661317	0.197967	-0.393518
ENSMUSG00000002948:4243264-4243445:target	Map2k7	ENSMUSG00000002948	1B	4239033-4243304	1	-1	0	-1			0.0728785	0.013609	0.381443	0.148313	0.000338542	-0.254007	0.0121652	-0.377795
ENSMUSG00000002948:4238740-4239033:source	Map2k7	ENSMUSG00000002948	1B	4239033-4243304	1	-1	0	-1			0.10215	0.00809359	0.436793	0.138768	0.000752887	-0.28445	0.0248955	-0.304434
ENSMUSG00000032479:110063017-110063123:target	Map4	ENSMUSG00000032479	1B	110036855-110063017	1	-1	0	-1			0.250391	0.213783	0.179236	0.613723	2.09662e-07	-0.763117	0.0996236	-0.664652
ENSMUSG00000029020:147903355-147903497:target	Mfn2	ENSMUSG00000029020	1B	147898642-147903355	1	-1	0	-1			0.244295	0.196253	0.43065	0.311915	0.000322061	-0.20281	0.000888968	-0.431419
ENSMUSG00000048416:67392840-67392975:target	Mlf1	ENSMUSG00000048416	1B	67384698-67392892	1	-1	1	0			-0.104408	0.37813	0.0743513	NaN	0.100242	-0.546582	0.400346	NaN
ENSMUSG00000069769:88348784-88348992:target	Msi2	ENSMUSG00000069769	1B	88347125-88348784	1	-1	0	-1			-0.0558614	0.205505	NaN	0.177945	0.0125002	-0.233662	0.00247187	-0.486103
ENSMUSG00000036564:95711093-95711642:source	Ndrg4	ENSMUSG00000036564	1B	95711144-95713178	1	-1	0	-1			0.160144	NaN	NaN	0.367645	0.115619	-0.525576	1.37464e-09	-0.490266
ENSMUSG00000024589:65178919-65178996:target	Nedd4l	ENSMUSG00000024589	1B	65174242-65178919	1	-1	0	-1			0.335253	NaN	NaN	0.116356	7.36826e-09	-0.155592	0.0494337	-0.328906
ENSMUSG00000049134:56388749-56388836:source	Nrap	ENSMUSG00000049134	1B	56388836-56389806	1	-1	0	-1	GO:0051371~muscle alpha-actinin binding	GOTERM_MF_DIRECT	0.226165	0.309937	0.359635	0.319543	0.114165	-0.51758	0.0555758	-0.329401
ENSMUSG00000058056:61515203-61515336:target	Palld	ENSMUSG00000058056	1B	61513524-61515203	1	-1	0	-1			0.125218	0.0292773	0.347318	0.262184	3.4101e-10	-0.218134	0.0269882	-0.252605
ENSMUSG00000058056:61513246-61513524:source	Palld	ENSMUSG00000058056	1B	61513524-61515203	1	-1	0	-1			0.0343894	0.000209325	0.606347	0.209035	3.52118e-15	-0.145062	0.048449	-0.21072
ENSMUSG00000042323:31117013-31117083:target	Pbrm1	ENSMUSG00000042323	1B	31114004-31117013	1	0	1	-1			0.397906	NaN	NaN	0.625463	0.615936	-0.00305079	0.281801	-0.226286
ENSMUSG00000001151:76408698-76408910:target	Pcnt	ENSMUSG00000001151	1B	76404651-76408698	1	-1	0	-1	Calmodulin-binding;GO:0005516~calmodulin binding	UP_KEYWORDS;GOTERM_MF_DIRECT	0.703572	NaN	NaN	0.30915	-1.54979e-06	-0.793388	0.0562301	-0.519436
ENSMUSG00000001151:76404422-76404651:source	Pcnt	ENSMUSG00000001151	1B	76404651-76408698	1	-1	0	-1	Calmodulin-binding;GO:0005516~calmodulin binding	UP_KEYWORDS;GOTERM_MF_DIRECT	0.710007	NaN	0.0297174	0.314297	7.76833e-08	-0.792262	0.0876633	-0.52404
ENSMUSG00000028273:142304705-142304722:source	Pdlim5	ENSMUSG00000028273	1B	142304722-142312123	1	-1	1	0			0.129373	0.000514672	NaN	0.248458	NaN	-0.352054	0.158663	NaN
ENSMUSG00000039361:90191654-90191753:source	Picalm	ENSMUSG00000039361	1B	90191753-90195655	1	-1	1	0			0.122243	0.0130097	-0.0638832	-0.00217067	0.163219	-0.12965	0.172974	0.053846
ENSMUSG00000038502:44863068-44863194:source	Ptov1	ENSMUSG00000038502	1B	44863194-44863195	1	0	1	-1			0.0322651	NaN	0.404148	0.159936	0.115659	NaN	0.262202	-0.260076
ENSMUSG00000006673:108518703-108518826:source	Qrich1	ENSMUSG00000006673	1B	108518826-108528589	1	-1	0	-1			0.286906	NaN	NaN	0.236581	0.000223514	-0.455343	NaN	-0.207895
ENSMUSG00000033565:77086067-77086155:source	Rbfox2	ENSMUSG00000033565	1B	77086155-77094451	1	0	1	-1			0.000933853	-0.010758	0.183881	0.185181	0.200442	0.0293253	0.179932	-0.401143
ENSMUSG00000020580:16984638-16988274:target	Rock2	ENSMUSG00000020580	1B	16978102-16984638	1	-1	0	-1			0.287734	0.0230773	0.501711	0.358986	5.82503e-14	-0.166678	-0.0916327	-0.355632
ENSMUSG00000061306:120106434-120106988:source	Slc38a10	ENSMUSG00000061306	1B	120106610-120109432	1	-1	0	-1			0.271295	NaN	NaN	0.142345	0.00716386	-0.177904	0.00375742	-0.140924
ENSMUSG00000025369:128487934-128488359:source	Smarcc2	ENSMUSG00000025369	1B	128488359-128488896	1	-1	1	0			0.00647764	-0.000606216	0.305806	0.313024	0.525477	-0.124456	0.239505	-0.026353
ENSMUSG00000025369:128488896-128490173:target	Smarcc2	ENSMUSG00000025369	1B	128488359-128488896	1	-1	1	0			0.00383731	0.00111795	0.343184	0.306703	0.547692	-0.120628	0.23053	-0.0351154
ENSMUSG00000005899:17631986-17632057:source	Smpd4	ENSMUSG00000005899	1B	17632057-17638496	1	-1	0	-1			0.510836	NaN	NaN	0.247852	0.182439	-0.511327	0.071668	-0.117949
ENSMUSG00000041476:157720426-157721079:source	Smpx	ENSMUSG00000041476	1B	157721079-157752172	1	-1	1	0	GO:0031430~M band;GO:0043292~contractile fiber	GOTERM_CC_DIRECT;GOTERM_CC_DIRECT	0.307709	0.218919	0.0088476	0.291049	NaN	-0.248572	0.111233	NaN
ENSMUSG00000027287:120594801-120595424:target	Snap23	ENSMUSG00000027287	1B	120586276-120594801	1	-1	0	-1			0.517339	NaN	NaN	0.289155	6.39081e-08	-0.336257	0.0147169	-0.385069
ENSMUSG00000027287:120586159-120586276:source	Snap23	ENSMUSG00000027287	1B	120586276-120594801	1	-1	0	-1			0.615191	NaN	NaN	0.327996	0.000517819	-0.389582	0.00959963	-0.398414
ENSMUSG00000020315:30104436-30105713:source	Sptbn1	ENSMUSG00000020315	1B	30104674-30109089	1	0	1	-1			0.266095	0.140267	0.0023734	0.197793	0.043837	-0.0228555	0.240324	-0.200633
ENSMUSG00000020954:51633532-51633719:source	Strn3	ENSMUSG00000020954	1B	51633719-51643104	1	-1	1	0			0.693605	NaN	NaN	0.474196	0.568594	-0.179631	0.548953	-0.0930023
ENSMUSG00000028899:132274375-132274752:source	Taf12	ENSMUSG00000028899	1B	132274487-132282794	1	-1	0	-1			0.154898	NaN	NaN	0.310985	0.00058255	-0.378165	0.0164358	-0.337999
ENSMUSG00000009035:79365285-79365479:target	Tmem184b	ENSMUSG00000009035	1B	79362885-79365285	1	0	1	-1			-0.0204911	NaN	0.456016	0.223411	0.000290003	0.0981485	0.255398	-0.36002
ENSMUSG00000032366:67032220-67032541:source	Tpm1	ENSMUSG00000032366	1B	67032541-67032794	1	-1	0	-1			-0.000431223	NaN	0.81728	0.230852	0.00997794	-0.242894	0.0111032	-0.296905
ENSMUSG00000047921:73052162-73052307:source	Trappc9	ENSMUSG00000047921	1B	73052307-73057922	1	-1	0	-1			0.160923	NaN	NaN	0.117734	4.11164e-10	-0.42026	-0.00725374	-0.178926
ENSMUSG00000024583:63662801-63664332:source	Txnl1	ENSMUSG00000024583	1B	63664332-63671582	1	-1	0	-1			0.0484856	0.0318368	0.546529	0.156437	7.77156e-16	-0.243048	-0.00104825	-0.15612
ENSMUSG00000024583:63671582-63671686:target	Txnl1	ENSMUSG00000024583	1B	63664332-63671582	1	-1	0	-1			0.0123254	0.0148339	0.475334	0.163524	7.77156e-16	-0.2526	0.000700657	-0.160315
ENSMUSG00000059263:112053217-112053420:target	Usp47	ENSMUSG00000059263	1B	112023746-112053217	1	-1	0	-1			0.551054	0.111487	0.552125	0.246635	0.0135354	-0.696643	0.00897283	-0.355456
ENSMUSG00000097729:80131814-80131959:target	2310015A10Rik	ENSMUSG00000097729	1C	80125126-80131814	-1	0	-1	0			-0.70016	NaN	NaN	-0.18625	-0.27558	0.0459385	-0.115285	-0.0635661
ENSMUSG00000097729:80120548-80125126:source	2310015A10Rik	ENSMUSG00000097729	1C	80125126-80131814	-1	0	-1	0			-0.681301	NaN	NaN	-0.176264	-0.0192782	-0.00215176	-0.276078	-0.0134483
ENSMUSG00000062825:120347492-120347536:source	Actg1	ENSMUSG00000062825	1C	120347536-120347636	-1	0	0	1	mmu05410:Hypertrophic cardiomyopathy (HCM);mmu05414:Dilated cardiomyopathy;mmu04810:Regulation of actin cytoskeleton;GO:0045214~sarcomere organization;GO:0030016~myofibril	KEGG_PATHWAY;KEGG_PATHWAY;KEGG_PATHWAY;GOTERM_BP_DIRECT;GOTERM_CC_DIRECT	-0.0222619	0.142906	-0.417922	-0.0651486	-0.306896	0.0512598	0.0893674	0.119209
ENSMUSG00000029106:34619849-34620451:source	Add1	ENSMUSG00000029106	1C	34620134-34620832	-1	1	0	0			-0.0145782	0.117143	-0.113192	-0.139229	-0.153506	0.20233	0.0203495	0.056713
ENSMUSG00000032826:126964938-126965162:source	Ank2	ENSMUSG00000032826	1C	126965162-126971003	-1	0	0	1	GO:0086036~regulation of cardiac muscle cell membrane potential	GOTERM_BP_DIRECT	-0.253114	NaN	NaN	-0.0581623	-0.123146	0.0321383	0.0115828	0.22783
ENSMUSG00000025781:10056016-10056161:source	Atp5c1	ENSMUSG00000025781	1C	10056161-10058996	-1	0	0	1			0.00740117	-0.0545705	-0.125513	-0.0547141	-0.386532	0.000499881	8.50556e-16	0.337945
ENSMUSG00000024381:32424820-32424967:target	Bin1	ENSMUSG00000024381	1C	32423286-32424820	-1	0	0	1	GO:0030018~Z disc;GO:0030315~T-tubule;GO:0031674~I band	GOTERM_CC_DIRECT;GOTERM_CC_DIRECT;GOTERM_CC_DIRECT	-2.61193e-06	NaN	-0.287695	-0.610717	7.77156e-16	-0.00215811	8.41292e-06	0.689474
ENSMUSG00000024381:32421776-32421960:source	Bin1	ENSMUSG00000024381	1C	32421960-32423242	-1	0	0	1	GO:0030018~Z disc;GO:0030315~T-tubule;GO:0031674~I band	GOTERM_CC_DIRECT;GOTERM_CC_DIRECT;GOTERM_CC_DIRECT	-5.40586e-06	NaN	-0.218876	-0.596402	7.77156e-16	-0.000275994	6.86535e-08	0.680419
ENSMUSG00000053819:126840137-126840459:source	Camk2d	ENSMUSG00000053819	1C	126840365-126841485	-1	1	0	0	GO:0016529~sarcoplasmic reticulum;Sarcoplasmic reticulum;GO:1901897~regulation of relaxation of cardiac muscle;GO:0060048~cardiac muscle contraction;GO:0014704~intercalated disc;GO:0031594~neuromuscular junction;GO:0033017~sarcoplasmic reticulum membrane	GOTERM_CC_DIRECT;UP_KEYWORDS;GOTERM_BP_DIRECT;GOTERM_BP_DIRECT;GOTERM_CC_DIRECT;GOTERM_CC_DIRECT;GOTERM_CC_DIRECT	-0.0151657	-0.21034	NaN	-0.139958	-0.0388129	0.282817	0.00282822	-0.0843604
ENSMUSG00000053819:126801717-126801761:source	Camk2d	ENSMUSG00000053819	1C	126801761-126805857	-1	0	0	1	GO:0016529~sarcoplasmic reticulum;Sarcoplasmic reticulum;GO:1901897~regulation of relaxation of cardiac muscle;GO:0060048~cardiac muscle contraction;GO:0014704~intercalated disc;GO:0031594~neuromuscular junction;GO:0033017~sarcoplasmic reticulum membrane	GOTERM_CC_DIRECT;UP_KEYWORDS;GOTERM_BP_DIRECT;GOTERM_BP_DIRECT;GOTERM_CC_DIRECT;GOTERM_CC_DIRECT;GOTERM_CC_DIRECT	-0.358432	-0.233207	NaN	-0.399534	-1.57916e-05	-0.00891479	0.000165776	0.391896
ENSMUSG00000053819:126842758-126844913:target	Camk2d	ENSMUSG00000053819	1C	126841573-126842758	-1	1	0	0	GO:0016529~sarcoplasmic reticulum;Sarcoplasmic reticulum;GO:1901897~regulation of relaxation of cardiac muscle;GO:0060048~cardiac muscle contraction;GO:0014704~intercalated disc;GO:0031594~neuromuscular junction;GO:0033017~sarcoplasmic reticulum membrane	GOTERM_CC_DIRECT;UP_KEYWORDS;GOTERM_BP_DIRECT;GOTERM_BP_DIRECT;GOTERM_CC_DIRECT;GOTERM_CC_DIRECT;GOTERM_CC_DIRECT	-0.154603	-0.0218785	NaN	-0.102112	-0.0404832	0.309286	0.00107531	-0.0431226
ENSMUSG00000029062:155625531-155625696:source	Cdk11b	ENSMUSG00000029062	1C	155625654-155626774	-1	0	-1	0			-0.0898625	-0.520927	-0.0114644	0.00025557	-0.12038	-0.000884292	-0.241316	-0.0196774
ENSMUSG00000020836:77467750-77467869:source	Coro6	ENSMUSG00000020836	1C	77467869-77468266	-1	0	0	1			-0.19393	-0.13967	-0.00454513	-0.183285	-0.000304313	0.00394898	-0.0826865	0.725086
ENSMUSG00000022770:31853651-31853884:target	Dlg1	ENSMUSG00000022770	1C	31846933-31853843	-1	0	-1	0			-0.386966	-0.00871738	-0.0213233	-0.0700616	-0.24229	0.053904	-0.22475	-0.00206322
ENSMUSG00000026131:34299721-34299838:source	Dst	ENSMUSG00000026131	1C	34299838-34301861	-1	0	0	1			-0.120948	-0.239656	-0.187582	-0.362432	-0.063637	0.0908856	-0.0529749	0.590654
ENSMUSG00000024302:23631332-23631428:source	Dtna	ENSMUSG00000024302	1C	23631428-23633218	-1	0	0	1			-0.2095	0.0114363	-0.0251061	-0.32191	-0.0559509	NaN	0.000386839	0.606497
ENSMUSG00000036022:53243415-53246290:source	Fam122b	ENSMUSG00000036022	1C	53245371-53254036	-1	1	0	0			-0.419476	NaN	NaN	-0.260023	-0.275688	0.393126	NaN	0.0202145
ENSMUSG00000028034:152232255-152234570:source	Fubp1	ENSMUSG00000028034	1C	152234570-152234571	-1	1	0	0			-0.325859	NaN	NaN	-0.0177589	-0.106526	0.438635	0.0580742	-0.00173322
ENSMUSG00000093593:25835277-25835377:target	Gm20683	ENSMUSG00000093593	1C	25835197-25835277	-1	0	0	1			-0.108631	NaN	-0.0125826	-0.150888	0.00213872	NaN	-0.00171878	0.289117
ENSMUSG00000021843:47733227-47733322:source	Ktn1	ENSMUSG00000021843	1C	47733322-47734155	-1	0	-1	0			-0.00221809	NaN	-0.132119	-0.165378	-0.211572	-0.0342611	-0.131224	0.0383508
ENSMUSG00000021798:34572990-34573012:target	Ldb3	ENSMUSG00000021798	1C	34571921-34572990	-1	1	0	0			-0.294374	NaN	-0.0304732	-0.448536	NaN	0.717283	-0.0335136	NaN
ENSMUSG00000026305:91101185-91101310:source	Lrrfip1	ENSMUSG00000026305	1C	91101310-91103247	-1	0	0	1			-0.00230256	NaN	-0.561175	-0.426198	-0.533804	-0.0275307	0.0167796	0.226534
ENSMUSG00000028849:126240023-126240137:target	Map7d1	ENSMUSG00000028849	1C	126238632-126240023	-1	0	-1	0			-0.0181852	NaN	-0.309997	-0.115651	-0.185799	0.00654719	-0.142707	0.0580516
ENSMUSG00000053436:28741619-28741866:target	Mapk14	ENSMUSG00000053436	1C	28737090-28741788	-1	1	0	0			-0.00356841	0.00663586	-0.150529	-0.137287	-0.000901935	0.230675	-0.0539621	0.038787
ENSMUSG00000029020:147898021-147898642:source	Mfn2	ENSMUSG00000029020	1C	147898642-147902928	-1	0	0	1			-0.291088	-0.0244927	-0.410723	-0.281648	-8.35867e-05	0.0657561	-0.0387168	0.40038
ENSMUSG00000090841:128492059-128492155:target	Myl6	ENSMUSG00000090841	1C	128491764-128492059	-1	0	-1	0			-0.0124142	-0.108025	0.0248509	-0.0367992	-0.262197	-0.00850311	-0.223121	-0.0190938
ENSMUSG00000018736:68829303-68830066:target	Ndel1	ENSMUSG00000018736	1C	68826204-68829915	-1	0	-1	0			-0.31008	-0.0167219	-0.297645	0.0216567	-0.264605	-0.00403876	-0.207326	0.0458207
ENSMUSG00000031644:61054520-61054622:source	Nek1	ENSMUSG00000031644	1C	61054622-61071751	-1	1	0	0			-0.477103	NaN	NaN	-0.332942	-0.465149	0.240885	NaN	0.0936943
ENSMUSG00000049134:56378055-56378171:target	Nrap	ENSMUSG00000049134	1C	56374468-56378055	-1	0	0	1	GO:0051371~muscle alpha-actinin binding	GOTERM_MF_DIRECT	-7.93008e-12	-2.76408e-05	-0.355938	-0.28324	-1.08585e-05	7.7705e-16	7.77156e-16	0.280944
ENSMUSG00000049134:56372807-56372914:source	Nrap	ENSMUSG00000049134	1C	56372914-56374364	-1	0	0	1	GO:0051371~muscle alpha-actinin binding	GOTERM_MF_DIRECT	-3.06158e-12	-2.78832e-05	-0.371082	-0.288528	-1.08945e-05	7.77156e-16	7.77156e-16	0.288203
ENSMUSG00000025812:127409556-127409707:source	Pard3	ENSMUSG00000025812	1C	127409707-127415570	-1	0	0	1			-0.71131	NaN	NaN	-0.369912	-0.436605	0.012439	-0.00238386	0.261301
ENSMUSG00000039449:4648241-4648318:target	Prpf18	ENSMUSG00000039449	1C	4648123-4648241	-1	0	0	1			-0.00184649	NaN	-0.683917	-0.199423	-2.30608e-13	0.0381179	-0.000994174	0.196076
ENSMUSG00000013236:56426387-56426504:source	Ptprs	ENSMUSG00000013236	1C	56426504-56427791	-1	0	0	1			-0.000153548	-0.620945	NaN	-0.104019	-1.65197e-07	0.0755963	NaN	0.328829
ENSMUSG00000026014:60493323-60493680:target	Raph1	ENSMUSG00000026014	1C	60491535-60493538	-1	0	0	1			-0.178375	-0.00494282	NaN	-0.267809	-0.212957	NaN	-0.00114009	0.269386
ENSMUSG00000025735:25835277-25835377:target	Rhbdl1	ENSMUSG00000025735	1C	25835197-25835277	-1	0	0	1			-0.105008	NaN	-0.0128765	-0.148857	0.0020449	NaN	-0.00140556	0.284365
ENSMUSG00000036087:72958149-72958286:source	Slain2	ENSMUSG00000036087	1C	72958286-72965804	-1	1	0	0			-0.199069	-0.00707971	-0.0248247	-0.372455	-0.40152	0.501632	-0.0494876	0.0825207
ENSMUSG00000025006:40324747-40324832:target	Sorbs1	ENSMUSG00000025006	1C	40321960-40324747	-1	1	0	0			-0.242792	-0.0561166	-0.0278271	-0.344603	-0.311252	0.545713	-0.0520178	0.0761426
ENSMUSG00000051747:76965091-76965243:target	Ttn	ENSMUSG00000051747	1C	76964612-76965091	-1	1	0	0	GO:0005865~striated muscle thin filament;GO:0031672~A band;GO:0005509~calcium ion binding	GOTERM_CC_DIRECT;GOTERM_CC_DIRECT;GOTERM_MF_DIRECT	-0.493629	NaN	NaN	-0.22504	NaN	0.143619	0.0027778	NaN
ENSMUSG00000037470:36176233-36176329:source	Uggt1	ENSMUSG00000037470	1C	36176327-36176776	-1	0	0	1			0.000196073	-0.434341	NaN	-0.276247	-0.633929	-0.0135363	-0.0180287	0.19008
ENSMUSG00000054808:28894501-28894852:source	Actn4	ENSMUSG00000054808	1C	28894659-28895432	1	0	0	-1			-0.0416186	0.156757	NaN	0.116699	0.000515878	0.0498887	-0.00598644	-0.20242
ENSMUSG00000030766:123286498-123287013:target	Arhgap17	ENSMUSG00000030766	1C	123285467-123286498	1	0	1	0			0.142864	NaN	NaN	0.152451	0.313105	NaN	0.233011	0.00100363
ENSMUSG00000022098:70490020-70490251:target	Bmp1	ENSMUSG00000022098	1C	70486272-70490020	1	0	0	-1			-0.00844903	0.578006	NaN	0.246608	0.225821	-0.00920991	0.00104756	-0.138045
ENSMUSG00000044033:77014394-77015250:target	Ccdc141	ENSMUSG00000044033	1C	77011757-77014394	1	0	1	0			0.355344	NaN	NaN	0.515323	0.467833	-0.040174	0.193553	-0.0114474
ENSMUSG00000058690:36874936-36879762:source	Ccser2	ENSMUSG00000058690	1C	36879762-36896255	1	0	1	0			0.00154728	0.0445543	0.340533	0.213766	0.479797	-0.0561715	0.162625	-0.00703961
ENSMUSG00000049550:123630225-123631169:source	Clip1	ENSMUSG00000049550	1C	123631169-123635174	1	0	1	0			0.241938	0.288985	0.0314517	0.219636	0.0579303	-0.0923177	0.231608	0.00949107
ENSMUSG00000020836:77466766-77466975:target	Coro6	ENSMUSG00000020836	1C	77466599-77466766	1	0	1	0			0.0098988	0.174365	NaN	0.167722	0.00293809	0.0708844	0.213076	0.0351662
ENSMUSG00000026571:165339830-165340023:source	Dcaf6	ENSMUSG00000026571	1C	165340023-165350884	1	0	0	-1			0.0196615	0.12485	0.138979	0.200148	3.7725e-05	-0.0571553	-0.000578071	-0.191916
ENSMUSG00000078515:141677549-141685631:source	Ddi2	ENSMUSG00000078515	1C	141685631-141689270	1	0	0	-1			-0.00170202	NaN	0.420703	0.180806	-0.0013733	-0.00677105	-0.00111695	-0.555941
ENSMUSG00000022789:16316602-16316778:source	Dnm1l	ENSMUSG00000022789	1C	16316778-16318445	1	0	1	0			0.478689	NaN	NaN	0.297041	0.278951	-0.0992786	0.291613	-0.0696505
ENSMUSG00000063524:150241715-150241825:target	Eno1	ENSMUSG00000063524	1C	150241714-150241715	1	0	0	-1			0.165975	-0.000813218	-8.44033e-05	0.269076	0.402645	-0.00482377	0.00596381	-0.519056
ENSMUSG00000011831:107812358-107812411:target	Evi5	ENSMUSG00000011831	1C	107799260-107812358	1	0	0	-1			0.212892	NaN	NaN	0.491736	0.745268	0.000943696	0.0227296	-0.127775
ENSMUSG00000028995:23960931-23965358:source	Fam126a	ENSMUSG00000028995	1C	23965358-23979488	1	0	1	0			0.000634116	0.10158	NaN	0.516739	0.827765	0.0138473	0.167802	-0.000834798
ENSMUSG00000092137:71555585-71555737:target	Gcom1	ENSMUSG00000092137	1C	71552364-71555585	1	0	0	-1			0.0627557	0.116555	NaN	0.355964	-1.96311e-06	7.77162e-16	0.00355859	-0.351511
ENSMUSG00000038708:118522518-118522583:target	Golga4	ENSMUSG00000038708	1C	118514269-118522518	1	0	0	-1			0.00533035	0.544025	0.136454	0.00598152	0.129337	-0.0429872	0.0265058	-0.230999
ENSMUSG00000062054:21319770-21319931:source	Iah1	ENSMUSG00000062054	1C	21319931-21321334	1	-1	0	0			0.174542	0.0123631	NaN	0.14346	0.000560926	-0.408695	-0.060588	-0.0996137
ENSMUSG00000025348:128957290-128958277:target	Itga7	ENSMUSG00000025348	1C	128954071-128957621	1	0	0	-1			5.10904e-06	-0.00498838	0.190648	0.310555	0.000234231	1.48501e-05	-0.0140737	-0.302614
ENSMUSG00000028184:148846849-148847032:source	Lphn2	ENSMUSG00000028184	1C	148847032-148850836	1	-1	0	0			0.000422744	0.558064	NaN	0.238907	0.197751	-0.128699	0.013518	-0.0961139
ENSMUSG00000026305:91105127-91105297:target	Lrrfip1	ENSMUSG00000026305	1C	91101310-91105127	1	0	0	-1			0.000751595	-0.0142737	0.343487	0.439434	0.48457	0.0112229	-0.000546788	-0.231738
ENSMUSG00000032497:111188762-111188806:target	Lrrfip2	ENSMUSG00000032497	1C	111161389-111188762	1	0	0	-1			0.261143	NaN	0.0434022	0.175544	6.96824e-05	-0.0289146	0.0425963	-0.509547
ENSMUSG00000027763:60615620-60615773:source	Mbnl1	ENSMUSG00000027763	1C	60615773-60621423	1	0	1	0			0.085599	-0.0103703	0.175187	0.474725	0.58911	-0.0463097	0.199766	-0.000425711
ENSMUSG00000027763:60622146-60622240:target	Mbnl1	ENSMUSG00000027763	1C	60621458-60622146	1	0	1	0			0.0790291	0.058868	0.422407	0.42971	0.514147	-0.0511209	0.137075	-0.00330399
ENSMUSG00000024150:87257928-87258089:source	Mcfd2	ENSMUSG00000024150	1C	87258089-87258750	1	-1	0	0			0.232948	NaN	NaN	0.260436	0.291463	-0.10985	-0.0946262	-0.00599955
ENSMUSG00000020184:117705155-117705229:source	Mdm2	ENSMUSG00000020184	1C	117705229-117709946	1	-1	0	0			0.657158	NaN	NaN	0.101623	0.0484939	-0.102251	-0.0529951	-0.0651348
ENSMUSG00000041361:71555585-71555737:target	Myzap	ENSMUSG00000041361	1C	71552364-71555585	1	0	0	-1			0.0659099	0.118938	NaN	0.358267	-1.8915e-06	1.02778e-15	0.00220521	-0.356371
ENSMUSG00000036528:107708780-107708872:target	Ppfibp2	ENSMUSG00000036528	1C	107697698-107708780	1	-1	0	0			0.523292	NaN	NaN	0.483918	NaN	-0.403292	NaN	NaN
ENSMUSG00000039449:4645569-4645673:source	Prpf18	ENSMUSG00000039449	1C	4645673-4648241	1	0	0	-1			0.00287961	NaN	0.540947	0.207338	8.46241e-13	-0.0669381	0.000260111	-0.209636
ENSMUSG00000036087:72974531-72974846:target	Slain2	ENSMUSG00000036087	1C	72958286-72974531	1	-1	0	0			0.159051	-0.00429775	0.192094	0.377222	0.391044	-0.48684	0.0155904	-0.0775772
ENSMUSG00000041476:157752172-157752591:target	Smpx	ENSMUSG00000041476	1C	157721079-157752172	1	-1	0	0	GO:0031430~M band;GO:0043292~contractile fiber	GOTERM_CC_DIRECT;GOTERM_CC_DIRECT	0.182082	0.0624979	0.0220317	0.301584	NaN	-0.284586	0.0899873	NaN
ENSMUSG00000025006:40382521-40382633:target	Sorbs1	ENSMUSG00000025006	1C	40373617-40382521	1	0	0	-1			0.182669	0.000454822	NaN	0.353207	0.457888	-0.0362119	-0.000404078	-0.202886
ENSMUSG00000031626:45772354-45772708:target	Sorbs2	ENSMUSG00000031626	1C	45769895-45772534	1	0	0	-1			0.186114	-0.00446587	NaN	0.16162	0.211096	0.00401099	0.081599	-0.145983
ENSMUSG00000002342:70172356-70172561:source	Tmem161a	ENSMUSG00000002342	1C	70172440-70176845	1	-1	0	0			0.366595	-0.000441828	0.101712	0.0357756	0.16488	-0.121381	0.000638903	-0.00919406
ENSMUSG00000019787:33363977-33364022:target	Trdn	ENSMUSG00000019787	1C	33337539-33363978	1	-1	0	0			0.066218	0.342523	-0.138	0.108141	NaN	-0.320425	0.0143581	NaN
ENSMUSG00000019787:33337513-33337543:source	Trdn	ENSMUSG00000019787	1C	33337539-33363978	1	-1	0	0			0.0111488	0.186402	-0.0798466	0.103191	NaN	-0.246152	0.0242271	NaN
ENSMUSG00000043940:101882423-101882650:target	Wdfy3	ENSMUSG00000043940	1C	101876009-101882423	1	0	1	0			0.234748	NaN	NaN	0.0458177	0.115427	0.0388856	0.274063	0.00372807
ENSMUSG00000045962:119929826-119929867:source	Wnk1	ENSMUSG00000045962	1C	119929867-119934256	1	0	0	-1			0.243183	-0.134911	0.069502	0.158055	NaN	-0.0152027	-0.000843514	-0.564814
ENSMUSG00000001211:78287847-78288073:source	Agpat3	ENSMUSG00000001211	2	78288073-78329276	-1	0	-1	-1			0.00885497	-0.251393	0.0108297	-0.00165201	-0.14729	-0.0684929	-0.1361	-0.380849
ENSMUSG00000069833:9000676-9000863:source	Ahnak	ENSMUSG00000069833	2	9000863-9037159	-1	0	1	1	GO:0042383~sarcolemma	GOTERM_CC_DIRECT	-0.134949	0.0857672	-0.0533788	-0.152175	0.000644138	-1.74979e-08	0.197798	0.355051
ENSMUSG00000022892:85030228-85030365:source	App	ENSMUSG00000022892	2	85030365-85040251	-1	1	1	0			-0.0142419	-0.0212671	-0.322708	-0.280429	-0.38811	0.112261	0.117387	-0.0908999
ENSMUSG00000030279:143029160-143029246:target	C2cd5	ENSMUSG00000030279	2	143020374-143029160	-1	1	0	-1			-0.222271	NaN	NaN	-0.0778599	-0.299518	0.190921	NaN	-0.382625
ENSMUSG00000030279:143017883-143018073:source	C2cd5	ENSMUSG00000030279	2	143018073-143019328	-1	1	0	-1			-0.145204	NaN	NaN	-0.28226	-0.397853	0.173582	NaN	-0.278699
ENSMUSG00000002546:32298600-32298638:target	Golga2	ENSMUSG00000002546	2	32297577-32298600	-1	0	-1	-1			4.83003e-05	0.0233663	-0.156602	-0.0790587	-0.244741	-0.0355253	-0.132263	-0.13801
ENSMUSG00000042099:33819780-33819996:target	Kank3	ENSMUSG00000042099	2	33819779-33819780	-1	0	-1	-1			-0.00394331	-0.255023	-0.00642476	-0.00235487	-0.121541	-0.00970414	-0.123338	-0.156948
ENSMUSG00000021843:47705655-47705800:target	Ktn1	ENSMUSG00000021843	2	47704488-47705763	-1	1	0	-1			-0.504014	NaN	-0.28372	-0.176784	-0.167792	0.210386	-0.0061322	-0.161246
ENSMUSG00000033060:101917556-101917656:target	Lmo7	ENSMUSG00000033060	2	101914337-101917631	-1	0	1	1			-0.00583759	-0.0332603	-0.161929	-0.131443	0.0952238	-0.0160654	0.229118	0.74039
ENSMUSG00000033060:101914277-101914337:source	Lmo7	ENSMUSG00000033060	2	101914337-101917631	-1	0	1	1			-0.00875913	-0.298274	-0.0181667	-0.128901	0.0683149	-0.0401352	0.279208	0.721865
ENSMUSG00000038244:112331839-112332039:source	Mical2	ENSMUSG00000038244	2	112332039-112346722	-1	1	1	-1			-0.16501	0.0997559	0.0163198	-0.0117447	-0.112089	0.135947	0.139544	-0.147216
ENSMUSG00000061315:128046152-128046253:target	Naca	ENSMUSG00000061315	2	128045086-128046168	-1	0	1	1			0.144255	0.220257	-0.314124	-0.22181	7.77156e-16	0.0836667	0.240515	0.464477
ENSMUSG00000040374:5560188-5561764:source	Pex2	ENSMUSG00000040374	2	5561764-5562669	-1	0	-1	-1			-0.189156	0.0149371	0.0120474	0.00419606	-0.10136	0.0439212	-0.142327	-0.173344
ENSMUSG00000038502:44863379-44863477:target	Ptov1	ENSMUSG00000038502	2	44863194-44863379	-1	-1	-1	1			-0.0198305	-0.103133	-0.178181	-0.159627	-0.112338	-0.234563	-0.191927	0.224821
ENSMUSG00000031626:45811580-45811774:source	Sorbs2	ENSMUSG00000031626	2	45811774-45814714	-1	1	1	1			-0.702126	NaN	NaN	-0.233348	-5.4628e-05	0.84306	0.333403	0.806979
ENSMUSG00000031626:45814714-45814724:target	Sorbs2	ENSMUSG00000031626	2	45811774-45814714	-1	0	1	1			-0.638378	NaN	NaN	-0.232324	-2.95197e-05	NaN	0.251639	0.79786
ENSMUSG00000031367:163932133-163933666:target	Ap1s2	ENSMUSG00000031367	2	163917843-163932133	1	-1	-1	-1			0.130132	0.00187994	0.55982	0.235609	-1.10348e-09	-0.234207	-0.162573	-0.247546
ENSMUSG00000022892:85056324-85056550:target	App	ENSMUSG00000022892	2	85030365-85056324	1	-1	0	1			0.0232737	0.0180077	0.139557	0.164934	0.119235	-0.211832	-0.00544672	0.158073
ENSMUSG00000021898:26900423-26900846:target	Asb14	ENSMUSG00000021898	2	26897804-26900423	1	-1	-1	0			0.313837	NaN	0.00162777	0.173728	NaN	-0.326947	-0.191796	NaN
ENSMUSG00000023175:79708697-79709044:source	Bsg	ENSMUSG00000023175	2	79709044-79709671	1	0	1	1			0.394495	NaN	NaN	0.204146	0.210742	NaN	0.149245	0.14519
ENSMUSG00000056999:37288098-37288208:source	Ide	ENSMUSG00000056999	2	37288208-37290670	1	-1	-1	-1			0.430128	NaN	0.0160139	0.156947	8.83853e-06	-0.31974	-0.107834	-0.205025
ENSMUSG00000021843:47704187-47704277:source	Ktn1	ENSMUSG00000021843	2	47704277-47705763	1	-1	0	1			0.15745	-0.126417	0.298392	0.171396	0.208512	-0.157886	0.0180223	0.169806
ENSMUSG00000033060:101886937-101888200:target	Lmo7	ENSMUSG00000033060	2	101885572-101886937	1	0	1	1			0.0012909	0.323748	NaN	0.156065	0.000390245	0.0874935	0.129949	0.239134
ENSMUSG00000028863:125107976-125108356:target	Meaf6	ENSMUSG00000028863	2	125103031-125108323	1	-1	1	1			0.298251	NaN	NaN	-0.0390013	0.221208	-0.462072	0.472909	0.217204
ENSMUSG00000051586:120952375-120952485:source	Mical3	ENSMUSG00000051586	2	120952485-120957699	1	1	1	1			0.162232	0.0100665	NaN	0.211917	0.627476	0.124499	0.194916	0.363233
ENSMUSG00000051586:120957699-120957829:target	Mical3	ENSMUSG00000051586	2	120952485-120957699	1	0	1	1			0.340341	-0.00505681	NaN	0.215928	0.642254	0.00191741	0.106397	0.363392
ENSMUSG00000001911:84726469-84726605:target	Nfix	ENSMUSG00000001911	2	84723850-84726469	1	-1	-1	0			0.178701	NaN	0.00708573	0.161167	0.115256	-0.212715	-0.210517	-0.0476355
ENSMUSG00000001911:84721643-84721818:source	Nfix	ENSMUSG00000001911	2	84721818-84723728	1	-1	-1	0			0.217941	NaN	0.0133196	0.154656	0.0447869	-0.207775	-0.136055	-0.0309694
ENSMUSG00000022568:76047621-76047688:source	Scrib	ENSMUSG00000022568	2	76047672-76048115	1	0	-1	-1			0.101835	NaN	NaN	0.233131	0.000300128	0.0497316	-0.185946	-0.273514
ENSMUSG00000026414:135845545-135845656:target	Tnnt2	ENSMUSG00000026414	2	135843814-135845555	1	-1	0	1	GO:0030049~muscle filament sliding	GOTERM_BP_DIRECT	0.552897	0.529758	NaN	0.101525	2.72546e-11	-0.624908	-0.0114687	0.659229
ENSMUSG00000028464:43518390-43518464:source	Tpm2	ENSMUSG00000028464	2	43518464-43518644	1	-1	1	1	mmu04260:Cardiac muscle contraction;GO:0006936~muscle contraction	KEGG_PATHWAY;GOTERM_BP_DIRECT	0.453166	0.0238552	7.77154e-16	-3.71214e-14	0.245775	-0.483289	0.183311	0.448273
ENSMUSG00000028464:43519227-43519297:target	Tpm2	ENSMUSG00000028464	2	43518719-43519227	1	-1	0	1	mmu04260:Cardiac muscle contraction;GO:0006936~muscle contraction	KEGG_PATHWAY;GOTERM_BP_DIRECT	0.466108	-0.0111638	-4.84315e-12	-1.28606e-05	0.235634	-0.417331	0.0685173	0.485786
ENSMUSG00000028464:43518230-43518299:target	Tpm2	ENSMUSG00000028464	2	43516003-43518230	1	-1	0	1	mmu04260:Cardiac muscle contraction;GO:0006936~muscle contraction	KEGG_PATHWAY;GOTERM_BP_DIRECT	0.463483	-0.00523373	-1.97943e-06	-0.00263667	0.263083	-0.463955	0.0275637	0.798699
ENSMUSG00000028464:43514711-43515038:source	Tpm2	ENSMUSG00000028464	2	43515038-43515039	1	-1	0	1	mmu04260:Cardiac muscle contraction;GO:0006936~muscle contraction	KEGG_PATHWAY;GOTERM_BP_DIRECT	0.250102	-0.0419675	-0.0187262	-0.0359077	0.233902	-0.596866	0.0286762	0.612224
ENSMUSG00000028464:43515058-43516004:source	Tpm2	ENSMUSG00000028464	2	43516003-43518230	1	0	1	1	mmu04260:Cardiac muscle contraction;GO:0006936~muscle contraction	KEGG_PATHWAY;GOTERM_BP_DIRECT	0.298613	NaN	6.92133e-16	7.77156e-16	0.103536	NaN	0.376236	0.156156
ENSMUSG00000025871:54565182-54565435:target	4833439L19Rik	ENSMUSG00000025871	3	54564621-54565182	-1	-1	1	-1			-0.259989	NaN	0.0104086	-0.00147219	-0.181579	-0.259064	0.244531	-0.414857
ENSMUSG00000028041:89340055-89340352:source	Adam15	ENSMUSG00000028041	3	89340179-89341508	-1	0	1	-1			0.00961042	-0.045979	-0.415458	-0.399777	-0.639821	-0.00898623	0.238654	-0.19345
ENSMUSG00000028041:89341508-89341577:target	Adam15	ENSMUSG00000028041	3	89340179-89341508	-1	0	1	-1			0.00240028	-0.00142089	-0.266168	-0.372964	-0.577369	0.0119886	0.165904	-0.150502
ENSMUSG00000040407:4043899-4044070:source	Akap9	ENSMUSG00000040407	3	4044070-4044799	-1	-1	0	0			-0.519209	NaN	NaN	-0.136439	-0.012153	-0.104233	0.0390603	0.000610596
ENSMUSG00000022892:85043576-85043743:target	App	ENSMUSG00000022892	3	85040307-85043576	-1	0	1	0			-0.0255468	-0.106929	-0.100455	-0.218789	-0.350058	0.0691715	0.153944	0.00256145
ENSMUSG00000033389:65008063-65008440:target	Arhgap44	ENSMUSG00000033389	3	65005505-65008063	-1	0	0	-1			-0.405359	NaN	NaN	-0.120055	-0.000947174	0.0222915	-1.62927e-05	-0.123538
ENSMUSG00000020792:116300266-116300433:target	Exoc7	ENSMUSG00000020792	3	116295689-116300266	-1	0	1	-1			-0.138398	NaN	0.0407214	-0.000882389	-0.106474	-0.0415836	0.249236	-0.187903
ENSMUSG00000020792:116295544-116295689:source	Exoc7	ENSMUSG00000020792	3	116295689-116300266	-1	0	0	-1			-0.14049	NaN	0.0342979	-0.00495149	-0.152047	-0.022109	0.0670913	-0.174216
ENSMUSG00000075415:31053235-31054218:target	Fnbp1	ENSMUSG00000075415	3	31053167-31054024	-1	-1	0	-1			-0.219182	NaN	NaN	-0.0896721	-0.3236	-0.220372	0.00130357	-0.202129
ENSMUSG00000032737:101823893-101824559:target	Inppl1	ENSMUSG00000032737	3	101823403-101823893	-1	0	1	0			0.000408544	NaN	-0.122442	-0.167699	-0.128902	0.00939402	0.358552	-0.0600132
ENSMUSG00000031805:71680640-71680797:source	Jak3	ENSMUSG00000031805	3	71680797-71680798	-1	0	1	0			-0.14681	NaN	NaN	-0.118882	3.1525e-05	NaN	0.233615	0.00883504
ENSMUSG00000019907:108252757-108252924:source	Ppp1r12a	ENSMUSG00000019907	3	108252924-108253325	-1	-1	0	0			-0.592546	NaN	NaN	-0.259326	-0.204303	-0.309073	0.0790375	-0.0737402
ENSMUSG00000034940:84040797-84044578:target	Synrg	ENSMUSG00000034940	3	84039321-84040797	-1	-1	0	-1			-0.182578	NaN	0.00456498	-0.00467439	-0.24617	-0.445621	0.00080359	-0.430237
ENSMUSG00000032366:67048124-67048249:source	Tpm1	ENSMUSG00000032366	3	67048249-67049019	-1	0	0	-1			-0.129229	0.00652227	0.484902	-0.0120139	-0.215424	0.073859	-0.0925635	-0.146218
ENSMUSG00000083844:5783892-5784710:target	2210015D19Rik	ENSMUSG00000083844	3	5782278-5783892	1	0	0	1			0.000743109	0.448936	0.0542903	-0.00082183	0.119169	-0.00928547	0.00042261	0.198671
ENSMUSG00000025871:54564185-54564272:source	4833439L19Rik	ENSMUSG00000025871	3	54564272-54565182	1	1	0	1			0.555398	NaN	NaN	0.00231636	0.102715	0.282675	-0.0307332	0.220197
ENSMUSG00000024299:33538264-33538410:target	Adamts10	ENSMUSG00000024299	3	33538173-33538264	1	0	-1	1			0.112211	NaN	NaN	-0.00719525	0.166194	-0.0412463	-0.132053	0.116293
ENSMUSG00000024299:33538068-33538173:source	Adamts10	ENSMUSG00000024299	3	33538173-33538264	1	0	-1	0			0.178802	NaN	NaN	0.000311215	0.21249	0.00946666	-0.1349	0.0250934
ENSMUSG00000055013:89609496-89609599:source	Agap1	ENSMUSG00000055013	3	89609583-89610284	1	1	0	1			0.157475	NaN	NaN	0.25636	0.0921709	0.203471	-0.0158106	0.203057
ENSMUSG00000069601:69904198-69904270:source	Ank3	ENSMUSG00000069601	3	69904270-69927695	1	1	0	1			0.178252	NaN	NaN	-0.0102185	0.182195	0.186541	0.0427926	0.172946
ENSMUSG00000022892:84965670-84965770:source	App	ENSMUSG00000022892	3	84965770-84978064	1	1	0	0			-0.0738668	-0.375427	0.566647	0.103711	0.115171	0.405867	-0.00949016	-0.0484311
ENSMUSG00000022892:84978064-84978285:target	App	ENSMUSG00000022892	3	84965770-84978064	1	1	0	0			-0.0915674	-0.175567	0.410825	0.108698	0.108454	0.402465	-0.00657628	-0.0597098
ENSMUSG00000031133:57244605-57244750:target	Arhgef6	ENSMUSG00000031133	3	57243515-57244605	1	0	-1	0			0.234812	0.0337397	NaN	0.246983	NaN	0.0493426	-0.142506	NaN
ENSMUSG00000031231:106017598-106017709:target	Cox7b	ENSMUSG00000031231	3	106015870-106017598	1	0	0	1			0.265706	NaN	NaN	0.00977047	0.210277	0.0104761	0.0572548	0.138945
ENSMUSG00000032737:101822632-101823421:source	Inppl1	ENSMUSG00000032737	3	101823403-101823513	1	0	-1	0			0.00355121	-0.763504	0.327695	0.155255	0.116526	-0.0018158	-0.286028	0.0419112
ENSMUSG00000020863:94292394-94292472:source	Luc7l3	ENSMUSG00000020863	3	94292472-94292927	1	1	0	1			0.0110553	0.0146611	0.502575	0.120554	0.0015766	0.301819	-7.02489e-05	0.14492
ENSMUSG00000028649:123440550-123440791:source	Macf1	ENSMUSG00000028649	3	123440791-123444835	1	1	-1	1			0.352852	NaN	NaN	0.00181419	0.214247	0.237898	-0.140523	0.543995
ENSMUSG00000002831:56100591-56102330:source	Plin4	ENSMUSG00000002831	3	56102330-56102409	1	0	-1	1			0.0442831	0.144498	-0.0193151	0.000339489	0.177229	NaN	-0.173454	0.136957
ENSMUSG00000019907:108259756-108259846:target	Ppp1r12a	ENSMUSG00000019907	3	108252924-108259756	1	1	0	0			0.507832	NaN	NaN	0.219224	0.0713626	0.128368	-0.0143957	0.0600862
ENSMUSG00000008658:7407964-7408039:target	Rbfox1	ENSMUSG00000008658	3	7375969-7407964	1	1	0	0			0.0688211	NaN	0.314878	0.18151	NaN	0.102042	-0.0635518	NaN
ENSMUSG00000034940:84039211-84039321:source	Synrg	ENSMUSG00000034940	3	84039321-84039656	1	1	0	1			0.189841	NaN	NaN	0.00439131	0.207332	0.452583	-0.00117666	0.387697
ENSMUSG00000090086:123134463-123134717:target	AI480526	ENSMUSG00000090086	4	123134462-123134463	-1	0	0	0			-0.113686	NaN	NaN	-0.237059	NaN	NaN	0.00318195	NaN
ENSMUSG00000039953:149638233-149638395:source	Clstn1	ENSMUSG00000039953	4	149638395-149641658	-1	0	0	0			-0.186275	NaN	4.83166e-05	-0.453876	-0.815549	0.000774054	-0.000353156	7.7722e-16
ENSMUSG00000033335:21493943-21494617:target	Dnm2	ENSMUSG00000033335	4	21489794-21494504	-1	0	0	0	GO:0035904~aorta development	GOTERM_BP_DIRECT	-0.000380955	0.00674348	-0.124388	-0.0591362	-0.406308	-0.00944398	2.89031e-05	7.20624e-05
ENSMUSG00000039065:31616871-31621227:target	Fam173b	ENSMUSG00000039065	4	31609616-31616871	-1	0	0	0			-0.141986	NaN	NaN	-0.0512195	-0.127129	0.00470066	NaN	-0.000888059
ENSMUSG00000093445:137639578-137639655:source	Lrch4	ENSMUSG00000093445	4	137639655-137639948	-1	0	0	0			-0.392877	NaN	NaN	-0.250457	-0.478945	0.000882762	0.000119221	-0.000741217
ENSMUSG00000028849:126237156-126237278:source	Map7d1	ENSMUSG00000028849	4	126237278-126238522	-1	0	0	0			-0.102306	-0.00833117	-0.112889	-0.0919103	-0.172204	-0.00236625	-0.0938845	0.0462138
ENSMUSG00000041921:71453276-71453398:source	Metap1d	ENSMUSG00000041921	4	71453398-71506785	-1	0	0	0			-0.176635	NaN	NaN	-0.109204	-0.00367442	0.00728416	0.0098561	0.000470406
ENSMUSG00000041921:71515637-71515800:source	Metap1d	ENSMUSG00000041921	4	71515800-71522533	-1	0	0	0			-0.637499	NaN	NaN	-0.141434	0.000536541	0.0156073	-0.000445165	0.00680096
ENSMUSG00000038880:24897214-24897502:target	Mrps34	ENSMUSG00000038880	4	24897140-24897214	-1	0	0	0			-0.479805	NaN	NaN	-8.83574e-05	-0.129044	0.000625918	0.00966238	-0.0291199
ENSMUSG00000000631:77812009-77812719:source	Myo18a	ENSMUSG00000000631	4	77812719-77814634	-1	0	0	0			-0.134513	NaN	NaN	-0.142845	-0.311322	0.0201629	-0.00103123	-3.92077e-06
ENSMUSG00000000631:77857479-77857845:target	Myo18a	ENSMUSG00000000631	4	77854722-77857723	-1	0	0	0			-0.00181512	-0.00262528	-0.106341	-0.420792	-0.588635	-0.000216506	3.73376e-08	1.23797e-06
ENSMUSG00000032067:50524723-50524964:source	Pts	ENSMUSG00000032067	4	50524779-50525262	-1	0	0	0			-0.501366	NaN	NaN	-0.124466	0.000812507	0.00774393	-0.00552307	0.00172347
ENSMUSG00000039844:29719593-29719850:target	Rapgef1	ENSMUSG00000039844	4	29710308-29719593	-1	0	0	0			-0.338598	-0.000157665	-0.539868	-0.141961	NaN	0.00237097	4.93726e-05	NaN
ENSMUSG00000008658:7285478-7285531:source	Rbfox1	ENSMUSG00000008658	4	7285531-7294070	-1	0	0	0			-0.211506	NaN	-0.0266182	-0.123369	NaN	0.0181036	-0.000668804	NaN
ENSMUSG00000008658:7352932-7353064:source	Rbfox1	ENSMUSG00000008658	4	7353064-7369801	-1	0	0	0			0.00171209	NaN	-0.405455	-0.324521	NaN	NaN	-0.0243043	NaN
ENSMUSG00000008658:7375905-7375969:source	Rbfox1	ENSMUSG00000008658	4	7375969-7391988	-1	0	0	0			-0.151418	NaN	-0.0911774	-0.119409	NaN	-0.0526723	0.00885219	NaN
ENSMUSG00000052852:71780722-71780835:source	Reep1	ENSMUSG00000052852	4	71780835-71788048	-1	0	0	0			-0.327647	NaN	NaN	-0.365352	NaN	0.00678995	NaN	NaN
ENSMUSG00000038371:110348855-110348995:target	Sbf2	ENSMUSG00000038371	4	110340074-110348855	-1	0	0	0			-0.376344	NaN	NaN	-0.117171	-0.000464269	0.0891662	0.00410271	-0.000130803
ENSMUSG00000027366:126913532-126913588:target	Sppl2a	ENSMUSG00000027366	4	126913353-126913532	-1	0	0	0			-0.00348913	-0.198557	-0.00750253	-0.0860905	-0.133415	0.0241884	-0.0338636	-0.0328502
ENSMUSG00000027366:126912643-126912747:source	Sppl2a	ENSMUSG00000027366	4	126912745-126913300	-1	0	0	0			-0.284037	-0.234808	-0.0203939	-0.0908452	-0.143103	-0.0190755	-0.046916	-0.0319054
ENSMUSG00000057738:30001884-30002438:target	Sptan1	ENSMUSG00000057738	4	30000062-30002231	-1	0	0	0			-0.181646	-0.25743	NaN	-0.209008	-0.0851955	0.0343456	0.033881	0.0706334
ENSMUSG00000019787:33195949-33196125:source	Trdn	ENSMUSG00000019787	4	33196125-33200163	-1	0	0	0			-0.0132724	0.00841145	-0.41116	-0.501155	NaN	0.00212069	0.01078	NaN
ENSMUSG00000040407:4045898-4046941:target	Akap9	ENSMUSG00000040407	4	4044070-4045898	1	0	0	0			0.274877	NaN	NaN	0.108346	0.00770552	0.0264264	-0.0215938	-0.000570172
ENSMUSG00000030766:123279150-123280116:source	Arhgap17	ENSMUSG00000030766	4	123280116-123285420	1	0	0	0			0.429892	NaN	NaN	0.165915	0.301696	NaN	0.0449964	0.00162911
ENSMUSG00000014668:110146470-110146745:target	Chfr	ENSMUSG00000014668	4	110144650-110146470	1	0	0	0			0.311755	NaN	NaN	0.133324	0.000192114	0.000278435	-0.000296724	0.00182651
ENSMUSG00000068663:10611003-10611135:target	Clec16a	ENSMUSG00000068663	4	10596033-10611003	1	0	0	0			0.296419	NaN	NaN	0.125209	0.173914	0.0682036	0.0174279	-0.00479076
ENSMUSG00000039953:149643195-149643352:target	Clstn1	ENSMUSG00000039953	4	149638395-149643195	1	0	0	0			0.200937	0.0041752	NaN	0.486092	0.816832	-0.000177251	0.00109745	7.77063e-16
ENSMUSG00000022789:16319452-16319508:target	Dnm1l	ENSMUSG00000022789	4	16318477-16319452	1	0	0	0			0.130673	NaN	NaN	0.26594	0.279436	-0.0928264	0.0361457	-0.0638347
ENSMUSG00000022556:76500131-76500196:target	Hsf1	ENSMUSG00000022556	4	76500053-76500131	1	0	0	0			0.360874	NaN	NaN	0.0230155	0.127946	NaN	-0.0003115	0.0098046
ENSMUSG00000031805:71682282-71682413:source	Jak3	ENSMUSG00000031805	4	71682413-71682900	1	0	0	0			0.105783	NaN	NaN	0.329972	0.237704	-0.00699596	0.0244651	-0.0481608
ENSMUSG00000036333:25061218-25061278:target	Kidins220	ENSMUSG00000036333	4	25054034-25061218	1	0	0	0			0.208462	NaN	NaN	0.342387	NaN	0.0005222	-3.88496e-06	NaN
ENSMUSG00000022629:90965467-90965632:target	Kif21a	ENSMUSG00000022629	4	90959748-90965467	1	0	0	0			0.531259	NaN	NaN	0.492193	0.724471	-0.0750644	0.0581817	-0.0375337
ENSMUSG00000022629:90959688-90959748:source	Kif21a	ENSMUSG00000022629	4	90959748-90965467	1	0	0	0			0.556293	NaN	NaN	0.488854	0.697955	-0.086432	0.0394734	-0.0514948
ENSMUSG00000090077:181382616-181382703:source	Lime1	ENSMUSG00000090077	4	181382703-181382799	1	0	0	0			0.224168	NaN	NaN	0.00519817	0.167817	NaN	0.000136867	0.0796795
ENSMUSG00000093445:137640765-137641099:target	Lrch4	ENSMUSG00000093445	4	137639655-137640765	1	0	0	0			0.228131	0.100755	0.00521027	0.208611	0.38746	0.0098966	-0.000220007	7.87815e-05
ENSMUSG00000018411:104310269-104310930:target	Mapt	ENSMUSG00000018411	4	104306758-104310269	1	0	0	0			0.272014	NaN	NaN	0.170667	NaN	NaN	0.00521673	NaN
ENSMUSG00000018736:68821434-68822665:source	Ndel1	ENSMUSG00000018736	4	68822665-68829915	1	0	0	0			0.198594	0.0633541	0.288057	-0.0280193	0.254766	0.00139677	0.0747283	-0.0276062
ENSMUSG00000026950:52151364-52151456:source	Neb	ENSMUSG00000026950	4	52151456-52153056	1	0	0	0			NaN	NaN	0.105586	0.197601	NaN	NaN	NaN	NaN
ENSMUSG00000009073:4765845-4768273:source	Nf2	ENSMUSG00000009073	4	4768273-4782187	1	0	0	0			-2.31715e-05	NaN	0.121804	0.272954	0.637475	-0.0637216	0.0548983	0.000123564
ENSMUSG00000073435:24897214-24897522:target	Nme3	ENSMUSG00000073435	4	24897213-24897214	1	0	0	0			0.53629	NaN	NaN	8.95064e-05	0.125405	-0.000377523	-0.00942561	0.0345212
ENSMUSG00000019907:108253325-108253495:target	Ppp1r12a	ENSMUSG00000019907	4	108251944-108253325	1	0	0	0			0.181735	NaN	NaN	0.183761	0.305654	0.0326097	-0.0869437	-0.0329222
ENSMUSG00000039126:17220784-17223932:target	Prune2	ENSMUSG00000039126	4	17208329-17220784	1	0	0	0			0.260611	NaN	NaN	0.272678	0.386114	0.0166351	4.86626e-05	-0.0104001
ENSMUSG00000038371:110339184-110340285:source	Sbf2	ENSMUSG00000038371	4	110340074-110341290	1	0	0	0			0.491459	NaN	NaN	0.119579	4.95863e-06	-0.0763887	-0.00406298	0.00273048
ENSMUSG00000029146:31194796-31194913:target	Snx17	ENSMUSG00000029146	4	31193943-31194796	1	0	0	0			0.0508047	0.171305	0.000718755	0.154797	0.0769822	-0.0697273	0.00376253	-0.0584761
ENSMUSG00000057738:29999914-30000062:source	Sptan1	ENSMUSG00000057738	4	30000062-30001100	1	0	0	0			0.189931	0.242068	NaN	0.192854	0.0570333	-0.0342686	-0.0714124	-0.0722758
ENSMUSG00000030987:102430885-102431275:target	Stim1	ENSMUSG00000030987	4	102427317-102430885	1	0	0	0			NaN	NaN	0.231708	0.191432	0.333559	NaN	0.042546	0.0780473
ENSMUSG00000027522:174091465-174091622:source	Stx16	ENSMUSG00000027522	4	174091622-174093434	1	0	0	0			0.020722	NaN	0.180068	0.00495435	0.133061	0.000980694	-0.00913415	0.00472707
ENSMUSG00000027582:181382616-181382703:source	Zgpat	ENSMUSG00000027582	4	181382703-181382799	1	0	0	0			0.198146	NaN	NaN	0.00587779	0.120352	NaN	-0.000451499	0.0377521
