# Supplementary material for: Ancient antagonism between CELF and RBFOX families tunes mRNA splicing outcomes
Source: HighWire-hosted journal article supplement (doi:10.1101/gr.220517.117), 2017-05-16
Supplement: Supplemental_Table_S4.xlsx [file Supplemental_Table_S4.xlsx]

## Sheet: LEGEND
Supplemental Table S4: List of forward and reverse primers utilized for RT-PCR in this study along with predicted product sizes

## Sheet: RT-PCR primers
#Name	Forward Primer	Reverse Primer	Inclusion Product Size(s)	Exclusion Product Size	isPCR coordinate bounds (hg19)	LSV(s)	Type	Event notes
MAP2K7	CGACCTCAACCTGGATATCAGCC	GGAGCTCTCTGAGGATGGCGAGC	150	100	chr19:7,968,913-7,974,698	ENSG00000076984:7968728-7968953:source|ENSG00000076984:7974640-7974781:target	CuFd
EPB41	TGTCGATTCGGCAGACCGAAGTCC	CCATTCACTAGGCCGTGGTTCTGG	370	307	chr1:29,379,623-29,391,598	ENSG00000159023:29379616-29379824:source	CuFd
PPFIBP1	TCCGGCAGAAAGCAGGCCATTTGG	ACCAGCCAGATCTAGGTGCTCTGC	241	208	chr12:27,829,369-27,832,465	ENSG00000110841:27829361-27829532:source	CuFd
CTTN	CGCCGTTGGCTTTGAGTATCAAGGC	CTTATCCATCCGATCCTTCTGCACC	331	220	chr11:70,265,910-70,269,101	ENSG00000085733:70266492-70266616:source|ENSG00000085733:70269046-70269101:target	CuFd
PTK2B	CAGATGGAGAAGGACATTGCCATGG	CACTGGTAGTCCTCCACCATCTGC	413	287	chr8:27,300,402-27,308,387	ENSG00000120899:27308266-27308412:target|ENSG00000120899:27301723-27301788:source	CudFd
ABI1	CTCAGCTCCTGGTTCCCAGTATGG	TGGCGGTGGAGTTGGACTATCAGC	280	193	chr10:27,040,687-27,048,157	ENSG00000136754:27047991-27048167:target|ENSG00000136754:27040527-27040712:source	CudFd
MYL6	GAAGTAGAGATGCTGGTGGCAGGG	ACACAGGGAAAGGCACGGACTCTGG	182	137	chr12:56,554,047-56,555,241	ENSG00000092841:56554027-56554127:source|ENSG00000092841:56555171-56555371:target	CudFd
MYO9B	AGTATCGCCTTCCGCAGGCTTTCG	CTCCTCCTTGATGGACTGGATCCG	222	174	chr19:17,320,477-17,321,655	ENSG00000099331:17321252-17321661:target|ENSG00000099331:17320395-17320518:source	CudFd
NF2	AGAGCAAGCATCTGCAGGAGCAGC	AGAGCTCTTCAAAGAAGGCCACTCG	255/240	195	chr22:30,077,445-30,090,789	ENSG00000186575:30090741-30094587:target|ENSG00000186575:30077428-30077590:source	CdFd	Alt exon includes alt 5'ss
MACF1	AGACAAGTGGCTCAGTGCAAATGTGC	ATTCATCCAAGGCCATCCATCCTCC	178	160	chr1:39,929,290-39,934,377	ENSG00000127603:39929284-39930581:source|ENSG00000127603:39934265-39934404:target	CdFd
SLMAP	CCTGAAGCTGCTCCGAGAGAAAGG	CTTCTAGAGGGAGGACGGTGTACG	254	164	chr3:57,908,720-57,913,155	ENSG00000163681:57913023-57914895:target|ENSG00000163681:57908616-57908750:source	CdFd
FLNB	TTCTGACCCCAGATGGCACTGAGG	CAGGCCGTTCATGTCACTCACTGG	272	200	chr3:58,124,102-58,128,421	ENSG00000136068:58128377-58128479:target|ENSG00000136068:58124009-58124256:source	CdFd
CLSTN1	CTCTCTATGTGGATGGCACGTCCC	AAACTGGGTCATGTGCAGGTCGCC	191	134	chr1:9,796,075-9,801,259	ENSG00000171603:9801152-9801314:target	CxFd
NDEL1	CTGTGGGGTGCTGAATGGCAATGG	ACACACTGAGAGGCAGCATACCCG	196	161	chr17:8,363,410-8,370,339	ENSG00000166579:8363327-8363478:source	CxFd
UAP1	ATGGCTCTCGCCTTCCAGCAATTCC	CCAGCTCATGAACTCCATTCTCATCG	222/219	171	chr1:162,560,274-162,569,136	ENSG00000117143:162560113-162560301:source	CxFd	Alt exon includes NAGNAG 3'ss
KIF21A	GTCTTCAGGCTGCCCAGAAAGAGG	TCCTGGGCTGTTTAAAGGAGCATCC	236	215	chr12:39,720,077-39,724,712	ENSG00000139116:39724548-39724713:target	CxFd
FAM188A	GACCACTCTGGATCATACTGCTTGG	CCCACATTGAATACTGGTCCAAGACAGC	229	177	chr10:15,879,253-15,883,536	ENSG00000148481:15879203-15879317:source|ENSG00000148481:15883425-15883598:target	CuFx
CLASP1	TGATGTGAACGCAGCAGCCAGTGC	TCCCAGAGCTTTGCCGTCTTGTGC	188	140	chr2:122,187,721-122,205,019	ENSG00000074054:122187649-122187753:source|ENSG00000074054:122204913-122205083:target	CuFx
NF1	GCCTTGAGGAAAACCAGCGGAACC	TGGCACTTCCTACTGCACCGATGC	234	171	chr17:29,576,019-29,585,413	ENSG00000196712:29585362-29585520:target|ENSG00000196712:29576002-29576137:source	CuFx
MPZL1	GTGGTGGGCATAGTTACTGCTGTGG	TTGTCCTTGCCTGGGTCTCCAAGG	417	314	chr1:167,742,502-167,757,266	ENSG00000197965:167757057-167761156:target|ENSG00000197965:167742473-167743146:source	CuFx
