# Supplementary material for: Ancient antagonism between CELF and RBFOX families tunes mRNA splicing outcomes
Source: HighWire-hosted journal article supplement (doi:10.1101/gr.220517.117), 2017-05-16
Supplement: Supplemental_Table_S5.xlsx [file Supplemental_Table_S5.xlsx]

## Sheet: LEGEND
Supplementary Table S5: Summary of samples used and accession numbers for RNA-seq data utilized in this study.

## Sheet: RNA-seq accessions
Supplemental Table S5: Summary of samples used and accession numbers for RNA-seq data utilized in this study.
Comparison	Sample Accessions used	Dataset Accession	PMID
Human
CELF2 KD in unstimulated JLS1 cells	SRX2489605-SRX2489606,SRX2489609-SRX2489610	GEO accession number pending	This study
CELF2 KD in stimulated JLS1 cells	SRX2489607-SRX2489608,SRX2489611-SRX2489612	GEO accession number pending	This study
DM1 heart	SRR1971626-SRR1971631	GSE67812	27063795
Mouse
CELF1 OE heart	SRR1205699-SRR1205701,SRR1205714-SRR1205718	GSE56185	24752171
CELF2 OE heart	SRR1593043-SRR1593048	GSE61893	25883322
CELF1 OE muscle	SRR1593024-SRR1593029	GSE61893	25883322
Rbfox2 KD myotubes (differentiated C2C12)	SRR1501302-SRR1501307	GSE58928	25087874
Rbfox2 KD myotblasts (undifferentiated C2C12)	SRR1501308-SRR1501310	GSE58928	25087874
Rbfox2 KO heart (RASL-seq)	SRR1297239-SRR1297251	GSE57926	25753418
Rbm24 KO heart	SRR1508216-SRR1508218,SRR1508225-SRR1508227	n/a	25313962
Srsf10 KO heart	SRR1917052,SRR1917053	GSE66965	26586428
hnRNP U KO heart	SRR1986952-SRR1986955	GSE68178	26039991
Mbnl1 KO heart	SRR533622-SRR533633	GSE39911	22901804
Heart development	SRR964790-SRR964794	GSE49906	24752171
myogenesis (C2C12 differentiation)	SRR1501308,SRR1501302-SRR1501303	GSE58928	25087874
T1D heart	SRR3499912-SRR3499916	GSE80664	27239029
Chicken
CELF1 KD in cultured primary embryonic cardiomyocytes	SRR1944461-SRR1944475	GSE67360	26866591
Drosophila melanogaster
aretIR (Bruno1) in indirect flight muscles 30hAPF	SRR1665023-SRR1665028,SRR1665036-SRR1665042	GSE63707	25532219
C. elegans
UNC-75 null mutant (e950) from N2 whole worm	n/a	SRX514835	24910101
