# Supplementary material for: Ancient antagonism between CELF and RBFOX families tunes mRNA splicing outcomes
Source: HighWire-hosted journal article supplement (doi:10.1101/gr.220517.117), 2017-05-16
Supplement: Supplemental_Table_S6.xlsx [file Supplemental_Table_S6.xlsx]

## Sheet: LEGEND
Supplemental Table S6: Summary of samples used and accession numbers for CLIP-seq data utilized in this study.

## Sheet: CLIP-seq accessions
RBP	Condition	Run accession numbers	Dataset accession number	PMID
Human
CELF2	JSL1 cells	SRR2057057,SRR2057599,SRR2057600,SRR2057602,SRR2057609,SRR2057620,SRR2057621,SRR2057623,SRR2057624,SRR2057625,SRR2057626,SRR2057627,SRR2057628,SRR2057629,SRR2057630,SRR2057631,SRR2057633	GSE71264	27096301
RBFOX2	HEK293	SRR3147598-SRR3147603	GSE77634	27018577
RBFOX2	H1ES human embryonic stem cells	SRR3187414,SRR3187415	GSE78507	27068461
Various (ENCODE, 160 experiments as of October 2016)	HepG2 and K562	https://www.encodeproject.org/search/?searchTerm=eclip&type=Experiment&files.file_type=bed+narrowPeak&assembly=hg19	https://www.encodeproject.org/	26990993
Mouse
Celf1	C2C12	SRR1593050-SRR1593052	GSE61893	25883322
Celf1	C2C12	ERR039244-ERR039249	E-MTAB-414	22355723
Celf1	heart	SRR1593053-SRR1593054	GSE61893	25883322
Celf1	muscle	SRR1593055-SRR1593056	GSE61893	25883322
Celf2	N2A nueroblastoma	SRR3179956	GSE78111	27253061
Mbnl1	brain	SRR533660,SRR533661	GSE39911	22901804
Mbnl1	C2C12	SRR533665	GSE39911	22901804
Mbnl1	C2C12	ERR039250-ERR039254	E-MTAB-414	22355723
Mbnl1	heart	SRR533662	GSE39911	22901804
Mbnl1	muscle	SRR1553158-SRR1553160	GSE60487	25263597
Mbnl1	muscle	SRR533663	GSE39911	22901804
Ptbp1	C2C12	ERR039255-ERR039256	E-MTAB-414	22355723
Rbfox1	brain	SRR1035719	SRP030031	24213538
Rbfox2	brain	SRR1035720	SRP030031	24213538
Rbfox2	cardiomyocytes	SRR1297227-SRR1297228	GSE57926	25753418
