# Supplementary material for: Ancient antagonism between CELF and RBFOX families tunes mRNA splicing outcomes
Source: HighWire-hosted journal article supplement (doi:10.1101/gr.220517.117), 2017-05-16
Supplement: Supplemental_Table_S7.xlsx [file Supplemental_Table_S7.xlsx]

## Sheet: LEGEND
Supplemental Table S7: Summary of CELF/RBFOX co-regulated exons conserved in mammals and chicken as well as mammalian genes containing CELF/RBFOX co-regulated cassette where the orthologous gene in chicken, fly, or worm also contains a putative co-regulated event.

## Sheet: chicken_mammal_conserved_peptid
#Gene	chicken alt. exon coords (ggal4)	mammalian alt. eoxn coords (mm10 or hg19)	chicken_exon_len	mammalian_exon_len	chicken_aa	mammalian_aa	chicken_LSV1	chicken_LSV2	mammalian_LSV1	mammalian_LSV2	mammal	CELF_regulation
AKAP2	chrZ:65,656,627-65,656,665:+	chr4:57886289-57886327:+	39	39	YTCKLLSSKVTSE	YTSKLLSCKVTSE	ENSGALG00000015656:65654251-65654429:source	ENSGALG00000015656:65660745-65663759:target	ENSMUSG00000038729:57883024-57883202:source	ENSMUSG00000038729:57892869-57896984:target	mouse	rep
AP1B1	chr15:11137234-11137254:+	chr11:5033242-5033262	21	21	MGDESEG	MGDESEG	ENSGALG00000008138:11136559-11136760:source	ENSGALG00000008138:11137647-11137676:target	ENSMUSG00000009090:5032418-5032868:source	ENSMUSG00000009090:5033687-5033842:target	mouse	rep
ASPH	chr2:113065815-113065859:-	chr4:9637659-9637703:-	45	45	(A)KAKDFRYNLSEVLQ(G)	(A)KAKDFRYNLSEVLQ(G)	ENSGALG00000015479:113066726-113066875:target	ENSGALG00000015479:113064211-113064279:source	ENSMUSG00000028207:9639197-9639348:target	ENSMUSG00000028207:9633116-9635969:source	mouse	enh
ATP2B1	chr1:43280874-43280960:-	chr10:99019278-99019364:+	87	87	MDVVNAFQSGSTIQGALRRQPSIASQHHD	MDVVNAFQSGSSIQGALRRQPSIASQHHD	ENSGALG00000011258:43281285-43281467:target	ENSGALG00000011258:43273706-43276653:source	ENSMUSG00000019943:99018715-99018897:source	ENSMUSG00000019943:99022666-99026143:target	mouse	rep
CAMK2A	chr13:12528180-12528212:+	chr18:60969011-60969043:+	33	33	KRKSSSSVQLM	KRKSSSSVQLM	ENSGALG00000005621:12524921-12524961:source	ENSGALG00000005621:12529283-12529331:target	ENSMUSG00000024617:60963554-60963963:source	ENSMUSG00000024617:60969994-60970042:target	mouse	rep
CLASP1	chr7:25615679-25615774:-	chr1:118555285-118555386:+	96	102	TMHSWVGEDLPARTTTASSGPGEGNLEEKCKQ	SQRQRSRAGEDVPGRSVPTCSGPGEGSLEESCKQ	ENSGALG00000011645:25621794-25621937:target	ENSGALG00000011645:25611699-25611842:source	ENSMUSG00000064302:118552013-118552156:source	ENSMUSG00000064302:118559986-118560129:target	mouse	rep
DST	chr3:86538187-86538255:+	chr1:34301861-34301932:+	69	72	(V)HHHGSKMLRSESNSSITTQPTI(A)	(V)HHHGSKMLRSESNSSITATQPTL(A)	ENSGALG00000016289:86535950-86536067:source	ENSGALG00000016289:86539036-86539235:target	ENSMUSG00000026131:34299721-34299838:source	ENSMUSG00000026131:34302830-34303032:target	mouse	rep
FERMT2	chr5:58155742-58155762:-	chr14:45462715-45462735:-	21	21	PGYVRDL	PGCVRDL	ENSGALG00000012425:58157749-58157970:target	ENSGALG00000012425:58155135-58155259:source	ENSMUSG00000037712:45464724-45464945:target	ENSMUSG00000037712:45462116-45462240:source	mouse	rep
FEZ2	chr3:31615595-31615675:-	chr17:78386991-78387071:-	81	81	RFSMEGISNVIQNGFRHTFGNSGGEKQ	RFSMEGISNVIQNGLRHTFGNSGGEKQ	ENSGALG00000010594:31618709-31618977:target	ENSGALG00000010594:31610397-31610472:source	ENSMUSG00000056121:78400630-78400898:target	ENSMUSG00000056121:78384743-78384819:source	mouse	rep
GOLGA2	chr17:4999430-4999564:+	chr2:32296626-32296721:+	135	96	AYFDSDVATRNADQLAADVPVLSNSNSLPSCASVLPAPGSTQLTQ	VPTDHIAPAPPTAATDTMFLGVTPSPDADLTG	ENSGALG00000004881:4997194-4997274:source	ENSGALG00000004881:5000152-5000195:target	ENSMUSG00000002546:32293315-32293395:source	ENSMUSG00000002546:32296965-32297008:target	mouse	rep
LRRFIP1	chr7:4641453-4641497:-	chr1:91090455-91090499:+	66	66	PSLLYSNALPARSYR	PFVLCNAAWPTGSYR	ENSGALG00000003862:4642610-4642690:target	ENSGALG00000003862:4640493-4640558:source	ENSMUSG00000026305:91088634-91088762:source	ENSMUSG00000026305:91091602-91091667:target	mouse	enh
MEF2A	chr10:16547260-16547397:+	chr7:67268067-67268204:-	138	138	ALNKKEHRGCDSPDPDTSYVLTPHTEEKYKKINEEFDNMMRNHKIA	ALNKKEHRGCDSPDPDTSYVLTPHTEEKYKKINEEFDNMMRNHKIA	ENSGALG00000007100:16531181-16531384:source	ENSGALG00000007100:16550483-16550702:target	ENSMUSG00000030557:67295375-67295578:target	ENSMUSG00000030557:67265943-67266162:source	mouse	rep
MEF2D	chr25:586393-586413:-	chr3:88161781-88161801:+	21	21	TEDHLAL	TEDHLDL	ENSGALG00000014559:586698-586888:target	ENSGALG00000014559:583687-583816:source	ENSMUSG00000001419:88161191-88161381:source	ENSMUSG00000001419:88162958-88163087:target	mouse	rep
PALLD	chr4:24653475-24653525:+	chr8:61534858-61534908:-	51	51	EVCPTDASVVSPMDIQK	DAGAPRASVGGPLDGQK	ENSGALG00000009650:24652807-24652908:source	ENSGALG00000009650:24655005-24655226:target	ENSMUSG00000058056:61535686-61535784:target	ENSMUSG00000058056:61533354-61533841:source	mouse	rep
PHYKPL	chr13:13619649-13619874:+	chr5:177649356-177649581:-	226	226	(E)HVHKAGGVFVADEIQVGFGRVGKHFWAFQLQGEEFIPDIVTMGKPIGNGHPIACVATTKEIAEAFAATGVEYFNT	(E)HIRKAGGVFVADEIQVGFGRVGKHFWAFQLQGKDFVPDIVTMGKSIGNGHPVACVAATQPVARAFEATGVEYFN(T)	ENSGALG00000023920:13619277-13619359:source	ENSGALG00000023920:13620127-13620281:target	ENSG00000175309:177651617-177652011:target	ENSG00000175309:177649853-177649935:source	human	enh
PPFIBP1	chr1:68427788-68427820:+	chr12:27829997-27830029:+	33	33	(D)RSRSASAPTL(A)	(D)RKRSASAPTL(A)	ENSGALG00000014106:68426147-68426321:source	ENSGALG00000014106:68430025-68430166:target	ENSG00000110841:27829361-27829532:source	ENSG00000110841:27832422-27832572:target	human	rep
PPP1R12A	chr1:39530177-39530293:-	chr10:108248956-108249069:+	117	114	YDFIPPIMPVVESVDPASWRQGLRKTGIVLVPNKGEKAM	FDLIASLMPVESVDPASWRQGLRKTGIVLVPSKGEKSM	ENSGALG00000010325:39533644-39533753:target	ENSGALG00000010325:39529600-39529815:source	ENSMUSG00000019907:108243006-108243130:source	ENSMUSG00000019907:108249435-108249650:target	mouse	rep
PXDN	chr3:92542052-92542123:-	chr2:1691404-1691475:-	72	72	(L)YLYKNEIQSIDRQAFKGLASLEQ(L)	(L)YLYKNEIQSIDRQAFKGLASLEQ(L)	ENSGALG00000016377:92548190-92548261:target	ENSGALG00000016377:92535534-92535605:source	ENSG00000130508:1695700-1695771:target	ENSG00000130508:1687852-1687923:source	human	rep
USP47	chr5:7641724-7641783:-	chr7:112046927-112046986:+	60	60	DMFWSCRQSTLAEMKKKFAQ	DVFWRCRQNIFDEMKKKFLQ	ENSGALG00000005569:7657493-7657569:target	ENSGALG00000005569:7638584-7638787:target	ENSMUSG00000059263:112023506-112023746:source	ENSMUSG00000059263:112053217-112053420:target	mouse	rep

## Sheet: chicken_mammal_genes
mammalian_gene	chicken_gene
AKAP2	ENSGALG00000015656
ANK2	ENSGALG00000012044
AP1B1	ENSGALG00000008138
ARHGAP17	ENSGALG00000005962
ASPH	ENSGALG00000015479
ATP2B	ENSGALG00000011258
CAMK2A	ENSGALG00000005621
CCDC141	ENSGALG00000020788
CLASP1	ENSGALG00000011645
DENND1A	ENSGALG00000001157
DNM1L	ENSGALG00000012929
DST	ENSGALG00000016289
EPS15L1	ENSGALG00000021601
FERMT2	ENSGALG00000012425
FEZ2	ENSGALG00000010594
FHOD3	ENSGALG00000013124
GOLGA2	ENSGALG00000004881
KIAA1109	ENSGALG00000011869
KIF1B	ENSGALG00000002726
LRRFIP1	ENSGALG00000003862
MEF2A	ENSGALG00000032366
MEF2D	ENSGALG00000037787
MYO18A	ENSGALG00000003741
PALLD	ENSGALG00000009650
PDLIM5	ENSGALG00000012211
PHYKPL	ENSGALG00000023920
PPFIBP1	ENSGALG00000014106
PPP1R12A	ENSGALG00000010325
PXDN	ENSGALG00000016377
SCRIB	ENSGALG00000000075
USP47	ENSGALG00000005569

## Sheet: fly_mammal_genes
mammalian_gene	FlyBase_gene
ADD3	FBgn0263391
AFF2	FBgn0041111
ASPH	FBgn0034075
ATP2B1	FBgn0259214
BIN1	FBgn0027356
CAMSAP1	FBgn0263197
CAMTA1	FBgn0259234
DST	FBgn0013733
DTNA	FBgn0033739
DUSP3	FBgn0030976
HEATR5B	FBgn0037541
LMO7	FBgn0263346
MACF1	FBgn0013733
MBNL2	FBgn0265487
NCAM1	FBgn0000635
PPFIA1	FBgn0046704
SLC4A4	FBgn0259111
STRN3	FBgn0044323
TTN	FBgn0005666
WASF1	FBgn0041781
ZNF678	FBgn0020309

## Sheet: worm_mammal_genes
mammalian_gene	Celegans_gene
ADD1	add-1
APBB2	feh-1
APP	apl-1
CACNA2D1	unc-36
